# Supplementary material for: I2-TBHP-catalyzed one-pot highly efficient synthesis of 4,3-fused 1,2,4-triazoles from N-tosylhydrazones and aromatic N-heterocycles via intermolecular formal 1,3-dipolar cycloaddition
Source: Royal Society of Chemistry journal article supplement (doi:10.1039/c6ob01926a), 2016-01-01
Supplement: c6ob01926a1.pdf [file c6ob01926a1.pdf]

## Electronic supplementary information for

### **I<sub>2</sub>-TBHP-catalyzed one-pot highly efficient synthesis of 4,3-fused 1,2,4-triazoles from *N*-tosylhydrazones and aromatic *N*-heterocycles via intermolecular formal 1,3-dipolar cycloaddition**

Surendra Babu Inturi,<sup>a,b</sup> Biswajit Kalita\*<sup>a</sup> and A. Jafar Ahamed\*<sup>b</sup>

<sup>a</sup>*Medicinal Chemistry Division, Jubilant Biosys Ltd, #96, Industrial Suburb, 2nd Stage, Yeshwanthpur, Bangalore 560022, Karnataka, India.*

<sup>b</sup>*Post Graduate and Research Department of Chemistry, Jamal Mohamed College (Autonomous), affiliated to Bharathidasan University, Tiruchirappalli - 620020, Tamil Nadu, India.*

*\*Corresponding authors. Tel.: +91-80-6662-8645.  
E-mail address: biswajit\_kalita@jubilantbiosys.com  
E-mail address: agjafar@yahoo.co.in*

#### **Table of contents**

|                                                                                      |         |
|--------------------------------------------------------------------------------------|---------|
| General experimental methods                                                         | S2      |
| Optimization of reaction conditions                                                  | S3-S4   |
| General procedure for the preparation of <i>N</i> -tosylhydrazones                   | S5      |
| Characterization data of new <i>N</i> -tosylhydrazones                               | S5-S6   |
| Experimental procedure for compounds <b>3a-r</b> , <b>5a-j</b> & <b>6a-u</b>         | S7      |
| Experimental procedure for compounds <b>6v-x</b>                                     | S7      |
| Characterization data of all synthesized compounds                                   | S8-S30  |
| References                                                                           | S30     |
| Crystal preparations and X-ray crystal structures of compounds <b>3h</b> & <b>6k</b> | S31-S32 |

## 1. General experimental methods:

All reagents were purchased from commercial suppliers and used without further purification. Solvents were used without drying.  $^1\text{H}$  and  $^{13}\text{C}$  NMR spectra were recorded at 400 MHz and 100.5 MHz on Varian NMR spectrometer with  $\text{CDCl}_3$  (or)  $\text{DMSO-}d_6$  as solvent. Chemical shifts were reported in  $\delta$  ppm using tetramethylsilane ( $\delta$  0.00 ppm) as the internal standard when using  $\text{CDCl}_3$  as solvent in  $^1\text{H}$  NMR and residual solvent protons as internal standard ( $\delta$  2.48 ppm for  $\text{DMSO-}d_6$  in  $^1\text{H}$ -NMR,  $\delta$  77.0 ppm for  $\text{CDCl}_3$  and  $\delta$  40.0 ppm for  $\text{DMSO-}d_6$  in  $^{13}\text{C}$ -NMR). Coupling constants (J) were reported in Hz and refer to apparent peak multiplications. The peak splitting patterns were indicated as follows: s, singlet; d, doublet; t, triplet; q, quartet; m, multiplet; dd, doublet of doublets; td, triplet of doublets; quint, quintet; sext, sextet; bs, broad singlet. High resolution mass spectra were obtained on WATERS Q-TOF Premier-HAB213 spectrometer in ESI mode. Melting points were recorded using Buchi melting point apparatus and temperatures were uncorrected. Thin layer chromatography was performed on aluminium plates coated with silica gel 60 with  $\text{F}_{254}$  indicator. The *N*-tosylhydrazones **1** were synthesized according to the reported procedure.<sup>1</sup>

**Table S1:** Optimization of reaction conditions.<sup>a</sup>

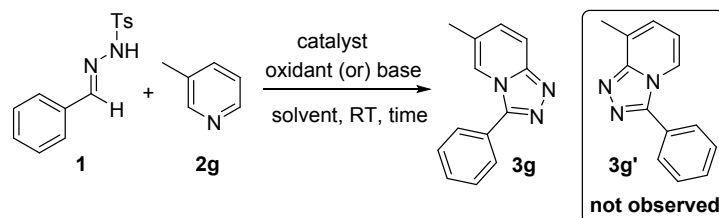

| Entry           | Catalyst             | Oxidant <sup>j</sup><br>/Base                | Solvent     | Time<br>[h] | Yield [%] <sup>b</sup> |
|-----------------|----------------------|----------------------------------------------|-------------|-------------|------------------------|
| 1 <sup>c</sup>  | I <sub>2</sub>       |                                              | DCM         | 16          | 11                     |
| 2 <sup>d</sup>  | I <sub>2</sub>       | Cs <sub>2</sub> CO <sub>3</sub>              | DCM         | 16          | 28                     |
| 3 <sup>d</sup>  | I <sub>2</sub>       | DBU                                          | DCM         | 16          | 10                     |
| 4 <sup>d</sup>  | I <sub>2</sub>       | K <sub>2</sub> CO <sub>3</sub>               | DCM         | 16          | 24                     |
| 5               | I <sub>2</sub>       | TEMPO                                        | DCM         | 16          | trace                  |
| 6               | I <sub>2</sub>       | K <sub>2</sub> S <sub>2</sub> O <sub>8</sub> | DCM         | 16          | trace                  |
| 7               | I <sub>2</sub>       | DTBP                                         | DCM         | 16          | 8                      |
| 8               | I <sub>2</sub>       | H <sub>2</sub> O <sub>2</sub>                | DCM         | 12          | 52                     |
| 9               | I <sub>2</sub>       | BPO <sup>k</sup>                             | DCM         | 12          | 41                     |
| 10 <sup>e</sup> | I <sub>2</sub>       | TBHP                                         | DCM         | 8           | 68                     |
| <b>11</b>       | <b>I<sub>2</sub></b> | <b>TBHP</b>                                  | <b>DCM</b>  | <b>6</b>    | <b>85</b>              |
| 12              |                      | TBHP                                         | DCM         | 16          | 0                      |
| 13              | I <sub>2</sub>       |                                              | DCM         | 16          | trace                  |
| 14              | PhI                  | TBHP                                         | DCM         | 16          | 0                      |
| 15              | NaI                  | TBHP                                         | DCM         | 7           | 70                     |
| 16              | KI                   | TBHP                                         | DCM         | 7           | 72                     |
| 17              | NIS                  | TBHP                                         | DCM         | 10          | 51                     |
| 18              | TBAI                 | TBHP                                         | DCM         | 10          | 53                     |
| 19              | I <sub>2</sub>       | TBHP                                         | THF         | 16          | 40                     |
| 20              | I <sub>2</sub>       | TBHP                                         | 1,4-dioxane | 16          | 45                     |
| 21              | I <sub>2</sub>       | TBHP                                         | 1,2-DCE     | 10          | 70                     |
| 22              | I <sub>2</sub>       | TBHP                                         | DMF         | 16          | 15                     |
| 23 <sup>f</sup> | I <sub>2</sub>       | TBHP                                         | DCM         | 12          | 69                     |
| 24 <sup>g</sup> | I <sub>2</sub>       | TBHP                                         | DCM         | 4           | 73                     |
| 25 <sup>h</sup> | I <sub>2</sub>       | TBHP                                         | DCM         | 2           | 47                     |
| 26 <sup>i</sup> | I <sub>2</sub>       | TBHP                                         | DCM         | 10          | 64                     |

Reaction conditions: <sup>a</sup> **1** (0.5 mmol), **2g** (1.0 mmol), catalyst (20 mol%), oxidant (1.0 mmol) in CH<sub>2</sub>Cl<sub>2</sub> (3.0 mL), RT (24–25 °C), open air. <sup>b</sup> Isolated yields. <sup>c</sup> I<sub>2</sub> (0.5 mmol). <sup>d</sup> I<sub>2</sub> (0.5 mmol), base (0.5 mmol). <sup>e</sup> TBHP (70% aqueous). <sup>f</sup> I<sub>2</sub> (10 mol%). <sup>g</sup> I<sub>2</sub> (40 mol%). <sup>h</sup> At 40 °C. <sup>i</sup> **2g** (0.7 mmol). <sup>j</sup> TBHP (5–6 M in decane). <sup>k</sup> BPO (benzoyl peroxide).

We initially began our investigation reaction between *N'*-benzylidene-4-methylbenzenesulfonohydrazide **1** and 3-methylpyridine **2g** using I<sub>2</sub> (1 equiv) in DCM at room temperature (Table S1, entry 1). To our delight, the desired compound **3g** was obtained in 11% yield over a period of 16 h with complete regioselectivity (confirmed by <sup>1</sup>H NMR) along with the recovery of the un-reacted starting materials as indicated by TLC. The optimization results are summarized in Table S1. Our study began by screening of external base (1 equiv, such as Cs<sub>2</sub>CO<sub>3</sub>, DBU and K<sub>2</sub>CO<sub>3</sub>), however none of them improved the yields significantly (Table S1, entries 2–4). Next, we sought to test the feasibility of the reaction with various oxidants and catalytic I<sub>2</sub> (20 mol%). It was noteworthy to mention that the desired product **3g** was achieved in 85% yield in 6 h using 2 equiv of *tert*-butyl hydroperoxide [TBHP (5–6 M) in decane] in DCM at room temperature (Table S1, entry 11). The reaction failed to proceed in absence of I<sub>2</sub> or TBHP over a period of 16 h (Table S1, entries 12 and 13) suggesting the crucial roles of both I<sub>2</sub> and TBHP together for the formation of **3g**. The reaction proceeded less efficiently in other iodine sources such as PhI, NaI, KI, NIS and TBAI even after prolonging the reaction time (Table S1, entries 14–18). Moreover, from the solvent screening results, DCM proved to be the best choice (Table S1, entries 19–22). In order to optimize the I<sub>2</sub> loading, it was found that either lowering the I<sub>2</sub> loading to 10 mol% or increasing to 40 mol% did not improve the yield of **3g** (Table S1, entries 23 and 24). Finally, the effect of temperature was examined and it was found that increasing the temperature up to 40 °C lowered the yield of **3g** (Table S1, entry 25). A reduction in yield of **3g** was observed while lowering the amount of **2g** to 1.4 equiv even after increasing the reaction time up to 10 h (Table S1, entry 26). Thus, the optimized catalytic system was established as: **1** (1 equiv), **2g** (2 equiv), I<sub>2</sub> (20 mol%), TBHP (2 equiv) in DCM at room temperature (Table S1, entry 11).

## 2. General procedure for the preparation of *N*-tosylhydrazones:<sup>1</sup>

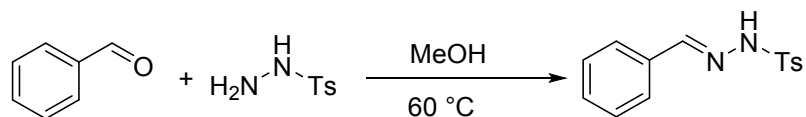

To a stirred solution of TsNHNH<sub>2</sub> (5 mmol) in methanol (5 mL) was heated to 60 °C until the TsNHNH<sub>2</sub> was completely dissolved. Then carbonyl compounds (5 mmol) were dropped to the mixture slowly (solid reagents were added as a methanol solution or portion wise). After approximately 30 min the mixture was cooled to 0 °C and the precipitated products was removed by filtration. The precipitates were washed by petroleum ether then were dried under vacuum to afford the pure products.

## 3. Characterization data of new *N*-tosylhydrazones:

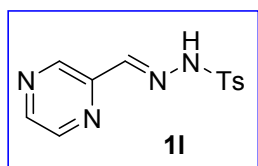

### 4-methyl-*N'*-(pyrazin-2-ylmethylene)benzenesulfonohydrazide (11)

Brown solid; Yield: 90%; M.p.: 169-170 °C;  $R_f$  = 0.62 (EtOAc/hexane = 3:1); <sup>1</sup>H NMR (400 MHz, DMSO-*d*<sub>6</sub>): δ 11.95 (s, 1H), 8.90 (s, 1H), 8.59 – 8.58 (m, 2H), 7.90 (s, 1H), 7.77 (d,  $J$  = 8.0 Hz, 2H), 7.40 (d,  $J$  = 8.0 Hz, 2H), 2.34 (s, 3H); <sup>13</sup>C NMR (100.5 MHz, DMSO-*d*<sub>6</sub>): δ 148.3, 145.1, 144.8, 144.7, 144.2, 142.0, 136.3, 130.2, 127.6, 21.4. HRMS–ESI ( $m/z$ ): [M+Na]<sup>+</sup> calcd for C<sub>12</sub>H<sub>12</sub>N<sub>4</sub>NaO<sub>2</sub>S, 299.0579; found, 299.0579.

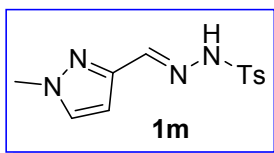

**4-methyl-*N'*-((1-methyl-1H-pyrazol-3-yl)methylene)benzenesulfonohydrazide (1m)**

White solid; Yield: 89%; M.p.: 149-151 °C;  $R_f = 0.5$  (EtOAc/hexane = 3:1);  $^1\text{H}$  NMR (400 MHz, DMSO- $d_6$ ):  $\delta$  11.25 (s, 1H), 7.83 (s, 1H), 7.70 (d,  $J = 8.0$  Hz, 2H), 7.65 (d,  $J = 1.6$  Hz, 1H), 7.37 (d,  $J = 8.0$  Hz, 2H), 6.39 (d,  $J = 1.2$  Hz, 1H), 3.79 (s, 3H), 2.34 (s, 3H);  $^{13}\text{C}$  NMR (100.5 MHz, DMSO- $d_6$ ):  $\delta$  147.0, 143.8, 142.3, 136.6, 132.8, 130.0, 127.6, 103.2, 39.1, 21.4. HRMS–ESI ( $m/z$ ):  $[\text{M}+\text{Na}]^+$  calcd for  $\text{C}_{12}\text{H}_{14}\text{N}_4\text{NaO}_2\text{S}$ , 301.0735; found, 301.0737.

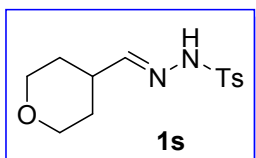

**4-methyl-*N'*-((tetrahydro-2H-pyran-4-yl)methylene)benzenesulfonohydrazide (1s)**

White solid; Yield: 86%; M.p.: 119-121 °C;  $R_f = 0.72$  (EtOAc/hexane = 3:1);  $^1\text{H}$  NMR (400 MHz, DMSO- $d_6$ ):  $\delta$  10.84 (s, 1H), 7.65 (d,  $J = 8.0$  Hz, 2H), 7.37 (d,  $J = 8.0$  Hz, 2H), 7.15 (d,  $J = 4.4$  Hz, 1H), 3.73 – 3.70 (m, 2H), 3.28 – 3.27 (m, 0.5H), 3.23 – 3.22 (m, 1.5H), 2.36 (s, 3H), 2.33 – 2.29 (m, 1H), 1.51 – 1.48 (m, 2H), 1.33 – 1.23 (m, 2H);  $^{13}\text{C}$  NMR (100.5 MHz, DMSO- $d_6$ ):  $\delta$  154.2, 143.6, 136.6, 129.9, 127.6, 66.5, 37.4, 29.6, 21.4. HRMS–ESI ( $m/z$ ):  $[\text{M}+\text{Na}]^+$  calcd for  $\text{C}_{13}\text{H}_{18}\text{N}_2\text{NaO}_3\text{S}$ , 305.0936; found, 305.0938.

#### 4. Experimental procedure for compounds 3a-r, 5a-j & 6a-u:

To a stirred solution of N-sulfonylhydrazones (0.5 mmol, 1 equiv) and aromatic *N*-heterocycles (1.0 mmol, 2 equiv) in DCM (3.0 mL) was added 5–6 M solution of TBHP in decane (1.0 mmol, 2 equiv) and iodine (20 mol %). The reaction mixture was stirred at room temperature as monitored by TLC. After completion, the reaction mixture was quenched with 10% aqueous Na<sub>2</sub>S<sub>2</sub>O<sub>3</sub> solution (2.5 mL) and extracted with DCM (2x10 mL), the combined organic layers were dried over Na<sub>2</sub>SO<sub>4</sub>, filtered, and evaporated under vacuum. The crude products were purified by flash column chromatography on silica gel using ethyl acetate (EtOAc) and hexane to give the fused triazoles **3a-l**, **3o-q**, **5a-j** & **6a-u**.

#### 5. Experimental procedure for compounds 6v-x:

To a stirred solution of TsNHNH<sub>2</sub> (0.5 mmol) in dichloromethane (3 mL) was added carbonyl compounds (0.5 mmol) at room temperature. This reaction mixture was stirred at room temperature for 1 hour. After this time, was added 3-methylpyridine (1.0 mmol, 2 equiv) followed by added 5–6 M solution of TBHP in decane (1.0 mmol, 2 equiv) and iodine (20 mol %) to the above reaction mixture. The reaction mixture was stirred at room temperature for 2 hours as monitored by TLC. After completion, the reaction mixture was quenched with 10% aqueous Na<sub>2</sub>S<sub>2</sub>O<sub>3</sub> solution (2.5 mL) and extracted with DCM (2x10 mL), the combined organic layers were dried over Na<sub>2</sub>SO<sub>4</sub>, filtered, and evaporated under vacuum. The crude products were purified by flash column chromatography on silica gel using ethyl acetate and hexane to give the fused triazoles **6v-x**.

## 6. Characterization data of all synthesized compounds:

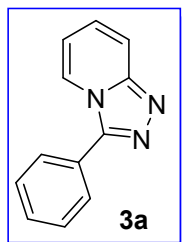

### 3-phenyl-[1,2,4]triazolo[4,3-a]pyridine (3a)

White solid; Yield: 85%; M.p.: 175-176 °C (lit: 172-174 °C,<sup>2</sup> 172 °C,<sup>3</sup> 172-173 °C<sup>4</sup>);  $R_f = 0.4$  (EtOAc/hexane = 3:1);  $^1\text{H NMR}$  (400 MHz,  $\text{CDCl}_3$ ):  $\delta$  8.28 (d,  $J = 7.2$  Hz, 1H), 7.84 – 7.83 (m, 3H), 7.61 – 7.53 (m, 3H), 7.30 – 7.28 (m, 1H), 6.86 (t,  $J = 6.8$  Hz, 1H);  $^{13}\text{C NMR}$  (100.5 MHz,  $\text{CDCl}_3$ ):  $\delta$  150.5, 146.7, 130.1, 129.2, 128.2, 126.9, 126.6, 122.5, 116.8, 114.1. ESI-MS  $[\text{M}+\text{H}]^+$   $m/z$  196.1.

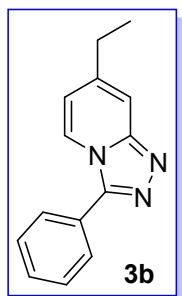

### 7-ethyl-3-phenyl-[1,2,4]triazolo[4,3-a]pyridine (3b)

White solid; Yield: 87%; M.p.: 74-75 °C;  $R_f = 0.42$  (EtOAc/hexane = 3:1);  $^1\text{H NMR}$  (400 MHz,  $\text{CDCl}_3$ ):  $\delta$  8.17 (d,  $J = 7.2$  Hz, 1H), 7.82 (d,  $J = 6.8$  Hz, 2H), 7.59 – 7.51 (m, 4H), 6.71 (d,  $J = 6.4$  Hz, 1H), 2.73 (q,  $J = 7.6$  Hz, 2H), 1.31 (t,  $J = 7.6$  Hz, 3H);  $^{13}\text{C NMR}$  (100.5 MHz,  $\text{CDCl}_3$ ):  $\delta$  151.2, 146.2, 144.1, 129.9, 129.2, 128.1, 126.8, 121.8, 116.2, 112.9, 28.3, 13.8. HRMS-ESI ( $m/z$ ):  $[\text{M}+\text{Na}]^+$  calcd for  $\text{C}_{14}\text{H}_{13}\text{N}_3\text{Na}$ , 246.1007; found, 246.1006.



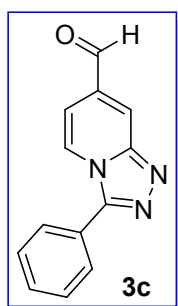

### 3-phenyl-[1,2,4]triazolo[4,3-a]pyridine-7-carbaldehyde (3c)

White solid; Yield: 89%; M.p.: 182-184 °C;  $R_f = 0.37$  (EtOAc/hexane = 3:1);  $^1\text{H}$  NMR (400 MHz,  $\text{CDCl}_3$ ):  $\delta$  10.05 (s, 1H), 8.35 – 8.33 (m, 2H), 7.87 – 7.84 (m, 2H), 7.63 – 7.61 (m, 3H), 7.36 (d,  $J = 8.0$  Hz, 1H);  $^{13}\text{C}$  NMR (100.5 MHz,  $\text{CDCl}_3$ ):  $\delta$  189.0, 150.0, 148.1, 134.7, 130.8, 129.5, 128.3, 125.8, 123.7, 123.5, 110.1. HRMS–ESI ( $m/z$ ):  $[\text{M}+\text{H}]^+$  calcd for  $\text{C}_{13}\text{H}_{10}\text{N}_3\text{O}$ , 224.0824; found, 224.0825.

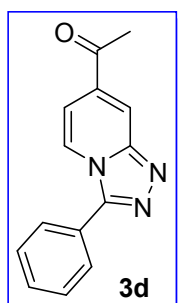

### 1-(3-phenyl-[1,2,4]triazolo[4,3-a]pyridin-7-yl)ethanone (3d)

White solid; Yield: 92%; M.p.: 253-254 °C;  $R_f = 0.38$  (EtOAc/hexane = 3:1);  $^1\text{H}$  NMR (400 MHz,  $\text{DMSO}-d_6$ ):  $\delta$  8.61 – 8.57 (m, 2H), 7.92 – 7.90 (m, 2H), 7.64 – 7.58 (m, 3H), 7.31 (d,  $J = 7.6$  Hz, 1H), 2.67 (s, 3H);  $^{13}\text{C}$  NMR (100.5 MHz,  $\text{DMSO}-d_6$ ):  $\delta$  196.6, 150.3, 147.4, 135.4, 130.7, 129.7, 128.6, 126.6, 124.4, 118.8, 111.8, 26.7. HRMS–ESI ( $m/z$ ):  $[\text{M}+\text{H}]^+$  calcd for  $\text{C}_{14}\text{H}_{12}\text{N}_3\text{O}$ , 238.0980; found, 238.0987.

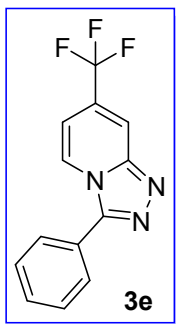

### 3-phenyl-7-(trifluoromethyl)-[1,2,4]triazolo[4,3-*a*]pyridine (3e)

White solid; Yield: 46%; M.p.: 225-226 °C;  $R_f = 0.4$  (EtOAc/hexane = 3:1);  $^1\text{H NMR}$  (400 MHz,  $\text{CDCl}_3$ ):  $\delta$  8.38 (d,  $J = 7.6$  Hz, 1H), 8.16 (s, 1H), 7.84 (d,  $J = 5.6$  Hz, 2H), 7.62 – 7.61 (m, 3H), 7.01 (d,  $J = 7.2$  Hz, 1H);  $^{13}\text{C NMR}$  (100.5 MHz,  $\text{CDCl}_3$ ):  $\delta$  148.9, 147.7, 130.8, 129.5, 129.2 (q,  $J_{\text{C-F}} = 34.4$  Hz), 128.3, 125.8, 123.9, 122.5 (q,  $J_{\text{C-F}} = 273.3$  Hz), 115.4 (q,  $J_{\text{C-F}} = 5.0$  Hz), 110.1 (d,  $J_{\text{C-F}} = 2.3$  Hz). HRMS–ESI ( $m/z$ ):  $[\text{M}+\text{Na}]^+$  calcd for  $\text{C}_{13}\text{H}_8\text{F}_3\text{N}_3\text{Na}$ , 286.0568; found, 286.0565.

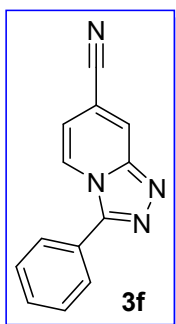

### 3-phenyl-[1,2,4]triazolo[4,3-*a*]pyridine-7-carbonitrile (3f)

Brown solid; Yield: 41%; M.p.: 225-226 °C;  $R_f = 0.38$  (EtOAc/hexane = 3:1);  $^1\text{H NMR}$  (400 MHz,  $\text{CDCl}_3$ ):  $\delta$  8.36 (d,  $J = 7.2$  Hz, 1H), 8.26 (s, 1H), 7.83 – 7.82 (m, 2H), 7.62 – 7.61 (m, 3H), 6.97 (d,  $J = 7.2$  Hz, 1H);  $^{13}\text{C NMR}$  (100.5 MHz,  $\text{CDCl}_3$ ):  $\delta$  148.6, 148.1, 131.0, 129.5, 128.3, 125.4, 124.0, 123.9, 116.3, 113.8, 110.7. HRMS–ESI ( $m/z$ ):  $[\text{M}+\text{H}]^+$  calcd for  $\text{C}_{13}\text{H}_9\text{N}_4$ , 221.0827; found, 221.0826.

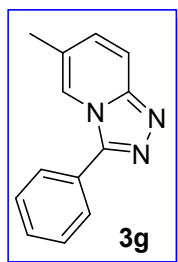

### 6-methyl-3-phenyl-[1,2,4]triazolo[4,3-a]pyridine (3g)<sup>5</sup>

White solid; Yield: 85%; M.p.: 155-156 °C;  $R_f$  = 0.4 (EtOAc/hexane = 3:1);  $^1\text{H}$  NMR (400 MHz,  $\text{CDCl}_3$ ):  $\delta$  8.03 (s, 1H), 7.82 (d,  $J$  = 7.6 Hz, 2H), 7.73 (d,  $J$  = 10.0 Hz, 1H), 7.60 – 7.52 (m, 3H), 7.13 (d,  $J$  = 9.6 Hz, 1H), 2.33 (s, 3H);  $^{13}\text{C}$  NMR (100.5 MHz,  $\text{CDCl}_3$ ):  $\delta$  149.9, 146.3, 130.4, 129.9, 129.2, 128.2, 126.9, 124.0, 119.5, 115.9, 18.2. ESI-MS  $[\text{M}+\text{H}]^+$   $m/z$  210.1.

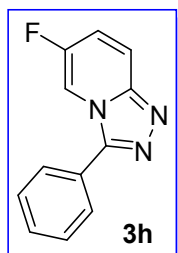

### 6-fluoro-3-phenyl-[1,2,4]triazolo[4,3-a]pyridine (3h)

White solid; Yield: 65%; M.p.: 162-163 °C;  $R_f$  = 0.4 (EtOAc/hexane = 3:1);  $^1\text{H}$  NMR (400 MHz,  $\text{CDCl}_3$ ):  $\delta$  8.20 (s, 1H), 7.85 – 7.80 (m, 3H), 7.62 – 7.54 (m, 3H), 7.23 – 7.21 (m, 1H);  $^{13}\text{C}$  NMR (100.5 MHz,  $\text{CDCl}_3$ ):  $\delta$  154.0 (d,  $J_{\text{C-F}}$  = 242.9 Hz), 148.6, 147.7, 130.4, 129.4, 128.0, 126.2, 120.2 (d,  $J_{\text{C-F}}$  = 27.2 Hz), 117.7 (d,  $J_{\text{C-F}}$  = 9.3 Hz), 109.0 (d,  $J_{\text{C-F}}$  = 41.2 Hz). HRMS-ESI ( $m/z$ ):  $[\text{M}+\text{H}]^+$  calcd for  $\text{C}_{12}\text{H}_9\text{FN}_3$ , 214.0781; found, 214.0780.

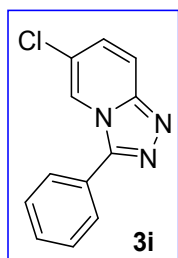

### 6-chloro-3-phenyl-[1,2,4]triazolo[4,3-*a*]pyridine (3i)

White solid; Yield: 68%; M.p.: 154-156 °C (lit: 154-156 °C<sup>2</sup>);  $R_f = 0.4$  (EtOAc/hexane = 3:1); <sup>1</sup>H NMR (400 MHz, DMSO-*d*<sub>6</sub>): δ 8.67 (s, 1H), 7.92 – 7.90 (m, 3H), 7.61 – 7.57 (m, 3H), 7.47 (d,  $J = 9.6$  Hz, 1H); <sup>13</sup>C NMR (100.5 MHz, DMSO-*d*<sub>6</sub>): δ 149.1, 146.8, 130.6, 129.7, 129.4, 128.6, 126.5, 122.3, 121.9, 117.0. ESI-MS [M+H]<sup>+</sup>  $m/z$  230.1.

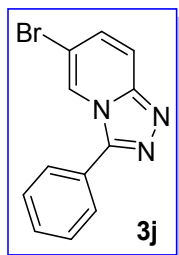

### 6-bromo-3-phenyl-[1,2,4]triazolo[4,3-*a*]pyridine (3j)

White solid; Yield: 71%; M.p.: 171-173 °C (lit: 174-175 °C<sup>6</sup>);  $R_f = 0.4$  (EtOAc/hexane = 3:1); <sup>1</sup>H NMR (400 MHz, CDCl<sub>3</sub>): δ 8.40 (s, 1H), 7.81 (d,  $J = 6.0$  Hz, 2H), 7.73 (d,  $J = 9.6$  Hz, 1H), 7.63 – 7.56 (m, 3H), 7.33 (d,  $J = 9.6$  Hz, 1H); <sup>13</sup>C NMR (100.5 MHz, CDCl<sub>3</sub>): δ 149.0, 146.6, 130.7, 130.5, 129.4, 128.2, 126.0, 122.5, 117.4, 109.4. ESI-MS [M+H]<sup>+</sup>  $m/z$  274.0.

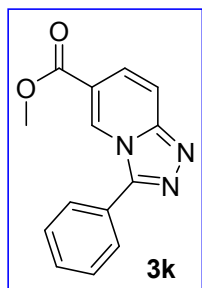

### methyl 3-phenyl-[1,2,4]triazolo[4,3-*a*]pyridine-6-carboxylate (3k)

White solid; Yield: 68%; M.p.: 155-157 °C;  $R_f = 0.38$  (EtOAc/hexane = 3:1); <sup>1</sup>H NMR (400 MHz, CDCl<sub>3</sub>): δ 8.99 (s, 1H), 7.85 – 7.79 (m, 4H), 7.65 – 7.58 (m, 3H), 3.96 (s, 3H); <sup>13</sup>C NMR

(100.5 MHz, CDCl<sub>3</sub>):  $\delta$  164.3, 150.4, 147.8, 130.6, 129.5, 128.4, 127.1, 126.4, 125.9, 118.6, 116.2, 52.7. HRMS–ESI ( $m/z$ ): [M+Na]<sup>+</sup> calcd for C<sub>14</sub>H<sub>11</sub>N<sub>3</sub>NaO<sub>2</sub>, 276.0749; found, 276.0750.

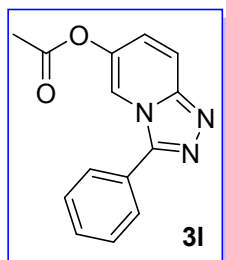

### 3-phenyl-[1,2,4]triazolo[4,3-*a*]pyridin-6-yl acetate (**3l**)

Colorless oil; Yield: 73%;  $R_f$  = 0.35 (EtOAc/hexane = 3:1); <sup>1</sup>H NMR (400 MHz, CDCl<sub>3</sub>):  $\delta$  8.28 (s, 1H), 7.83 – 7.81 (m, 3H), 7.60 – 7.55 (m, 3H), 7.12 (dd,  $J$  = 10, 1.6 Hz, 1H), 2.33 (s, 3H); <sup>13</sup>C NMR (100.5 MHz, CDCl<sub>3</sub>):  $\delta$  168.7, 148.9, 147.5, 140.7, 130.3, 129.3, 128.1, 126.3, 124.6, 116.7, 115.0, 20.8. HRMS–ESI ( $m/z$ ): [M+Na]<sup>+</sup> calcd for C<sub>14</sub>H<sub>11</sub>N<sub>3</sub>NaO<sub>2</sub>, 276.0749; found, 276.0750.

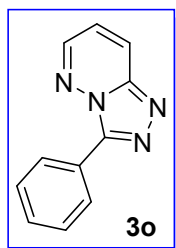

### 3-phenyl-[1,2,4]triazolo[4,3-*b*]pyridazine (**3o**)<sup>7</sup>

Brown solid; Yield: 73%; M.p.: 152-153 °C;  $R_f$  = 0.3 (EtOAc/hexane = 3:1); <sup>1</sup>H NMR (400 MHz, CDCl<sub>3</sub>):  $\delta$  8.49 – 8.45 (m, 3H), 8.20 (d,  $J$  = 9.2 Hz, 1H), 7.58 – 7.50 (m, 3H), 7.14 (dd,  $J$  = 9.2, 4.0 Hz, 1H); <sup>13</sup>C NMR (100.5 MHz, CDCl<sub>3</sub>):  $\delta$  148.1, 145.0, 144.8, 130.2, 128.6, 127.7, 126.1, 125.4, 119.2. ESI-MS [M+H]<sup>+</sup>  $m/z$  197.1.

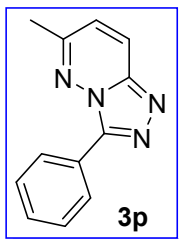

### 6-methyl-3-phenyl-[1,2,4]triazolo[4,3-*b*]pyridazine (3p)

Brown solid; Yield: 69%; M.p.: 154-155 °C;  $R_f = 0.3$  (EtOAc/hexane = 3:1);  $^1\text{H NMR}$  (400 MHz,  $\text{CDCl}_3$ ):  $\delta$  8.52 – 8.49 (m, 2H), 8.06 (d,  $J = 9.6$  Hz, 1H), 7.57 – 7.48 (m, 3H), 7.01 (d,  $J = 9.6$  Hz, 1H), 2.66 (s, 3H);  $^{13}\text{C NMR}$  (100.5 MHz,  $\text{CDCl}_3$ ):  $\delta$  154.4, 147.7, 144.2, 130.0, 128.5, 127.6, 126.4, 124.6, 121.6, 21.9. HRMS–ESI ( $m/z$ ):  $[\text{M}+\text{Na}]^+$  calcd for  $\text{C}_{12}\text{H}_{10}\text{N}_4\text{Na}$ , 233.0803; found, 233.0804.

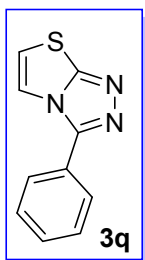

### 3-phenylthiazolo[2,3-*c*][1,2,4]triazole (3q)

Brown solid; Yield: 32%; M.p.: 159-160 °C;  $R_f = 0.28$  (EtOAc/hexane = 3:1);  $^1\text{H NMR}$  (400 MHz,  $\text{DMSO-}d_6$ ):  $\delta$  8.26 (d,  $J = 4.0$  Hz, 1H), 7.94 (d,  $J = 6.8$  Hz, 2H), 7.56 – 7.52 (m, 4H);  $^{13}\text{C NMR}$  (100.5 MHz,  $\text{DMSO-}d_6$ ):  $\delta$  158.5, 146.8, 130.2, 129.6, 127.0, 126.6, 119.5, 118.3. HRMS–ESI ( $m/z$ ):  $[\text{M}+\text{Na}]^+$  calcd for  $\text{C}_{10}\text{H}_7\text{N}_3\text{NaS}$ , 224.0258; found, 224.0261.

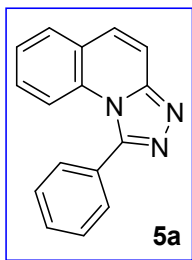

### 1-phenyl-[1,2,4]triazolo[4,3-*a*]quinoline (5a)

White solid; Yield: 80%; M.p.: 136-138 °C (lit: 135-137 °C<sup>2</sup>);  $R_f = 0.42$  (EtOAc/hexane = 3:1); <sup>1</sup>H NMR (400 MHz, DMSO-*d*<sub>6</sub>): δ 7.97 (d,  $J = 8.0$  Hz, 1H), 7.79 (d,  $J = 9.2$  Hz, 1H), 7.73 – 7.61 (m, 6H), 7.48 (t,  $J = 7.2$  Hz, 1H), 7.40 (t,  $J = 7.6$  Hz, 1H), 7.33 (d,  $J = 8.4$  Hz, 1H); <sup>13</sup>C NMR (100.5 MHz, DMSO-*d*<sub>6</sub>): δ 149.5, 148.8, 131.8, 130.9, 130.3, 130.3, 130.1, 130.0, 129.5, 129.4, 126.5, 124.6, 116.3, 115.0. ESI-MS [M+H]<sup>+</sup>  $m/z$  246.1.

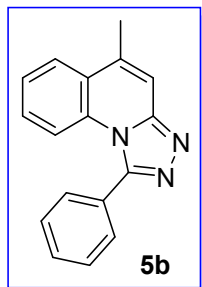

### 5-methyl-1-phenyl-[1,2,4]triazolo[4,3-*a*]quinoline (5b)

White solid; Yield: 90%; M.p.: 153-154 °C (lit: 152-153 °C<sup>8</sup>);  $R_f = 0.42$  (EtOAc/hexane = 3:1); <sup>1</sup>H NMR (400 MHz, DMSO-*d*<sub>6</sub>): δ 8.02 (d,  $J = 8.0$  Hz, 1H), 7.70 – 7.62 (m, 6H), 7.54 (t,  $J = 7.2$  Hz, 1H), 7.46 – 7.40 (m, 2H), 2.60 (s, 3H); <sup>13</sup>C NMR (100.5 MHz, DMSO-*d*<sub>6</sub>): δ 149.2, 148.4, 137.2, 131.6, 130.9, 130.3, 130.2, 129.5, 129.3, 126.7, 126.4, 124.9, 116.5, 113.7, 19.3. ESI-MS [M+H]<sup>+</sup>  $m/z$  260.1.

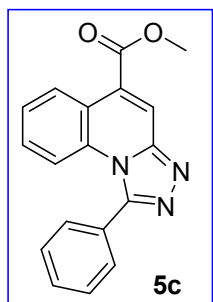

### methyl 1-phenyl-[1,2,4]triazolo[4,3-*a*]quinoline-5-carboxylate (5c)

White solid; Yield: 56%; M.p.: 191-193 °C;  $R_f = 0.4$  (EtOAc/hexane = 3:1);  $^1\text{H NMR}$  (400 MHz,  $\text{CDCl}_3$ ):  $\delta$  8.82 (d,  $J = 8.4$  Hz, 1H), 8.40 (s, 1H), 7.70 – 7.59 (m, 6H), 7.52 (t,  $J = 7.8$  Hz, 1H), 7.37 (t,  $J = 7.6$  Hz, 1H), 4.05 (s, 3H);  $^{13}\text{C NMR}$  (100.5 MHz,  $\text{CDCl}_3$ ):  $\delta$  165.5, 149.8, 148.5, 131.9, 130.7, 129.8, 129.7, 129.2, 129.1, 129.0, 128.6, 128.1, 126.6, 121.7, 119.8, 116.9, 52.8. HRMS–ESI ( $m/z$ ):  $[\text{M}+\text{H}]^+$  calcd for  $\text{C}_{18}\text{H}_{14}\text{N}_3\text{O}_2$ , 304.1086; found, 304.1082.

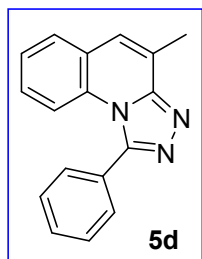

#### 4-methyl-1-phenyl-[1,2,4]triazolo[4,3-*a*]quinoline (5d)

White solid; Yield: 96%; M.p.: 179-180 °C;  $R_f = 0.42$  (EtOAc/hexane = 3:1);  $^1\text{H NMR}$  (400 MHz,  $\text{DMSO-}d_6$ ):  $\delta$  7.89 (d,  $J = 7.6$  Hz, 1H), 7.71 – 7.62 (m, 5H), 7.60 (s, 1H), 7.46 (t,  $J = 7.4$  Hz, 1H), 7.37 – 7.29 (m, 2H), 2.59 (s, 3H);  $^{13}\text{C NMR}$  (100.5 MHz,  $\text{DMSO-}d_6$ ):  $\delta$  150.2, 149.3, 130.9, 130.9, 130.3, 130.1, 129.5, 129.1, 128.3, 127.5, 126.4, 125.0, 124.5, 116.1, 16.8. HRMS–ESI ( $m/z$ ):  $[\text{M}+\text{H}]^+$  calcd for  $\text{C}_{17}\text{H}_{14}\text{N}_3$ , 260.1188; found, 260.1186.

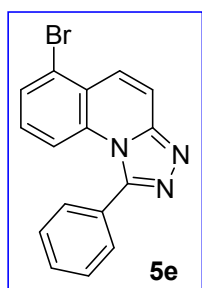

#### 6-bromo-1-phenyl-[1,2,4]triazolo[4,3-*a*]quinoline (5e)

Brown solid; Yield: 57%; M.p.: 171-172 °C;  $R_f = 0.4$  (EtOAc/hexane = 3:1);  $^1\text{H NMR}$  (400 MHz,  $\text{CDCl}_3$ ):  $\delta$  8.06 (d,  $J = 9.6$  Hz, 1H), 7.77 (d,  $J = 9.6$  Hz, 1H), 7.72 (d,  $J = 8.0$  Hz, 1H), 7.67 – 7.51 (m, 6H), 7.16 (t,  $J = 8.2$  Hz, 1H);  $^{13}\text{C NMR}$  (100.5 MHz,  $\text{CDCl}_3$ ):  $\delta$  149.5, 149.1, 132.9,



130.6, 130.3, 129.8, 129.3, 129.2, 129.1, 128.5, 123.9, 123.8, 116.4, 116.2. HRMS–ESI ( $m/z$ ):  $[M+H]^+$  calcd for  $C_{16}H_{11}BrN_3$ , 324.0136; found, 324.0139.

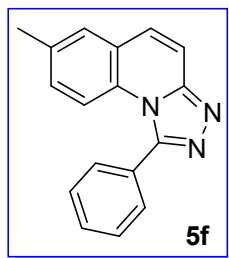

### 7-methyl-1-phenyl-[1,2,4]triazolo[4,3-*a*]quinoline (5f)

White solid; Yield: 86%; M.p.: 179-181 °C;  $R_f$  = 0.4 (EtOAc/hexane = 3:1);  $^1H$  NMR (400 MHz,  $CDCl_3$ ):  $\delta$  7.69 – 7.65 (m, 3H), 7.62 – 7.57 (m, 4H), 7.50 (d,  $J$  = 10.0 Hz, 1H), 7.42 (d,  $J$  = 8.8 Hz, 1H), 7.15 (d,  $J$  = 8.8 Hz, 1H), 2.44 (s, 3H);  $^{13}C$  NMR (100.5 MHz,  $CDCl_3$ ):  $\delta$  149.8, 148.8, 136.0, 130.4, 130.0, 129.9, 129.8, 129.6, 129.5, 129.0, 129.0, 124.6, 116.5, 114.9, 20.8. HRMS–ESI ( $m/z$ ):  $[M+H]^+$  calcd for  $C_{17}H_{14}N_3$ , 260.1188; found, 260.1186.

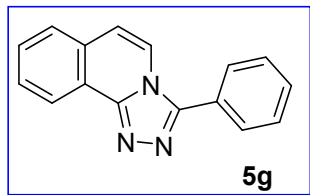

### 3-phenyl-[1,2,4]triazolo[3,4-*a*]isoquinoline (5g)

White solid; Yield: 87%; M.p.: 189-190 °C (lit: 181-183 °C<sup>2</sup>);  $R_f$  = 0.42 (EtOAc/hexane = 3:1);  $^1H$  NMR (400 MHz,  $CDCl_3$ ):  $\delta$  8.80 (d,  $J$  = 7.2 Hz, 1H), 7.99 (d,  $J$  = 6.8 Hz, 1H), 7.85 (d,  $J$  = 6.8 Hz, 2H), 7.75 – 7.67 (m, 3H), 7.62 – 7.56 (m, 3H), 7.08 (d,  $J$  = 7.6 Hz, 1H);  $^{13}C$  NMR (100.5 MHz,  $CDCl_3$ ):  $\delta$  149.2, 148.5, 130.2, 130.0, 129.7, 129.2, 129.1, 128.5, 127.0, 126.7, 124.1, 121.7, 119.5, 115.4. ESI-MS  $[M+H]^+$   $m/z$  246.1.

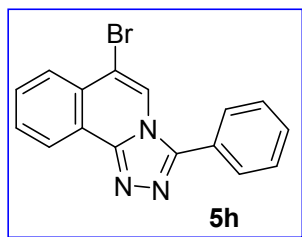

### 6-bromo-3-phenyl-[1,2,4]triazolo[3,4-*a*]isoquinoline (5h)

White solid; Yield: 88%; M.p.: 158-160 °C;  $R_f$  = 0.4 (EtOAc/hexane = 3:1);  $^1\text{H}$  NMR (400 MHz, DMSO- $d_6$ ):  $\delta$  8.64 (d,  $J$  = 7.2 Hz, 1H), 8.53 (s, 1H), 8.07 (d,  $J$  = 7.6 Hz, 1H), 7.93 – 7.85 (m, 4H), 7.65 – 7.63 (m, 3H);  $^{13}\text{C}$  NMR (100.5 MHz, DMSO- $d_6$ ):  $\delta$  148.3, 148.1, 131.5, 130.8, 130.7, 129.7, 128.9, 128.4, 127.0, 126.4, 123.9, 122.3, 121.1, 110.5. HRMS–ESI ( $m/z$ ):  $[\text{M}+\text{H}]^+$  calcd for  $\text{C}_{16}\text{H}_{11}\text{BrN}_3$ , 324.0136; found, 324.0139.

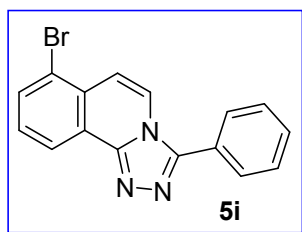

### 7-bromo-3-phenyl-[1,2,4]triazolo[3,4-*a*]isoquinoline (5i)

White solid; Yield: 84%; M.p.: 211-212 °C;  $R_f$  = 0.4 (EtOAc/hexane = 3:1);  $^1\text{H}$  NMR (400 MHz,  $\text{CDCl}_3$ ):  $\delta$  8.79 (d,  $J$  = 8.4 Hz, 1H), 8.06 (d,  $J$  = 8.0 Hz, 1H), 7.93 (d,  $J$  = 7.6 Hz, 1H), 7.85 (dd,  $J$  = 8.0, 1.6 Hz, 2H), 7.64 – 7.51 (m, 5H);  $^{13}\text{C}$  NMR (100.5 MHz,  $\text{CDCl}_3$ ):  $\delta$  148.6, 133.9, 130.4, 129.8, 129.3, 129.0, 128.5, 126.3, 123.5, 123.3, 121.9, 120.6, 114.1. HRMS–ESI ( $m/z$ ):  $[\text{M}+\text{H}]^+$  calcd for  $\text{C}_{16}\text{H}_{11}\text{BrN}_3$ , 324.0136; found, 324.0139.

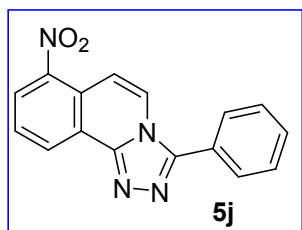

### 7-nitro-3-phenyl-[1,2,4]triazolo[3,4-*a*]isoquinoline (5j)

Yellow solid; Yield: 65%; M.p.: 237-238 °C;  $R_f = 0.38$  (EtOAc/hexane = 3:1);  $^1\text{H}$  NMR (400 MHz,  $\text{CDCl}_3$ ):  $\delta$  9.15 (d,  $J = 8.0$  Hz, 1H), 8.40 (dd,  $J = 8.0, 0.8$  Hz, 1H), 8.18 (d,  $J = 8.0$  Hz, 1H), 7.91 (d,  $J = 8.0$  Hz, 1H), 7.87 – 7.82 (m, 3H), 7.66 – 7.59 (m, 3H);  $^{13}\text{C}$  NMR (100.5 MHz,  $\text{CDCl}_3$ ):  $\delta$  149.1, 147.9, 145.8, 130.8, 129.7, 129.4, 128.6, 128.5, 126.7, 125.8, 123.6, 122.9, 122.7, 109.6. HRMS–ESI ( $m/z$ ):  $[\text{M}+\text{H}]^+$  calcd for  $\text{C}_{16}\text{H}_{11}\text{N}_4\text{O}_2$ , 291.0882; found, 291.0881.

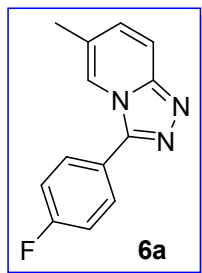

### 3-(4-fluorophenyl)-6-methyl-[1,2,4]triazolo[4,3-*a*]pyridine (6a)

White solid; Yield: 82%; M.p.: 147-148 °C;  $R_f = 0.4$  (EtOAc/hexane = 3:1);  $^1\text{H}$  NMR (400 MHz,  $\text{DMSO-}d_6$ ):  $\delta$  8.31 (s, 1H), 7.93 (dd,  $J = 8.4, 2.8$  Hz, 2H), 7.75 (d,  $J = 10.0$  Hz, 1H), 7.44 (t,  $J = 9.0$  Hz, 2H), 7.28 (d,  $J = 9.2$  Hz, 1H), 2.29 (s, 3H);  $^{13}\text{C}$  NMR (100.5 MHz,  $\text{DMSO-}d_6$ ):  $\delta$  163.3 (d,  $J_{\text{C-F}} = 247.5$  Hz), 149.7, 145.2, 131.5, 131.0 (d,  $J_{\text{C-F}} = 8.6$  Hz), 124.4, 123.7, 120.9, 116.7 (d,  $J_{\text{C-F}} = 21.8$  Hz), 115.3, 17.8. HRMS–ESI ( $m/z$ ):  $[\text{M}+\text{H}]^+$  calcd for  $\text{C}_{13}\text{H}_{11}\text{FN}_3$ , 228.0937; found, 228.0938.

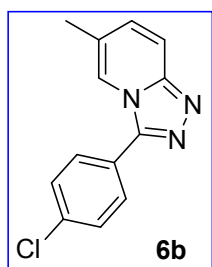

### 3-(4-chlorophenyl)-6-methyl-[1,2,4]triazolo[4,3-*a*]pyridine (6b)

White solid; Yield: 84%; M.p.: 182-183 °C;  $R_f = 0.4$  (EtOAc/hexane = 3:1);  $^1\text{H}$  NMR (400 MHz, DMSO- $d_6$ ):  $\delta$  8.35 (s, 1H), 7.91 (d,  $J = 8.4$  Hz, 2H), 7.76 (d,  $J = 9.2$  Hz, 1H), 7.66 (d,  $J = 8.4$  Hz, 2H), 7.29 (d,  $J = 9.6$  Hz, 1H), 2.29 (s, 3H);  $^{13}\text{C}$  NMR (100.5 MHz, DMSO- $d_6$ ):  $\delta$  149.9, 145.0, 134.9, 131.6, 130.2, 129.7, 126.0, 124.6, 121.0, 115.4, 17.9. HRMS–ESI ( $m/z$ ):  $[\text{M}+\text{H}]^+$  calcd for  $\text{C}_{13}\text{H}_{11}\text{ClN}_3$ , 244.0642; found, 244.0647.

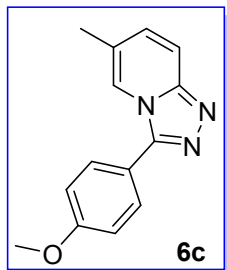

### 3-(4-methoxyphenyl)-6-methyl-[1,2,4]triazolo[4,3-*a*]pyridine (6c)

White solid; Yield: 90%; M.p.: 162-163 °C;  $R_f = 0.4$  (EtOAc/hexane = 3:1);  $^1\text{H}$  NMR (400 MHz, DMSO- $d_6$ ):  $\delta$  8.26 (s, 1H), 7.80 (d,  $J = 8.4$  Hz, 2H), 7.72 (d,  $J = 9.2$  Hz, 1H), 7.25 (d,  $J = 9.6$  Hz, 1H), 7.15 (d,  $J = 8.4$  Hz, 2H), 3.84 (s, 3H), 2.28 (s, 3H);  $^{13}\text{C}$  NMR (100.5 MHz, DMSO- $d_6$ ):  $\delta$  160.8, 149.5, 145.9, 131.2, 130.0, 124.1, 120.8, 119.4, 115.3, 115.0, 55.8, 17.9. HRMS–ESI ( $m/z$ ):  $[\text{M}+\text{H}]^+$  calcd for  $\text{C}_{14}\text{H}_{14}\text{N}_3\text{O}$ , 240.1137; found, 240.1132.

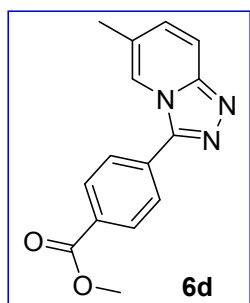

### methyl 4-(6-methyl-[1,2,4]triazolo[4,3-*a*]pyridin-3-yl)benzoate (6d)

White solid; Yield: 74%; M.p.: 207-208 °C;  $R_f = 0.38$  (EtOAc/hexane = 3:1);  $^1\text{H}$  NMR (400 MHz, DMSO- $d_6$ ):  $\delta$  8.45 (s, 1H), 8.15 (d,  $J = 8.4$  Hz, 2H), 8.07 (d,  $J = 8.4$  Hz, 2H), 7.79 (d,  $J =$

9.2 Hz, 1H), 7.33 (d,  $J = 9.2$  Hz, 1H), 3.90 (s, 3H), 2.31 (s, 3H);  $^{13}\text{C}$  NMR (100.5 MHz, DMSO- $d_6$ ):  $\delta$  166.1, 150.1, 145.1, 131.8, 131.5, 130.7, 130.3, 128.5, 124.9, 121.2, 115.4, 52.8, 17.9. HRMS–ESI ( $m/z$ ):  $[\text{M}+\text{H}]^+$  calcd for  $\text{C}_{15}\text{H}_{14}\text{N}_3\text{O}_2$ , 268.1086; found, 268.1086.

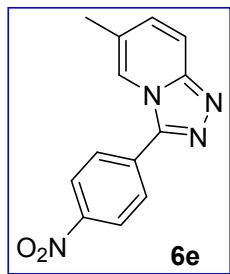

### 6-methyl-3-(4-nitrophenyl)-[1,2,4]triazolo[4,3-*a*]pyridine (6e)

Yellow solid; Yield: 62%; M.p.: 256-257 °C;  $R_f = 0.38$  (EtOAc/hexane = 3:1);  $^1\text{H}$  NMR (400 MHz, DMSO- $d_6$ ):  $\delta$  8.50 (s, 1H), 8.41 (d,  $J = 8.0$  Hz, 2H), 8.22 (d,  $J = 8.0$  Hz, 2H), 7.83 (d,  $J = 9.2$  Hz, 1H), 7.36 (d,  $J = 10.0$  Hz, 1H), 2.33 (s, 3H);  $^{13}\text{C}$  NMR (100.5 MHz, DMSO- $d_6$ ):  $\delta$  150.3, 148.1, 144.4, 133.3, 132.1, 129.3, 125.2, 124.7, 121.4, 115.4, 17.9. HRMS–ESI ( $m/z$ ):  $[\text{M}+\text{H}]^+$  calcd for  $\text{C}_{13}\text{H}_{11}\text{N}_4\text{O}_2$ , 255.0882; found, 255.0887.

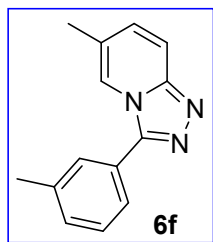

### 6-methyl-3-(*m*-tolyl)-[1,2,4]triazolo[4,3-*a*]pyridine (6f)

Colorless oil; Yield: 87%;  $R_f = 0.42$  (EtOAc/hexane = 3:1);  $^1\text{H}$  NMR (400 MHz, DMSO- $d_6$ ):  $\delta$  8.33 (s, 1H), 7.75 (d,  $J = 9.6$  Hz, 1H), 7.67 – 7.65 (m, 2H), 7.49 (t,  $J = 7.6$  Hz, 1H), 7.38 (d,  $J = 7.2$  Hz, 1H), 7.28 (d,  $J = 9.6$  Hz, 1H), 2.43 (s, 3H), 2.30 (s, 3H);  $^{13}\text{C}$  NMR (100.5 MHz, DMSO- $d_6$ ):  $\delta$  149.7, 146.0, 139.0, 131.4, 130.9, 129.5, 128.9, 127.1, 125.5, 124.4, 120.9, 115.4, 21.4, 17.9. HRMS–ESI ( $m/z$ ):  $[\text{M}+\text{Na}]^+$  calcd for  $\text{C}_{14}\text{H}_{13}\text{N}_3\text{Na}$ , 246.1007; found, 246.1009.

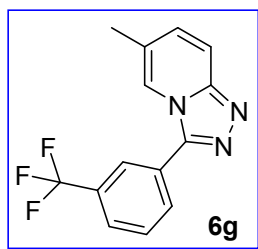

### 6-methyl-3-(3-(trifluoromethyl)phenyl)-[1,2,4]triazolo[4,3-*a*]pyridine (6g)

White solid; Yield: 75%; M.p.: 145-146 °C;  $R_f = 0.42$  (EtOAc/hexane = 3:1);  $^1\text{H}$  NMR (400 MHz, DMSO- $d_6$ ):  $\delta$  8.38 (s, 1H), 8.22 – 8.19 (m, 2H), 7.93 (d,  $J = 7.6$  Hz, 1H), 7.85 (t,  $J = 7.8$  Hz, 1H), 7.79 (d,  $J = 10.0$  Hz, 1H), 7.32 (d,  $J = 9.2$  Hz, 1H), 2.31 (s, 3H);  $^{13}\text{C}$  NMR (100.5 MHz, DMSO- $d_6$ ):  $\delta$  150.0, 144.8, 132.2, 131.9, 130.8, 130.4 (q,  $J_{\text{C-F}} = 31.9$  Hz), 128.3, 126.7 (d,  $J_{\text{C-F}} = 3.1$  Hz), 125.2 (d,  $J_{\text{C-F}} = 3.9$  Hz), 124.7, 124.3 (q,  $J_{\text{C-F}} = 272.5$  Hz), 121.1, 115.3, 17.9. HRMS–ESI ( $m/z$ ):  $[\text{M}+\text{H}]^+$  calcd for  $\text{C}_{14}\text{H}_{11}\text{F}_3\text{N}_3$ , 278.0905; found, 278.0904.

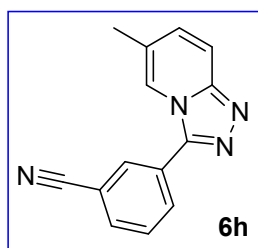

### 3-(6-methyl-[1,2,4]triazolo[4,3-*a*]pyridin-3-yl)benzonitrile (6h)

White solid; Yield: 73%; M.p.: 212-213 °C;  $R_f = 0.4$  (EtOAc/hexane = 3:1);  $^1\text{H}$  NMR (400 MHz, DMSO- $d_6$ ):  $\delta$  8.47 (s, 1H), 8.35 (s, 1H), 8.23 (d,  $J = 7.6$  Hz, 1H), 8.03 (d,  $J = 7.6$  Hz, 1H), 7.82 – 7.77 (m, 2H), 7.33 (d,  $J = 9.6$  Hz, 1H), 2.32 (s, 3H);  $^{13}\text{C}$  NMR (100.5 MHz, DMSO- $d_6$ ):  $\delta$  150.0, 144.4, 133.7, 133.2, 131.9, 131.6, 130.8, 128.4, 124.8, 121.3, 118.7, 115.3, 112.8, 17.8. HRMS–ESI ( $m/z$ ):  $[\text{M}+\text{Na}]^+$  calcd for  $\text{C}_{14}\text{H}_{10}\text{N}_4\text{Na}$ , 257.0803; found, 257.0805.

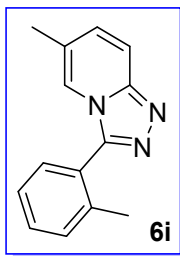

### 6-methyl-3-(o-tolyl)-[1,2,4]triazolo[4,3-a]pyridine (6i)

Colorless oil; Yield: 92%;  $R_f = 0.42$  (EtOAc/hexane = 3:1);  $^1\text{H NMR}$  (400 MHz,  $\text{DMSO-}d_6$ ):  $\delta$  7.81 (s, 1H), 7.75 (d,  $J = 9.6$  Hz, 1H), 7.53 – 7.46 (m, 3H), 7.40 (t,  $J = 7.0$  Hz, 1H), 7.27 (d,  $J = 9.2$  Hz, 1H), 2.24 (s, 3H), 2.15 (s, 3H);  $^{13}\text{C NMR}$  (100.5 MHz,  $\text{DMSO-}d_6$ ):  $\delta$  149.0, 145.5, 138.4, 131.5, 131.3, 130.7, 126.7, 126.4, 124.3, 120.6, 115.3, 19.8, 17.7. HRMS–ESI ( $m/z$ ):  $[\text{M}+\text{Na}]^+$  calcd for  $\text{C}_{14}\text{H}_{13}\text{N}_3\text{Na}$ , 246.1007; found, 246.1008.

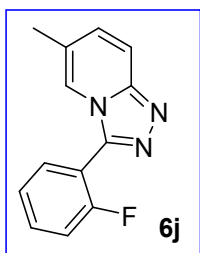

### 3-(2-fluorophenyl)-6-methyl-[1,2,4]triazolo[4,3-a]pyridine (6j)

White solid; Yield: 87%; M.p.: 124–125 °C;  $R_f = 0.42$  (EtOAc/hexane = 3:1);  $^1\text{H NMR}$  (400 MHz,  $\text{DMSO-}d_6$ ):  $\delta$  8.02 (s, 1H), 7.80 – 7.74 (m, 2H), 7.72 – 7.67 (m, 1H), 7.52 – 7.43 (m, 2H), 7.32 (d,  $J = 9.2$  Hz, 1H), 2.28 (s, 3H);  $^{13}\text{C NMR}$  (100.5 MHz,  $\text{DMSO-}d_6$ ):  $\delta$  160.0 (d,  $J_{\text{C-F}} = 249.1$  Hz), 149.7, 141.8, 133.2 (d,  $J_{\text{C-F}} = 7.7$  Hz), 132.4, 131.8, 125.7, 124.5, 121.3, 116.9 (d,  $J_{\text{C-F}} = 21.0$  Hz), 115.2, 114.9 (d,  $J_{\text{C-F}} = 14.7$  Hz), 17.7. HRMS–ESI ( $m/z$ ):  $[\text{M}+\text{H}]^+$  calcd for  $\text{C}_{13}\text{H}_{11}\text{FN}_3$ , 228.0937; found, 228.0938.

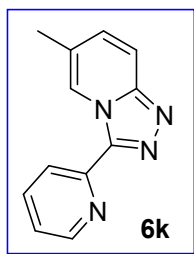

### 6-methyl-3-(pyridin-2-yl)-[1,2,4]triazolo[4,3-a]pyridine (6k)

White solid; Yield: 80%; M.p.: 174-175 °C;  $R_f = 0.32$  (EtOAc/hexane = 3:1);  $^1\text{H NMR}$  (400 MHz, DMSO- $d_6$ ):  $\delta$  9.48 (s, 1H), 8.79 – 8.78 (m, 1H), 8.36 (d,  $J = 8.0$  Hz, 1H), 8.02 (t,  $J = 7.6$  Hz, 1H), 7.84 (d,  $J = 9.2$  Hz, 1H), 7.51 (t,  $J = 6.2$  Hz, 1H), 7.38 (d,  $J = 9.2$  Hz, 1H), 2.36 (s, 3H);  $^{13}\text{C NMR}$  (100.5 MHz, DMSO- $d_6$ ):  $\delta$  150.3, 149.4, 148.2, 143.7, 138.0, 132.0, 124.7, 124.3, 123.8, 122.3, 115.2, 18.2. HRMS–ESI ( $m/z$ ):  $[\text{M}+\text{H}]^+$  calcd for  $\text{C}_{12}\text{H}_{11}\text{N}_4$ , 211.0984; found, 211.0986.

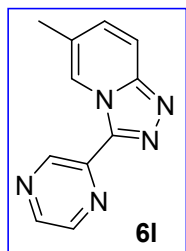

### 6-methyl-3-(pyrazin-2-yl)-[1,2,4]triazolo[4,3-a]pyridine (6l)

White solid; Yield: 85%; M.p.: 184-185 °C;  $R_f = 0.32$  (EtOAc/hexane = 3:1);  $^1\text{H NMR}$  (400 MHz, DMSO- $d_6$ ):  $\delta$  9.54 (s, 1H), 9.30 (s, 1H), 8.82 (s, 1H), 8.73 (s, 1H), 7.89 (d,  $J = 8.8$  Hz, 1H), 7.43 (d,  $J = 9.6$  Hz, 1H), 2.37 (s, 3H);  $^{13}\text{C NMR}$  (100.5 MHz, DMSO- $d_6$ ):  $\delta$  150.5, 144.4, 144.0, 143.8, 143.5, 141.9, 132.5, 125.4, 123.5, 115.4, 18.2. HRMS–ESI ( $m/z$ ):  $[\text{M}+\text{Na}]^+$  calcd for  $\text{C}_{11}\text{H}_9\text{N}_5\text{Na}$ , 234.0756; found, 234.0756.



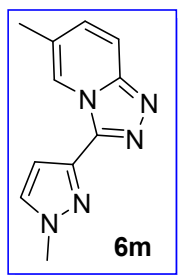

**6-methyl-3-(1-methyl-1H-pyrazol-3-yl)-[1,2,4]triazolo[4,3-*a*]pyridine (6m)**

White solid; Yield: 75%; M.p.: 167-169 °C;  $R_f = 0.3$  (EtOAc/hexane = 3:1);  $^1\text{H NMR}$  (400 MHz, DMSO- $d_6$ ):  $\delta$  8.97 (s, 1H), 7.93 (s, 1H), 7.75 (d,  $J = 9.2$  Hz, 1H), 7.30 (d,  $J = 9.6$  Hz, 1H), 6.91 (s, 1H), 4.01 (s, 3H), 2.34 (s, 3H);  $^{13}\text{C NMR}$  (100.5 MHz, DMSO- $d_6$ ):  $\delta$  149.2, 140.7, 140.7, 132.9, 131.4, 124.3, 122.6, 115.1, 105.3, 39.4, 18.1. HRMS-ESI ( $m/z$ ):  $[\text{M}+\text{Na}]^+$  calcd for  $\text{C}_{11}\text{H}_{11}\text{N}_5\text{Na}$ , 236.0912; found, 236.0918.

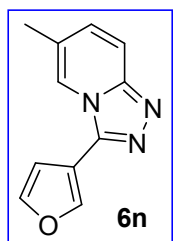

**3-(furan-3-yl)-6-methyl-[1,2,4]triazolo[4,3-*a*]pyridine (6n)**

White solid; Yield: 77%; M.p.: 186-187 °C;  $R_f = 0.36$  (EtOAc/hexane = 3:1);  $^1\text{H NMR}$  (400 MHz, DMSO- $d_6$ ):  $\delta$  8.64 (s, 1H), 8.33 (s, 1H), 7.94 (s, 1H), 7.74 (d,  $J = 9.6$  Hz, 1H), 7.28 (d,  $J = 9.6$  Hz, 1H), 7.13 (s, 1H), 2.34 (s, 3H);  $^{13}\text{C NMR}$  (100.5 MHz, DMSO- $d_6$ ):  $\delta$  149.4, 144.9, 141.6, 140.1, 131.2, 124.6, 121.4, 115.3, 113.4, 109.9, 17.8. HRMS-ESI ( $m/z$ ):  $[\text{M}+\text{Na}]^+$  calcd for  $\text{C}_{11}\text{H}_9\text{N}_3\text{NaO}$ , 222.0643; found, 222.0641.

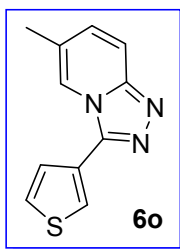

### 6-methyl-3-(thiophen-3-yl)-[1,2,4]triazolo[4,3-a]pyridine (6o)

White solid; Yield: 83%; M.p.: 199-200 °C;  $R_f = 0.36$  (EtOAc/hexane = 3:1);  $^1\text{H NMR}$  (400 MHz,  $\text{DMSO-}d_6$ ):  $\delta$  8.44 (s, 1H), 8.33 (d,  $J = 1.2$  Hz, 1H), 7.82 (dd,  $J = 4.8, 2.0$  Hz, 1H), 7.76 – 7.72 (m, 2H), 7.28 (d,  $J = 9.2$  Hz, 1H), 2.33 (s, 3H);  $^{13}\text{C NMR}$  (100.5 MHz,  $\text{DMSO-}d_6$ ):  $\delta$  149.4, 142.6, 131.3, 128.0, 127.7, 127.5, 125.3, 124.6, 121.3, 115.3, 17.9. HRMS–ESI ( $m/z$ ):  $[\text{M}+\text{H}]^+$  calcd for  $\text{C}_{11}\text{H}_{10}\text{N}_3\text{S}$ , 216.0595; found, 216.0596.

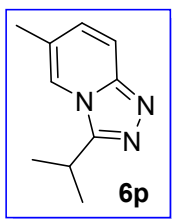

### 3-isopropyl-6-methyl-[1,2,4]triazolo[4,3-a]pyridine (6p)

White solid; Yield: 50%; M.p.: 111-113 °C;  $R_f = 0.2$  (EtOAc/hexane = 3:1);  $^1\text{H NMR}$  (400 MHz,  $\text{DMSO-}d_6$ ):  $\delta$  8.23 (s, 1H), 7.60 (d,  $J = 9.2$  Hz, 1H), 7.17 (d,  $J = 9.6$  Hz, 1H), 3.47 (heptet,  $J = 6.8$  Hz, 1H), 2.28 (s, 3H), 1.36 (d,  $J = 6.8$  Hz, 6H);  $^{13}\text{C NMR}$  (100.5 MHz,  $\text{DMSO-}d_6$ ):  $\delta$  150.9, 148.9, 130.7, 123.0, 120.8, 115.1, 24.5, 20.6, 17.8. HRMS–ESI ( $m/z$ ):  $[\text{M}+\text{H}]^+$  calcd for  $\text{C}_{10}\text{H}_{14}\text{N}_3$ , 176.1188; found, 176.1182.

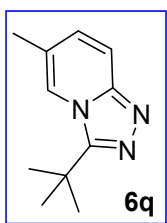

### 3-(tert-butyl)-6-methyl-[1,2,4]triazolo[4,3-*a*]pyridine (6q)

White solid; Yield: 60%; M.p.: 102-103 °C;  $R_f = 0.2$  (EtOAc/hexane = 3:1);  $^1\text{H NMR}$  (400 MHz, DMSO- $d_6$ ):  $\delta$  8.38 (s, 1H), 7.62 (d,  $J = 9.6$  Hz, 1H), 7.15 (d,  $J = 9.2$  Hz, 1H), 2.30 (s, 3H), 1.49 (s, 9H);  $^{13}\text{C NMR}$  (100.5 MHz, DMSO- $d_6$ ):  $\delta$  152.4, 150.0, 130.3, 123.1, 122.2, 115.6, 32.5, 27.9, 17.8. HRMS-ESI ( $m/z$ ):  $[\text{M}+\text{Na}]^+$  calcd for  $\text{C}_{11}\text{H}_{15}\text{N}_3\text{Na}$ , 212.1164; found, 212.1166.

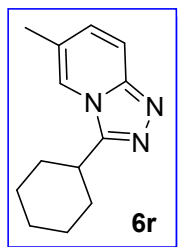

### 3-cyclohexyl-6-methyl-[1,2,4]triazolo[4,3-*a*]pyridine (6r)

White solid; Yield: 47%; M.p.: 133-135 °C;  $R_f = 0.24$  (EtOAc/hexane = 3:1);  $^1\text{H NMR}$  (400 MHz, DMSO- $d_6$ ):  $\delta$  8.26 (s, 1H), 7.59 (d,  $J = 9.2$  Hz, 1H), 7.16 (d,  $J = 9.6$  Hz, 1H), 3.20 – 3.14 (m, 1H), 2.27 (s, 3H), 1.99 – 1.96 (m, 2H), 1.83 – 1.79 (m, 2H), 1.74 – 1.70 (m, 1H), 1.67 – 1.57 (m, 2H), 1.50 – 1.41 (m, 2H), 1.35 – 1.29 (m, 1H);  $^{13}\text{C NMR}$  (100.5 MHz, DMSO- $d_6$ ):  $\delta$  150.2, 148.7, 130.6, 122.9, 120.8, 115.1, 33.5, 30.6, 25.9, 25.9, 17.8. HRMS-ESI ( $m/z$ ):  $[\text{M}+\text{H}]^+$  calcd for  $\text{C}_{13}\text{H}_{18}\text{N}_3$ , 216.1501; found, 216.1507.

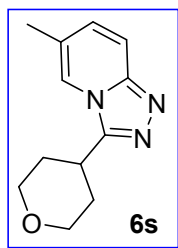

### 6-methyl-3-(tetrahydro-2*H*-pyran-4-yl)-[1,2,4]triazolo[4,3-*a*]pyridine (6s)

White solid; Yield: 40%; M.p.: 165-167 °C;  $R_f = 0.22$  (EtOAc/hexane = 3:1);  $^1\text{H NMR}$  (400 MHz, DMSO- $d_6$ ):  $\delta$  8.33 (s, 1H), 7.62 (d,  $J = 9.2$  Hz, 1H), 7.19 (d,  $J = 9.2$  Hz, 1H), 3.95 (d,  $J =$

10.8 Hz, 2H), 3.52 (td,  $J = 11.3, 2.3$  Hz, 2H), 3.48 – 3.32 (m, 1H), 2.28 (s, 3H), 1.93 – 1.80 (m, 4H);  $^{13}\text{C}$  NMR (100.5 MHz,  $\text{DMSO-}d_6$ ):  $\delta$  149.1, 148.7, 131.0, 123.1, 120.9, 115.0, 67.0, 30.8, 30.3, 17.8. HRMS–ESI ( $m/z$ ):  $[\text{M}+\text{H}]^+$  calcd for  $\text{C}_{12}\text{H}_{16}\text{N}_3\text{O}$ , 218.1293; found, 218.1296.

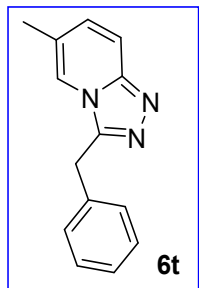

### 3-benzyl-6-methyl-[1,2,4]triazolo[4,3-a]pyridine (6t)

White solid; Yield: 30%; M.p.: 158-160 °C;  $R_f = 0.28$  (EtOAc/hexane = 3:1);  $^1\text{H}$  NMR (400 MHz,  $\text{DMSO-}d_6$ ):  $\delta$  8.16 (s, 1H), 7.63 (d,  $J = 9.2$  Hz, 1H), 7.31 – 7.26 (m, 4H), 7.22 – 7.17 (m, 2H), 4.48 (s, 2H), 2.23 (s, 3H);  $^{13}\text{C}$  NMR (100.5 MHz,  $\text{DMSO-}d_6$ ):  $\delta$  148.9, 145.6, 136.4, 131.1, 129.0, 128.9, 127.2, 123.4, 120.7, 115.0, 30.0, 17.8. HRMS–ESI ( $m/z$ ):  $[\text{M}+\text{H}]^+$  calcd for  $\text{C}_{14}\text{H}_{14}\text{N}_3$ , 224.1188; found, 224.1189.

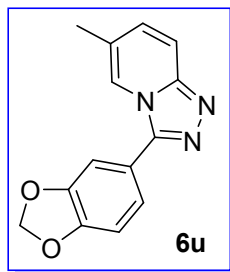

### 3-(benzo[d][1,3]dioxol-5-yl)-6-methyl-[1,2,4]triazolo[4,3-a]pyridine (6u)

White solid; Yield: 82%; M.p.: 158-160 °C;  $R_f = 0.38$  (EtOAc/hexane = 3:1);  $^1\text{H}$  NMR (400 MHz,  $\text{DMSO-}d_6$ ):  $\delta$  8.27 (s, 1H), 7.72 (d,  $J = 9.6$  Hz, 1H), 7.39 (s, 1H), 7.35 (d,  $J = 8.0$  Hz, 1H), 7.25 (d,  $J = 9.2$  Hz, 1H), 7.13 (d,  $J = 8.0$  Hz, 1H), 6.14 (s, 2H), 2.28 (s, 3H);  $^{13}\text{C}$  NMR (100.5 MHz,  $\text{DMSO-}d_6$ ):  $\delta$  149.6, 149.0, 148.3, 145.8, 131.3, 124.2, 122.9, 120.9, 120.7, 115.3, 109.4,

108.8, 102.1, 17.8. HRMS–ESI ( $m/z$ ):  $[M+H]^+$  calcd for  $C_{14}H_{12}N_3O_2$ , 254.0930; found, 254.0932.

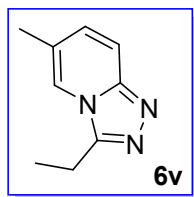

### 3-ethyl-6-methyl-[1,2,4]triazolo[4,3-a]pyridine (6v)

White solid; Yield: 45%; M.p.: 76-78 °C;  $R_f$  = 0.22 (EtOAc/hexane = 3:1);  $^1H$  NMR (400 MHz,  $CDCl_3$ ):  $\delta$  7.60 (s, 1H), 7.57 (d,  $J$  = 9.2 Hz, 1H), 7.02 (d,  $J$  = 9.2 Hz, 1H), 3.01 (q,  $J$  = 7.6 Hz, 2H), 2.29 (s, 3H), 1.44 (t,  $J$  = 7.6 Hz, 3H);  $^{13}C$  NMR (100.5 MHz,  $CDCl_3$ ):  $\delta$  149.2, 147.2, 129.9, 123.2, 118.8, 115.7, 18.1, 10.8. HRMS–ESI ( $m/z$ ):  $[M+Na]^+$  calcd for  $C_9H_{11}N_3Na$ , 184.0851; found, 184.0850.

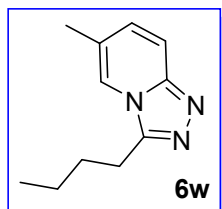

### 3-butyl-6-methyl-[1,2,4]triazolo[4,3-a]pyridine (6w)

Colorless oil; Yield: 52%;  $R_f$  = 0.22 (EtOAc/hexane = 3:1);  $^1H$  NMR (400 MHz,  $CDCl_3$ ):  $\delta$  7.61 (s, 1H), 7.57 (d,  $J$  = 10 Hz, 1H), 7.02 (d,  $J$  = 9.2 Hz, 1H), 2.99 (t,  $J$  = 7.8 Hz, 2H), 2.30 (s, 3H), 1.83 (quint,  $J$  = 7.2 Hz, 2H), 1.43 (sext,  $J$  = 7.2 Hz, 2H), 0.93 (t,  $J$  = 7.2 Hz, 3H);  $^{13}C$  NMR (100.5 MHz,  $CDCl_3$ ):  $\delta$  149.1, 146.4, 129.9, 123.2, 118.9, 115.7, 28.5, 24.2, 22.3, 18.1, 13.6. HRMS–ESI ( $m/z$ ):  $[M+Na]^+$  calcd for  $C_{11}H_{15}N_3Na$ , 212.1164; found, 212.1164.

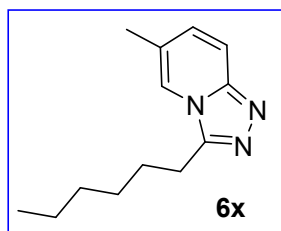

### 3-hexyl-6-methyl-[1,2,4]triazolo[4,3-*a*]pyridine (6x)

Colorless oil; Yield: 59%;  $R_f$  = 0.22 (EtOAc/hexane = 3:1);  $^1\text{H}$  NMR (400 MHz,  $\text{CDCl}_3$ ):  $\delta$  7.64 – 7.62 (m, 2H), 7.06 (d,  $J$  = 10 Hz, 1H), 3.03 (t,  $J$  = 7.2 Hz, 2H), 2.34 (s, 3H), 1.89 (quint,  $J$  = 7.2 Hz, 2H), 1.47 – 1.42 (m, 2H), 1.34 – 1.33 (m, 4H), 0.89 (t,  $J$  = 7.2 Hz, 3H);  $^{13}\text{C}$  NMR (100.5 MHz,  $\text{CDCl}_3$ ):  $\delta$  149.2, 146.4, 129.8, 123.2, 118.9, 115.8, 31.3, 28.9, 26.4, 24.6, 22.4, 18.1, 13.9. HRMS–ESI ( $m/z$ ):  $[\text{M}+\text{Na}]^+$  calcd for  $\text{C}_{13}\text{H}_{19}\text{N}_3\text{Na}$ , 240.1477; found, 240.1479.

### References:

- (1) J. Robin Fulton, V. K. Aggarwal and J. de Vicente, *Eur. J. Org. Chem.*, 2005, **8**, 1479.
- (2) O. R. Thiel, M. M. Achmatowicz, A. Reichelt and R. D. Larsen, *Angew. Chem., Int. Ed.*, 2010, **49**, 8395.
- (3) S. Ito, Y. Tanaka, A. Kakehi and H. Miyazawa, *Bull. Chem. Soc. Jap.*, 1977, **50**, 2969.
- (4) K. T. Potts and H. R. Burton, *J. Org. Chem.*, 1966, **31**, 3522.
- (5) Y. Wang, K. Sarris, D. R. Sauer and S. W. Djuric, *Tetrahedron Lett.*, 2007, **48**, 2237.
- (6) M. A. Schmidt and X. Qian, *Tetrahedron Lett.*, 2013, **54**, 5721.
- (7) Cantegril, Richard et al Eur. Pat. Appl., 483027, 29 Apr 1992.
- (8) A. K. Sadana, Y. Mirza, K. R. Aneja and O. Prakash, *Eur. J. Med. Chem.*, 2003, **38**, 533.

### Crystal preparation and X-ray crystal structure of compound **3h**.

Compound **3h** (2.5 mg) was dissolved in a mixture of 0.8 mL/0.2 mL of Methanol/Dichloromethane, and it was crystallized to give crystal as colorless prisms after the solvent was slowly volatilized in 2 days at room temperature (~ 25 °C). Structure of **3h** was identified by X-ray diffraction analysis (see Figure S1).

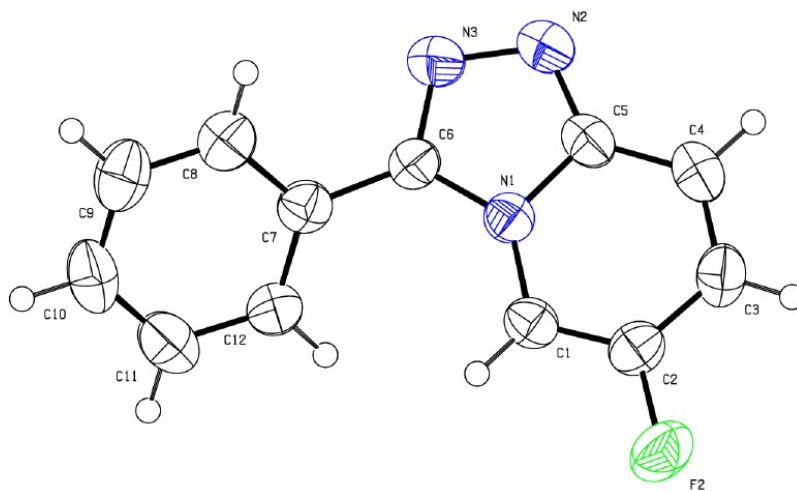

**Figure S1.** ORTEP X-Ray crystal Structure display of **3h** (CCDC No. 1487670); ellipsoids drawn at 50% probability level

### Crystal preparation and X-ray crystal structure of compound **6k**.

Compound **6k** (2.5 mg) was dissolved in a mixture of 0.8 mL/0.2 mL of Methanol/Dichloromethane, and it was crystallized to give crystal as colorless prisms after the solvent was slowly volatilized in 2 days at room temperature (~ 25 °C). Structure of **6k** was identified by X-ray diffraction analysis (see Figure S2).

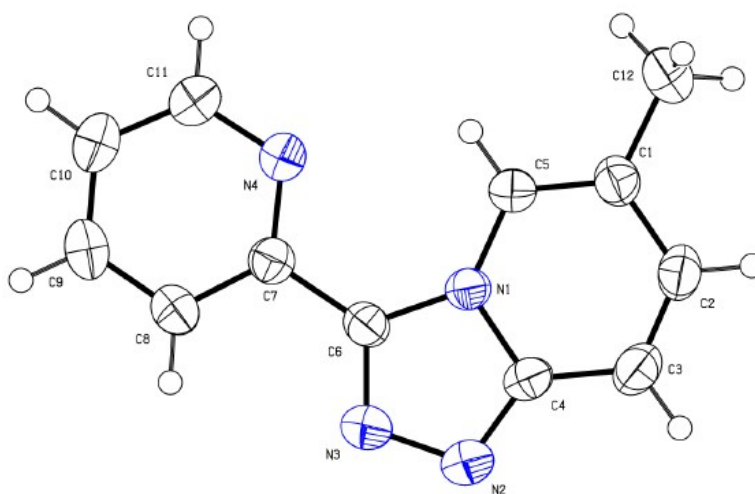

**Figure S2.** ORTEP X-Ray crystal Structure display of **6k** (CCDC No. 1487669); ellipsoids drawn at 50% probability level
