# Supplementary material for: I2-TBHP-catalyzed one-pot highly efficient synthesis of 4,3-fused 1,2,4-triazoles from N-tosylhydrazones and aromatic N-heterocycles via intermolecular formal 1,3-dipolar cycloaddition
Source: Royal Society of Chemistry journal article supplement (doi:10.1039/c6ob01926a), 2016-01-01
Supplement: c6ob01926a2.pdf [file c6ob01926a2.pdf]

## Electronic supplementary information for

### **I<sub>2</sub>-TBHP-catalyzed one-pot highly efficient synthesis of 4,3-fused 1,2,4-triazoles from *N*-tosylhydrazones and aromatic *N*-heterocycles via intermolecular formal 1,3-dipolar cycloaddition**

Surendra Babu Inturi,<sup>a,b</sup> Biswajit Kalita<sup>\*a</sup> and A. Jafar Ahamed<sup>\*b</sup>

<sup>a</sup>*Medicinal Chemistry Division, Jubilant Biosys Ltd, #96, Industrial Suburb, 2nd Stage, Yeshwanthpur, Bangalore 560022, Karnataka, India.*

<sup>b</sup>*Post Graduate and Research Department of Chemistry, Jamal Mohamed College (Autonomous), affiliated to Bharathidasan University, Tiruchirappalli - 620020, Tamil Nadu, India.*

*\*Corresponding authors. Tel.: +91-80-6662-8645.  
E-mail address: biswajit\_kalita@jubilantbiosys.com  
E-mail address: agjafar@yahoo.co.in*

#### **Table of contents**

|                                                                                                         |        |
|---------------------------------------------------------------------------------------------------------|--------|
| The <sup>1</sup> H and <sup>13</sup> C NMR spectra of compounds <b>3a-l</b> , <b>3o-q</b> , <b>5a-j</b> | S2-S51 |
|---------------------------------------------------------------------------------------------------------|--------|

# <sup>1</sup>H and <sup>13</sup>C NMR Spectra of compounds 3a-l, 3o-q, 5a-j:

NUCLEUS : H1  
FREQ (MHz) : 399.63  
AT (sec) : 2.27  
SW (ppm) : 18.08  
RD (sec) : 1.00  
DW (usec) : 6.60  
Scans : 64  
Solvent : cdcl3  
Data Points : 32768  
LB (Hz) : 1.00  
TEMP (K) : 303.15  
EXP : s2pul  
DATE : Nov 4 2015  
System : VNMR5\_400

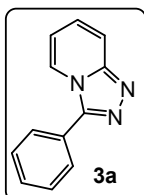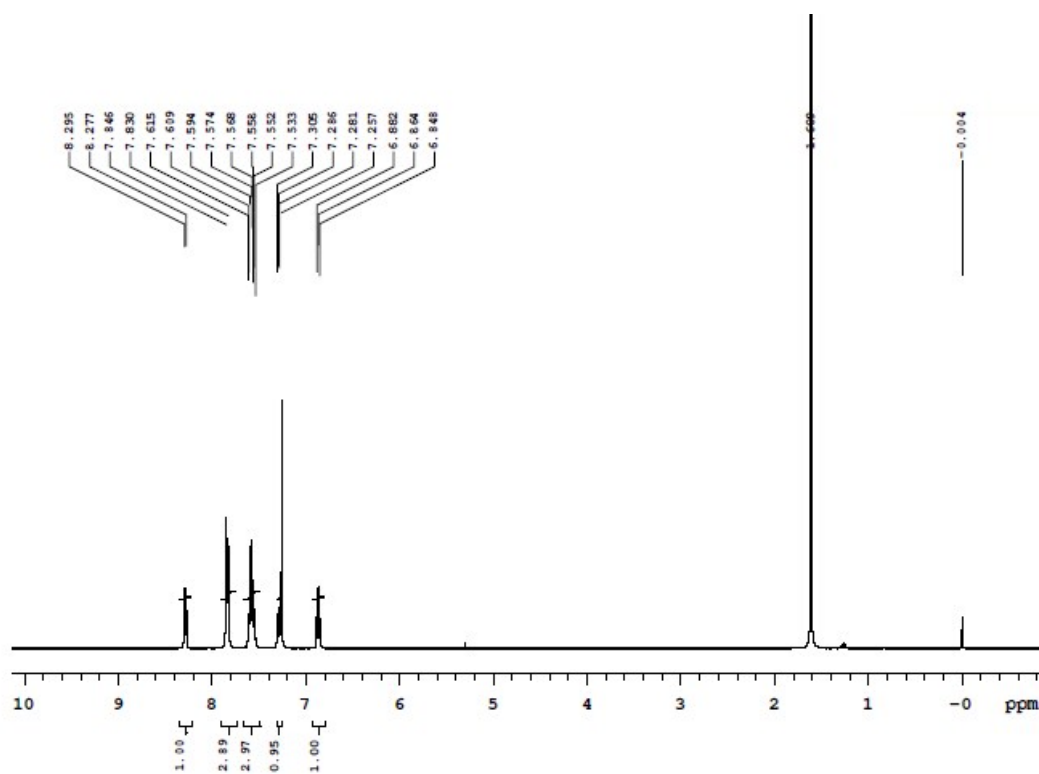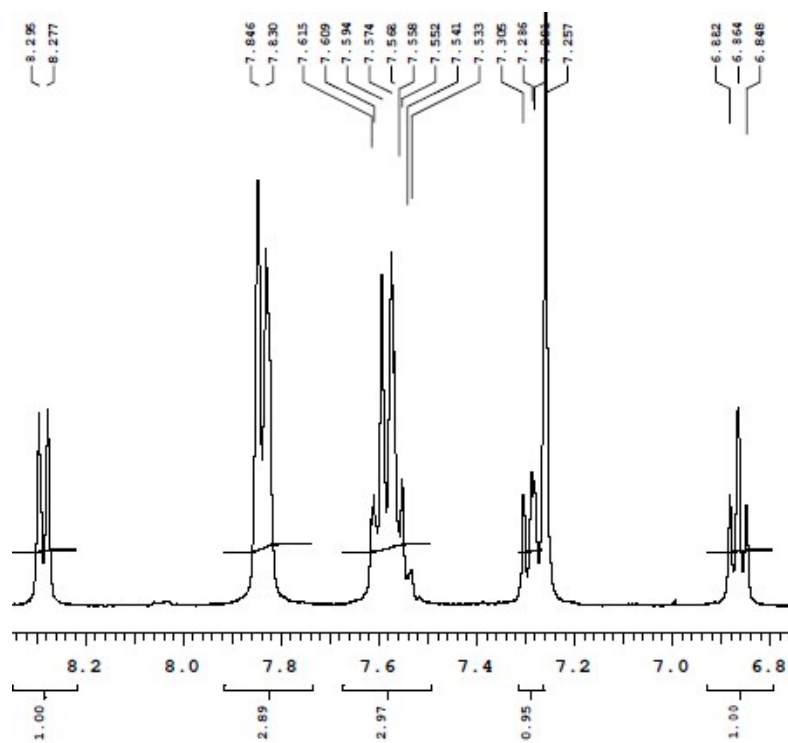

**Figure S3.** <sup>1</sup>H NMR Spectra & its expansion for compound 3a in CDCl<sub>3</sub>

NUCLEUS : C13  
FRQ (MHz) : 100.50  
AT (sec) : 1.28  
SW (ppm) : 253.84  
RE (sec) : 1.00  
DW (usec) : 5.05  
Scans : 1500  
Solvent : cdcl3  
Data Points : 65536  
LB (Hz) : 4.00  
TEMP (K) : 303.15  
EXP : s2pul  
DATE : Nov 20 2015  
System : VNMRB\_400

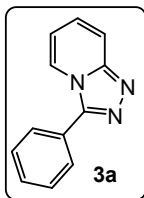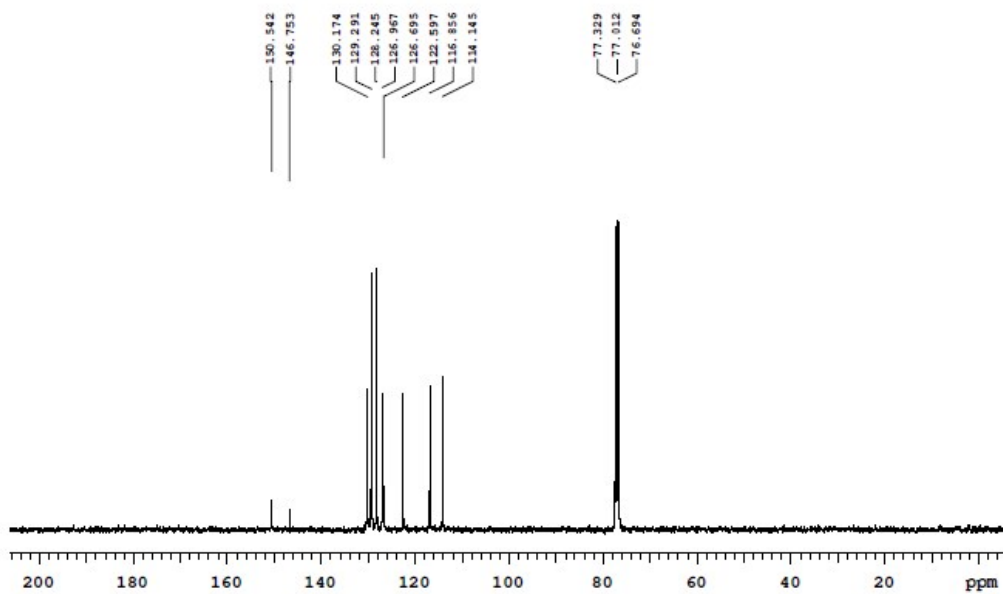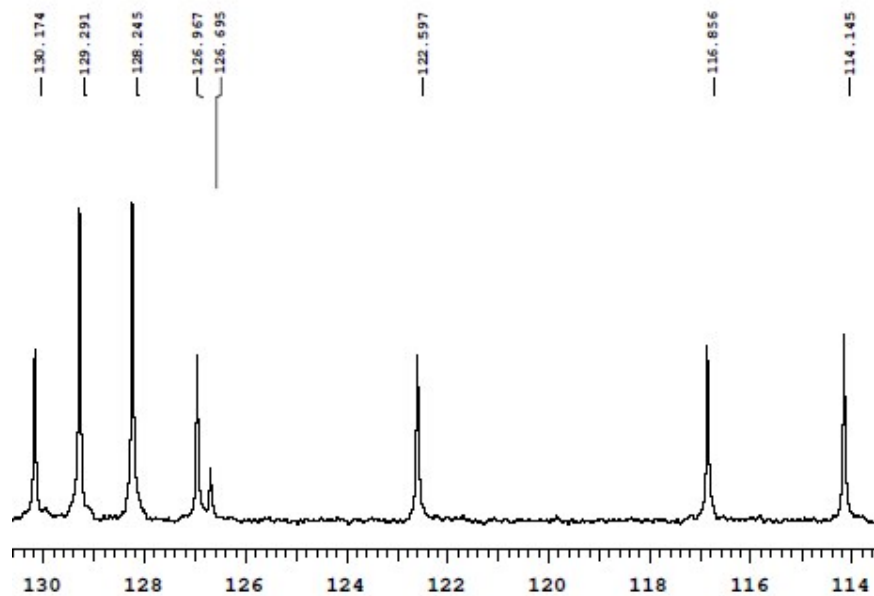

**Figure S4.**  $^{13}\text{C}$  NMR Spectra & its expansion for compound **3a** in  $\text{CDCl}_3$

NUCLEUS : H1  
 FRQ (MHz) : 399.63  
 AT (sec) : 2.27  
 SW (ppm) : 18.08  
 RD (sec) : 1.00  
 PW (usec) : 6.60  
 Scans : 64  
 Solvent : cdcl3  
 Data Points : 32768  
 LB (Hz) : 2.00  
 TEMP (K) : 303.15  
 EXP : s2pul  
 DATE : Nov 9 2015  
 System : VNMR5\_400

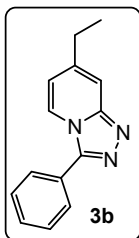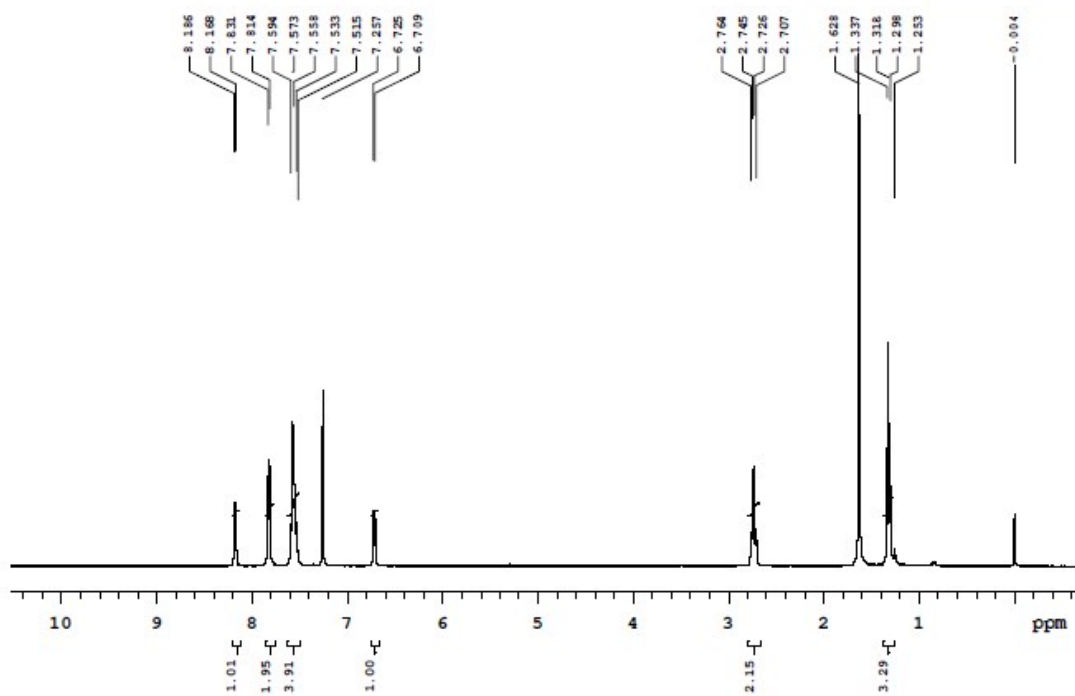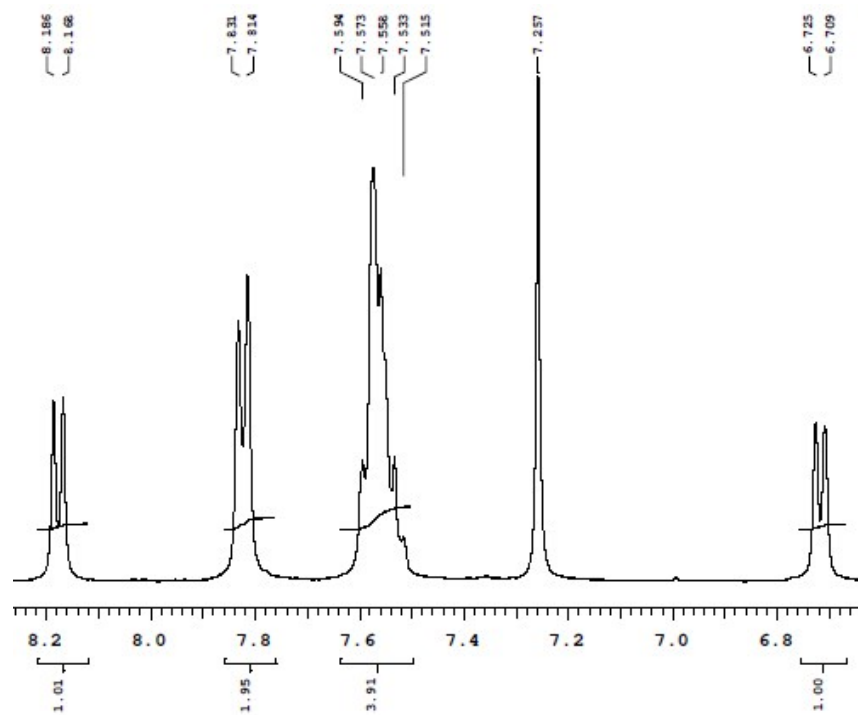

**Figure S5.**  $^1\text{H}$  NMR Spectra & its expansion for compound **3b** in  $\text{CDCl}_3$

NUCLEUS : C13  
FRQ (MHz) : 100.50  
AT (sec) : 1.28  
SW (ppm) : 253.84  
RD (sec) : 1.00  
PW (usec) : 5.05  
Scans : 1500  
Solvent : cdd13  
Data Points : 65536  
LB (Hz) : 5.00  
TEMP (K) : 303.15  
EXP : s2pul  
DATE : Nov 21 2015  
System : VNMR\_400

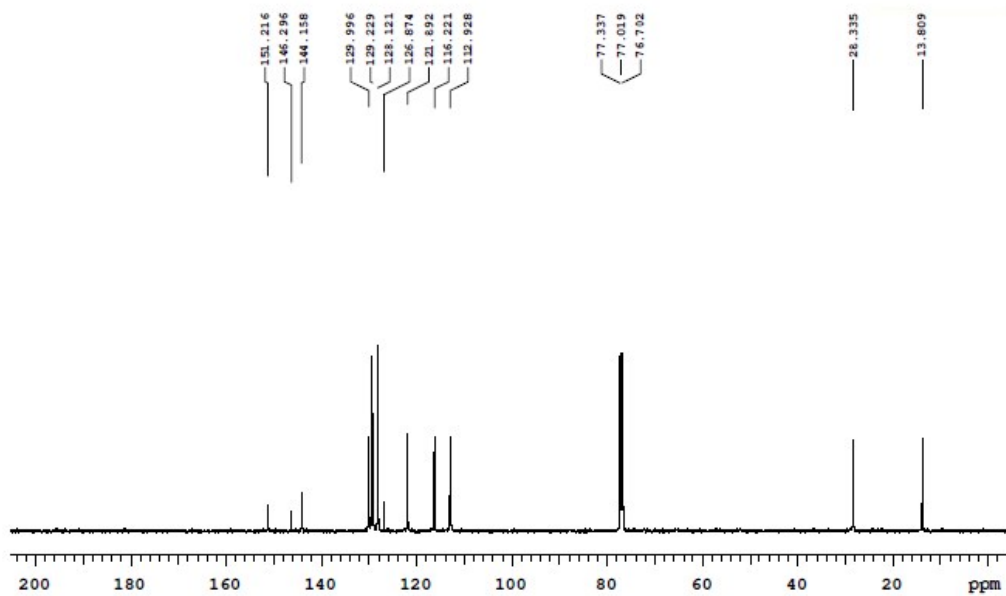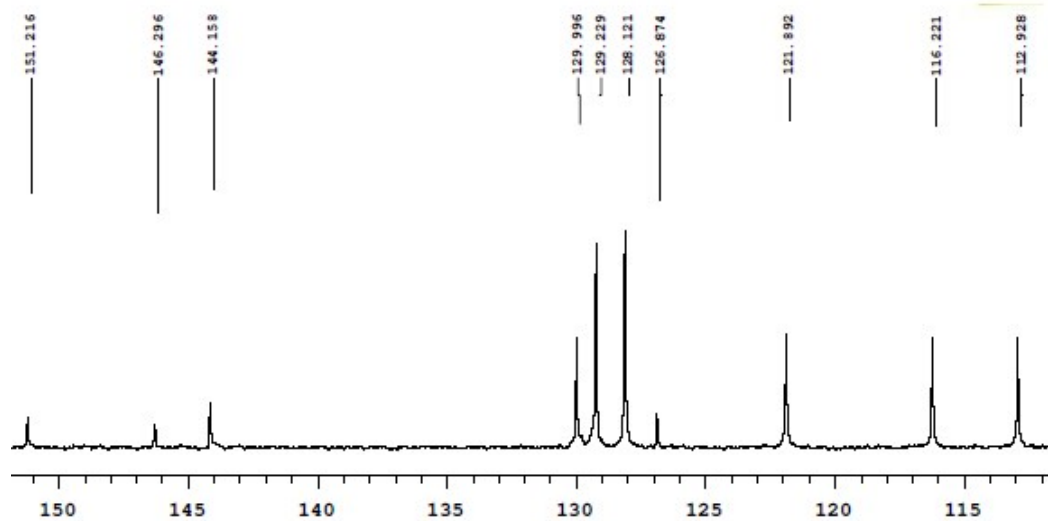

Figure S6.  $^{13}\text{C}$  NMR Spectra & its expansion for compound **3b** in  $\text{CDCl}_3$

NUCLEUS : H1  
 FREQ (MHz) : 399.63  
 AT (sec) : 2.27  
 SW (ppm) : 18.08  
 RD (sec) : 1.00  
 PW (usec) : 6.40  
 Scans : 32  
 Solvent : cdcl3  
 Data Points : 32768  
 LB (Hz) : 2.00  
 TEMP (K) : 303.15  
 EXP : sfp1  
 DATE : Dec 29 2015  
 System : VNMR5\_400

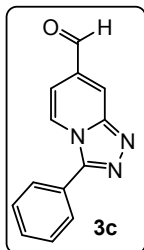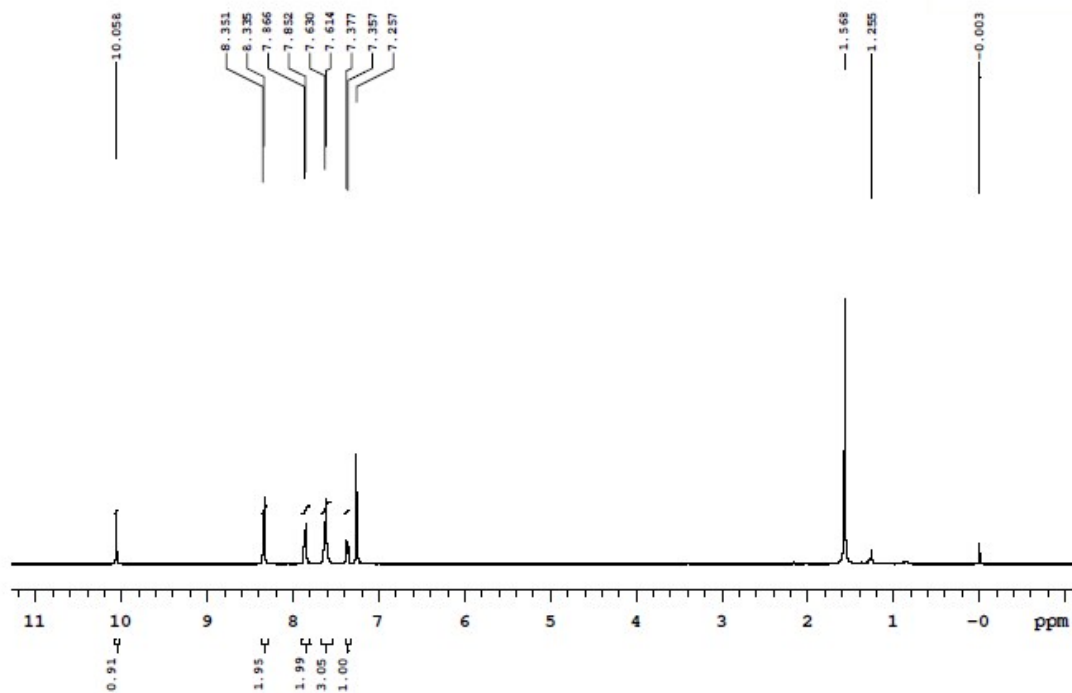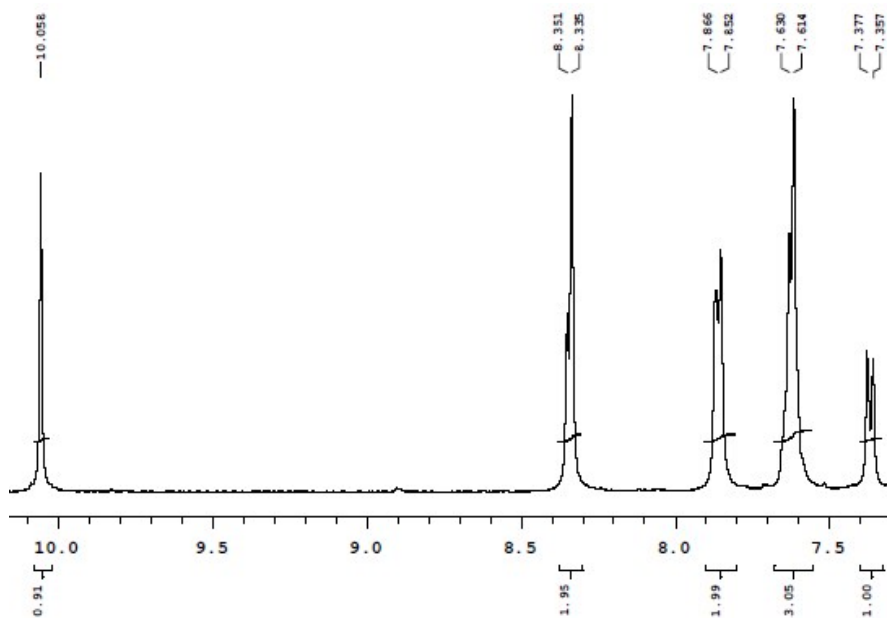

Figure S7.  $^1\text{H}$  NMR Spectra & its expansion for compound **3c** in  $\text{CDCl}_3$

NUCLEUS : C13  
 FREQ (MHz) : 100.50  
 AT (sec) : 1.28  
 SW (ppm) : 253.84  
 RD (sec) : 1.00  
 DW (usec) : 5.05  
 Scans : 4000  
 Solvent : cdcl3  
 Data Points : 65536  
 LB (Hz) : 2.00  
 TEMP (K) : 303.15  
 EXP : #2pul  
 DATE : Oct 2 2015  
 System : VNMRB\_400

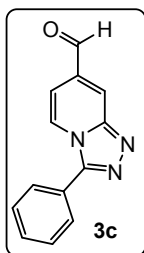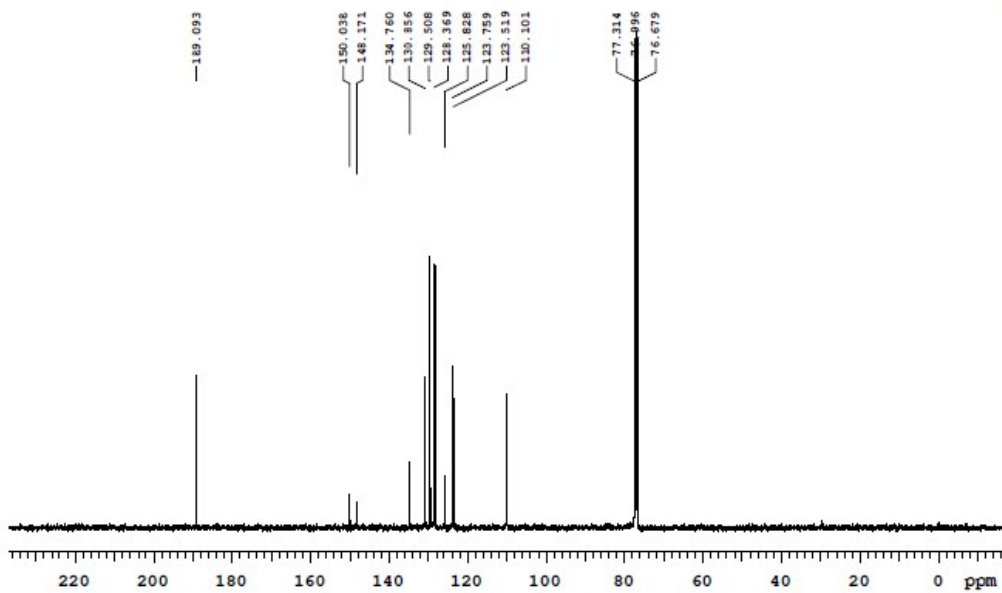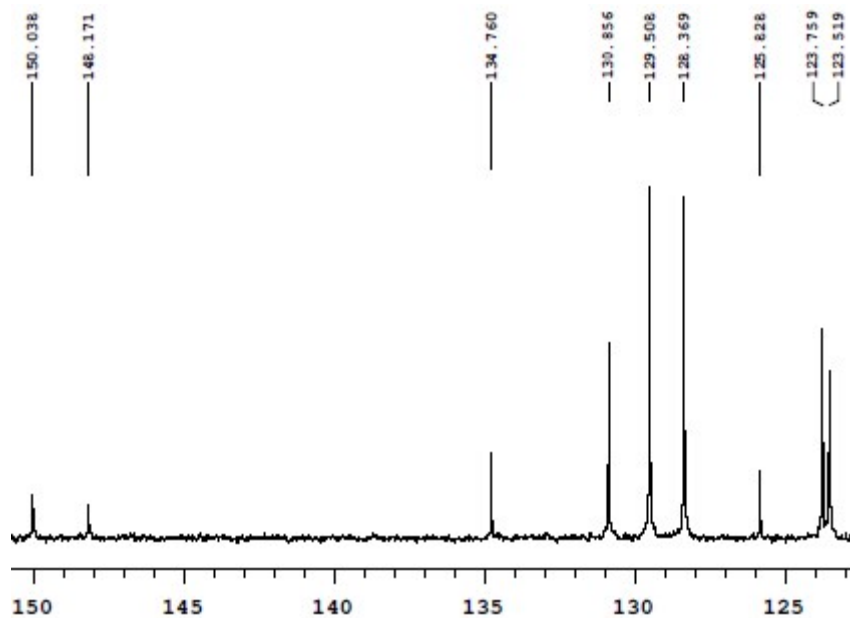

Figure S8.  $^{13}\text{C}$  NMR Spectra & its expansion for compound **3c** in  $\text{CDCl}_3$

NUCLEUS : H1  
 FREQ (MHz) : 399.64  
 AT (sec) : 2.27  
 SW (ppm) : 18.08  
 RD (sec) : 1.00  
 PW (usec) : 6.60  
 Scans : 64  
 Solvent : dmsc  
 Data Points : 32768  
 LB (Hz) : 1.00  
 TEMP (K) : 303.15  
 EXP : s2pul  
 DATE : Nov 20 2015  
 System : VNMR\_400

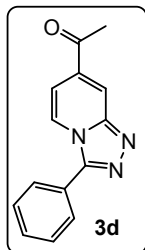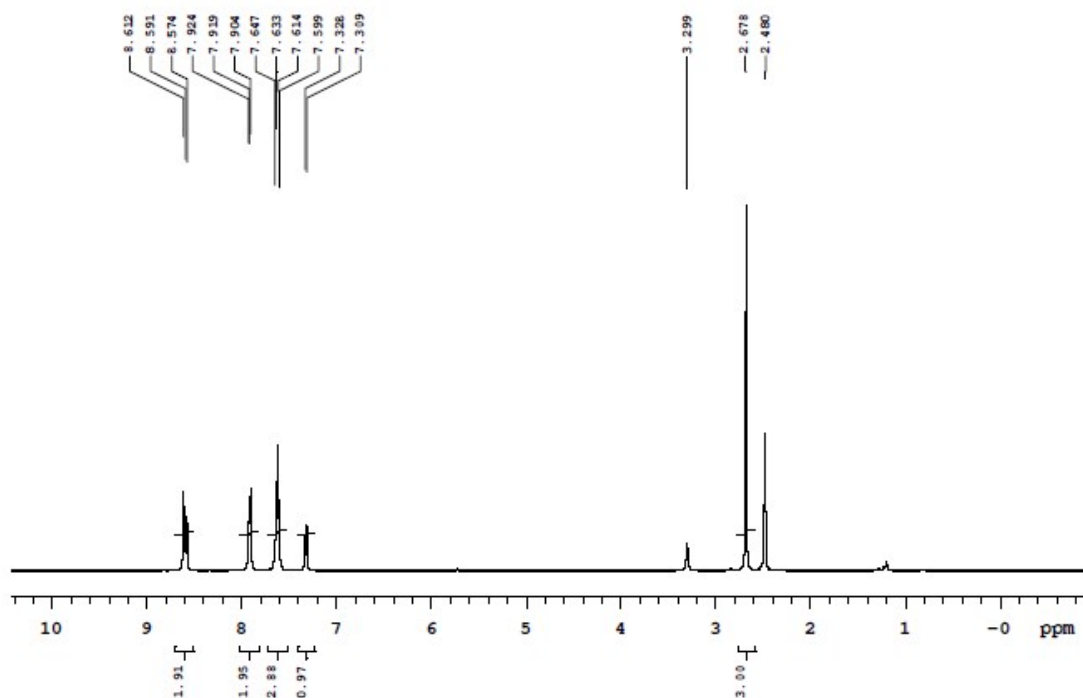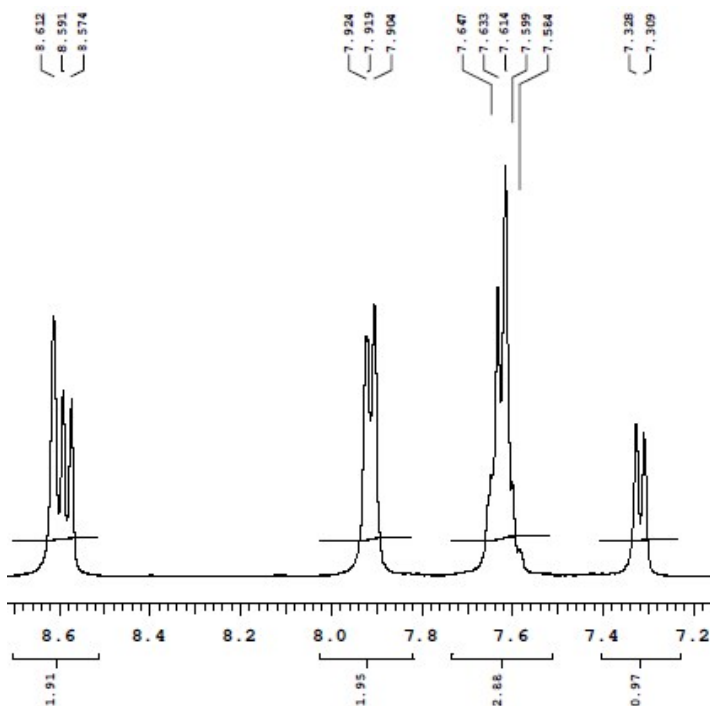

**Figure S9.**  $^1\text{H}$  NMR Spectra & its expansion for compound **3d** in  $\text{DMSO-}d_6$



NUCLEUS : C13  
PQ (MHz) : 100.50  
AT (sec) : 1.28  
SW (ppm) : 253.84  
RD (sec) : 1.00  
DW (usec) : 5.05  
Scans : 2000  
Solvent : dms0  
Data Points : 65536  
LB (Hz) : 5.00  
TEMP (K) : 333.15  
EXP : gpcul  
DATE : Nov 21 2015  
System : VNMR5\_400

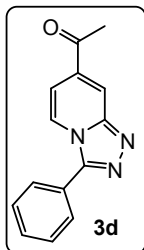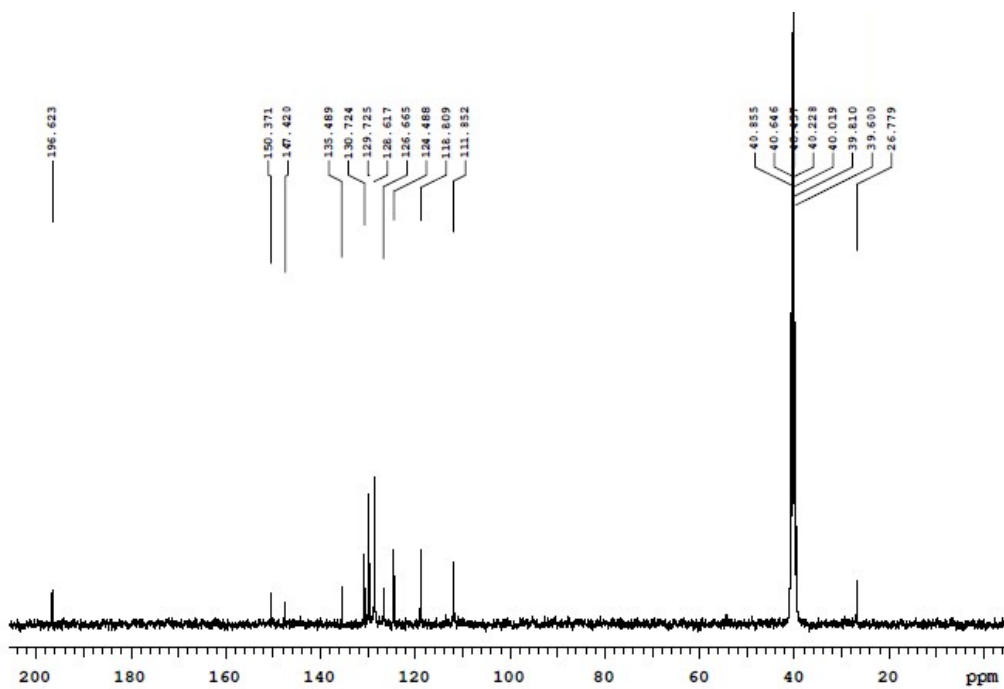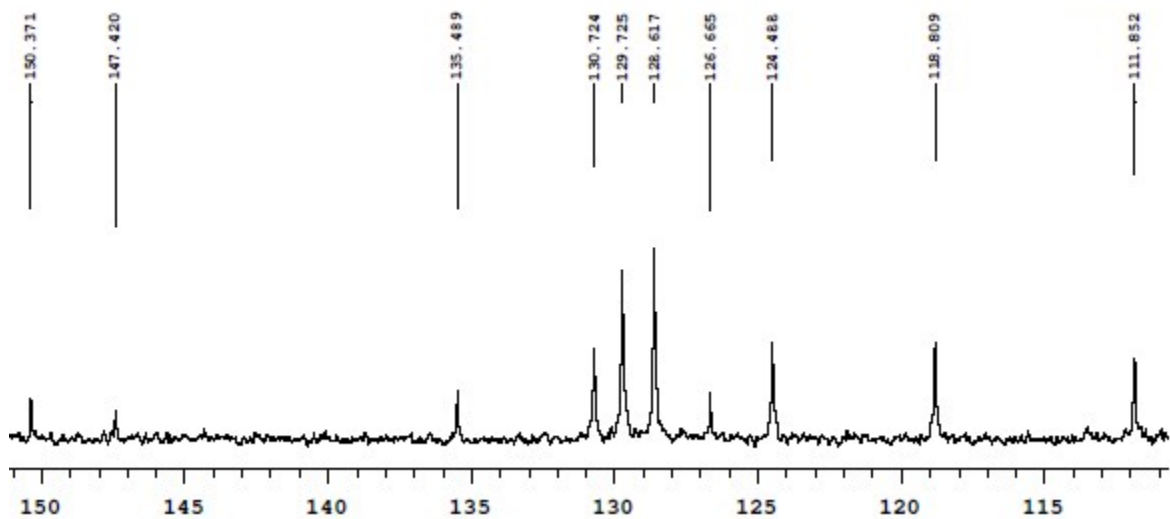

**Figure S10.**  $^{13}\text{C}$  NMR Spectra & its expansion for compound **3d** in  $\text{DMSO-}d_6$

NUCLEUS : H1  
 FREQ (MHz) : 399.63  
 AT (sec) : 2.27  
 SW (ppm) : 18.08  
 RD (sec) : 1.00  
 DW (usec) : 6.60  
 Scans : 64  
 Solvent : cdcl3  
 Data Points : 32768  
 LB (Hz) : 2.00  
 TEMP (K) : 303.15  
 EXP : s2pul  
 DATE : Nov 26 2015  
 System : VNMR5\_400

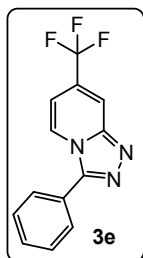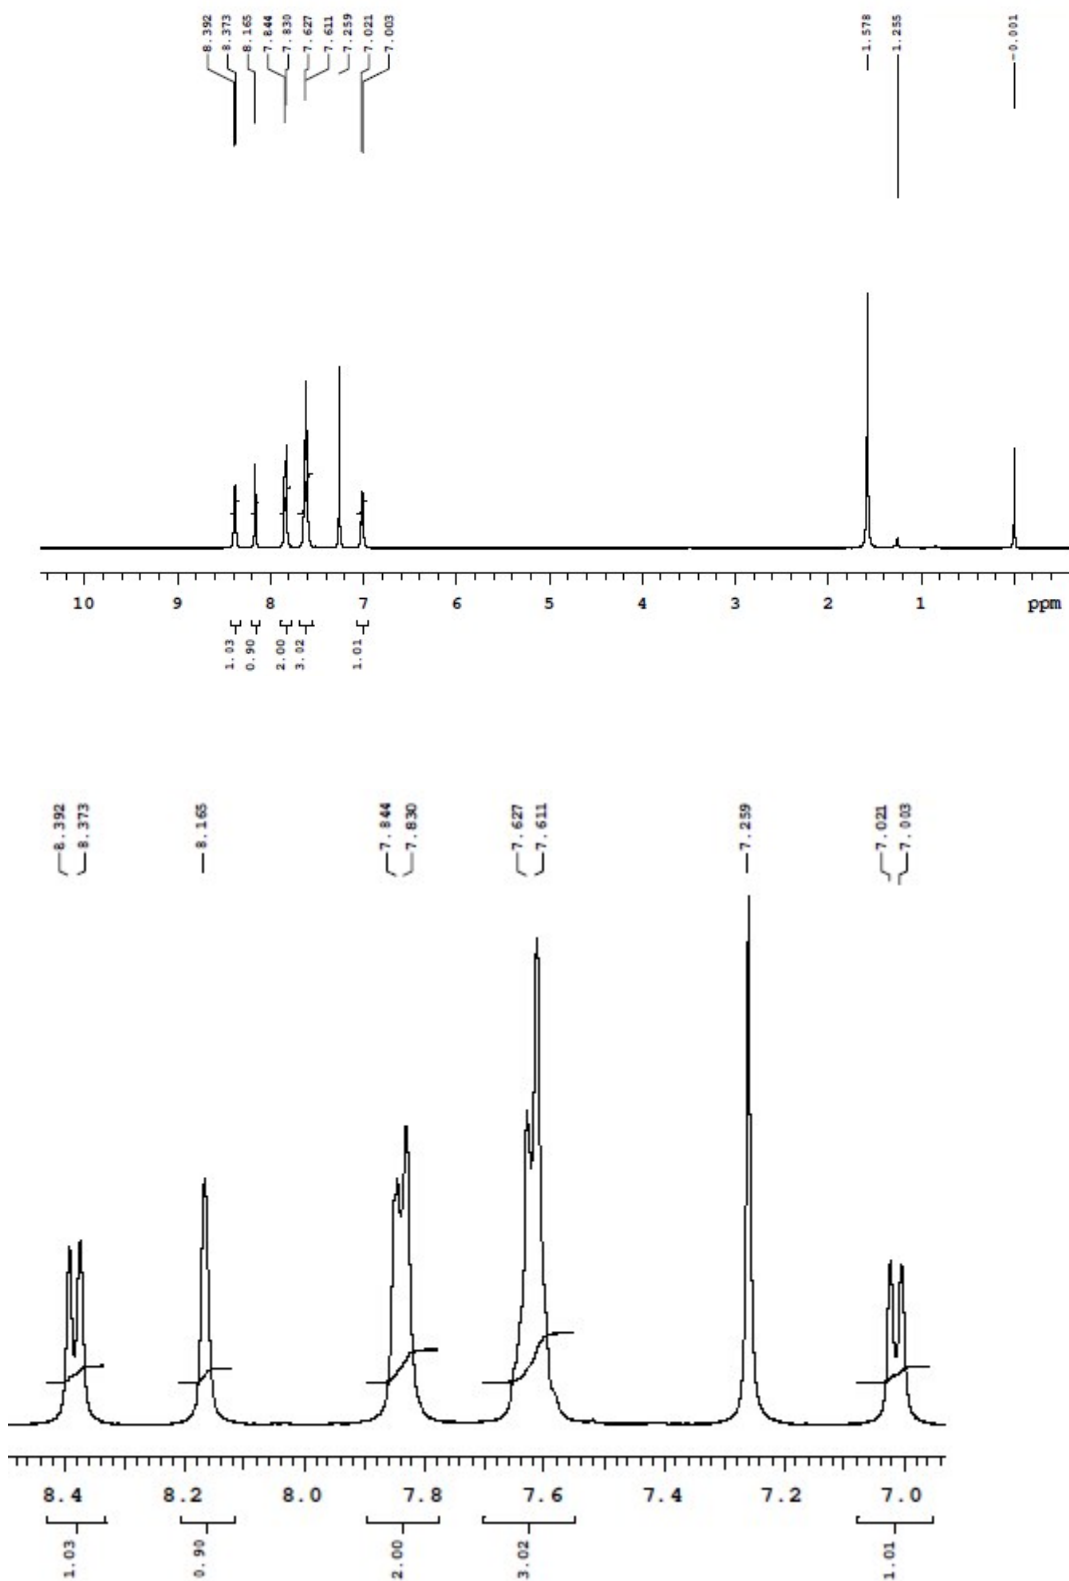

**Figure S11.**  $^1\text{H}$  NMR Spectra & its expansion for compound **3e** in  $\text{CDCl}_3$

NUCLEUS : C13  
 FREQ (MHz) : 100.50  
 AT (sec) : 1.28  
 SW (ppm) : 253.84  
 FD (sec) : 1.00  
 DW (usec) : 5.05  
 Scans : 3000  
 Solvent : cdcl3  
 Data Points : 65536  
 LB (Hz) : 2.00  
 TEMP (K) : 303.15  
 EXP : s2pu1  
 DATE : Dec 5 2015  
 System : VNMRB\_400

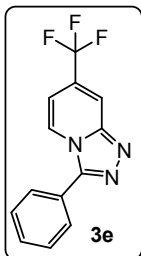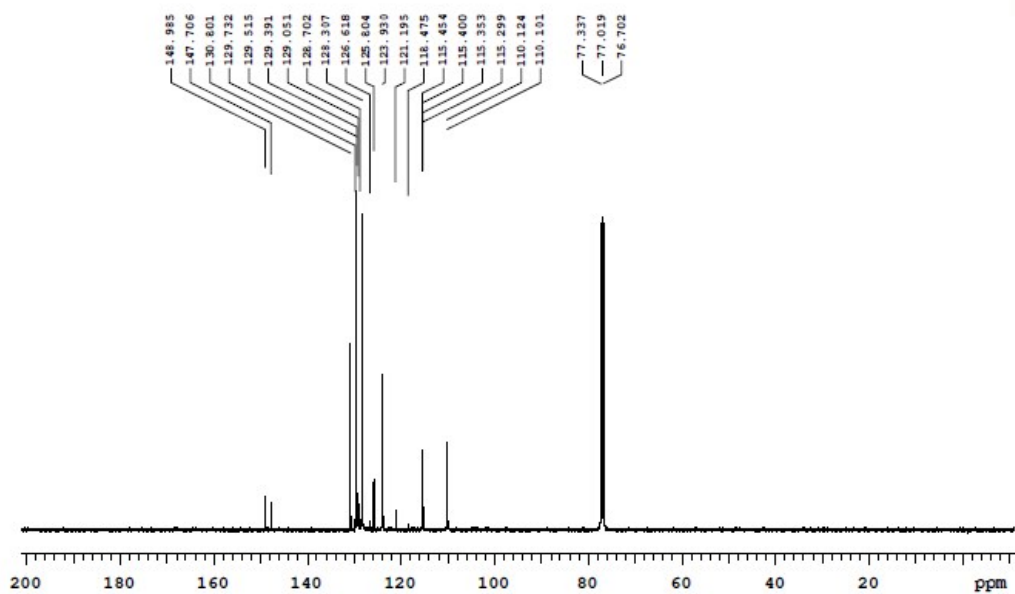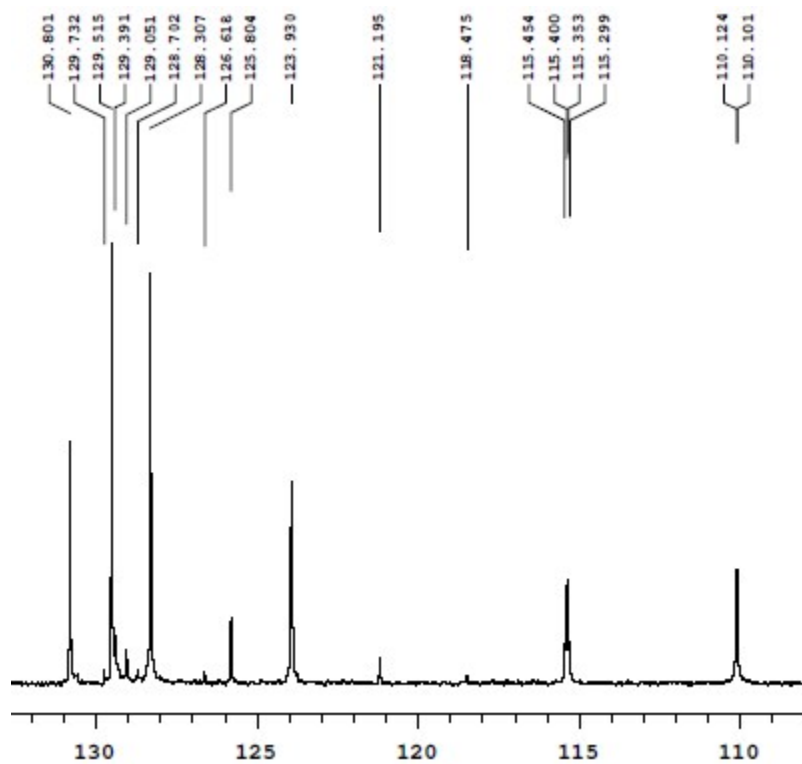

**Figure S12.**  $^{13}\text{C}$  NMR Spectra & its expansion for compound **3e** in  $\text{CDCl}_3$

NUCLEUS : H1  
 FRQ (MHz) : 399.63  
 AT (sec) : 2.27  
 SW (ppm) : 18.08  
 RD (sec) : 1.00  
 FWH (usec) : 6.60  
 Scans : 64  
 Solvent : cdcl3  
 Data Points : 32768  
 LB (Hz) : 2.00  
 TEMP (K) : 303.15  
 EXP : s2pul  
 DATE : Nov 20 2015  
 System : VNMR5\_400

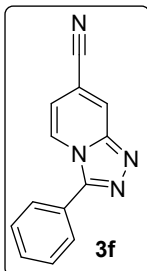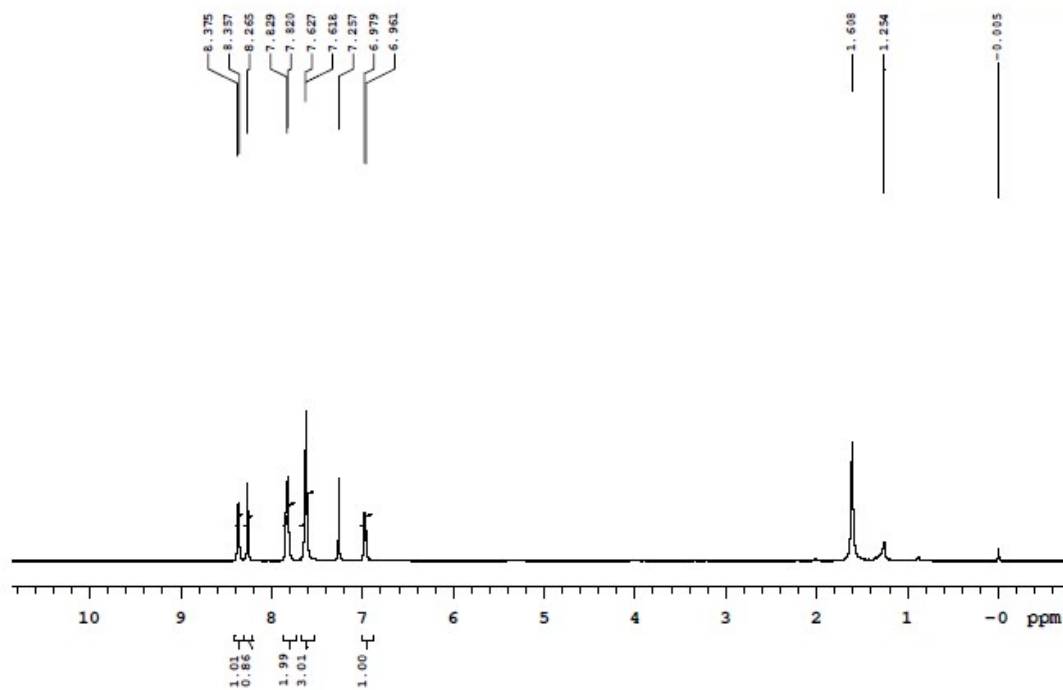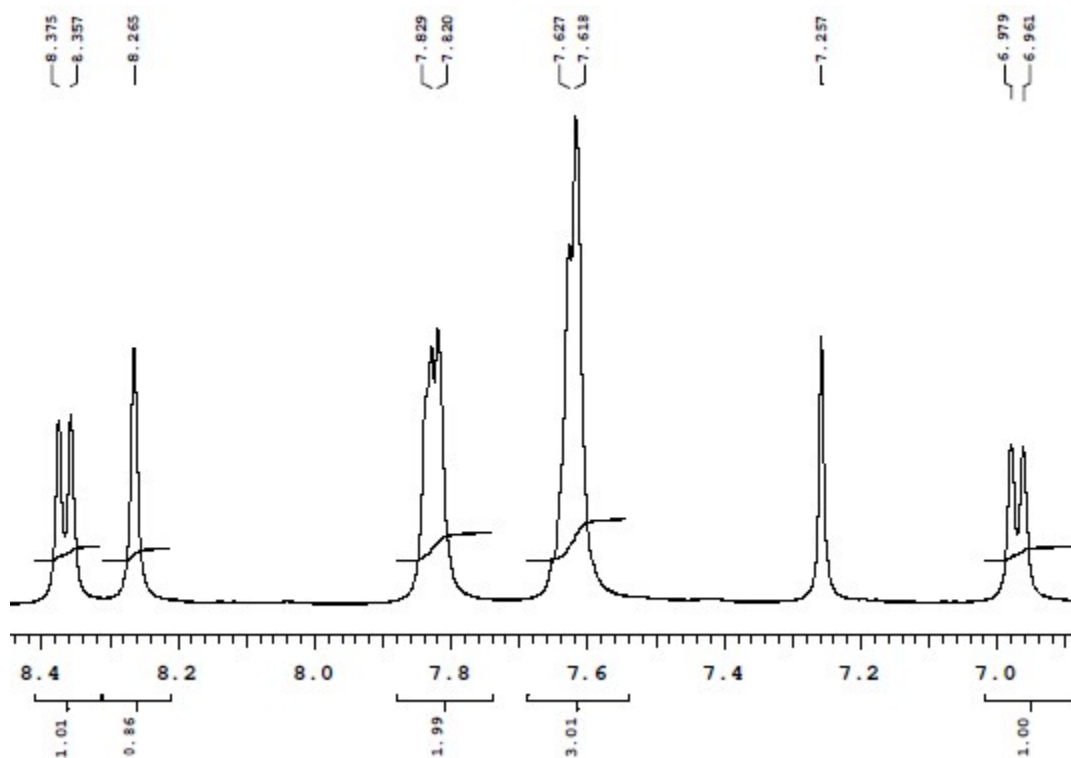

**Figure S13.**  $^1\text{H}$  NMR Spectra & its expansion for compound **3f** in  $\text{CDCl}_3$

NUCLEUS : C13  
FRQ (MHz) : 100.50  
AT (sec) : 1.28  
SW (ppm) : 253.84  
RE (sec) : 1.00  
PW (usec) : 5.05  
Scans : 1500  
Solvent : cdcl3  
Data Points : 65536  
LB (Hz) : 4.00  
TEMP (K) : 303.15  
EXP : #2pul  
DATE : Nov 24 2015  
System : VNMRB\_400

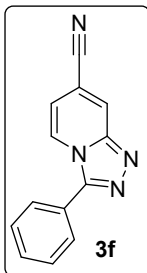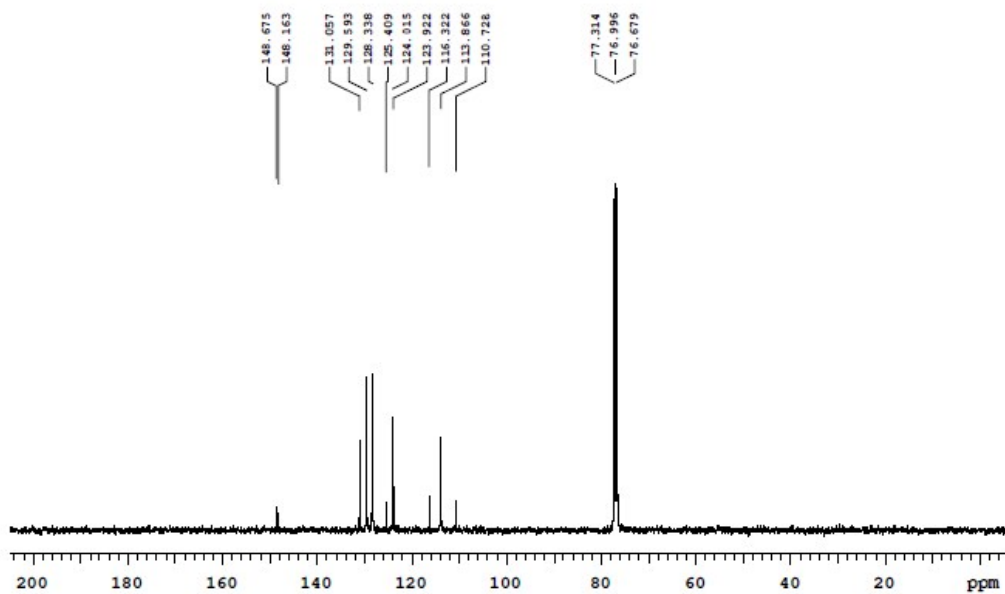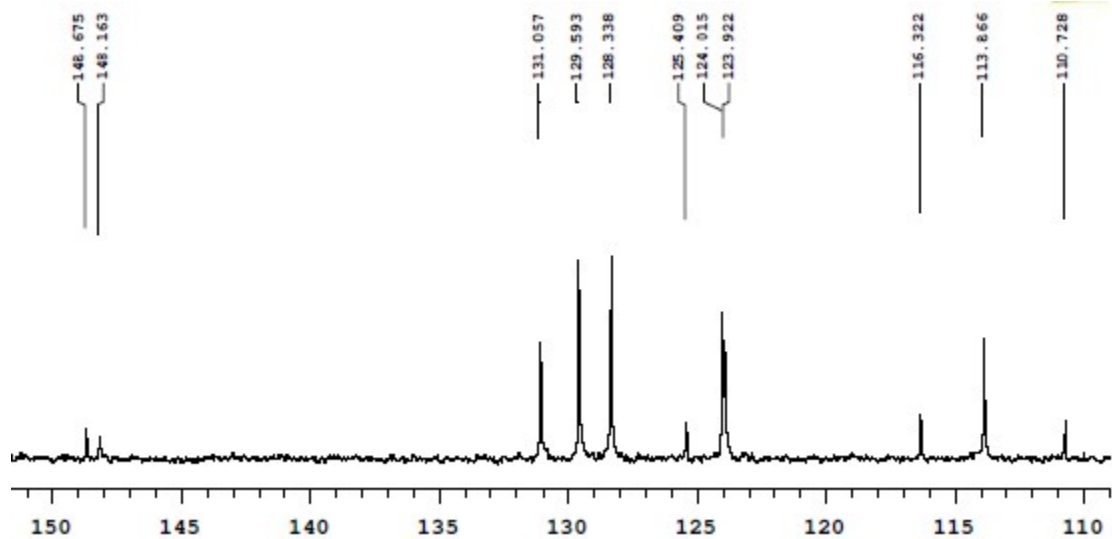

**Figure S14.**  $^{13}\text{C}$  NMR Spectra & its expansion for compound **3f** in  $\text{CDCl}_3$

NUCLEUS : H1  
 FREQ (MHz) : 399.63  
 AT (sec) : 2.27  
 SW (ppm) : 18.08  
 RD (sec) : 1.00  
 PW (usec) : 6.60  
 Scans : 64  
 Solvent : cdc13  
 Data Points : 32768  
 LB (Hz) : 2.00  
 TEMP (K) : 303.15  
 END : s2pul  
 DATE : Nov 9 2015  
 System : VNMR\_400

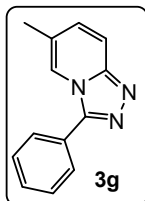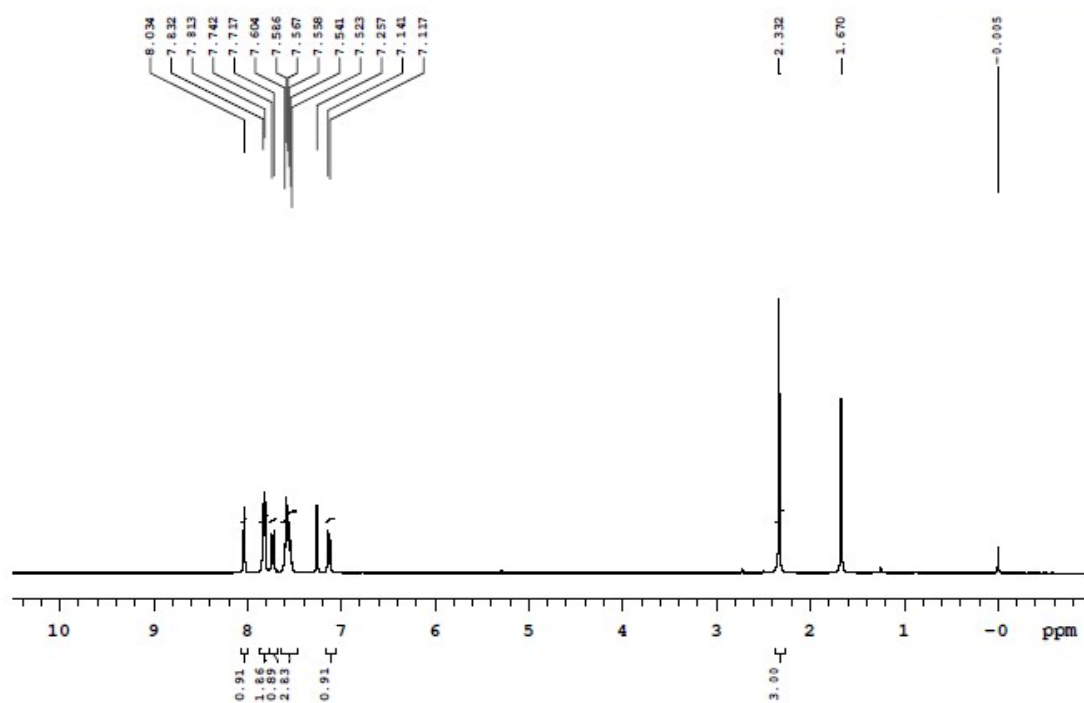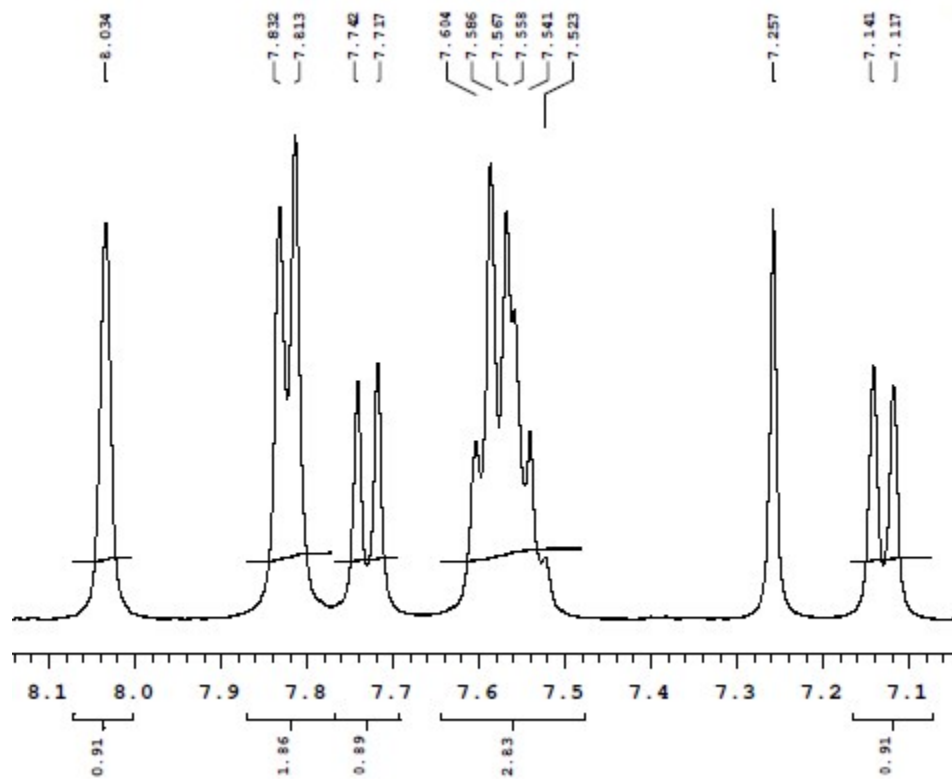

**Figure S15.**  $^1\text{H}$  NMR Spectra & its expansion for compound **3g** in  $\text{CDCl}_3$

NUCLEUS : C13  
 FREQ (MHz) : 100.50  
 AT (sec) : 1.28  
 SW (ppm) : 253.84  
 RD (sec) : 1.00  
 PW (usec) : 5.05  
 Scans : 1500  
 Solvent : cdcl3  
 Data Points : 65536  
 LB (Hz) : 3.00  
 TEMP (K) : 303.15  
 EXP : s2pul  
 DATE : Nov 21 2015  
 System : VNMR5\_400

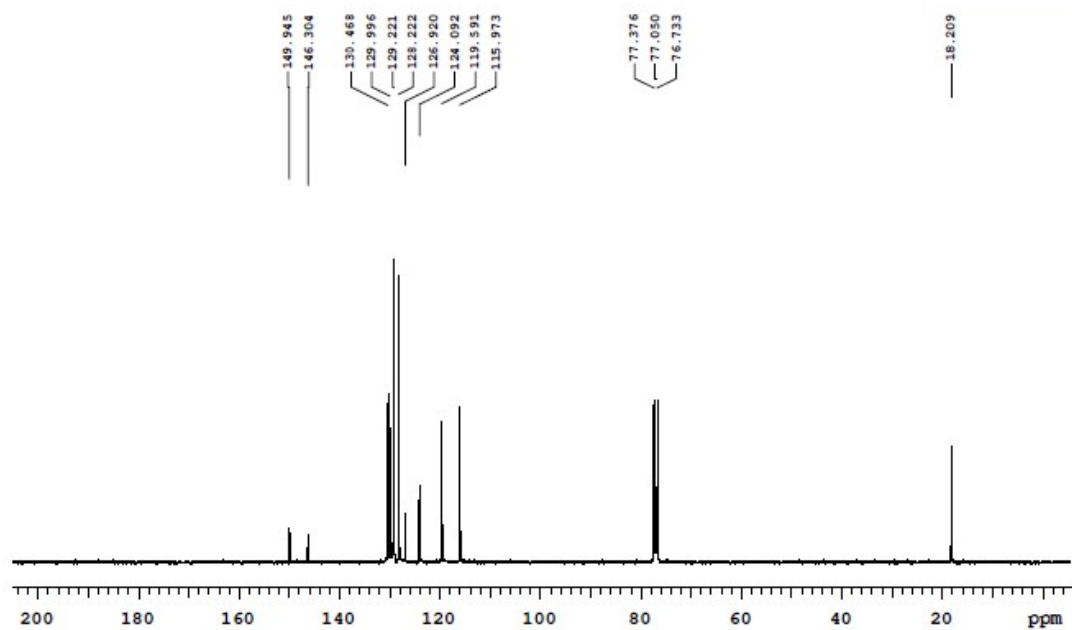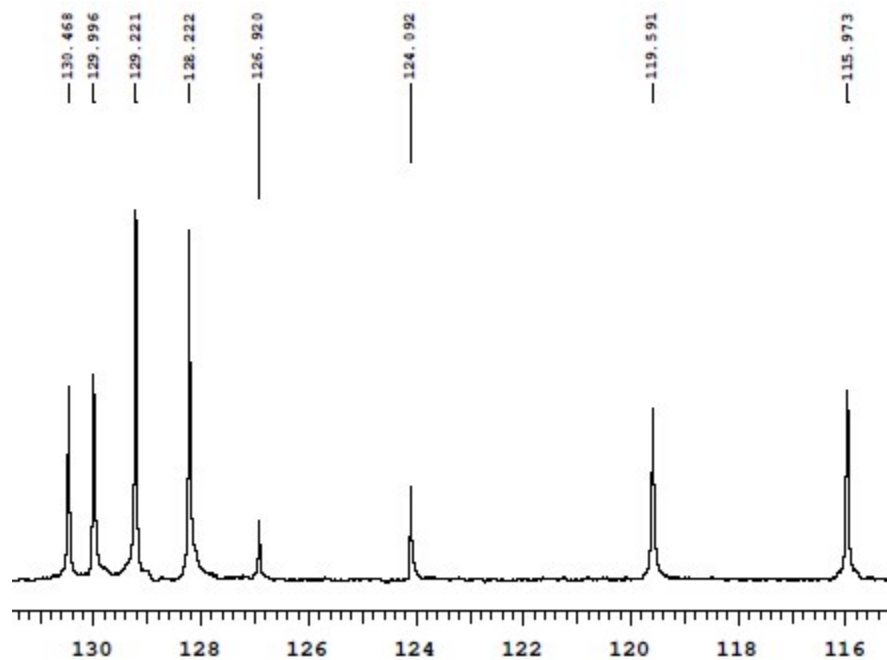

**Figure S16.**  $^{13}\text{C}$  NMR Spectra & its expansion for compound **3g** in  $\text{CDCl}_3$

NUCLEUS : H1  
 FREQ (MHz) : 399.63  
 AT (sec) : 2.27  
 SW (ppm) : 18.08  
 RD (sec) : 1.00  
 FWH (usec) : 6.60  
 Scans : 64  
 Solvent : cdcl3  
 Data Points : 32768  
 LB (Hz) : 2.00  
 TEMP (K) : 303.15  
 EXP : s2pul  
 DATE : Nov 20 2015  
 System : VNMR5\_400

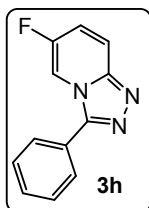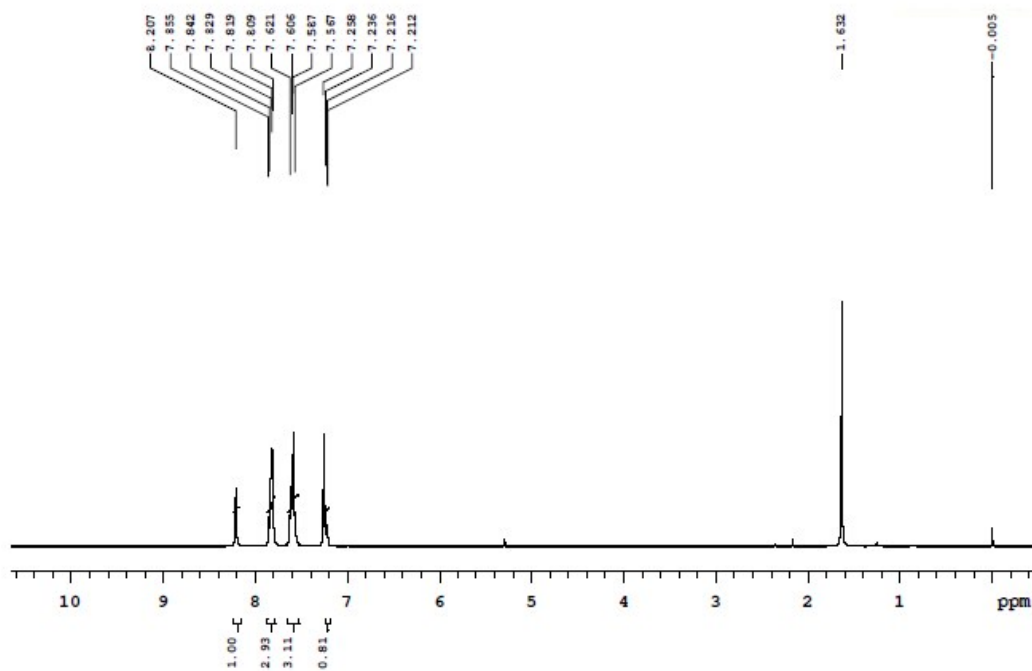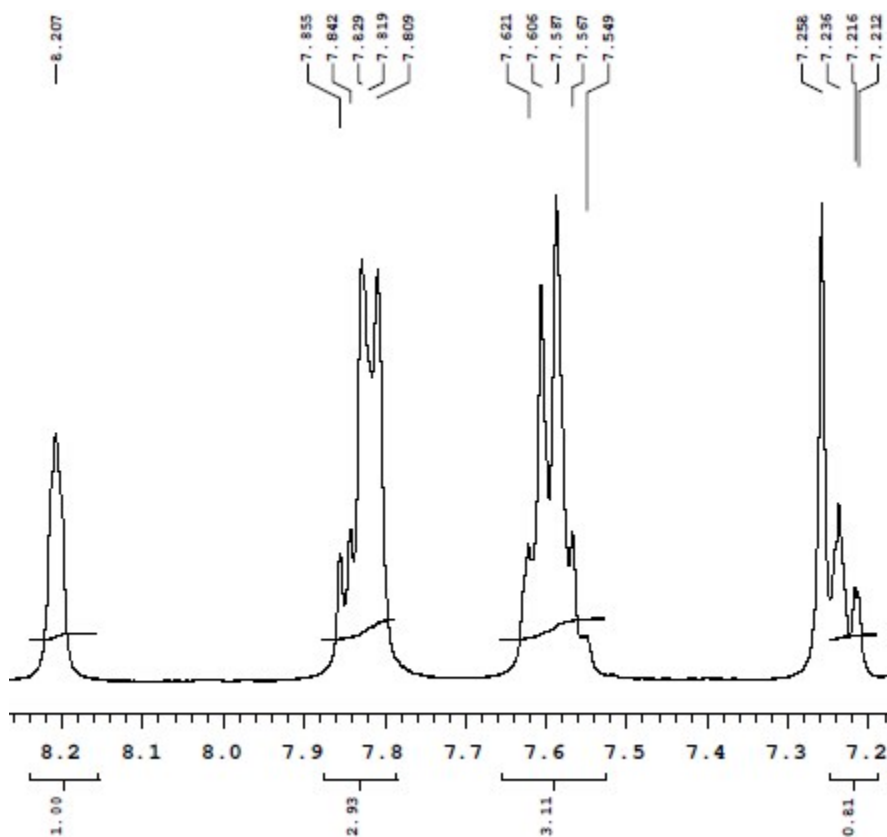

Figure S17. <sup>1</sup>H NMR Spectra & its expansion for compound **3h** in CDCl<sub>3</sub>



NUCLEUS : C13  
 FRQ (MHz) : 100.50  
 AT (sec) : 1.28  
 SW (ppm) : 253.84  
 RD (sec) : 1.00  
 FWH (usec) : 5.05  
 Scans : 1500  
 Solvent : cdcl3  
 Data Points : 65536  
 LB (Hz) : 4.00  
 TEMP (K) : 303.15  
 EXP : s2pul  
 DATE : Nov 24 2015  
 System : VNMR5\_400

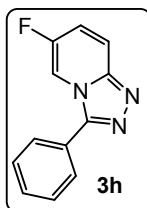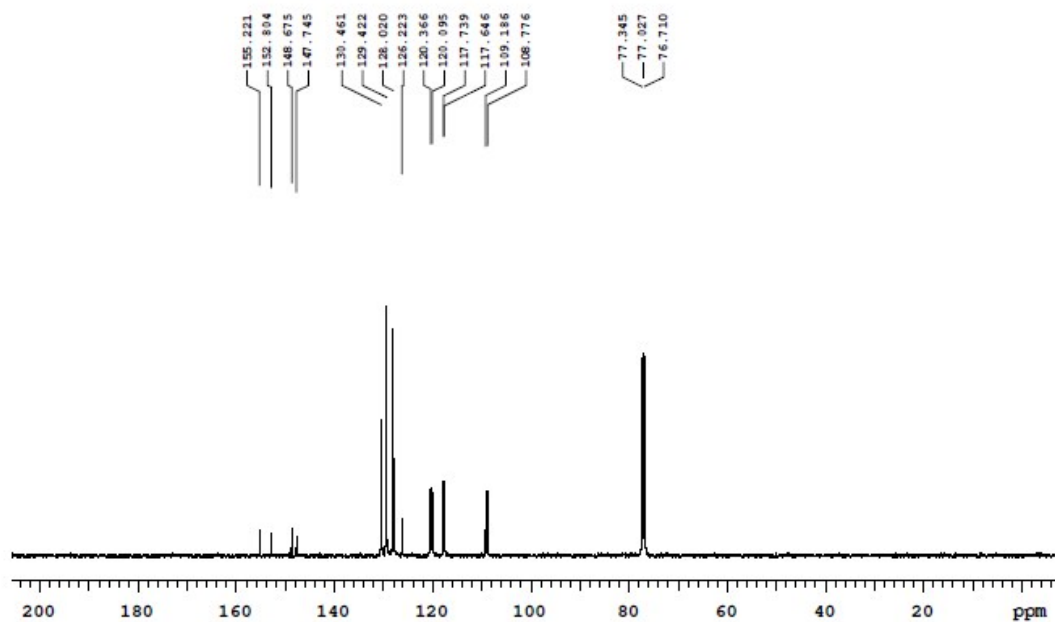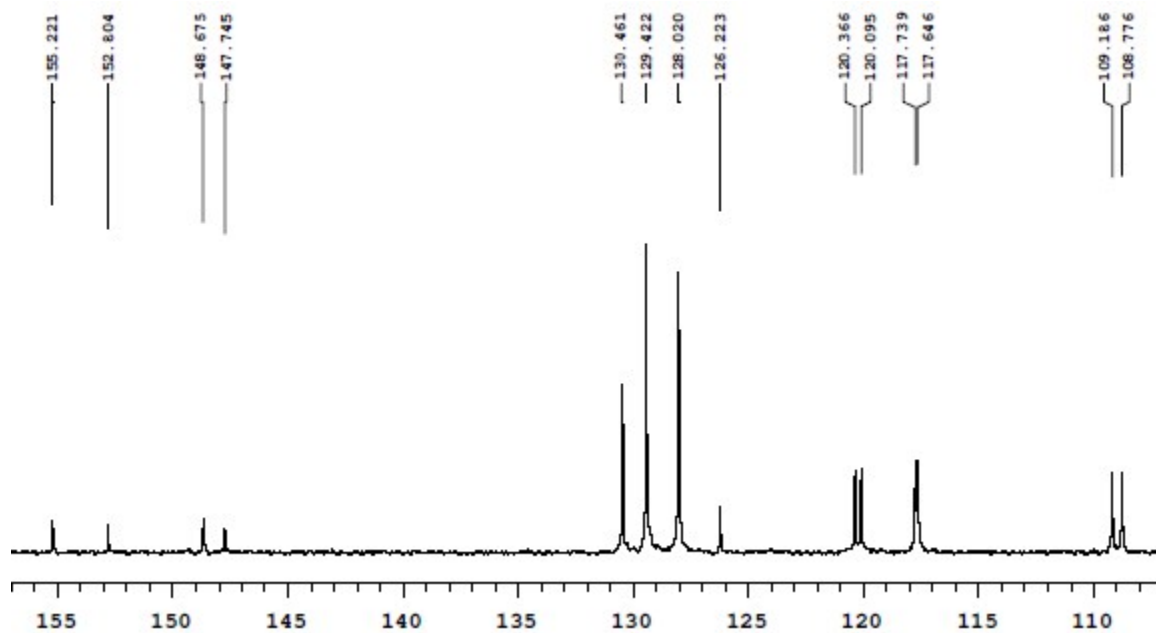

**Figure S18.**  $^{13}\text{C}$  NMR Spectra & its expansion for compound **3h** in  $\text{CDCl}_3$

NUCLEUS : H1  
FRQ (MHz) : 399.64  
AT (sec) : 2.27  
SW (ppm) : 18.08  
RD (sec) : 1.00  
FID (usec) : 6.40  
Scans : 32  
Solvent : dms0  
Data Points : 32768  
LB (Hz) : 2.00  
TEMP (K) : 303.15  
EXP : s2pul  
DATE : Dec 2 2015  
System : VNMR5\_400

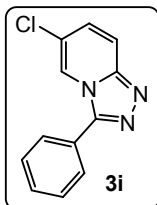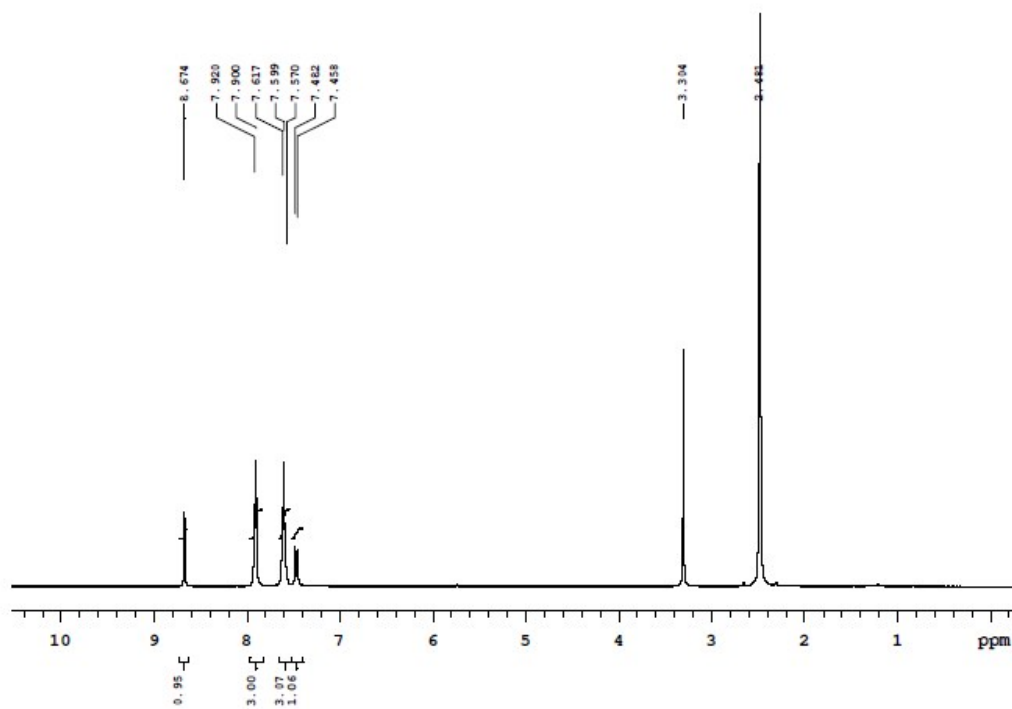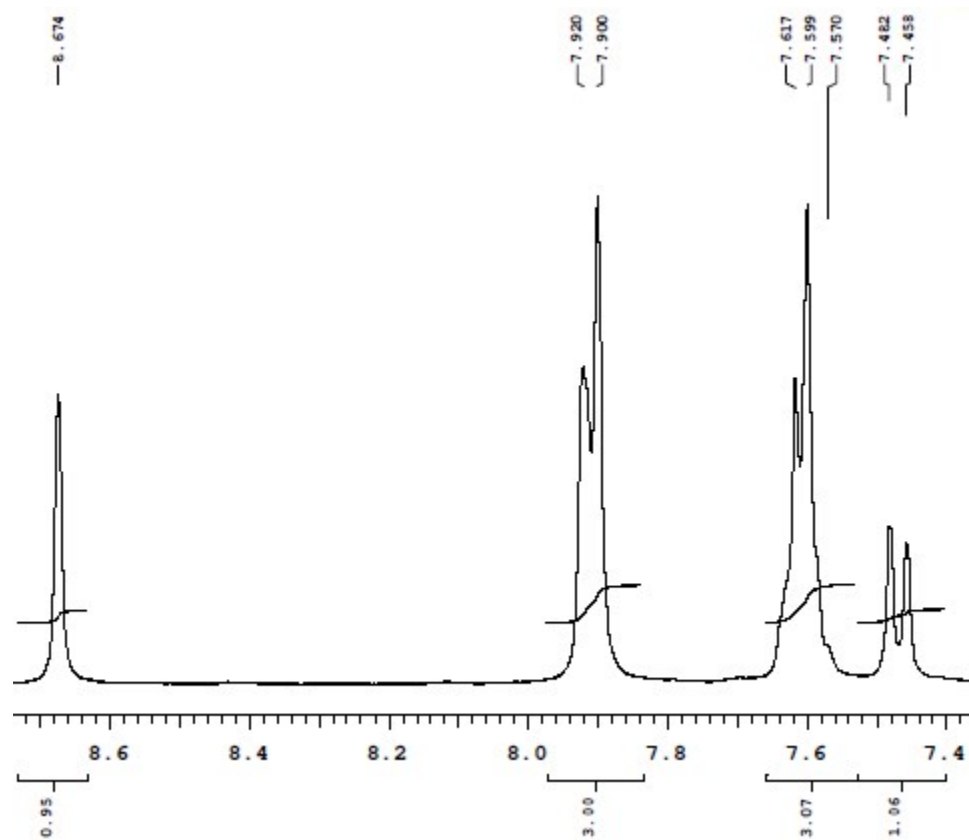

**Figure S19.**  $^1\text{H}$  NMR Spectra & its expansion for compound **3i** in  $\text{DMSO-}d_6$

NUCLEUS : C13  
 FRQ (MHz) : 100.50  
 AT (sec) : 1.28  
 SW (ppm) : 253.84  
 RD (sec) : 1.00  
 PW (usec) : 5.05  
 Scans : 3000  
 Solvent : dmsc  
 Data Points : 65536  
 LB (Hz) : 2.00  
 TEMP (K) : 303.15  
 END :  
 DATE : Dec 5 2015  
 System : VNMR\_400

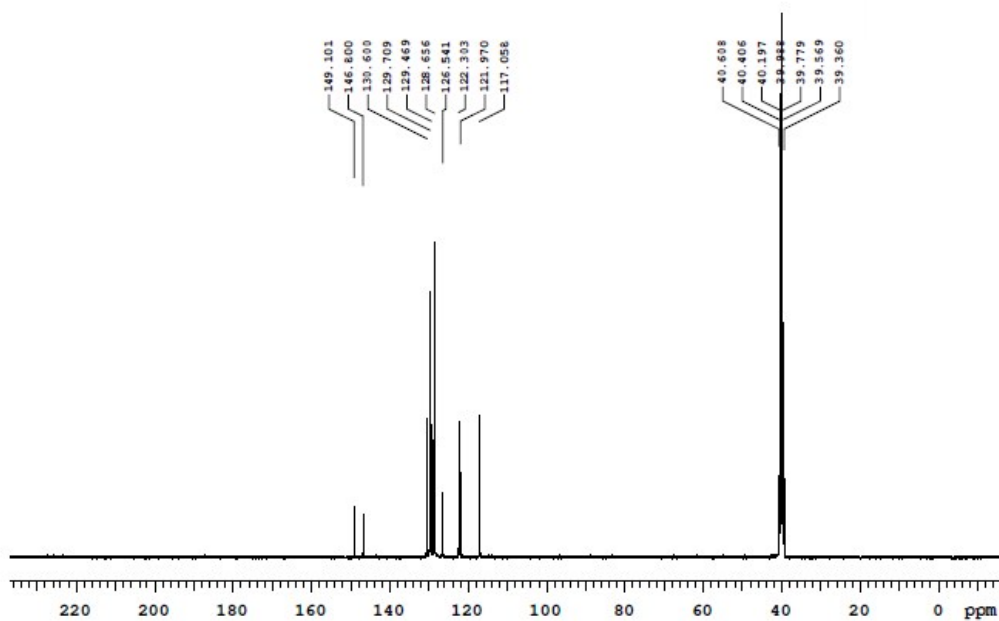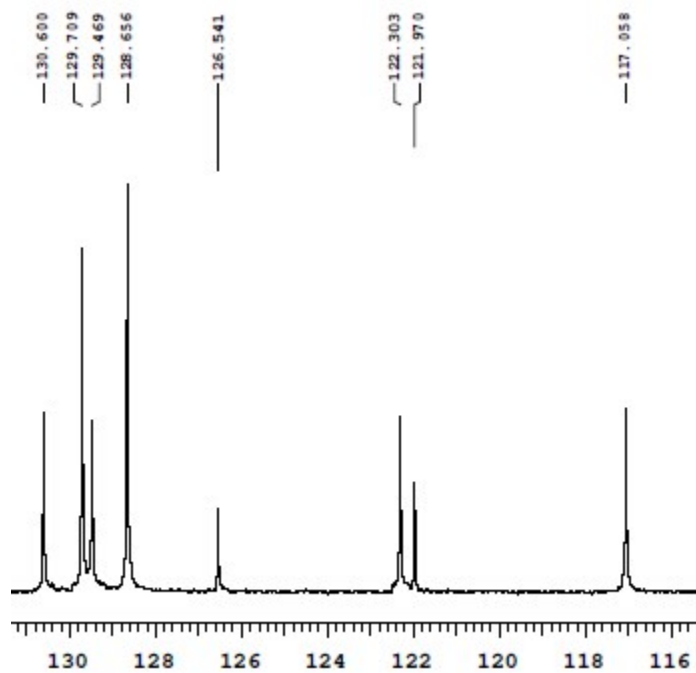

**Figure S20.**  $^{13}\text{C}$  NMR Spectra & its expansion for compound **3i** in  $\text{DMSO-}d_6$

NUCLEUS : H1  
 FREQ (MHz) : 399.63  
 AT (sec) : 2.27  
 SW (ppm) : 18.08  
 RD (sec) : 1.00  
 DW (usec) : 6.60  
 Scans : 64  
 Solvent : cdcl3  
 Data Points : 32768  
 LB (Hz) : 1.00  
 TEMP (K) : 303.15  
 END : s2pul  
 DATE : Nov 4 2015  
 System : VNMR5\_400

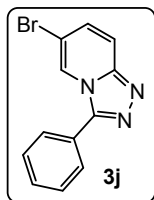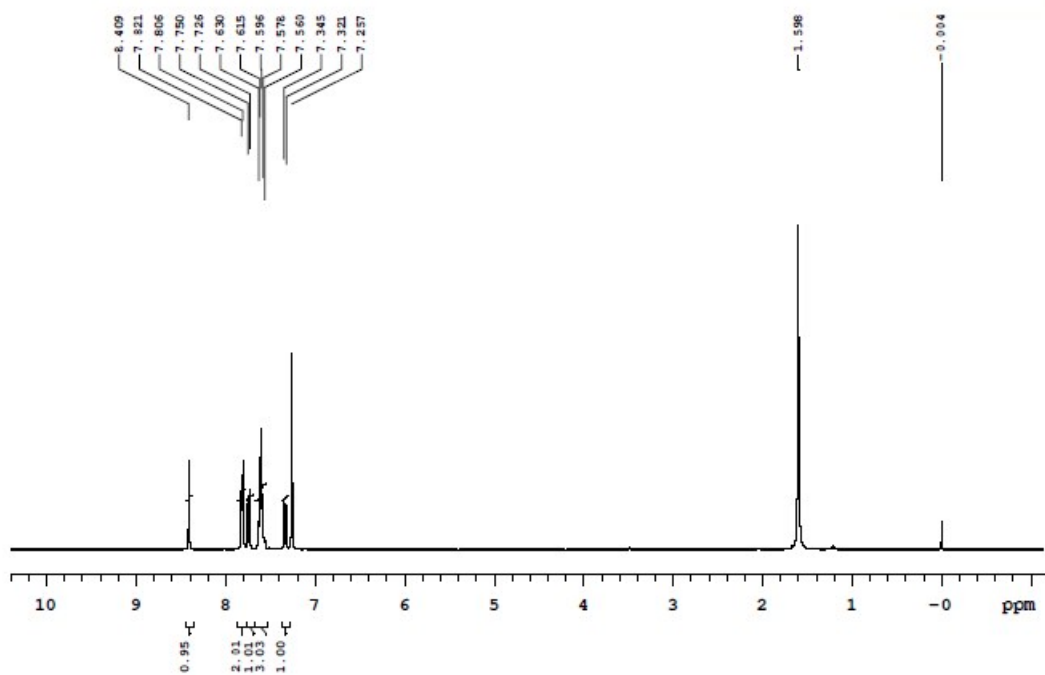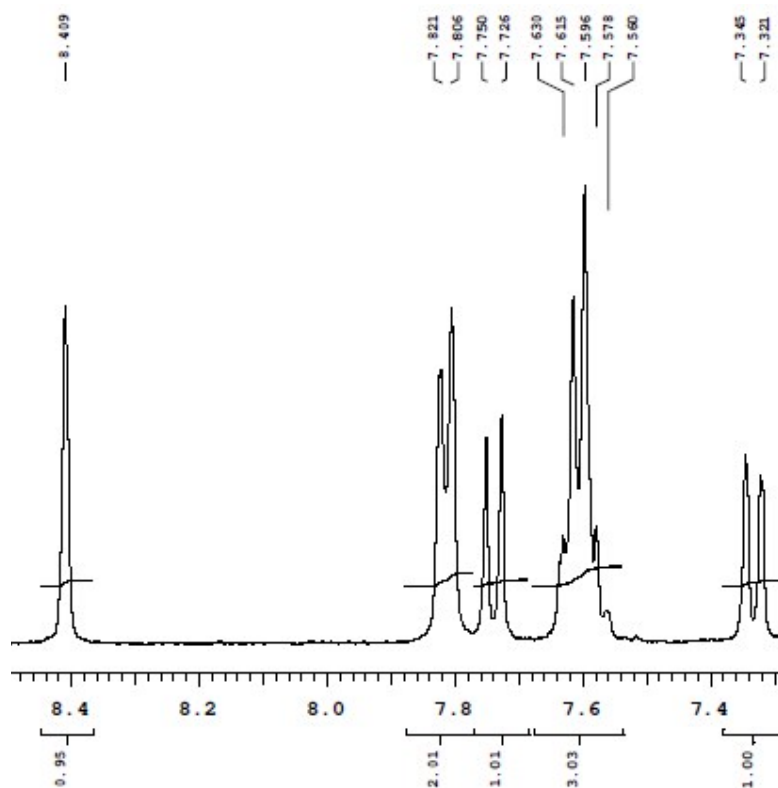

**Figure S21.**  $^1\text{H}$  NMR Spectra & its expansion for compound **3j** in  $\text{CDCl}_3$

NUCLEUS : C13  
FRQ (MHz) : 100.50  
AT (sec) : 1.28  
SW (ppm) : 253.84  
RD (sec) : 1.00  
PW (usec) : 5.05  
Scans : 1500  
Solvent : cdcl3  
Data Points : 65536  
LS (Hz) : 2.00  
TEMP (K) : 303.15  
EXP : s2p01  
DATE : Dec 15 2015  
System : VNMR5\_400

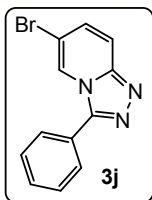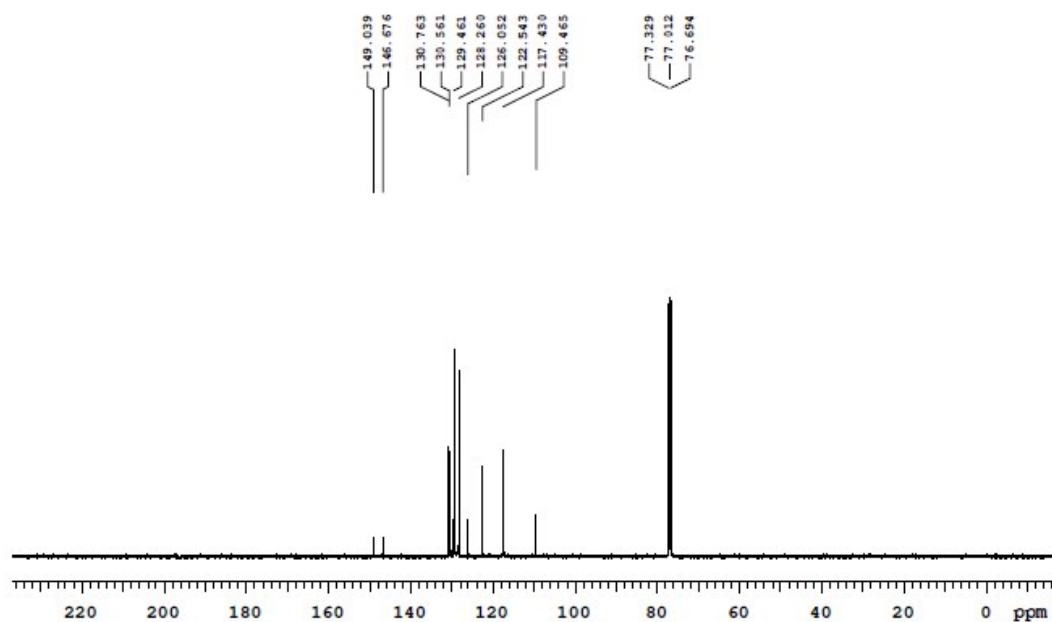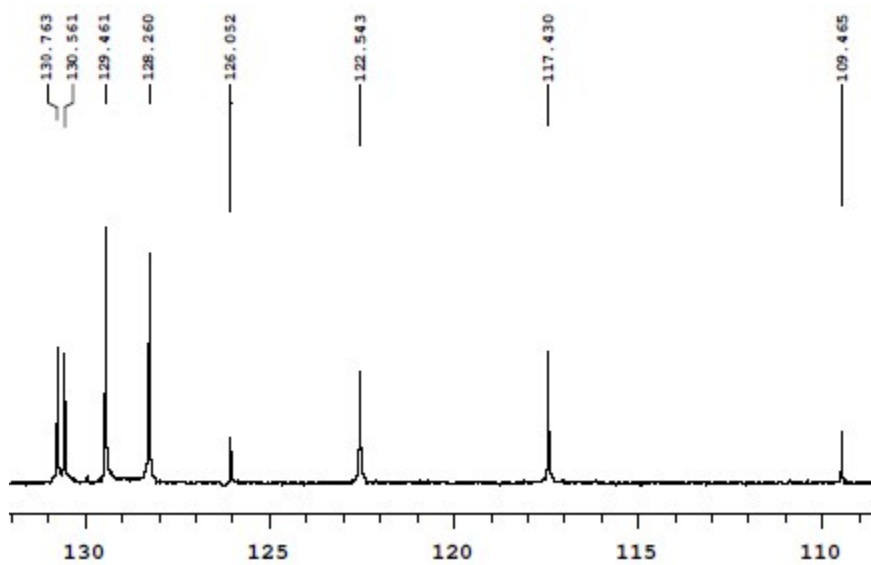

**Figure S22.**  $^{13}\text{C}$  NMR Spectra & its expansion for compound **3j** in  $\text{CDCl}_3$

NUCLEUS : H1  
 FREQ (MHz) : 399.63  
 AT (sec) : 2.27  
 SW (ppm) : 18.08  
 RD (sec) : 1.00  
 PW (usec) : 6.60  
 Scans : 64  
 Solvent : cdcl3  
 Data Points : 32768  
 LB (Hz) : 1.00  
 TEMP (K) : 303.15  
 EXP : s2pu1  
 DATE : Nov 5 2015  
 System : VNMR5\_400

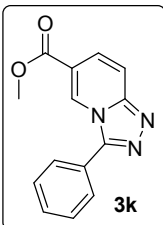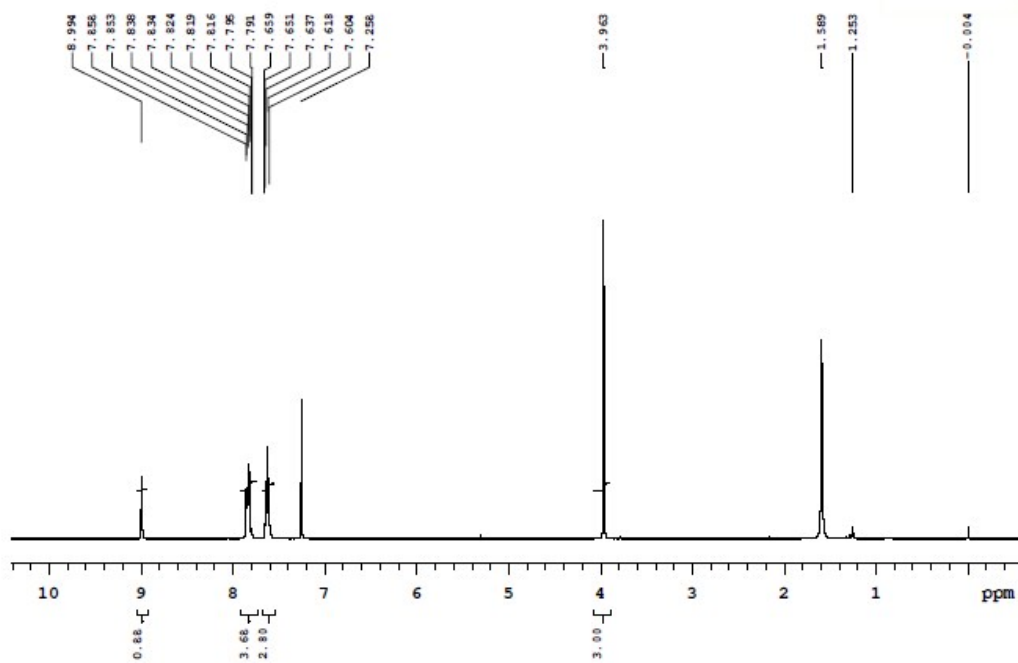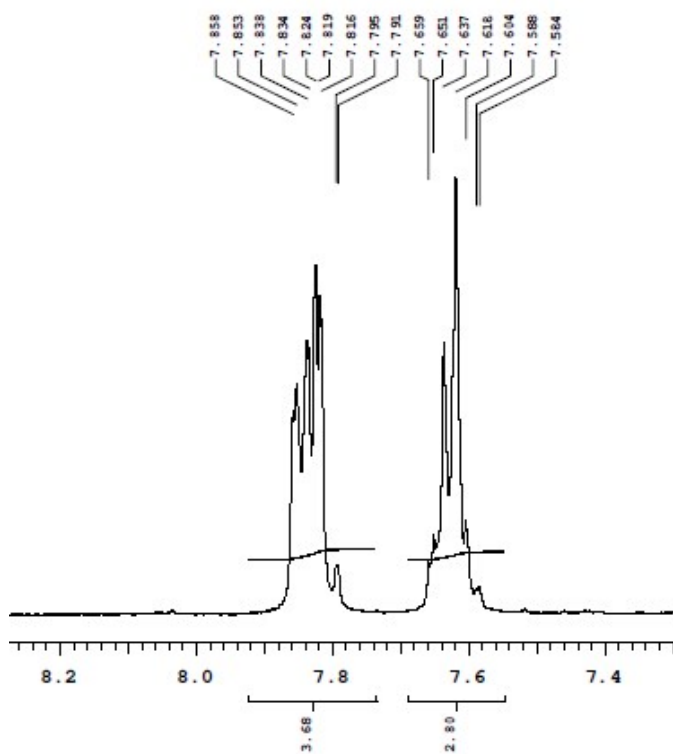

**Figure S23.**  $^1\text{H}$  NMR Spectra & its expansion for compound **3k** in  $\text{CDCl}_3$

NUCLEUS : C13  
FRQ (MHz) : 100.50  
AT (sec) : 1.28  
SW (ppm) : 253.84  
RD (sec) : 1.00  
PW (usec) : 5.05  
Scans : 1500  
Solvent : cdcl3  
Data Points : 65536  
LB (Hz) : 8.00  
TEMP (K) : 303.15  
END : s2pul  
DATE : Nov 21 2015  
System : VNMR5\_400

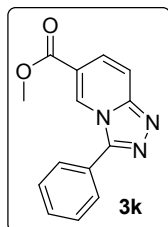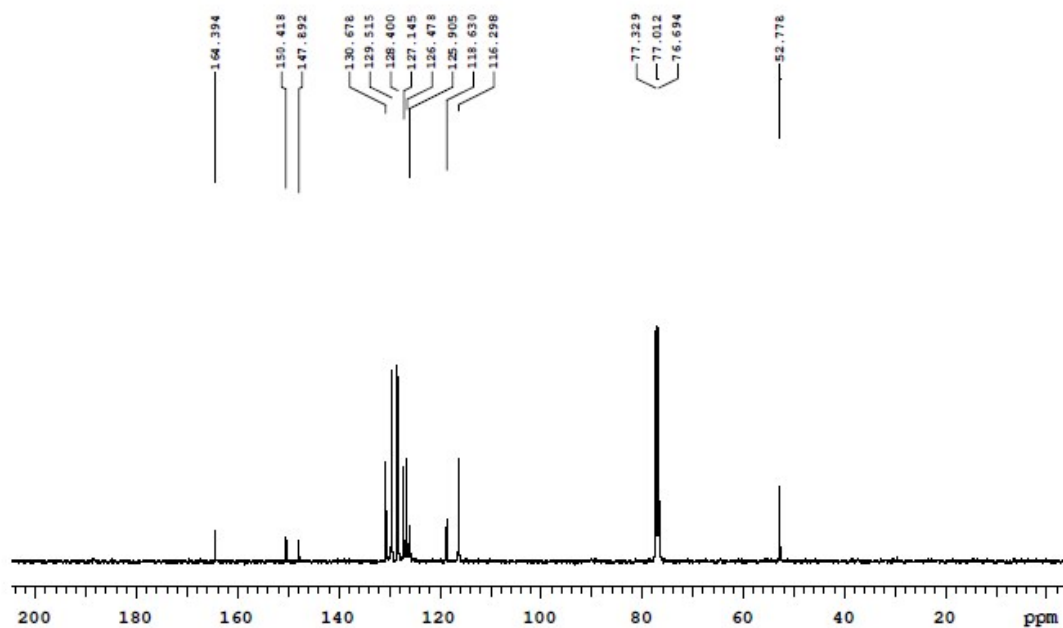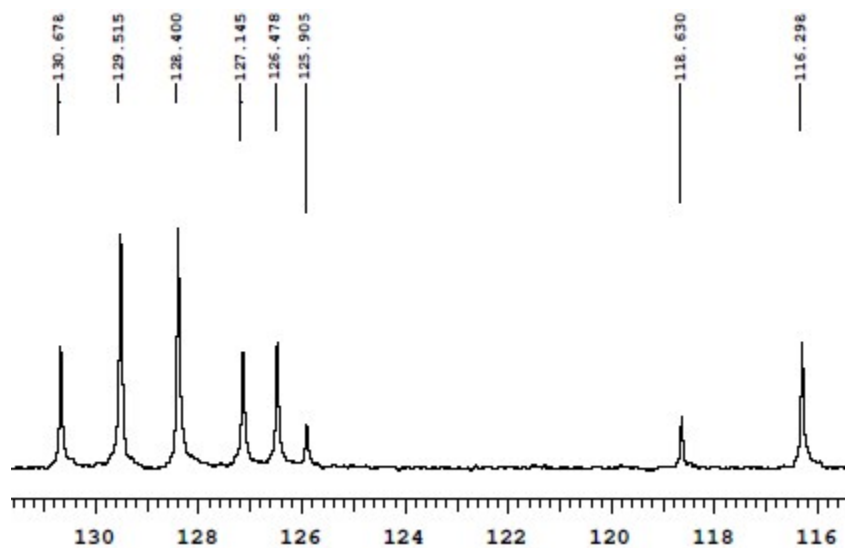

Figure S24. <sup>13</sup>C NMR Spectra & its expansion for compound **3k** in CDCl<sub>3</sub>

NUCLEUS : H1  
 FREQ (MHz) : 399.63  
 AT (sec) : 2.27  
 SW (ppm) : 18.08  
 RD (sec) : 1.00  
 PW (usec) : 6.40  
 Scans : 64  
 Solvent : cdcl3  
 Data Points : 32768  
 LB (Hz) : 2.00  
 TEMP (K) : 303.15  
 EXP : s2pu1  
 DATE : May 17 2016  
 System : VNMR5\_400

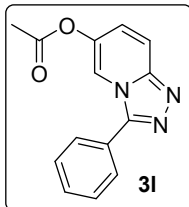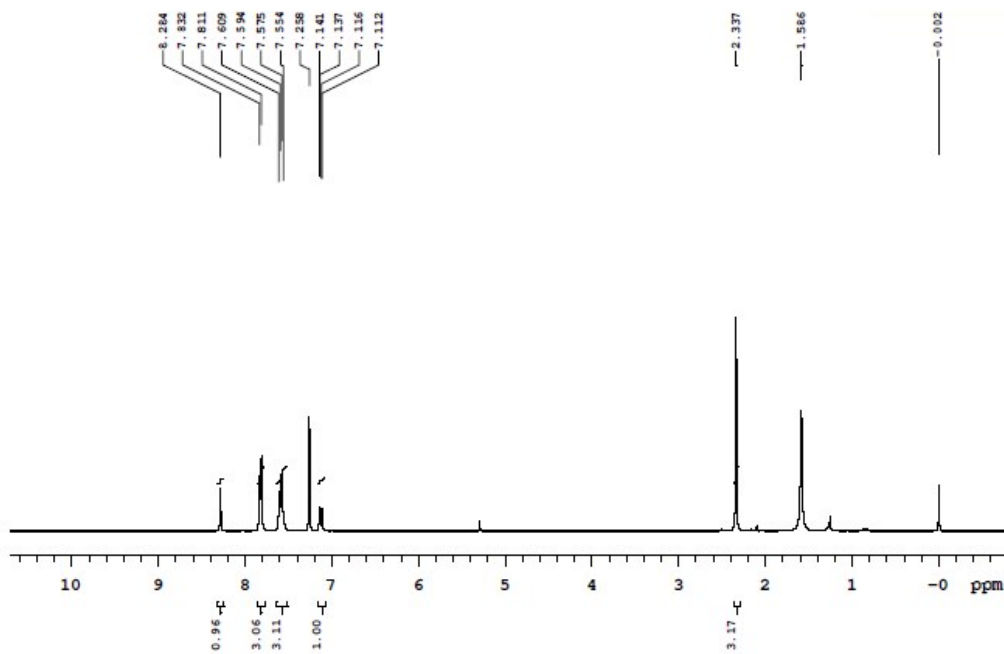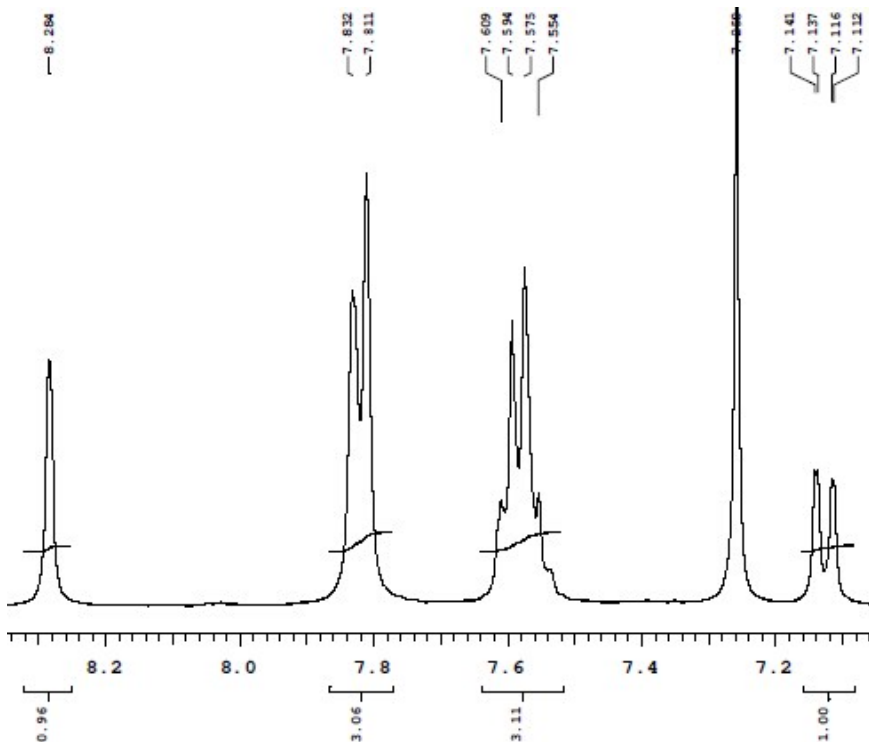

**Figure S25.**  $^1\text{H}$  NMR Spectra & its expansion for compound **31** in  $\text{CDCl}_3$



NUCLEUS : C13  
 FREQ (MHz) : 100.50  
 AT (sec) : 1.28  
 SW (ppm) : 253.84  
 FD (Hz) : 1.00  
 DW (usec) : 5.05  
 Scans : 4000  
 Solvent : cdcl3  
 Data Points : 65536  
 LB (Hz) : 6.00  
 TEMP (K) : 303.15  
 EXP : s2pul  
 DATE : May 18 2016  
 System : VNMR5\_400

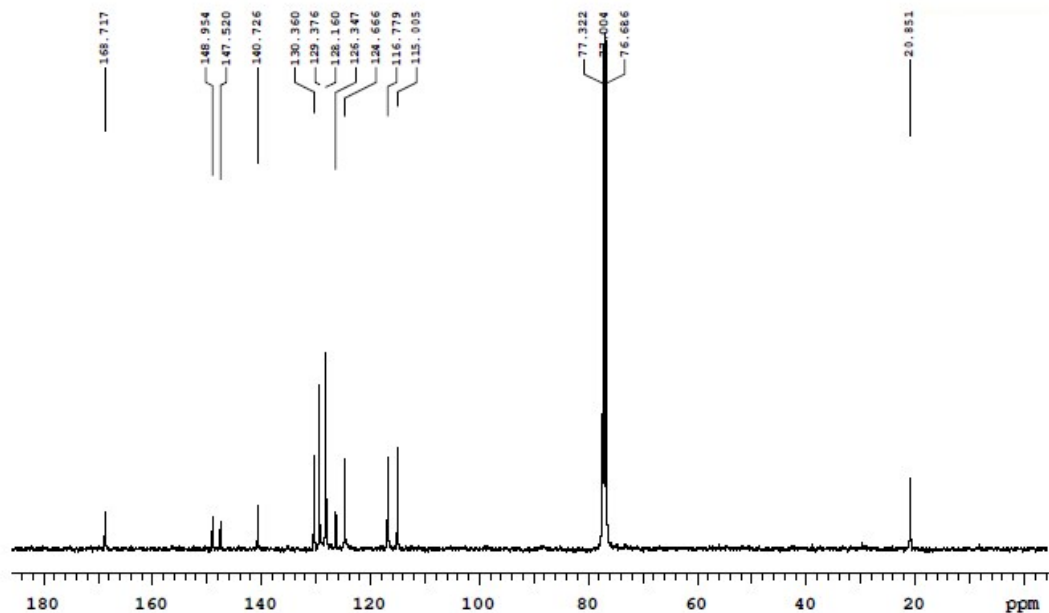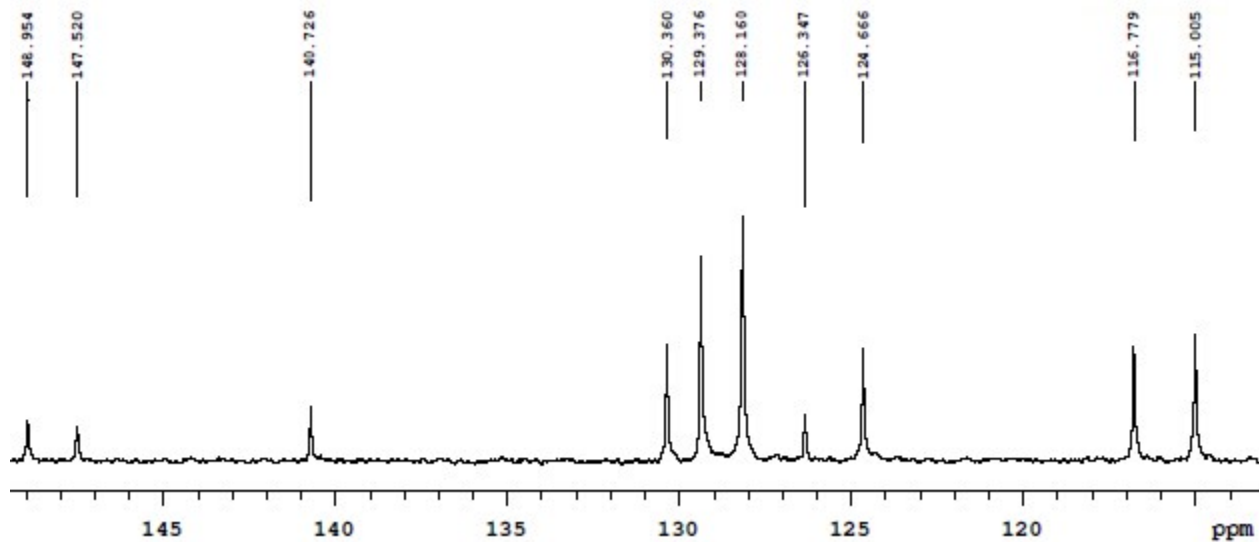

**Figure S26.**  $^{13}\text{C}$  NMR Spectra & its expansion for compound **3I** in  $\text{CDCl}_3$

NUCLEUS : H1  
 FREQ (MHz) : 399.63  
 AT (sec) : 2.27  
 SW (ppm) : 18.08  
 RD (sec) : 1.00  
 PW (usec) : 6.60  
 Scans : 64  
 Solvent : cdcl3  
 Data Points : 32768  
 LB (Hz) : 1.00  
 TEMP (K) : 303.15  
 EXP : s2pul  
 DATE : Nov 4 2015  
 System : VNMR5\_400

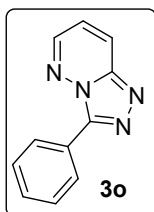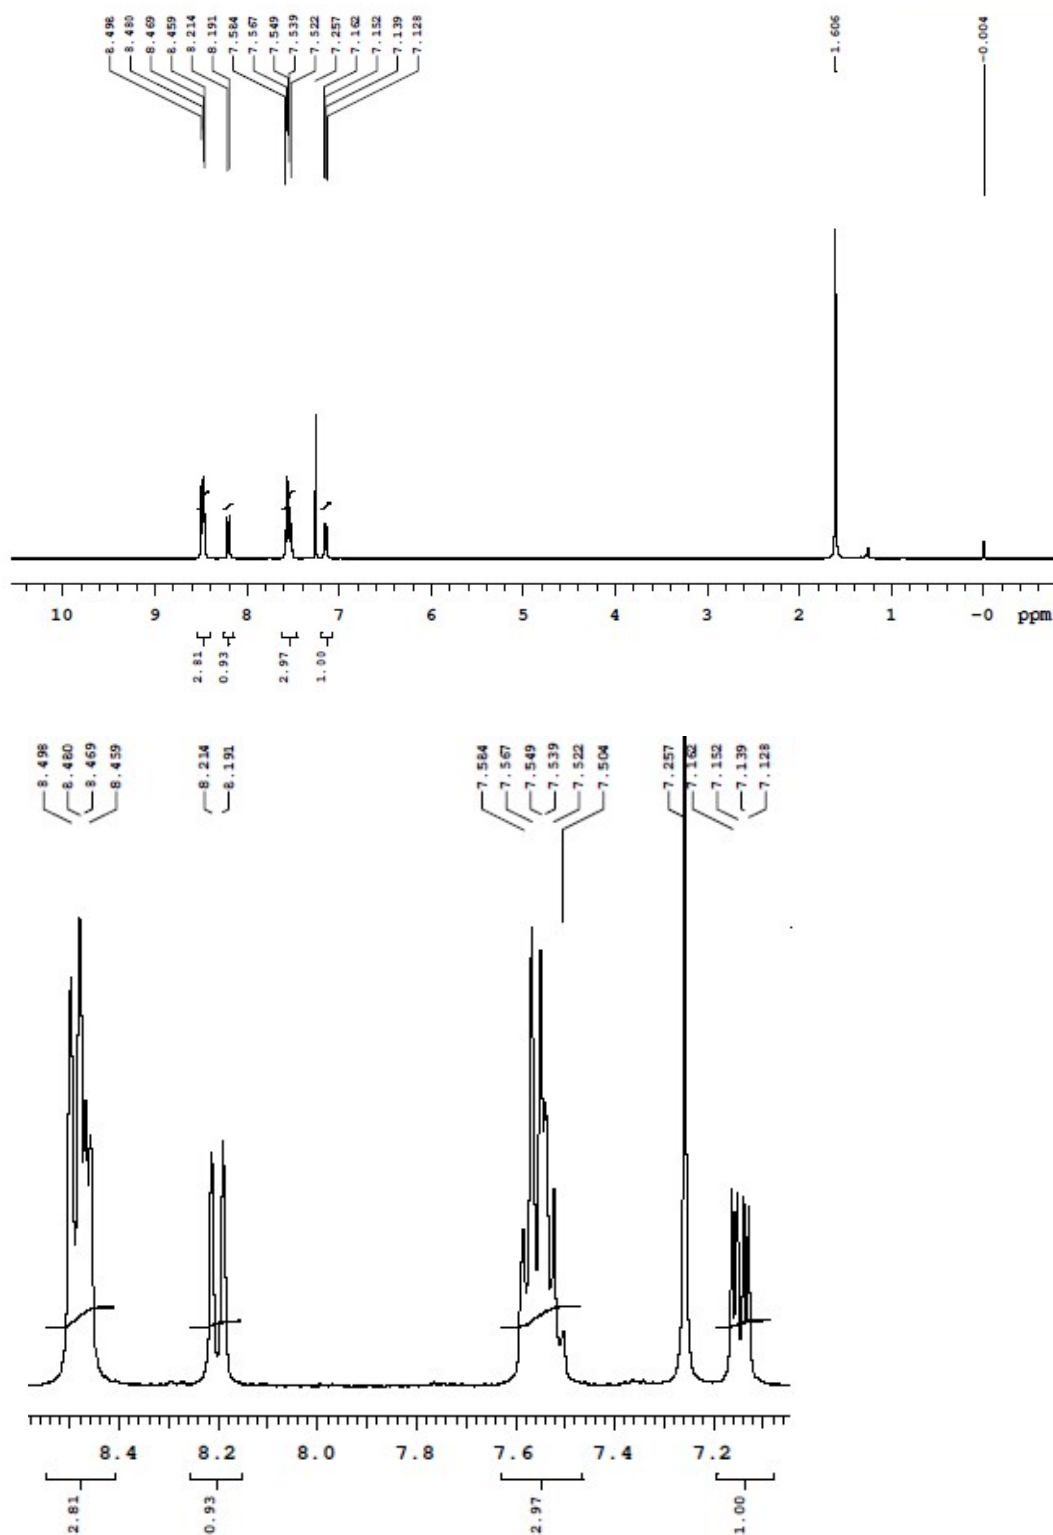

**Figure S27.** <sup>1</sup>H NMR Spectra & its expansion for compound **30** in CDCl<sub>3</sub>

NUCLEUS : C13  
FREQ (MHz) : 100.50  
AQ (sec) : 1.28  
SW (ppm) : 253.84  
RD (sec) : 1.00  
PW (usec) : 5.05  
Scans : 1500  
Solvent : cdc13  
Data Points : 65536  
LB (Hz) : 3.00  
TEMP (K) : 303.15  
EXP : s2pul  
DATE : Nov 20 2015  
System : VNMR-400

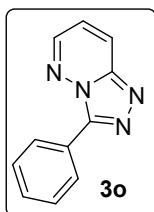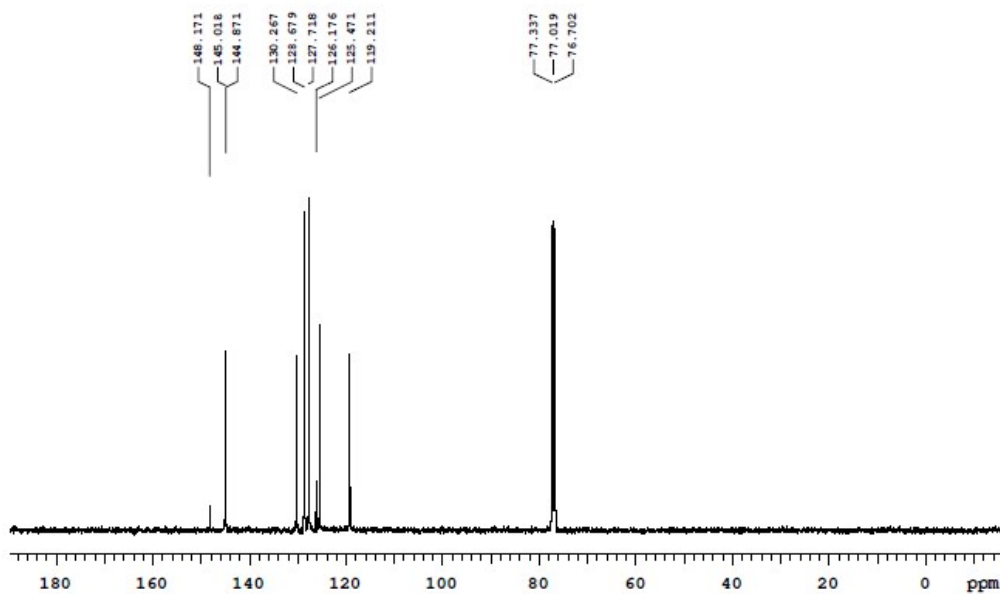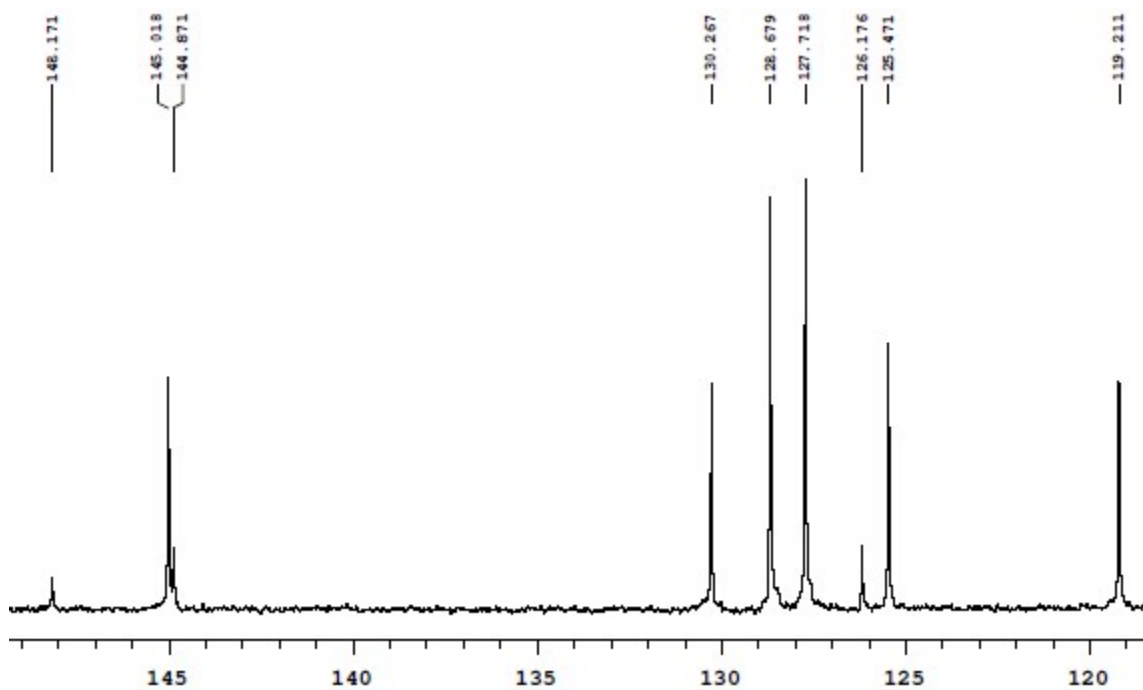

**Figure S28.**  $^{13}\text{C}$  NMR Spectra & its expansion for compound **3o** in  $\text{CDCl}_3$

NUCLEUS : H1  
 FREQ (MHz) : 399.63  
 AT (sec) : 2.27  
 SW (ppm) : 18.08  
 HD (sec) : 1.00  
 DW (usec) : 6.60  
 Scans : 64  
 Solvent : cdcl3  
 Data Points : 32768  
 LB (Hz) : 1.00  
 TEMP (K) : 303.15  
 EXP : s2pul  
 DATE : Nov 3 2015  
 System : VNMRS\_400

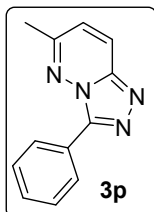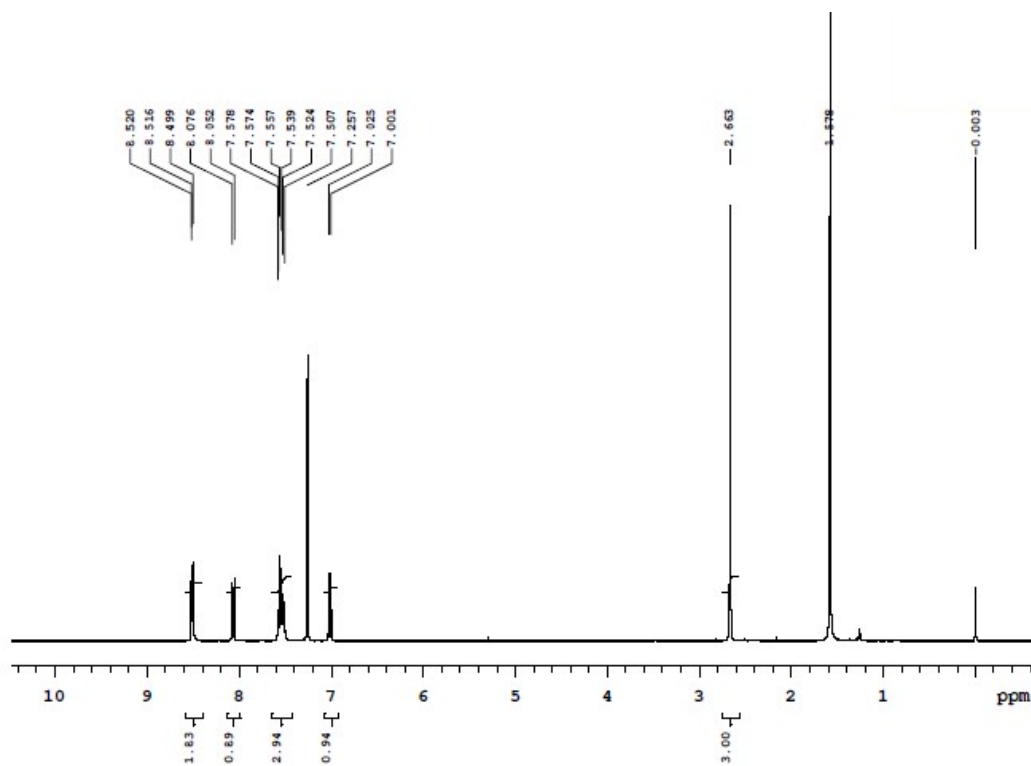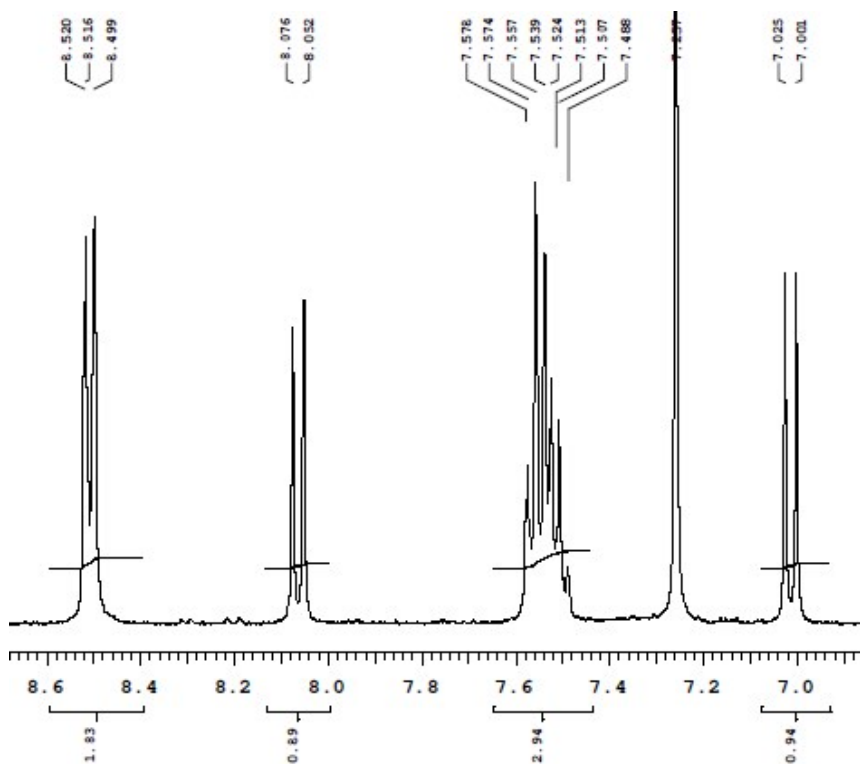

**Figure S29.**  $^1\text{H}$  NMR Spectra & its expansion for compound **3p** in  $\text{CDCl}_3$

NUCLEUS : C13  
 FRQ (MHz) : 100.50  
 AT (sec) : 1.28  
 SW (ppm) : 253.84  
 RD (sec) : 1.00  
 PW (usec) : 5.05  
 Scans : 1500  
 Solvent : cdcl3  
 Data Points : 65536  
 LB (Hz) : 4.00  
 TEMP (K) : 303.15  
 EXP : s2pul  
 DATE : Nov 21 2015  
 System : VNMR5\_400

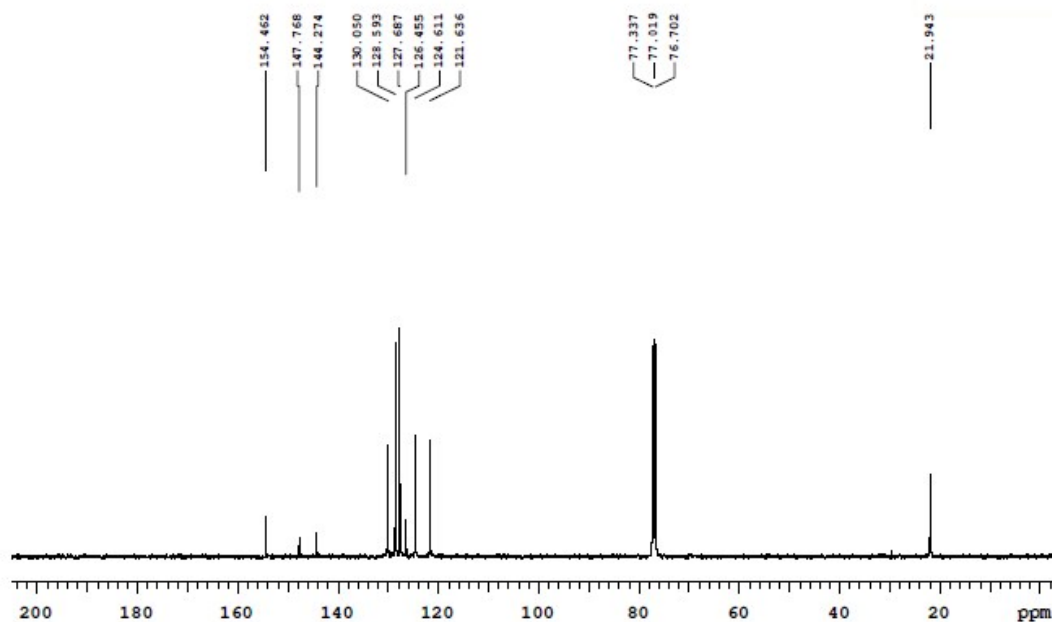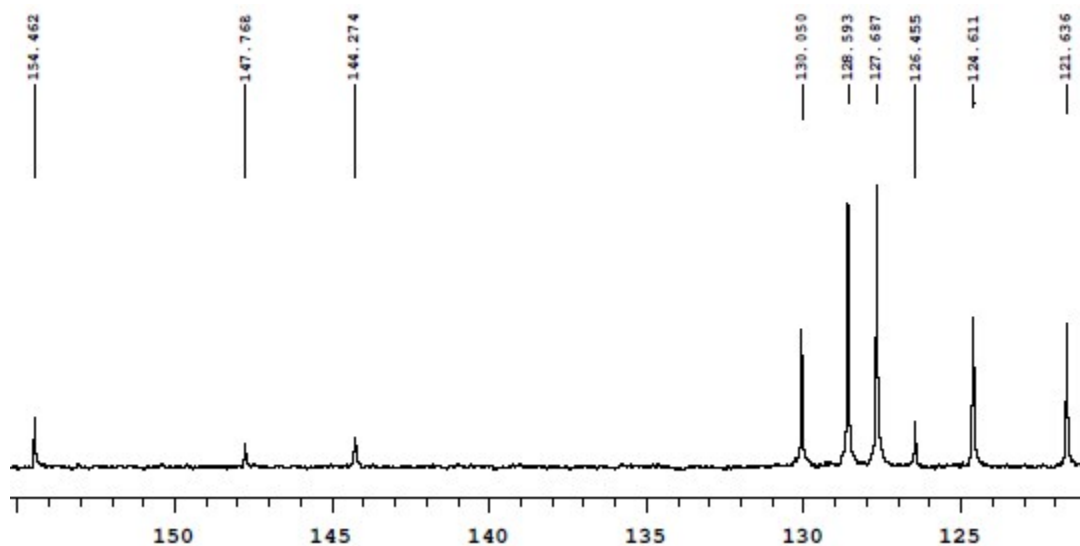

**Figure S30.**  $^{13}\text{C}$  NMR Spectra & its expansion for compound **3p** in  $\text{CDCl}_3$

NUCLEUS : H1  
 FREQ (MHz) : 399.64  
 AT (sec) : 2.27  
 SW (ppm) : 18.08  
 RD (sec) : 1.00  
 DW (usec) : 6.60  
 Scans : 64  
 Solvent : dms0  
 Data Points : 32768  
 LB (Hz) : 1.00  
 TEMP (K) : 303.15  
 EXP : s2pu1  
 DATE : Feb 18 2016  
 System : VNMR5\_400

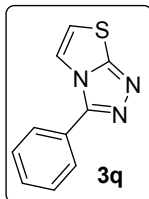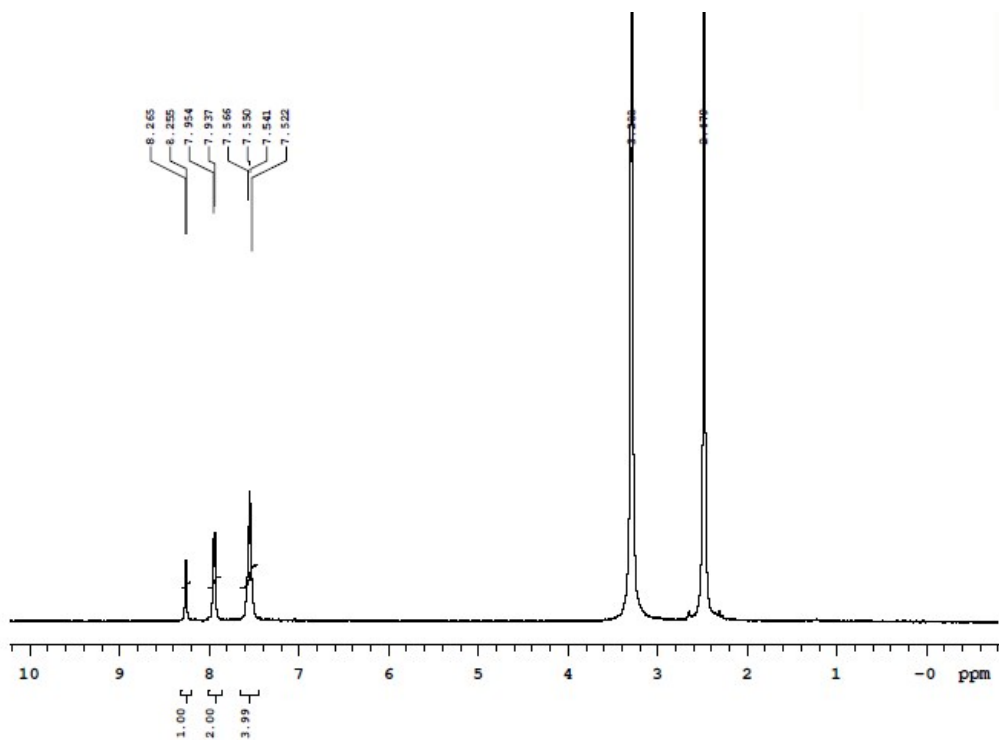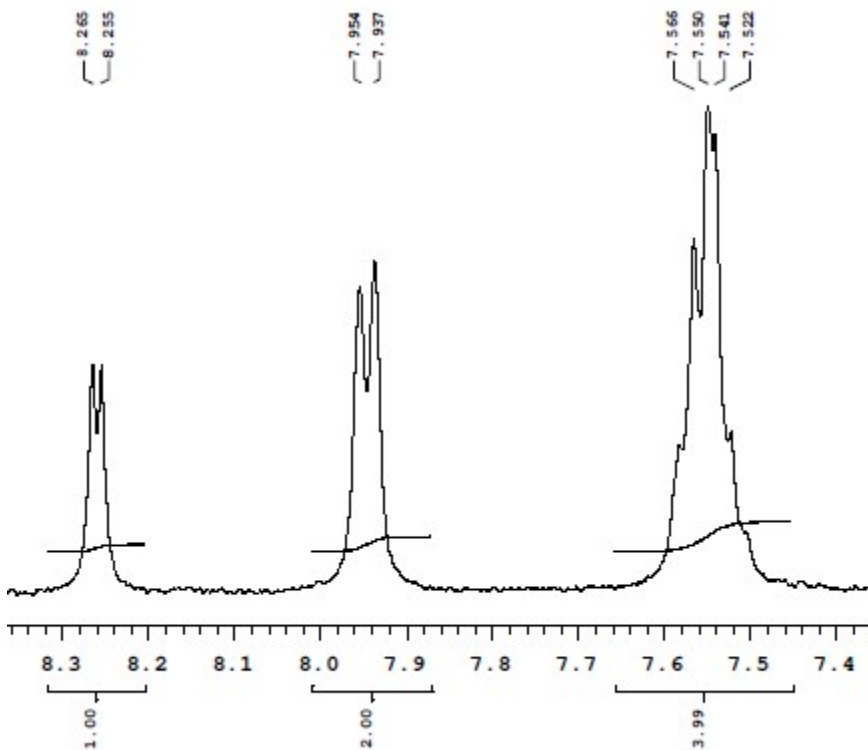

**Figure S31.**  $^1\text{H}$  NMR Spectra & its expansion for compound **3q** in  $\text{DMSO-}d_6$

NUCLEUS : C13  
 FRQ (MHz) : 100.50  
 AT (sec) : 1.28  
 SW (ppm) : 253.84  
 RD (sec) : 1.00  
 FWH (usec) : 5.05  
 Scans : 6000  
 Solvent : dmsc  
 Data Points : 65536  
 LB (Hz) : 8.00  
 TEMP (K) : 303.15  
 EXP : s2pul  
 DATE : Feb 19 2016  
 System : VNMR5\_400

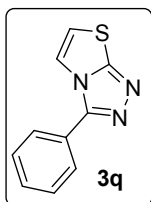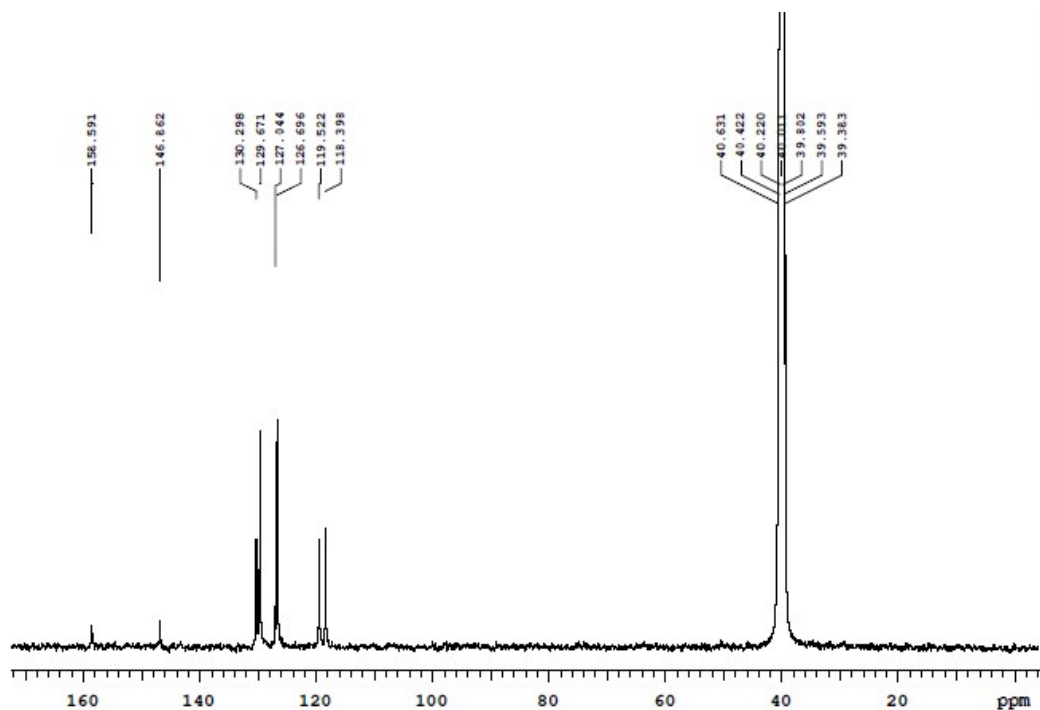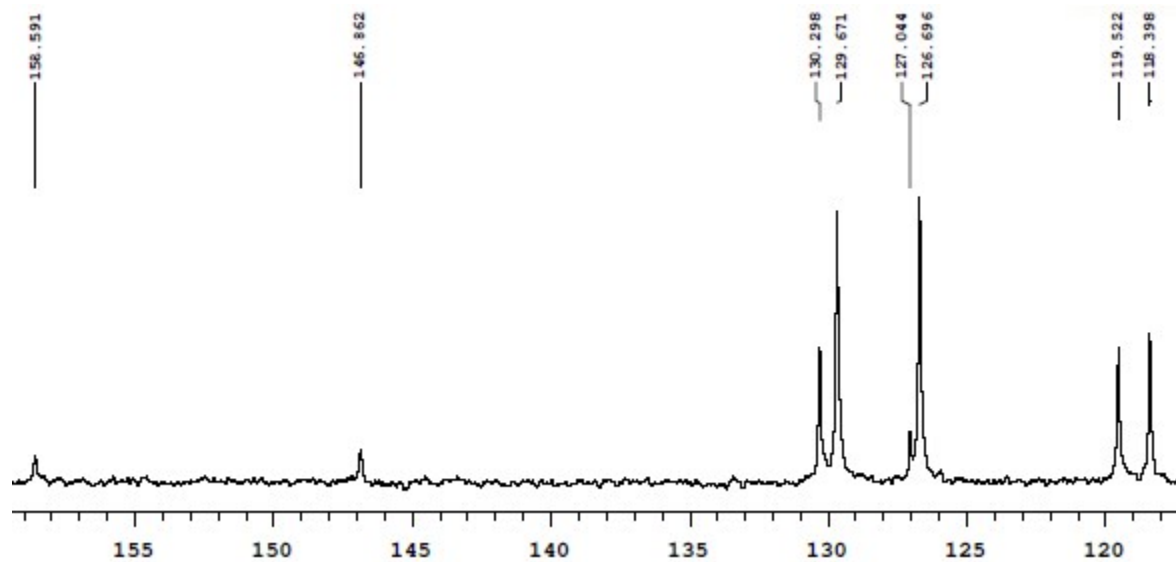

**Figure S32.**  $^{13}\text{C}$  NMR Spectra & its expansion for compound **3q** in  $\text{DMSO-}d_6$

NUCLEUS : H1  
 FREQ (MHz) : 399.64  
 AT (sec) : 2.27  
 SW (ppm) : 18.08  
 RD (sec) : 1.00  
 FWH (usec) : 6.60  
 Scans : 64  
 Solvent : dms0  
 Data Points : 32768  
 LB (Hz) : 1.00  
 TEMP (K) : 303.15  
 EXP : s2pa1  
 DATE : Sep 23 2015  
 System : VNMR5\_400

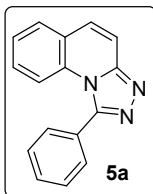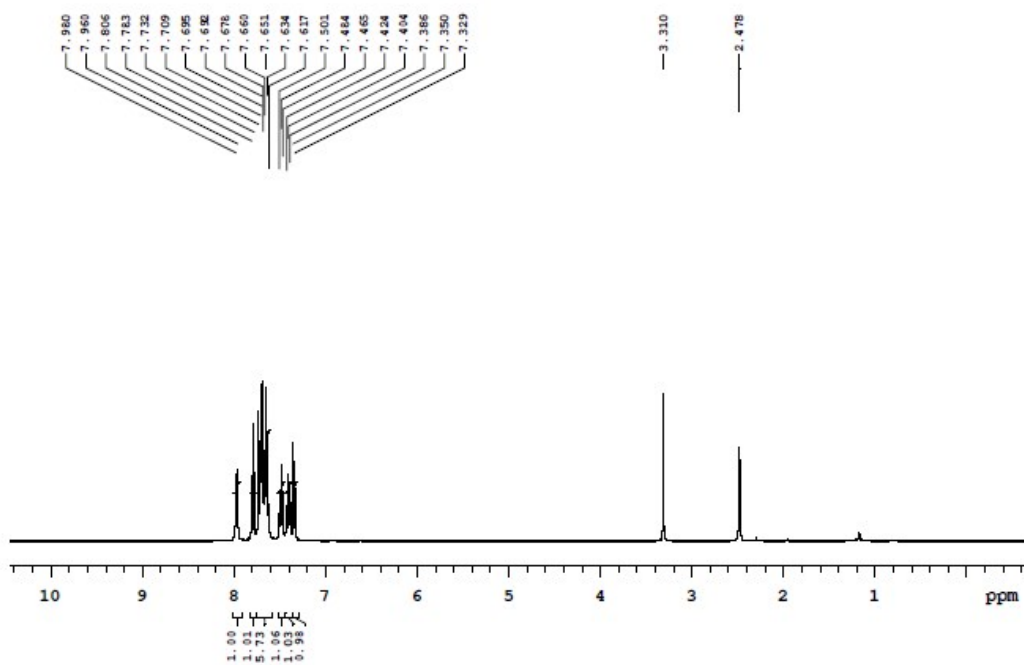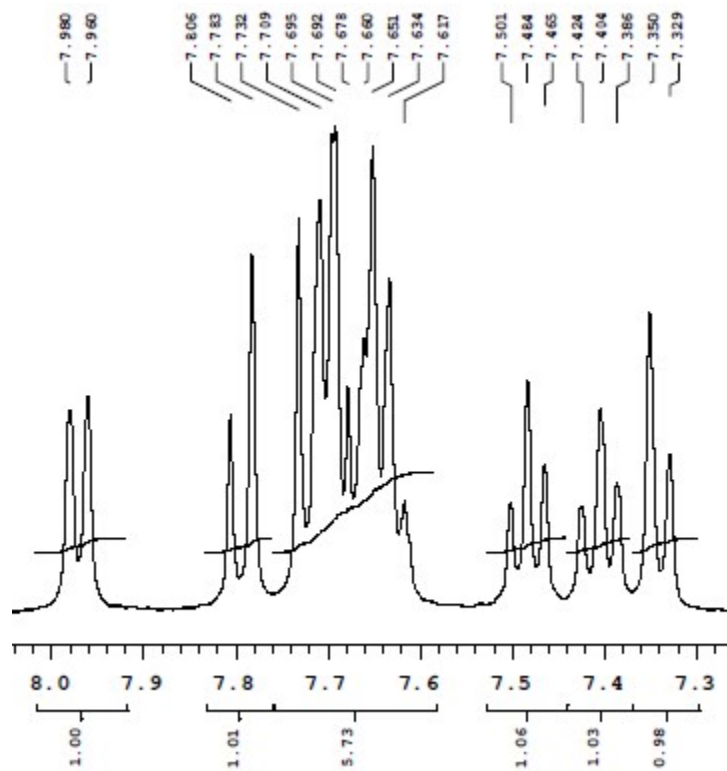

**Figure S33.**  $^1\text{H}$  NMR Spectra & its expansion for compound **5a** in  $\text{DMSO-}d_6$



NUCLEUS : C13  
 FREQ (MHz) : 100.50  
 AT (sec) : 1.28  
 SW (ppm) : 253.84  
 FD (sec) : 1.00  
 PW (usec) : 5.05  
 Scans : 1600  
 Solvent : dmsd  
 Data Points : 65536  
 LB (Hz) : 2.00  
 TEMP (K) : 303.15  
 EXP : s2pul  
 DATE : Sep 26 2015  
 System : VNMR5\_400

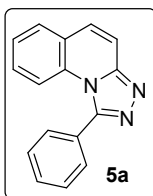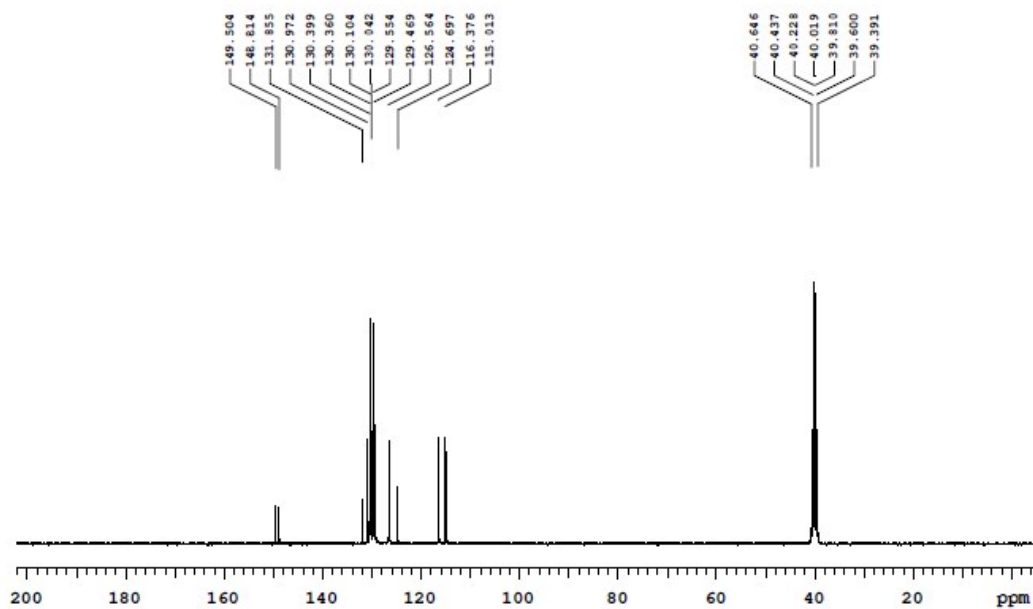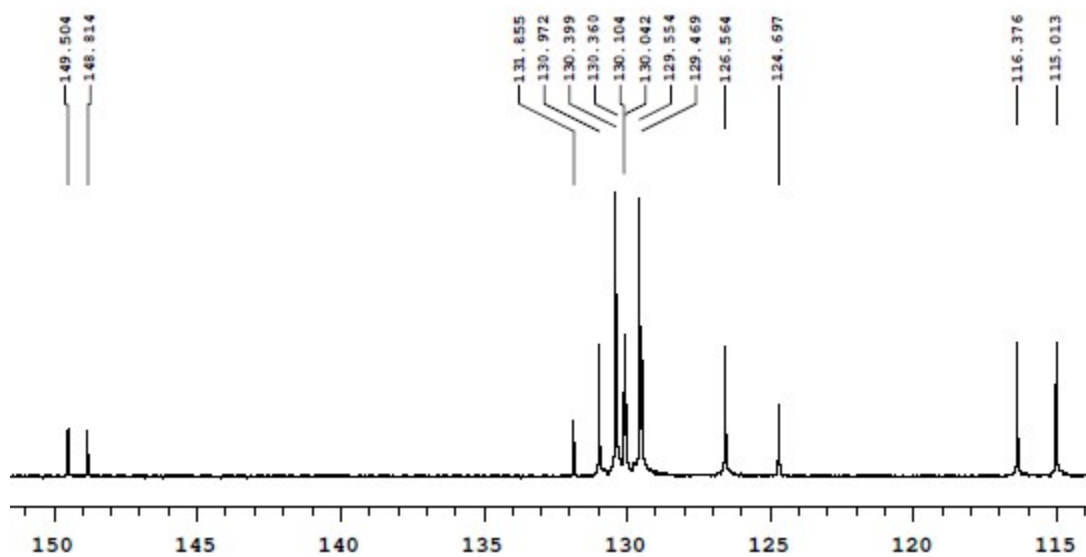

**Figure S34.**  $^{13}\text{C}$  NMR Spectra & its expansion for compound **5a** in  $\text{DMSO-}d_6$

NUCLEUS : H1  
 FREQ (MHz) : 399.64  
 AT (sec) : 2.27  
 SW (ppm) : 18.08  
 RD (sec) : 1.00  
 PW (usec) : 6.60  
 Scans : 64  
 Solvent : dmsc  
 Data Points : 32768  
 LB (Hz) : 2.00  
 TEMP (K) : 303.15  
 EXP : s2pul  
 DATE : Feb 12 2016  
 System : VNMR5\_400

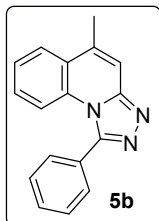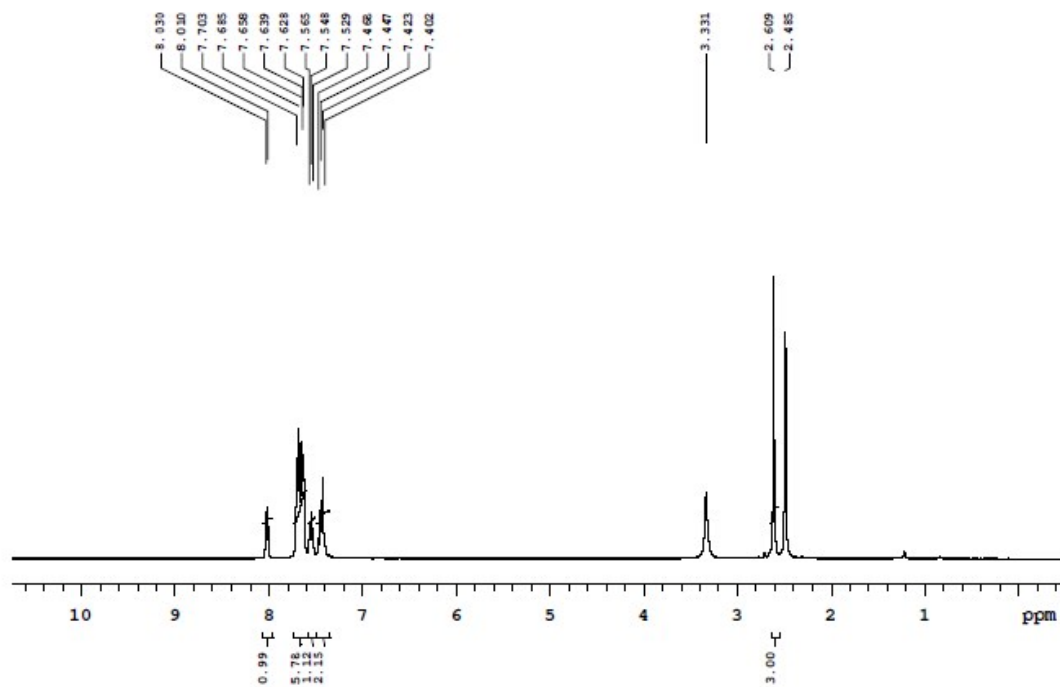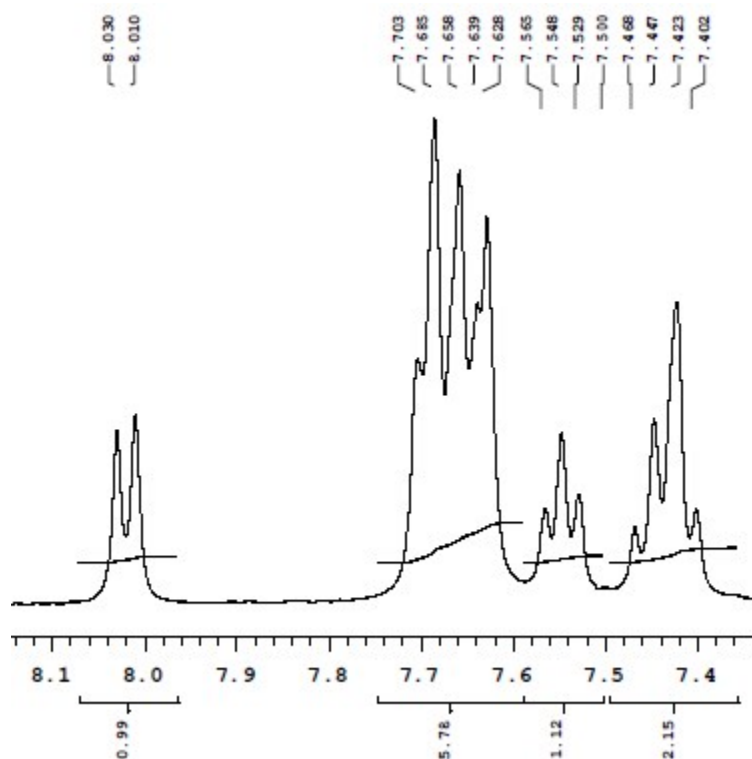

Figure S35.  $^1\text{H}$  NMR Spectra & its expansion for compound **5b** in  $\text{DMSO-}d_6$

NUCLEUS : C13  
 FREQ (MHz) : 100.50  
 AT (sec) : 1.28  
 SW (ppm) : 253.84  
 RD (sec) : 1.00  
 PW (usec) : 5.05  
 Scans : 2000  
 Solvent : dmsc  
 Data Points : 65536  
 LB (Hz) : 2.00  
 TEMP (K) : 303.15  
 EXP : s2pu1  
 DATE : Feb 13 2016  
 System : VNM6S\_400

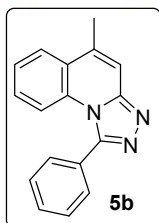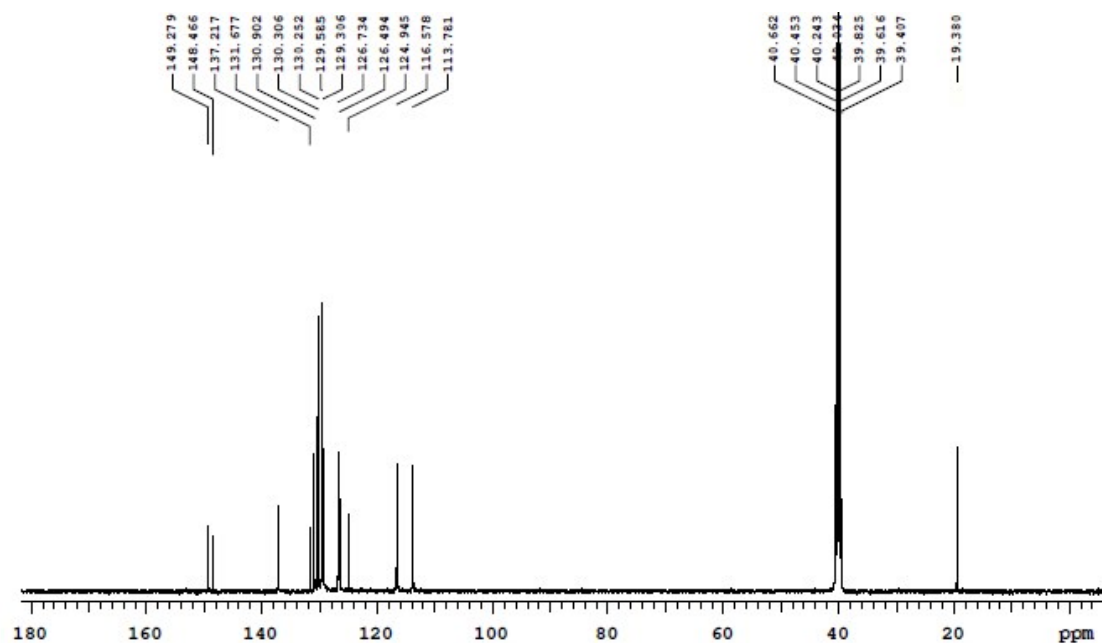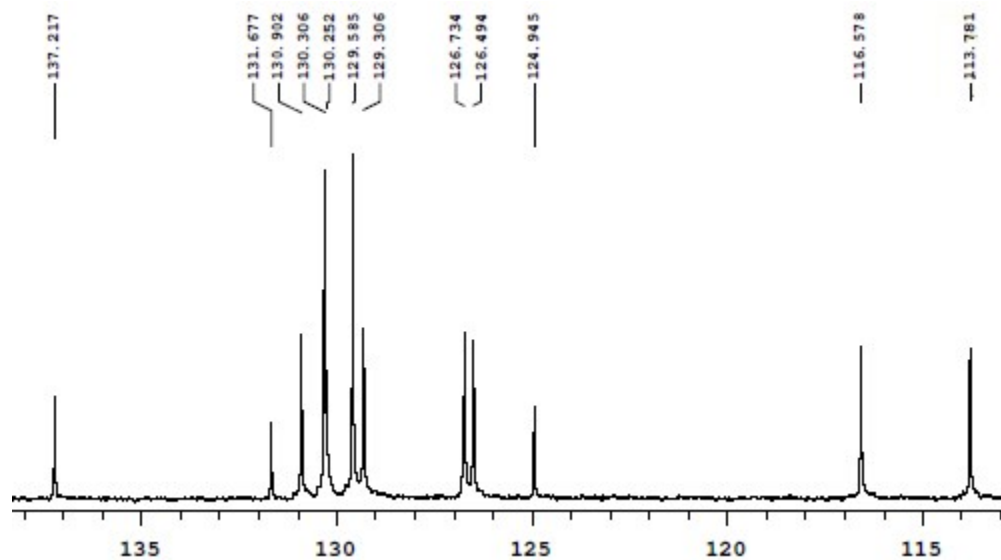

**Figure S36.**  $^{13}\text{C}$  NMR Spectra & its expansion for compound **5b** in  $\text{DMSO-}d_6$

NUCLEUS : H1  
 FREQ (MHz) : 399.63  
 AT (sec) : 2.27  
 SW (ppm) : 18.08  
 RD (sec) : 1.00  
 DW (usec) : 6.40  
 Scans : 32  
 Solvent : cdcl3  
 Data Points : 32768  
 LB (Hz) : 1.00  
 TEMP (K) : 303.15  
 EXP : s2pul  
 DATE : Nov 30 2015  
 System : VNMRS\_400

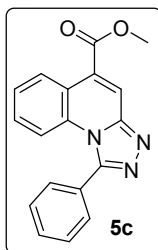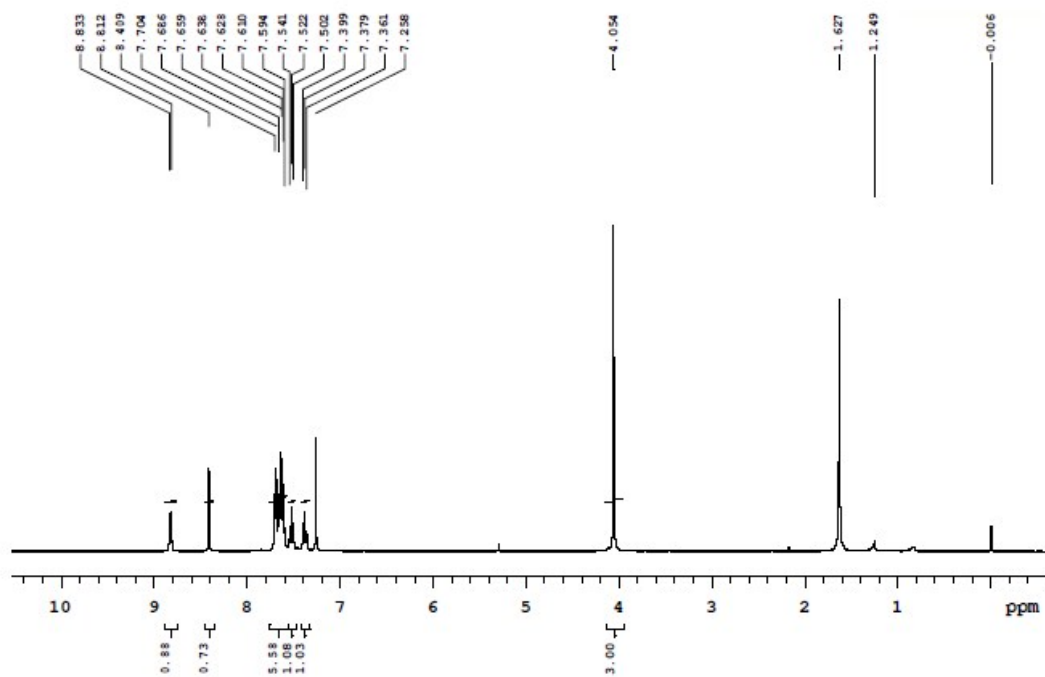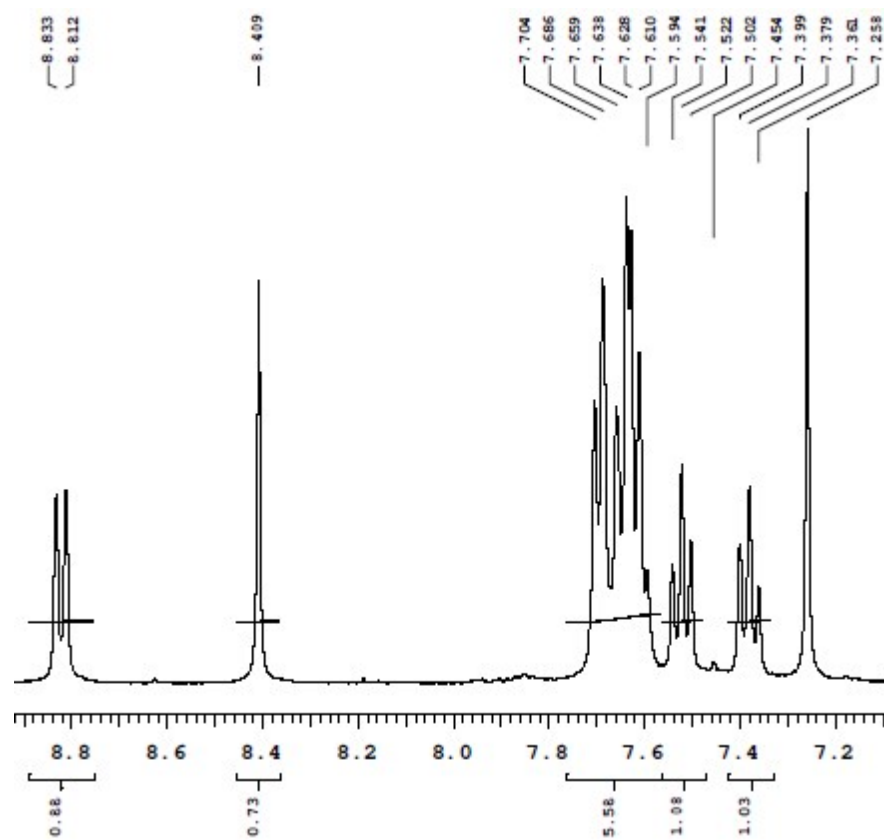

**Figure S37.**  $^1\text{H}$  NMR Spectra & its expansion for compound **5c** in  $\text{CDCl}_3$

NUCLEUS : C13  
 FREQ (MHz) : 100.50  
 AT (sec) : 1.28  
 SW (ppm) : 253.84  
 RD (sec) : 1.00  
 PW (usec) : 5.05  
 Scans : 6000  
 Solvent : cdcl3  
 Data Points : 65536  
 LB (Hz) : 2.00  
 TEMP (K) : 303.15  
 EXP : s2pul  
 DATE : Dec 5 2015  
 System : VNMR5\_400

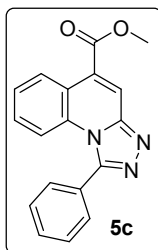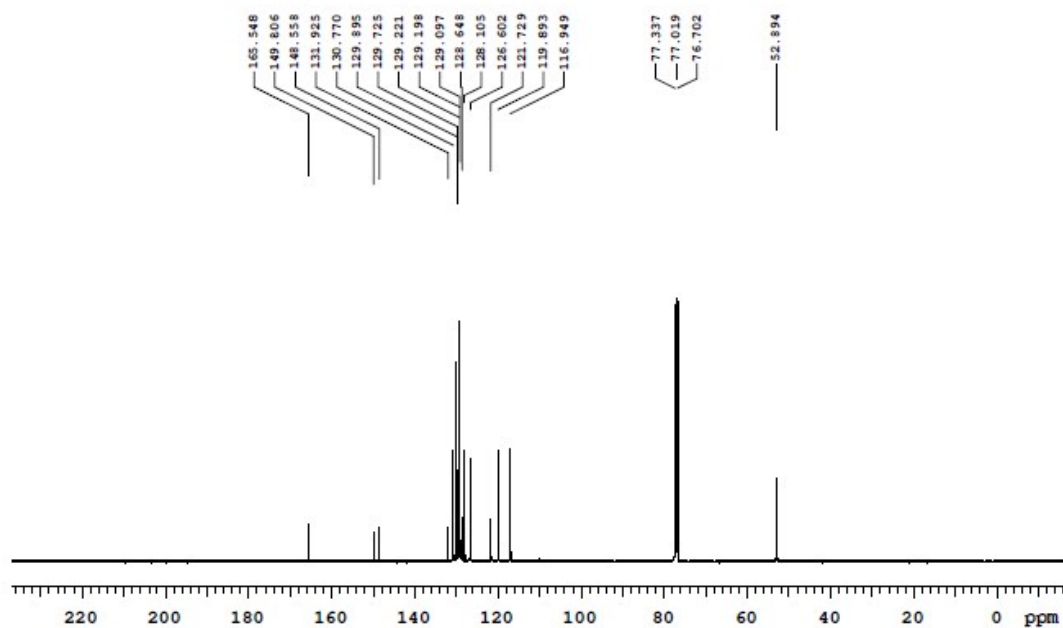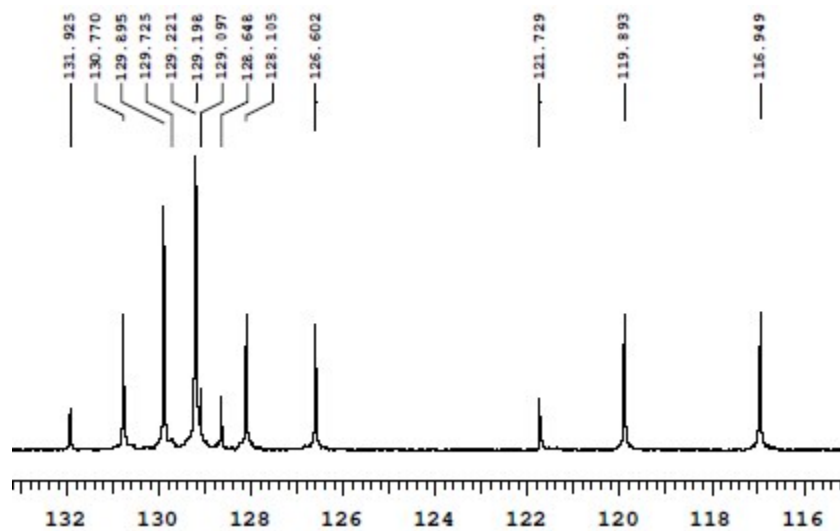

Figure S38.  $^{13}\text{C}$  NMR Spectra & its expansion for compound **5c** in  $\text{CDCl}_3$

NUCLEUS : H1  
 FRQ (MHz) : 399.64  
 AT (sec) : 2.27  
 SW (ppm) : 18.08  
 RD (sec) : 1.00  
 DW (usec) : 6.60  
 Scans : 64  
 Solvent : dmsc  
 Data Points : 32768  
 LB (Hz) : 2.00  
 TEMP (K) : 303.15  
 EXP : s2pul  
 DATE : Feb 12 2016  
 System : VNMR\_400

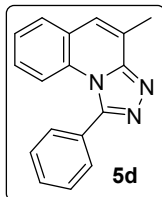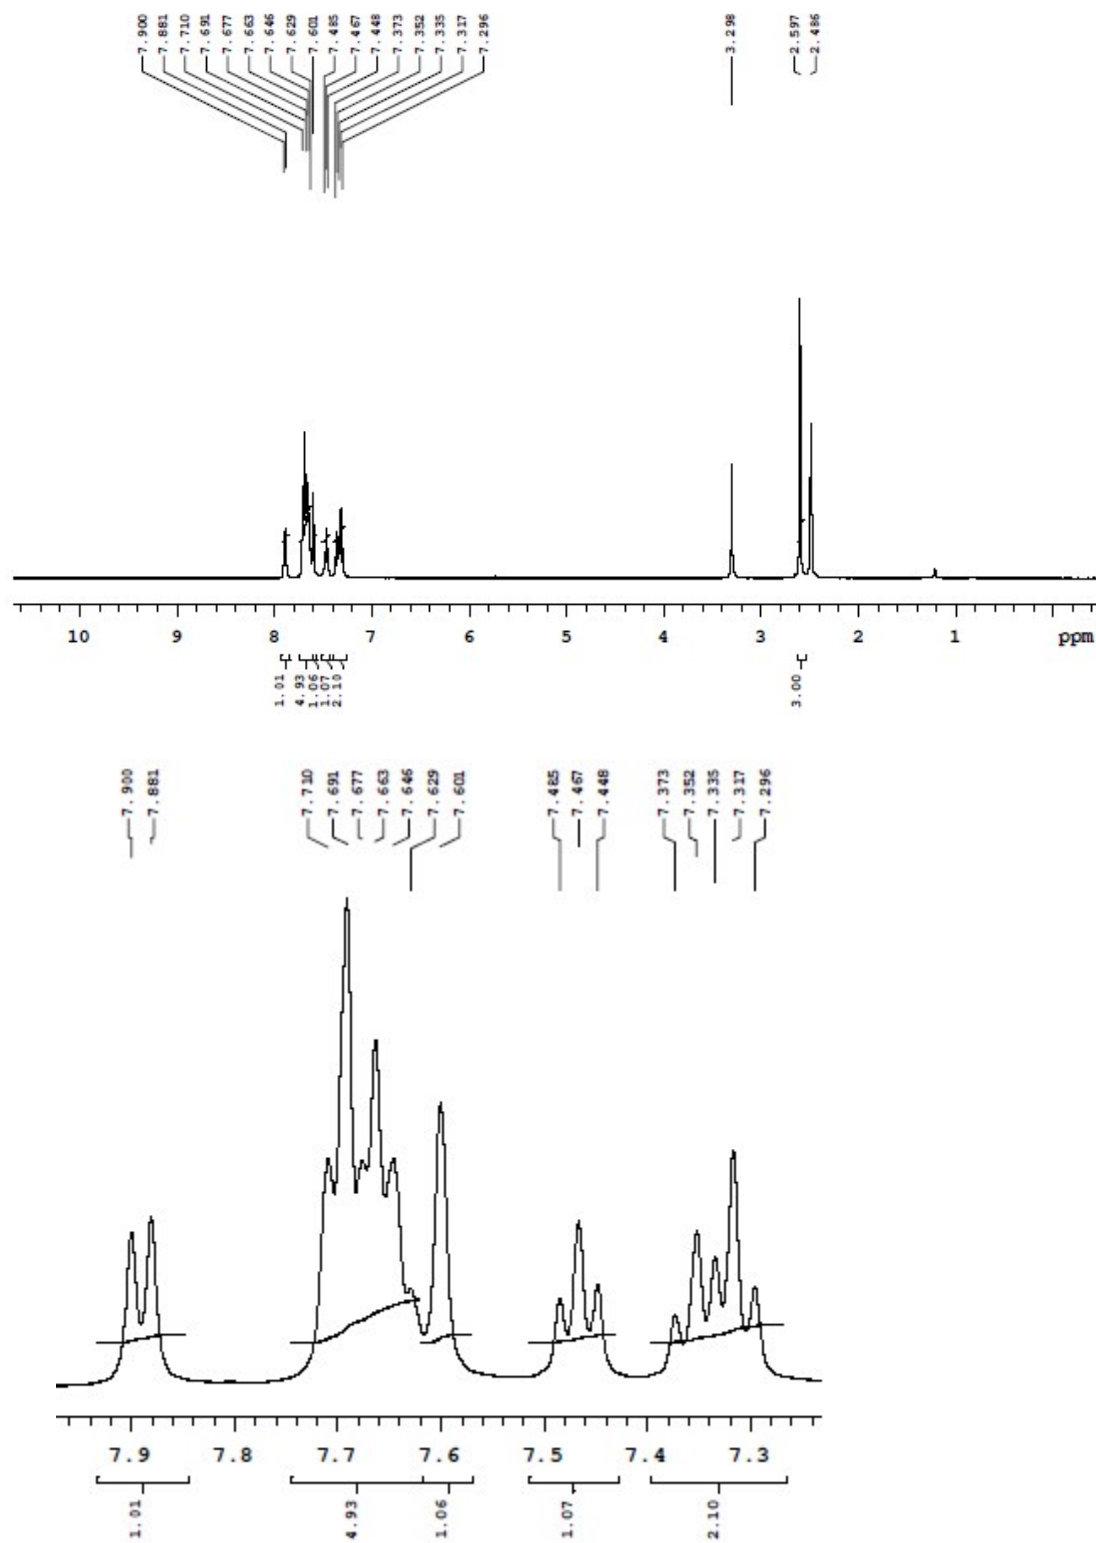

**Figure S39.**  $^1\text{H}$  NMR Spectra & its expansion for compound **5d** in  $\text{DMSO-}d_6$

NUCLEUS : C13  
 FREQ (MHz) : 100.50  
 AT (sec) : 1.28  
 SW (ppm) : 253.84  
 RD (sec) : 1.00  
 FWH (usec) : 5.05  
 Scans : 2000  
 Solvent : DMSO  
 Data Points : 65536  
 LB (Hz) : 2.00  
 TEMP (K) : 303.15  
 EXP : s2pul  
 DATE : Feb 13 2016  
 System : VNMR\_400

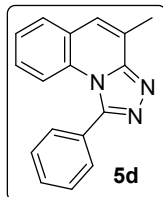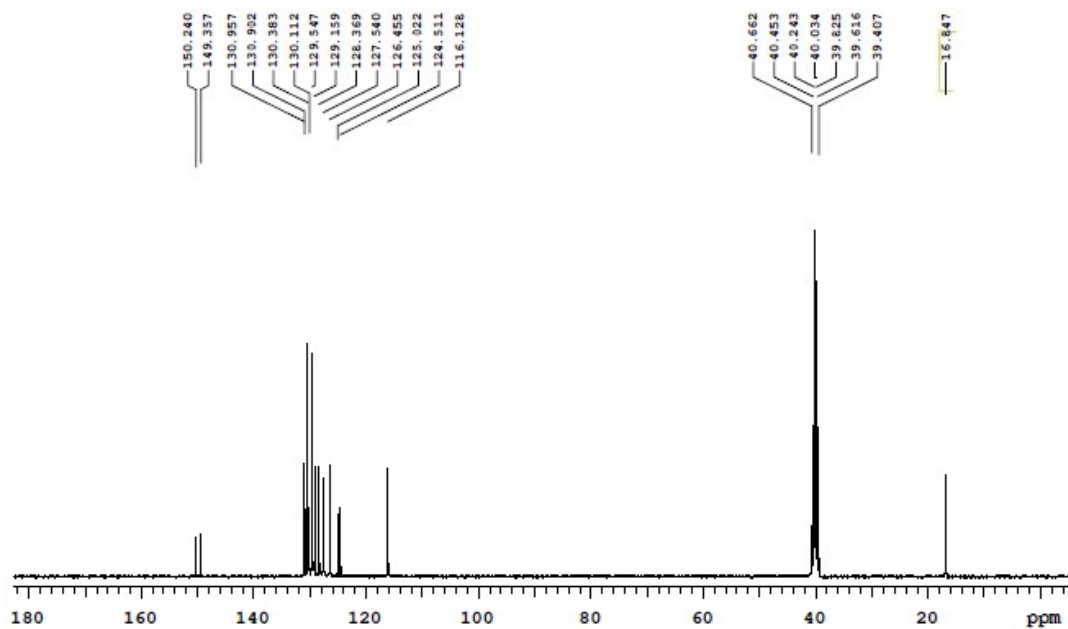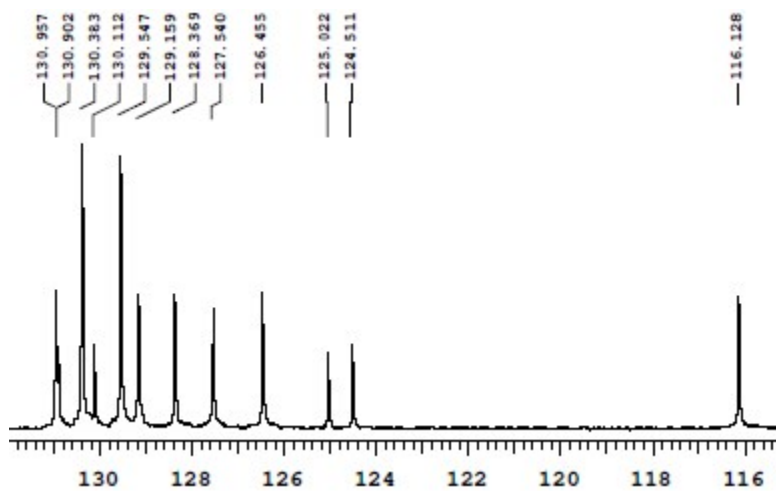

**Figure S40.**  $^{13}\text{C}$  NMR Spectra & its expansion for compound **5d** in  $\text{DMSO-}d_6$

NUCLEUS : H1  
 FREQ (MHz) : 399.63  
 AT (sec) : 2.27  
 SW (ppm) : 18.08  
 RD (sec) : 1.00  
 FWH (sec) : 6.60  
 Scans : 64  
 Solvent : cdcl3  
 Data Points : 32768  
 LB (Hz) : 1.00  
 TEMP (K) : 303.15  
 EXP : s2pul  
 DATE : Nov 4 2015  
 System : VNMR5\_400

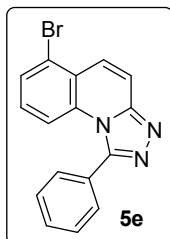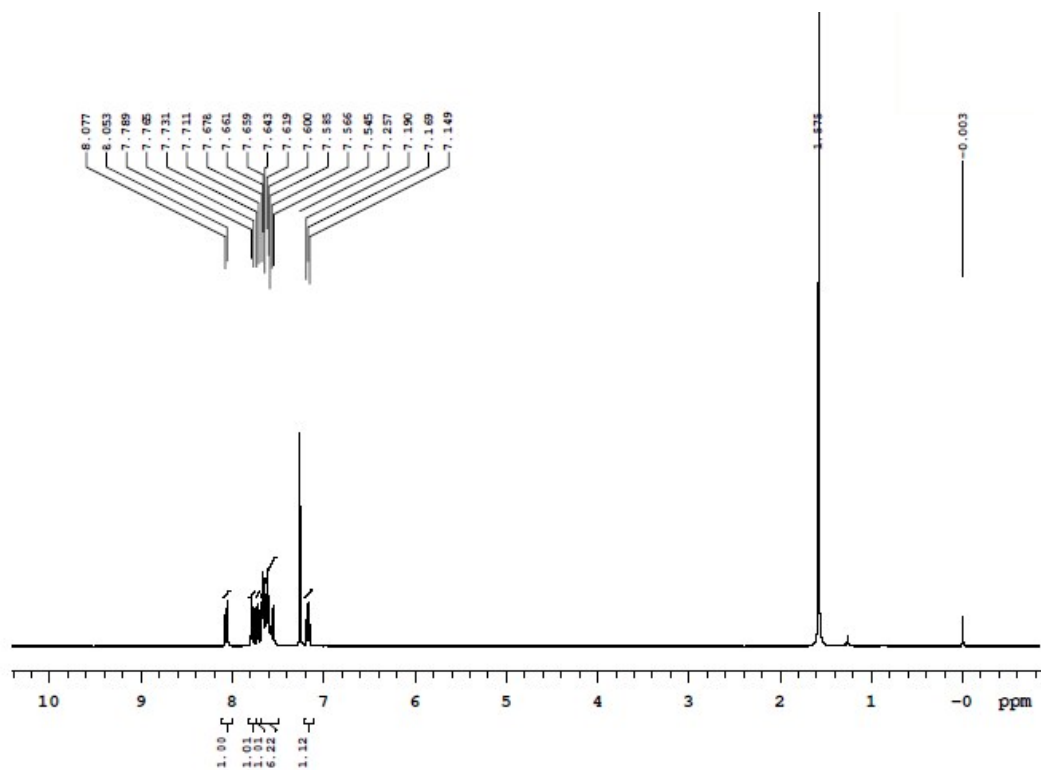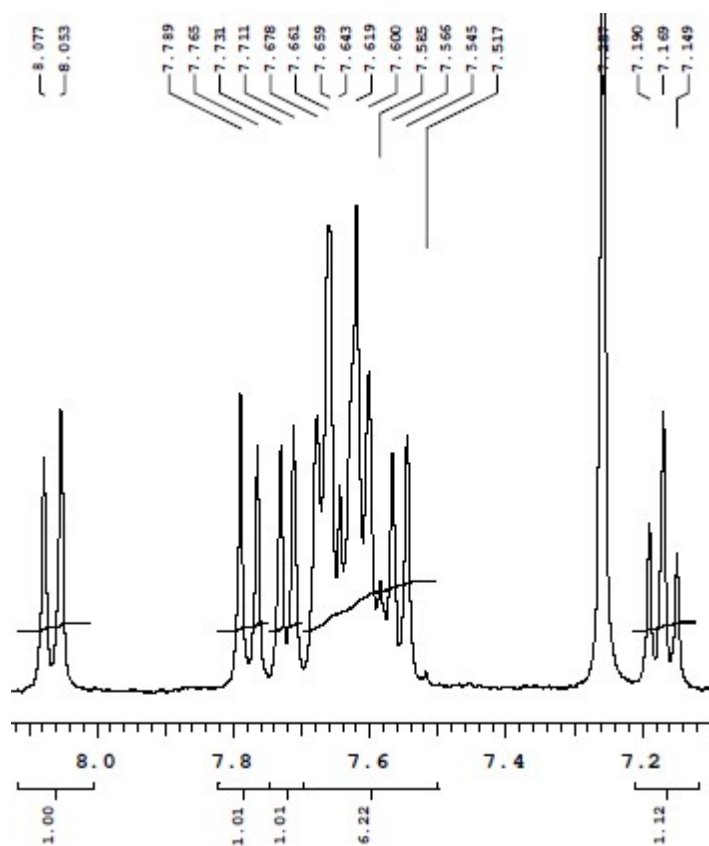

**Figure S41.**  $^1\text{H}$  NMR Spectra & its expansion for compound **5e** in  $\text{CDCl}_3$



NUCLEUS : C13  
 FRQ (MHz) : 100.50  
 AT (sec) : 1.28  
 SW (ppm) : 253.84  
 RD (sec) : 1.00  
 DW (usec) : 5.05  
 Scans : 2000  
 Solvent : cdcl3  
 Data Points : 65536  
 LB (Hz) : 5.00  
 TEMP (K) : 303.15  
 EXP : s2p01  
 DATE : Nov 21 2015  
 System : VNMR5\_400

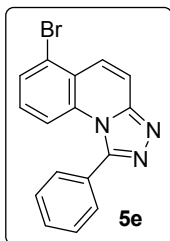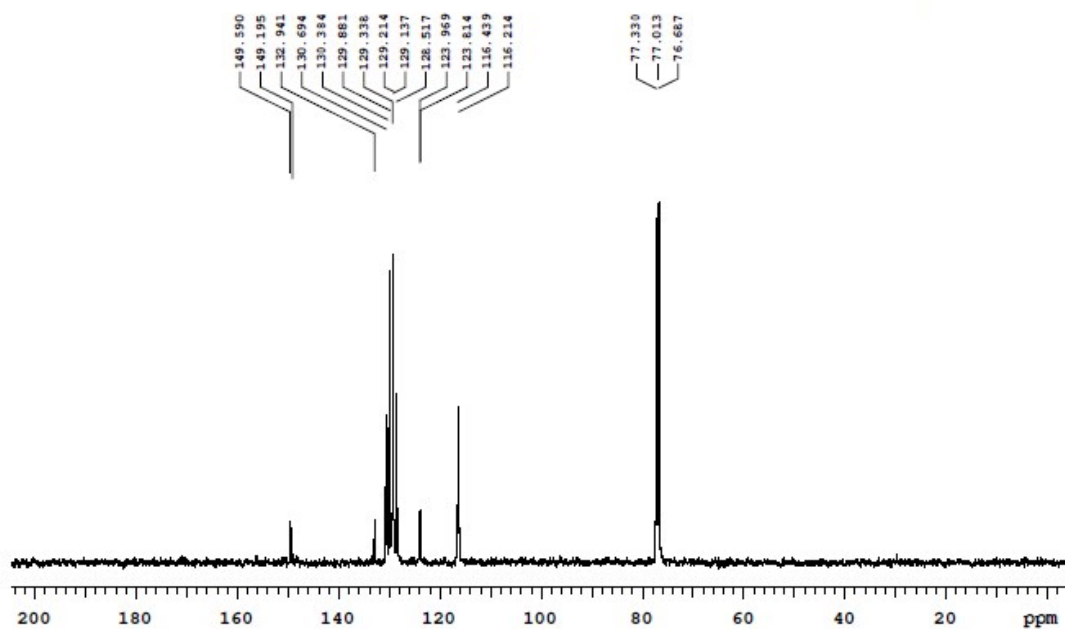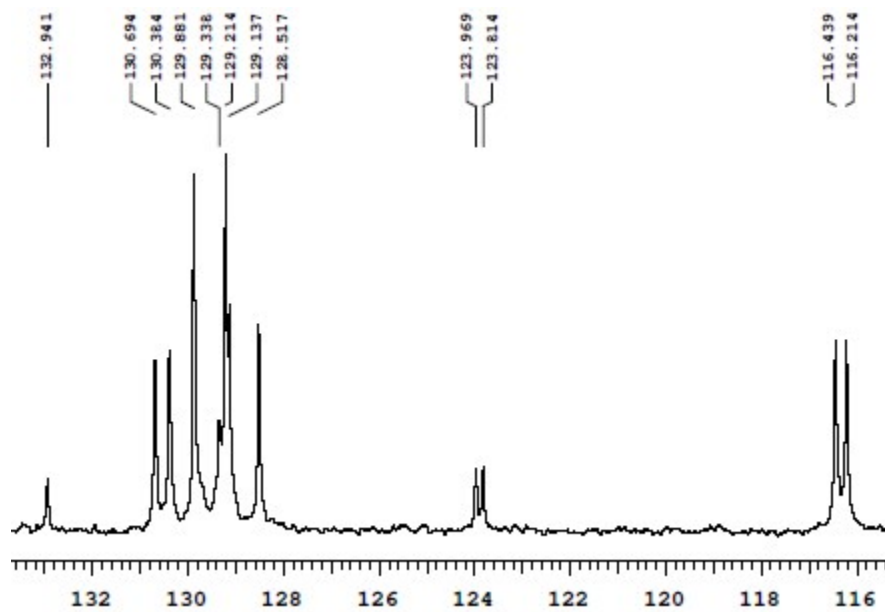

Figure S42.  $^{13}\text{C}$  NMR Spectra & its expansion for compound **5e** in  $\text{CDCl}_3$

NUCLEUS : H1  
 FREQ (MHz) : 399.63  
 AT (sec) : 2.27  
 SW (ppm) : 18.08  
 RD (sec) : 1.00  
 FWH (usec) : 6.60  
 Scans : 64  
 Solvent : cdcl3  
 Data Points : 32768  
 LB (Hz) : 2.00  
 TEMP (K) : 303.15  
 EXP : s2pul  
 DATE : Nov 17 2015  
 System : VNMR5\_400

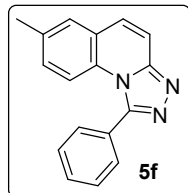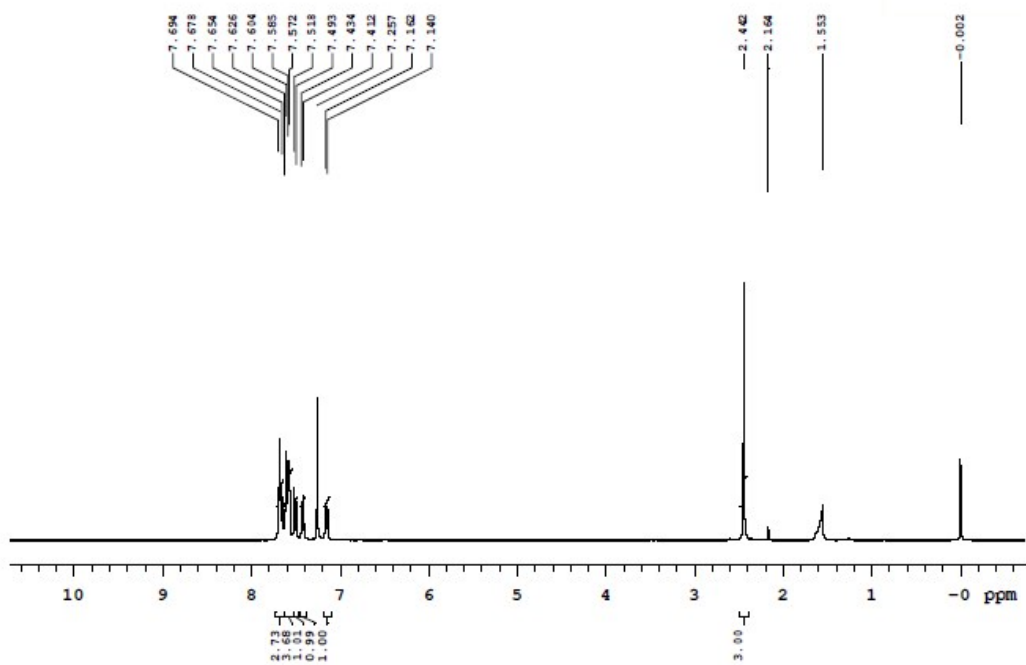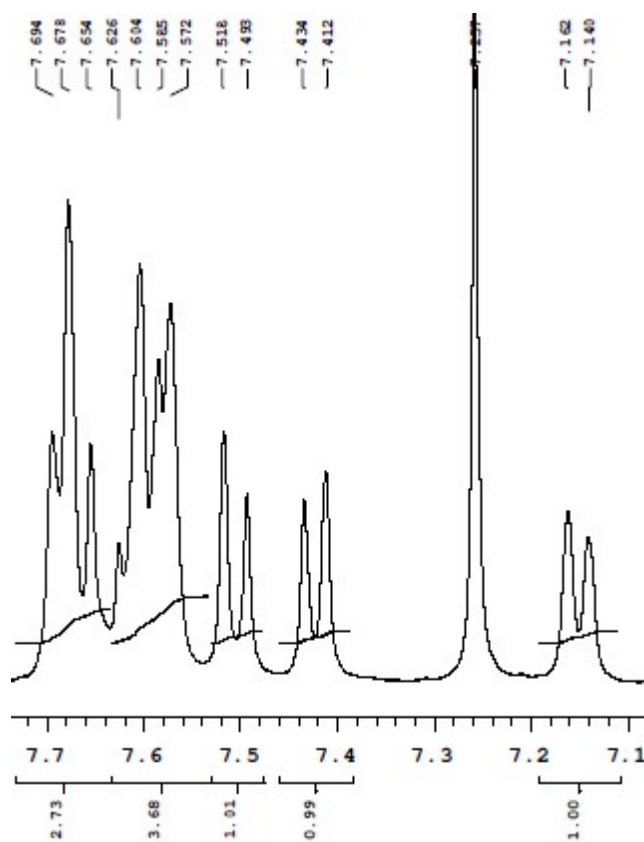

**Figure S43.**  $^1\text{H}$  NMR Spectra & its expansion for compound **5f** in  $\text{CDCl}_3$

NUCLEUS : C13  
FRQ (MHz) : 100.50  
AT (sec) : 1.28  
SW (ppm) : 253.84  
RD (sec) : 1.00  
FID (usec) : 5.05  
Scans : 2400  
Solvent : cdcl3  
Data Points : 65536  
LB (Hz) : 4.00  
TEMP (K) : 303.15  
EXP : s2pul  
DATE : Nov 20 2015  
System : VNMR5\_400

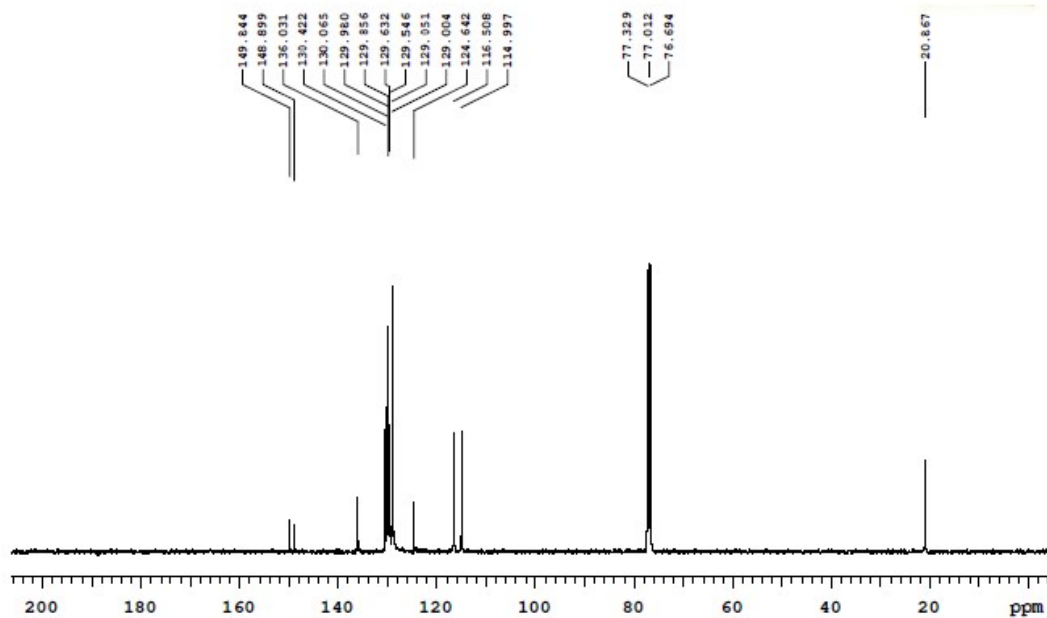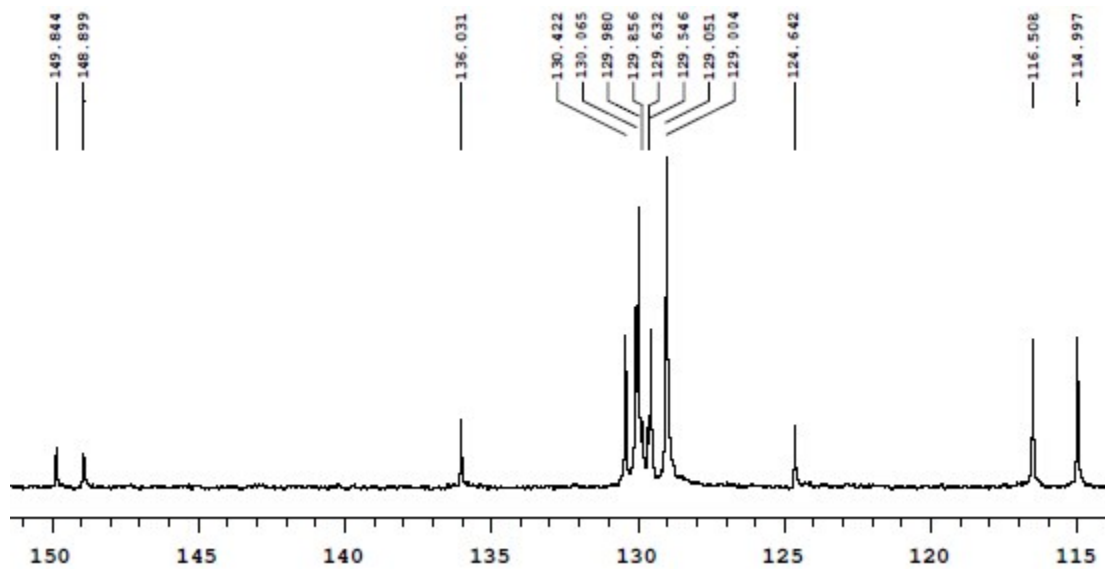

**Figure S44.**  $^{13}\text{C}$  NMR Spectra & its expansion for compound **5f** in  $\text{CDCl}_3$

NUCLEUS : H1  
 FREQ (MHz) : 399.63  
 AT (sec) : 2.27  
 SW (ppm) : 18.08  
 RD (sec) : 1.00  
 FWH (usec) : 6.60  
 Scans : 64  
 Solvent : cdcl3  
 Data Points : 32768  
 LB (Hz) : 2.00  
 TEMP (K) : 303.15  
 EXP : e2pul  
 DATE : Nov 4 2015  
 System : VNMR5\_400

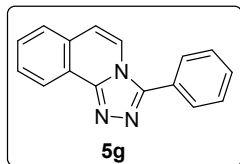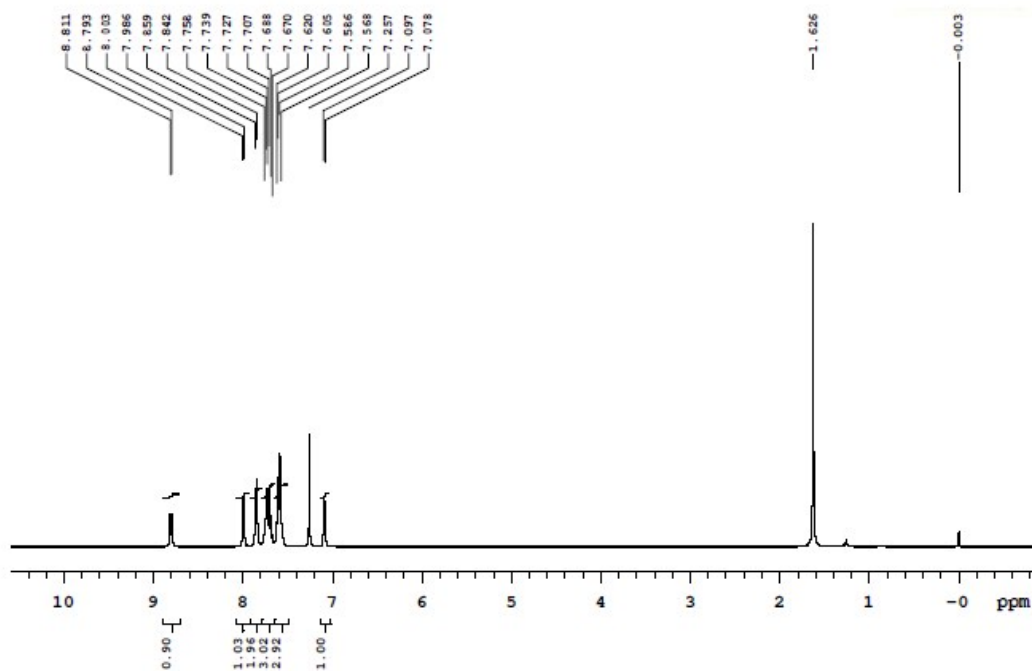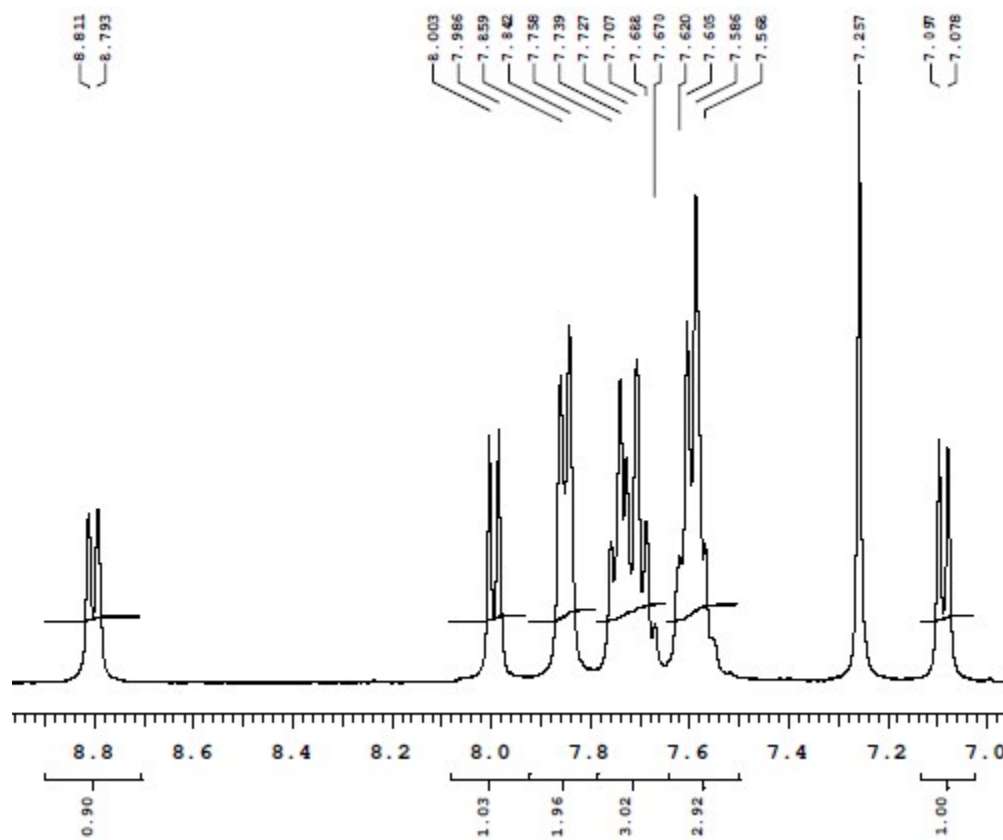

Figure S45.  $^1\text{H}$  NMR Spectra & its expansion for compound **5g** in  $\text{CDCl}_3$

NUCLEUS : C13  
 FREQ (MHz) : 100.50  
 AT (sec) : 1.28  
 SW (ppm) : 253.84  
 RD (sec) : 1.00  
 PW (usec) : 5.05  
 Scans : 1500  
 Solvent : cdcl3  
 Data Points : 65536  
 LB (Hz) : 3.00  
 TEMP (K) : 303.15  
 EXP : s2pul  
 DATE : Nov 20 2015  
 System : VNMR5\_400

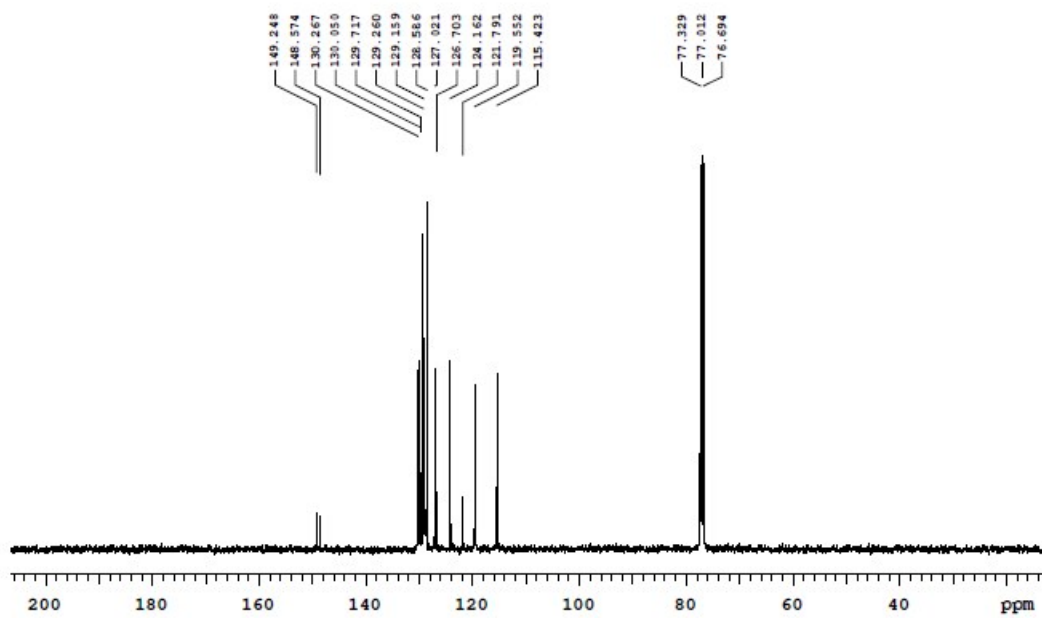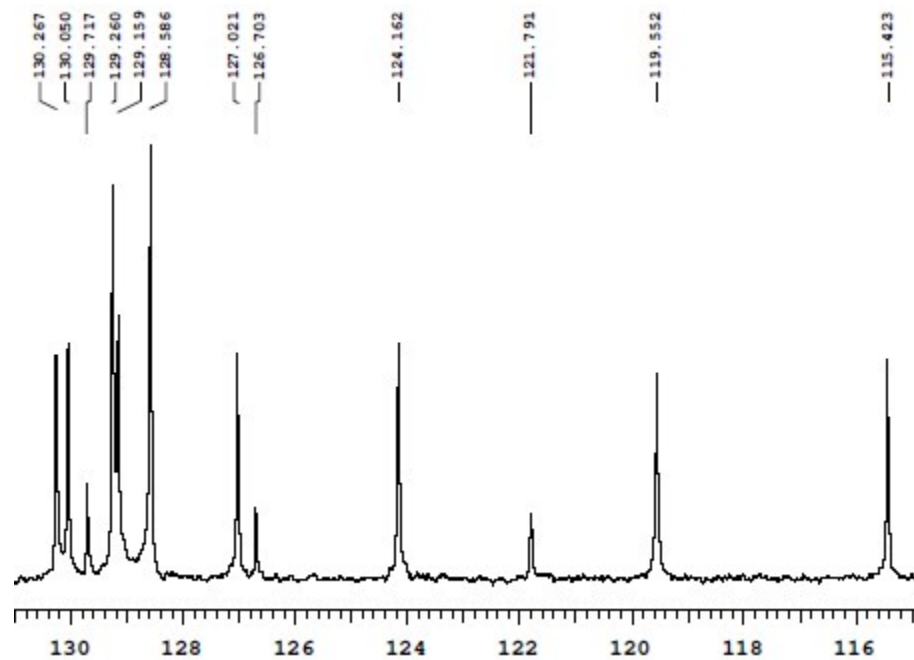

**Figure S46.**  $^{13}\text{C}$  NMR Spectra & its expansion for compound **5g** in  $\text{CDCl}_3$

NUCLEUS : H1  
 FRQ (MHz) : 399.64  
 AT (sec) : 2.27  
 SW (ppm) : 18.08  
 RD (sec) : 1.00  
 FWH (usec) : 6.60  
 Scans : 64  
 Solvent : dmsc  
 Data Points : 32768  
 LB (Hz) : 1.00  
 TEMP (K) : 303.15  
 EXP : s2pul  
 DATE : Feb 12 2016  
 System : VNMR5\_400

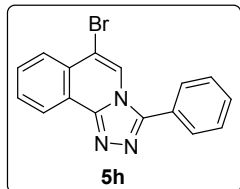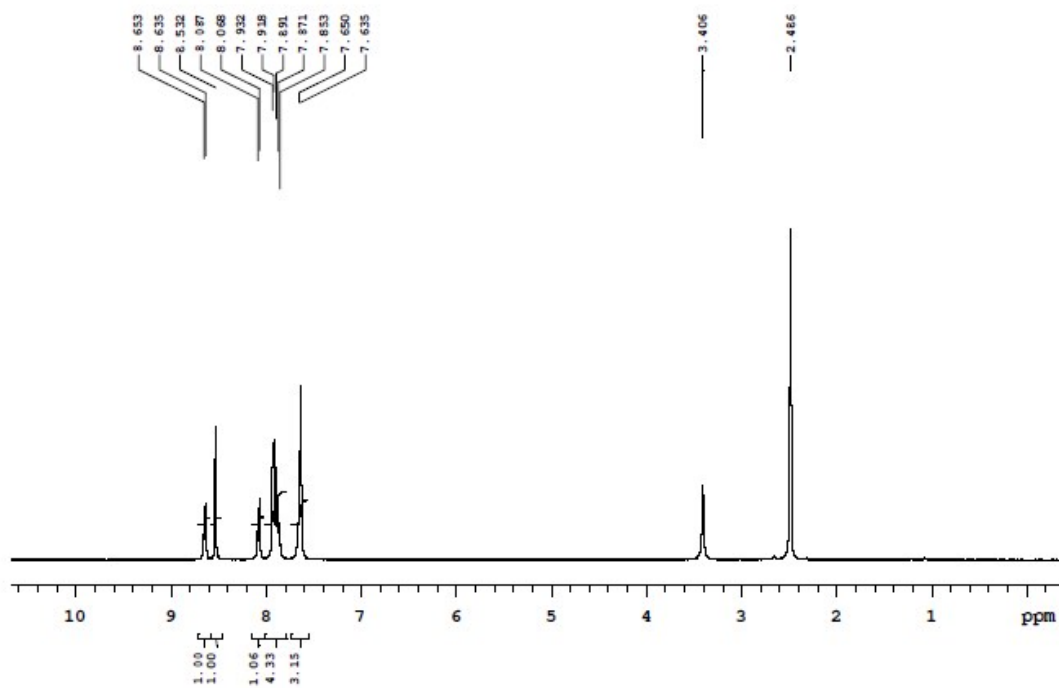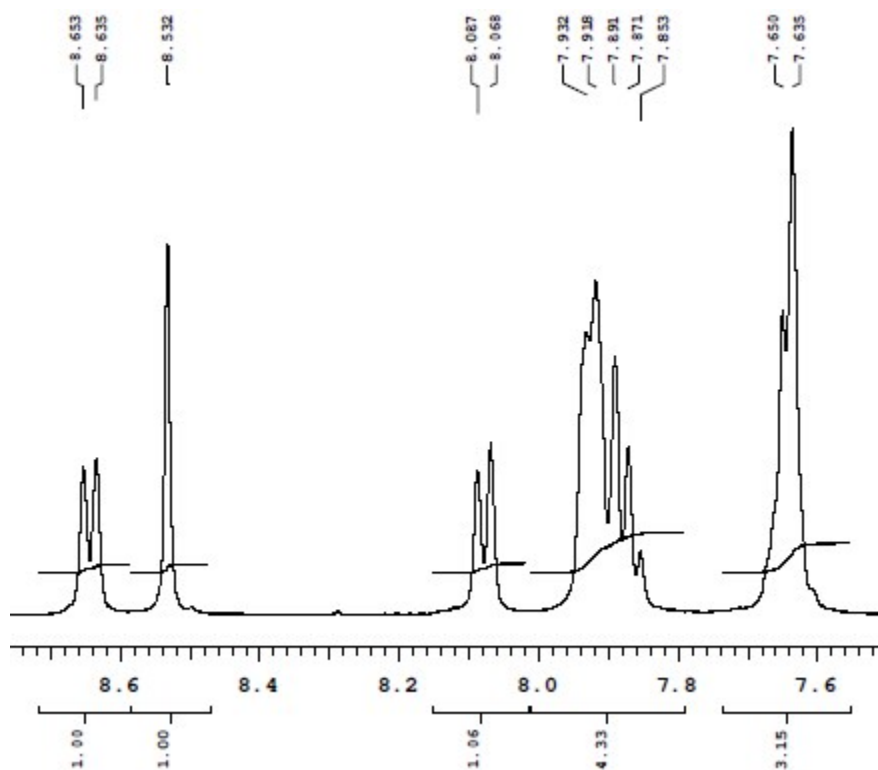

**Figure S47.**  $^1\text{H}$  NMR Spectra & its expansion for compound **5h** in  $\text{DMSO-}d_6$

NUCLEUS : C13  
 FRQ (MHz) : 100.50  
 AT (sec) : 1.28  
 SW (ppm) : 253.84  
 RD (sec) : 1.00  
 PW (usec) : 5.05  
 Scans : 3000  
 Solvent : dmsd  
 Data Points : 65536  
 LS (Hz) : 4.00  
 TEMP (K) : 303.15  
 EXP : s2p1  
 DATE : Feb 15 2016  
 System : VNMR5\_400

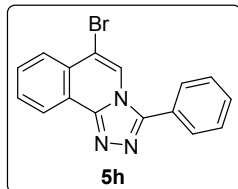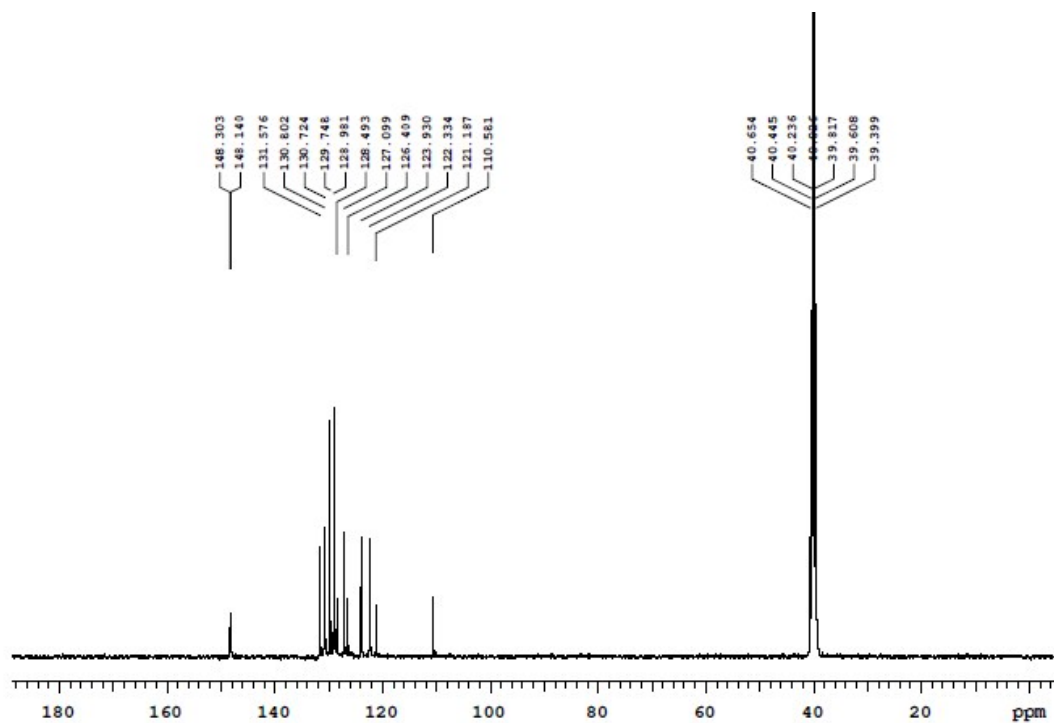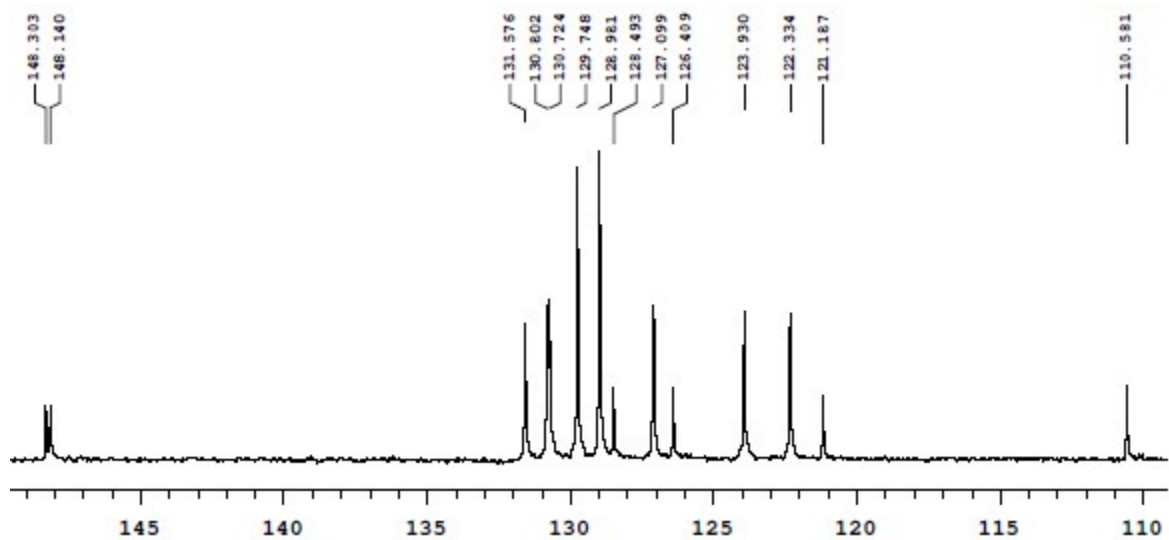

**Figure S48.**  $^{13}\text{C}$  NMR Spectra & its expansion for compound **5h** in  $\text{DMSO-}d_6$

NUCLEUS : H1  
FREQ (MHz) : 399.63  
AT (sec) : 2.27  
SW (ppm) : 18.08  
RD (sec) : 1.00  
DW (usec) : 6.60  
SCANS : 64  
Solvent : cdcl3  
Data Points : 32768  
LB (Hz) : 1.00  
TEMP (K) : 303.15  
EXP : s2pul  
DATE : Nov 16 2015  
System : VNMR5\_400

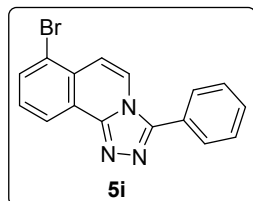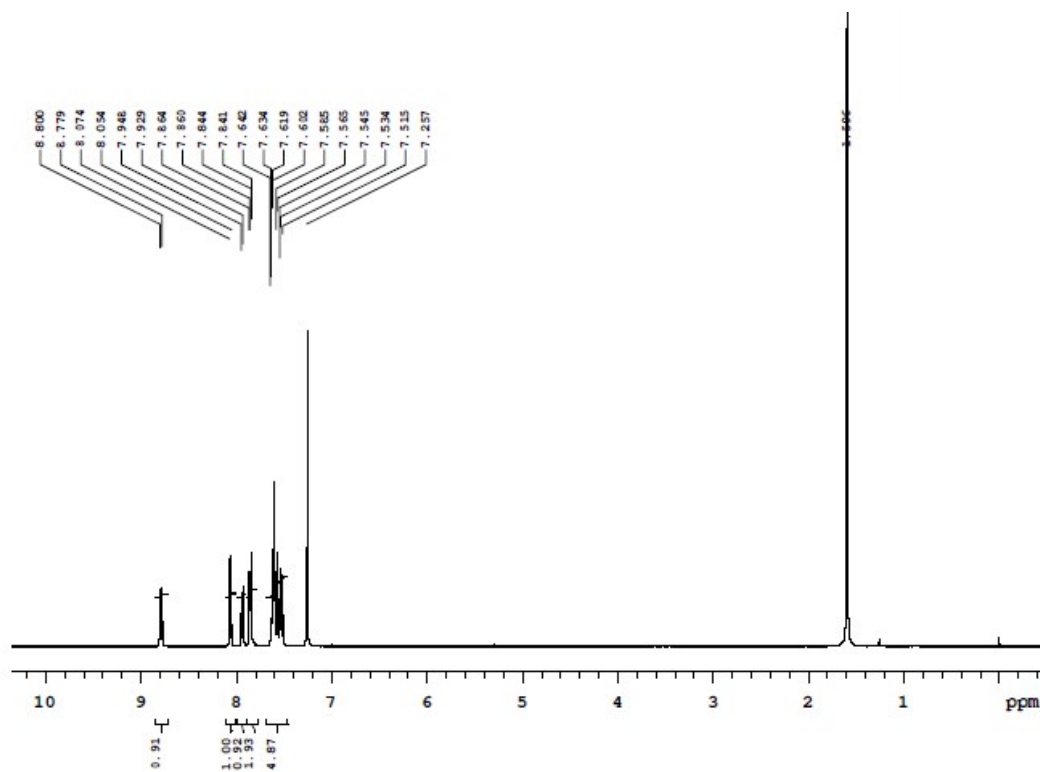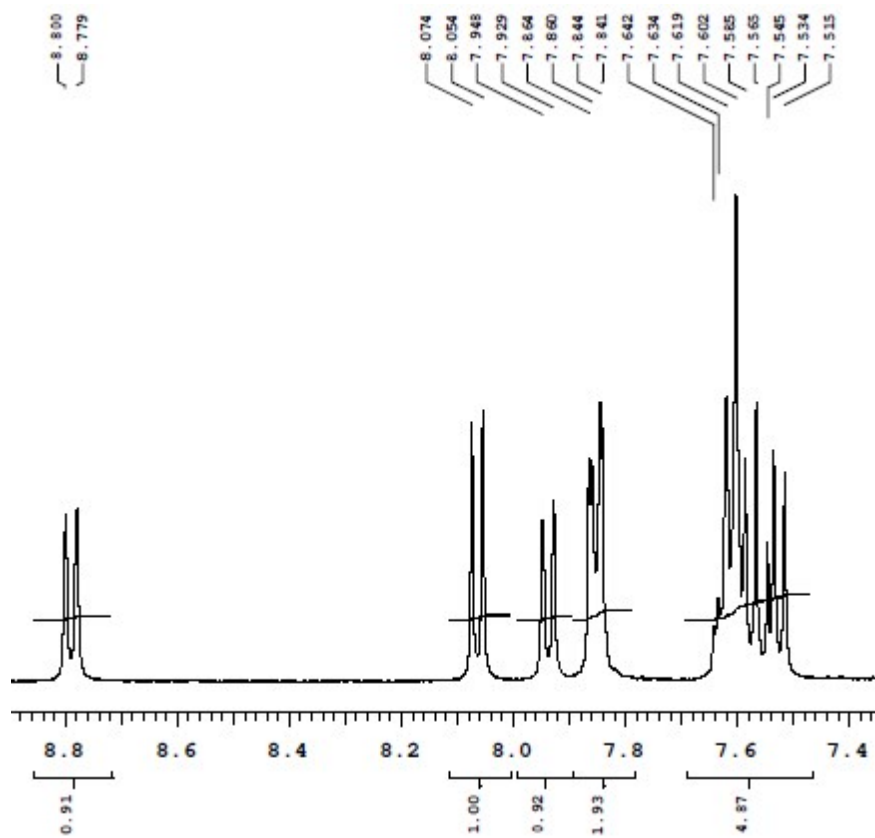

Figure S49.  $^1\text{H}$  NMR Spectra & its expansion for compound **5i** in  $\text{CDCl}_3$



NUCLEUS : C13  
 FREQ (MHz) : 100.50  
 AT (sec) : 1.28  
 SW (ppm) : 253.84  
 RD (sec) : 1.00  
 PW (usec) : 5.05  
 Scans : 1500  
 Solvent : cdcl3  
 Data Points : 65536  
 LB (Hz) : 4.00  
 TEMP (K) : 303.15  
 EXP : s2pul  
 DATE : Nov 24 2015  
 System : VNMR5\_400

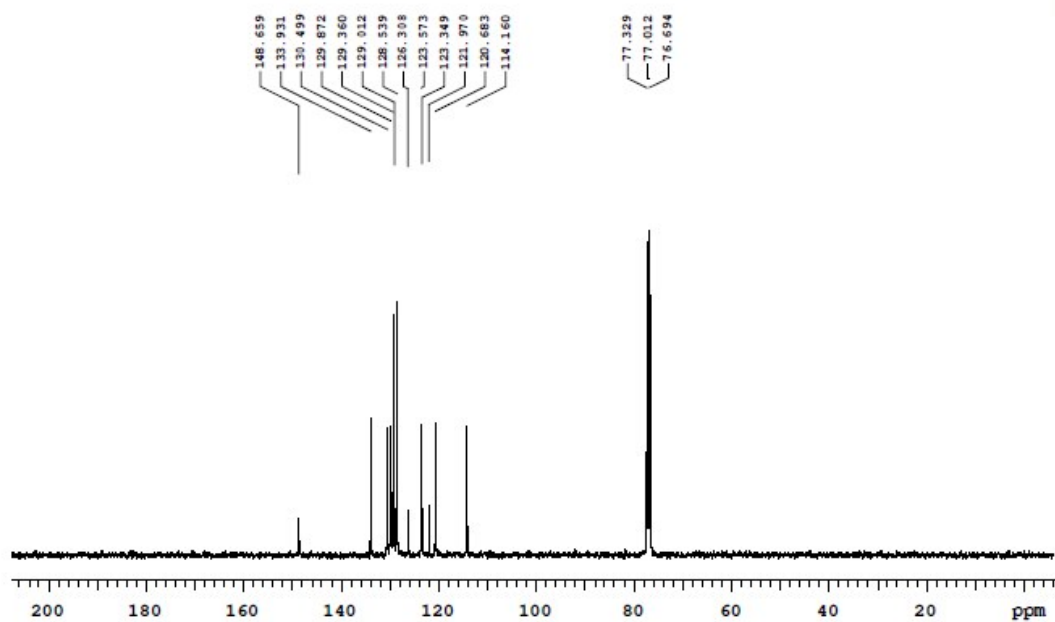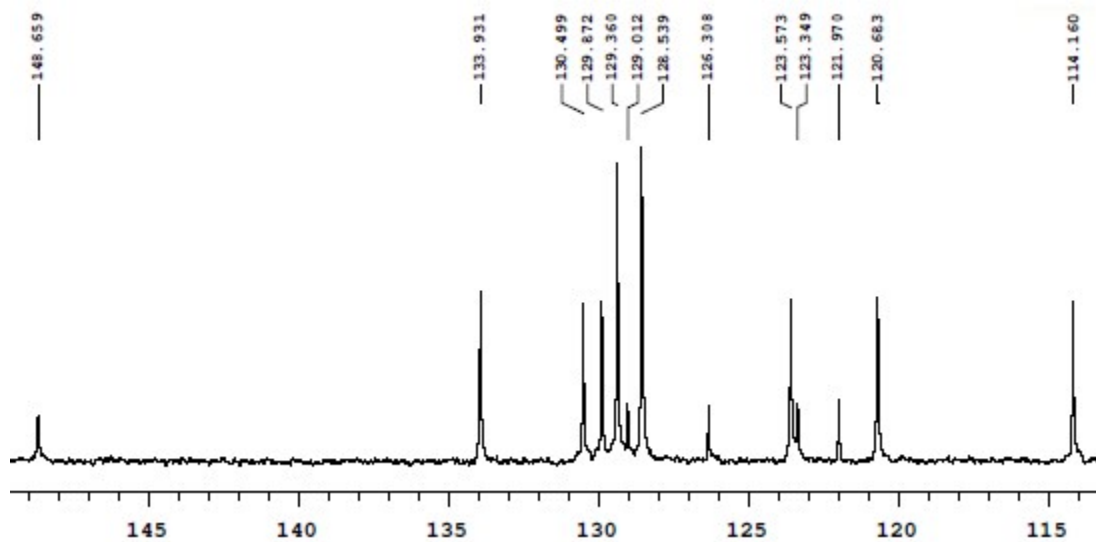

**Figure S50.**  $^{13}\text{C}$  NMR Spectra & its expansion for compound **5i** in  $\text{CDCl}_3$

NUCLEUS : H1  
 FREQ (MHz) : 399.63  
 AT (sec) : 2.27  
 SW (ppm) : 18.08  
 RD (sec) : 1.00  
 PW (usec) : 6.60  
 Scans : 64  
 Solvent : cdcl3  
 Data Points : 32768  
 LB (Hz) : 1.00  
 TEMP (K) : 303.15  
 EXP : s2p1  
 DATE : Nov 16 2015  
 System : VNMRS\_400

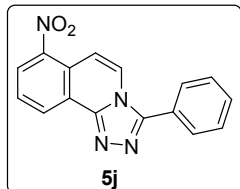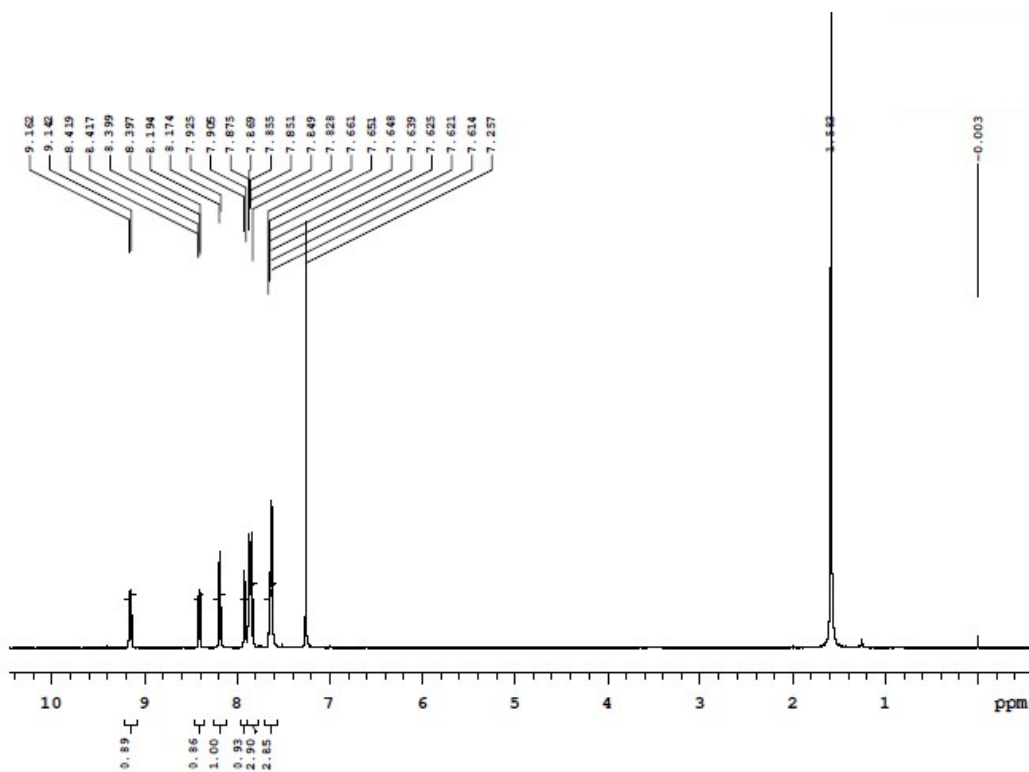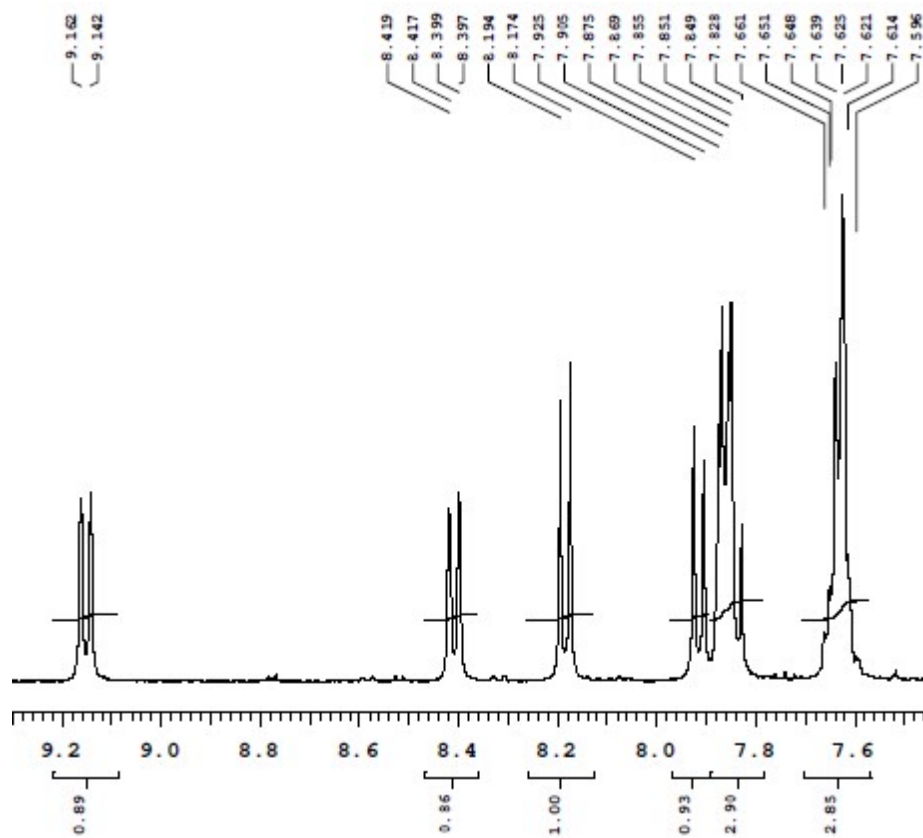

**Figure S51.**  $^1\text{H}$  NMR Spectra & its expansion for compound **5j** in  $\text{CDCl}_3$

NUCLEUS : C13  
 FREQ (MHz) : 100.50  
 AT (sec) : 1.28  
 SW (ppm) : 253.84  
 RD (sec) : 1.00  
 FW (usec) : 5.05  
 Scans : 1500  
 Solvent : cdcl3  
 Data Points : 65536  
 LB (Hz) : 3.00  
 TEMP (K) : 303.15  
 EXP : s2pul  
 DATE : Nov 24 2015  
 System : VNMR5\_400

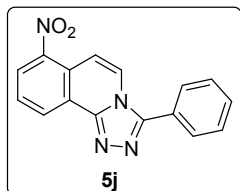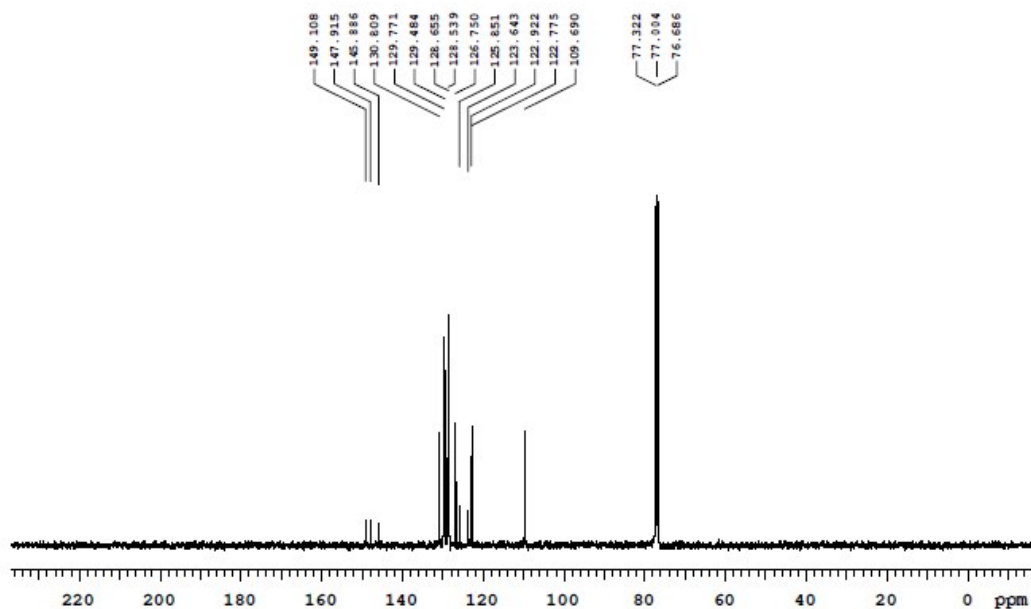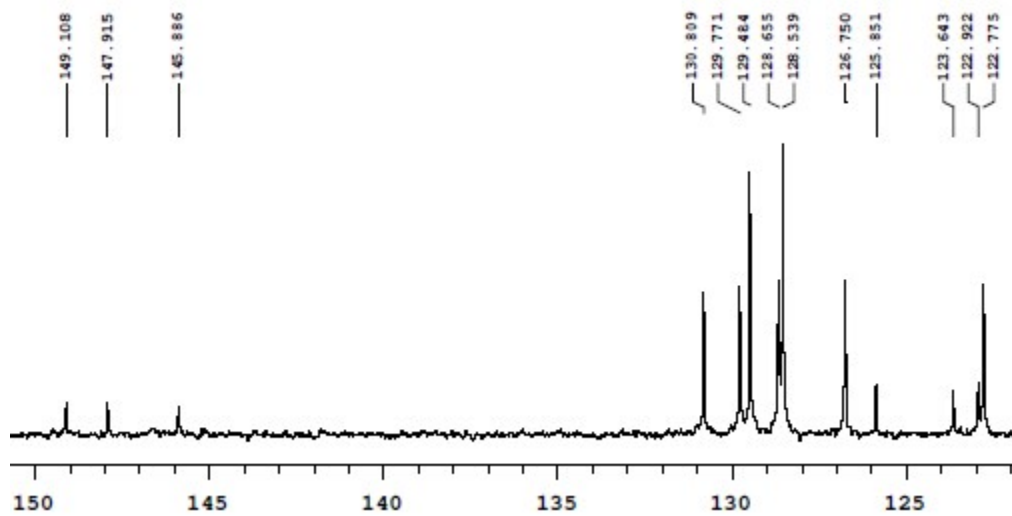

**Figure S52.**  $^{13}\text{C}$  NMR Spectra & its expansion for compound **5j** in  $\text{CDCl}_3$
