# Supplementary material for: I2-TBHP-catalyzed one-pot highly efficient synthesis of 4,3-fused 1,2,4-triazoles from N-tosylhydrazones and aromatic N-heterocycles via intermolecular formal 1,3-dipolar cycloaddition
Source: Royal Society of Chemistry journal article supplement (doi:10.1039/c6ob01926a), 2016-01-01
Supplement: c6ob01926a3.pdf [file c6ob01926a3.pdf]

## Electronic supplementary information for

### **I<sub>2</sub>–TBHP-catalyzed one-pot highly efficient synthesis of 4,3-fused 1,2,4-triazoles from *N*-tosylhydrazones and aromatic *N*-heterocycles via intermolecular formal 1,3-dipolar cycloaddition**

Surendra Babu Inturi,<sup>a,b</sup> Biswajit Kalita<sup>\*a</sup> and A. Jafar Ahamed<sup>\*b</sup>

<sup>a</sup>*Medicinal Chemistry Division, Jubilant Biosys Ltd, #96, Industrial Suburb, 2nd Stage, Yeshwanthpur, Bangalore 560022, Karnataka, India.*

<sup>b</sup>*Post Graduate and Research Department of Chemistry, Jamal Mohamed College (Autonomous), affiliated to Bharathidasan University, Tiruchirappalli - 620020, Tamil Nadu, India.*

*\*Corresponding authors. Tel.: +91-80-6662-8645.  
E-mail address: biswajit\_kalita@jubilantbiosys.com  
E-mail address: agjafar@yahoo.co.in*

#### **Table of contents**

|                                                                                                       |        |
|-------------------------------------------------------------------------------------------------------|--------|
| The <sup>1</sup> H and <sup>13</sup> C NMR spectra of compounds <b>6a-x</b> , <b>1l-m</b> & <b>1s</b> | S2-S55 |
|-------------------------------------------------------------------------------------------------------|--------|

**$^1\text{H}$  and  $^{13}\text{C}$  NMR Spectra of compounds 6a-x, 1l-m & 1s:**

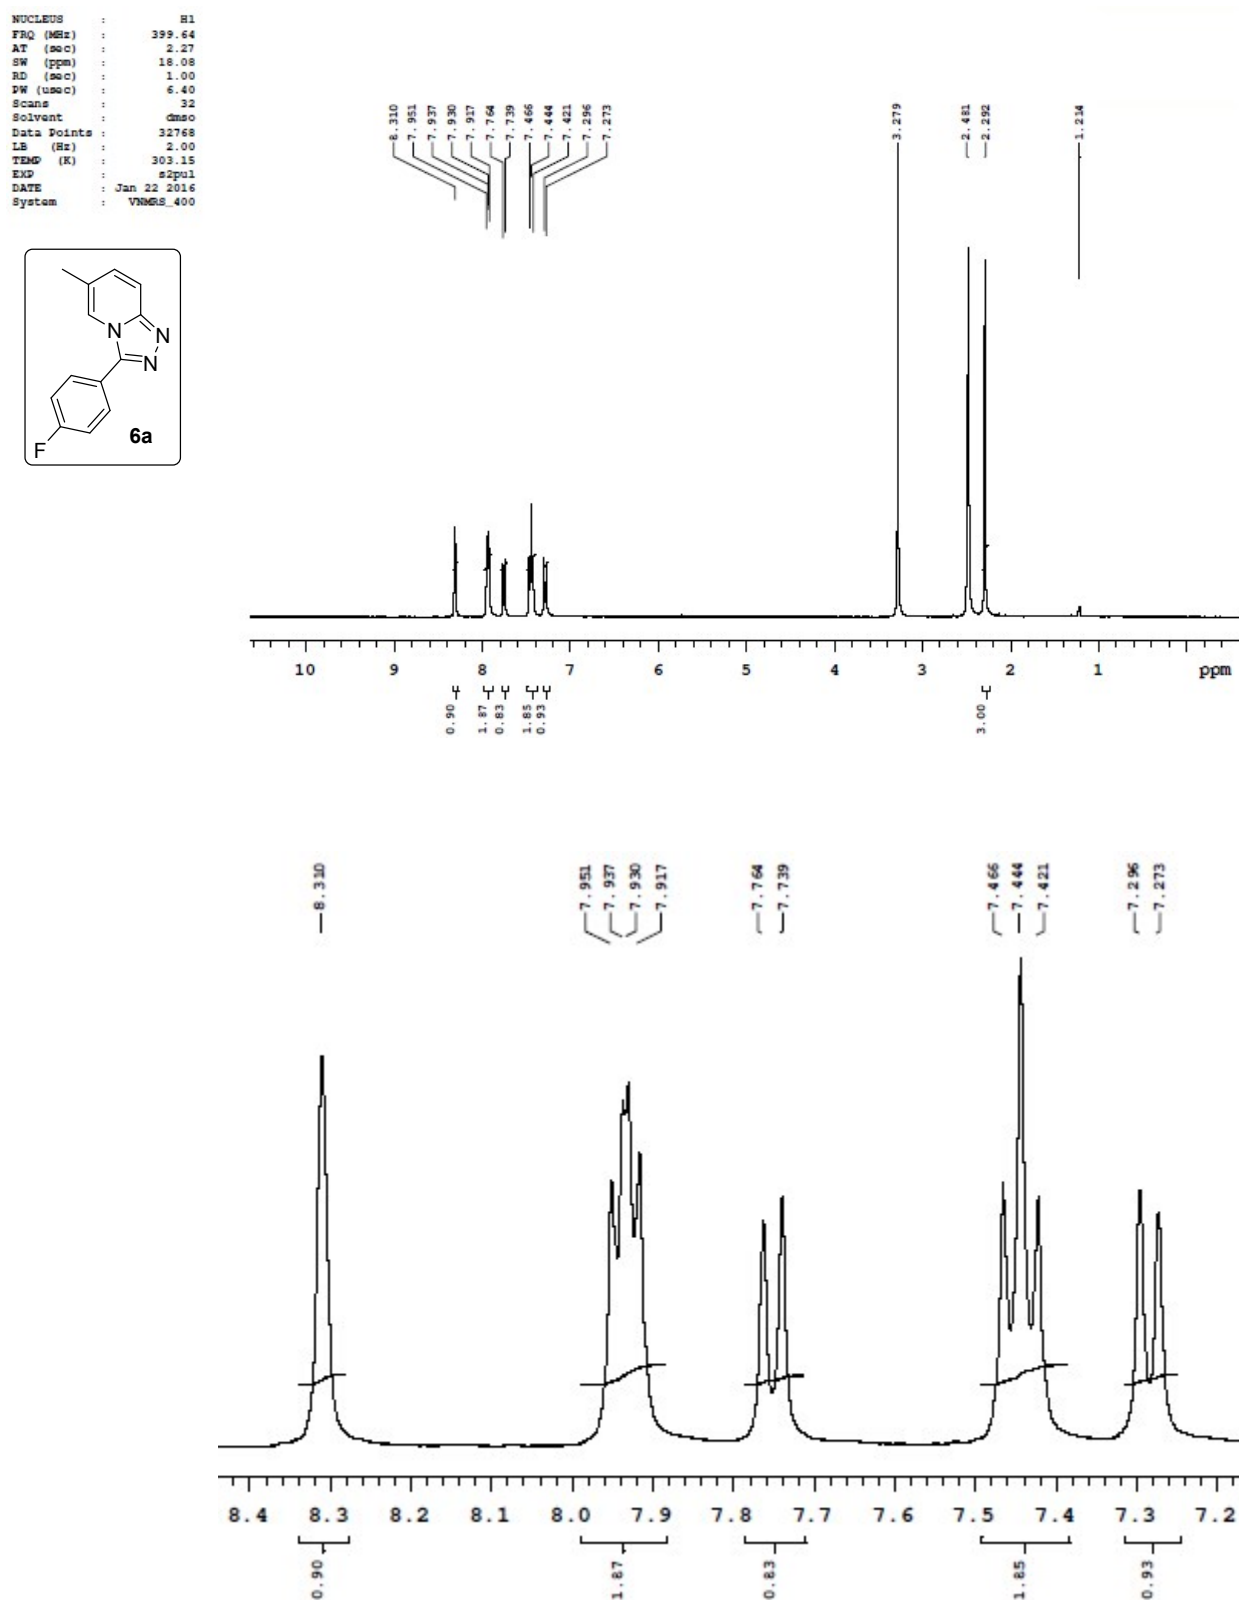

**Figure S53.**  $^1\text{H}$  NMR Spectra & its expansion for compound **6a** in  $\text{DMSO-}d_6$

NUCLEUS : C13  
 FRQ (MHz) : 100.50  
 AT (sec) : 1.28  
 SW (ppm) : 253.84  
 RD (sec) : 1.00  
 PW (usec) : 5.05  
 Scans : 6400  
 Solvent : DMSO  
 Data Points : 65536  
 LB (Hz) : 4.00  
 TEMP (K) : 303.15  
 EXP : s2pul  
 DATE : Jan 23 2016  
 System : VNMR5\_400

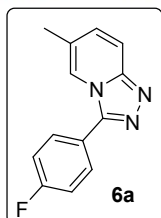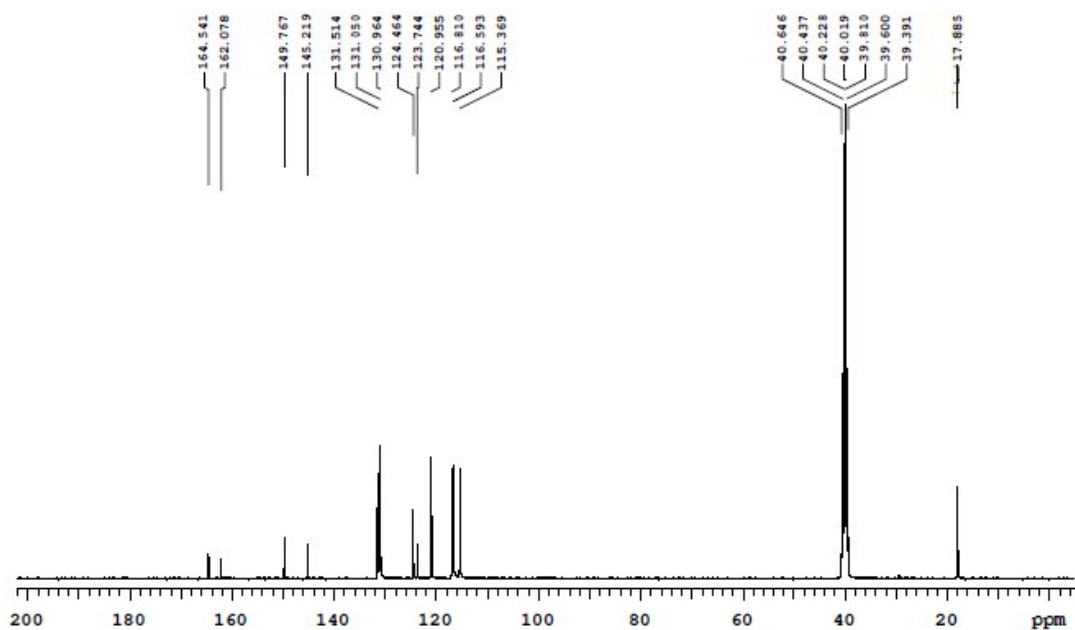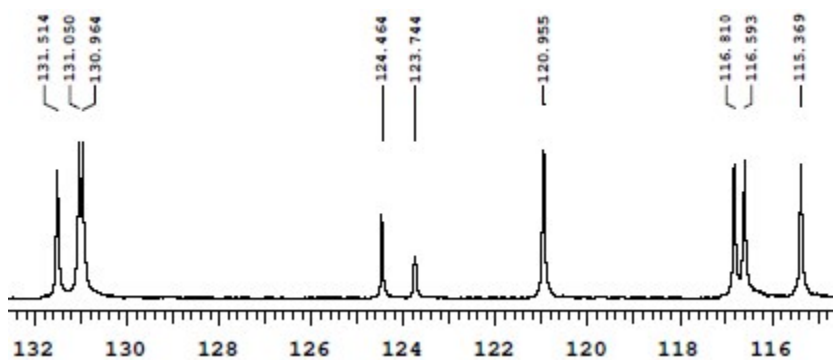

**Figure S54.**  $^{13}\text{C}$  NMR Spectra & its expansion for compound **6a** in  $\text{DMSO-}d_6$

NUCLEUS : H1  
 FREQ (MHz) : 399.64  
 AT (sec) : 2.27  
 SW (ppm) : 18.08  
 RD (sec) : 1.00  
 DW (usec) : 6.60  
 Scans : 64  
 Solvent : dmsd  
 Data Points : 32768  
 LB (Hz) : 1.00  
 TEMP (K) : 303.15  
 EXP : s2pul  
 DATE : Jan 21 2016  
 System : VNMRS\_400

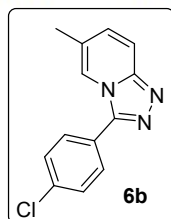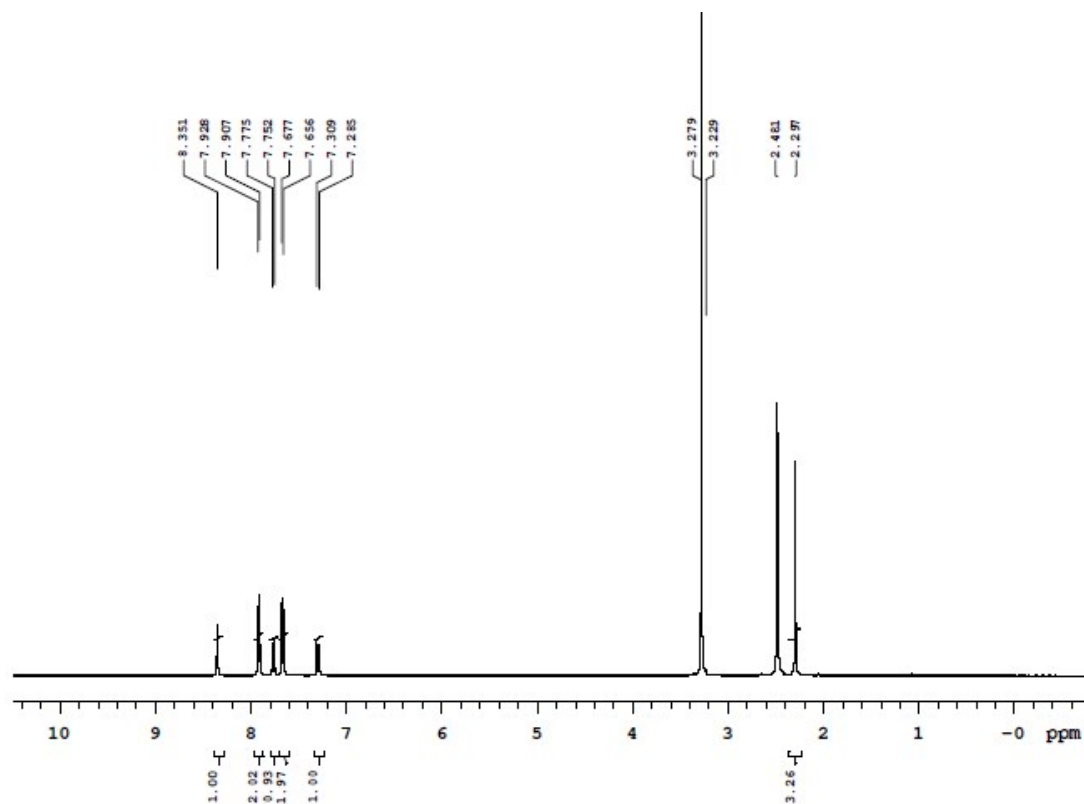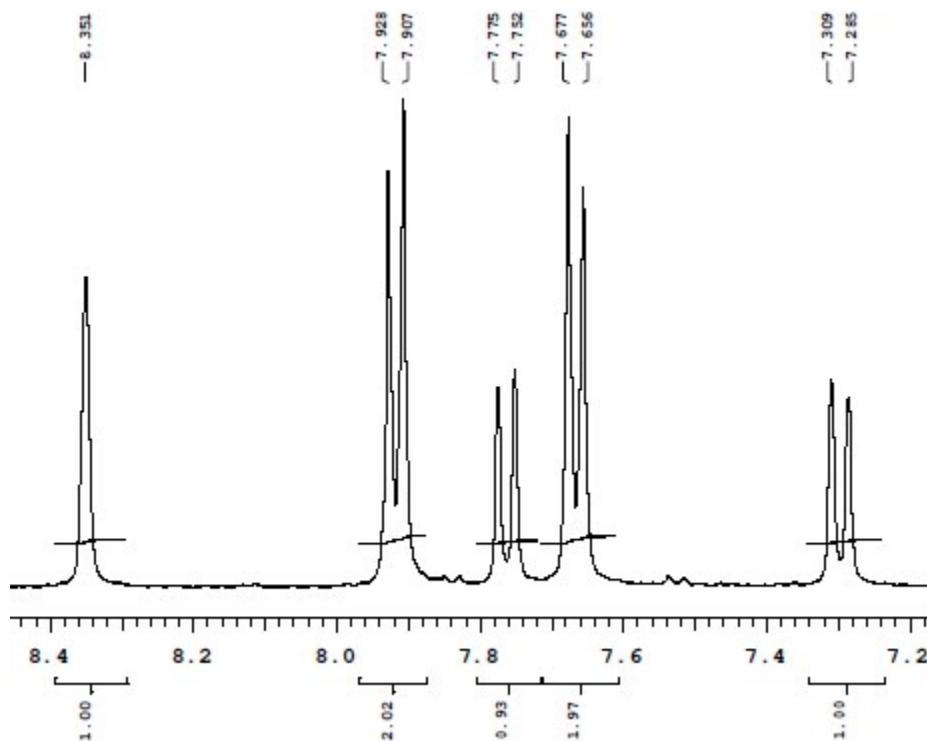

**Figure S55.**  $^1\text{H}$  NMR Spectra & its expansion for compound **6b** in  $\text{DMSO-}d_6$

NUCLEUS : C13  
 FRQ (MHz) : 100.50  
 AT (sec) : 1.28  
 SW (ppm) : 253.84  
 RD (sec) : 1.00  
 PW (usec) : 5.05  
 Scans : 6400  
 Solvent : dmsc  
 Data Points : 65536  
 LB (Hz) : 4.00  
 TEMP (K) : 303.15  
 EXP : s2pul  
 DATE : Jan 21 2016  
 System : VNMR5\_400

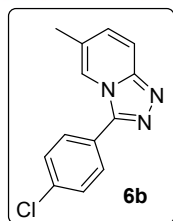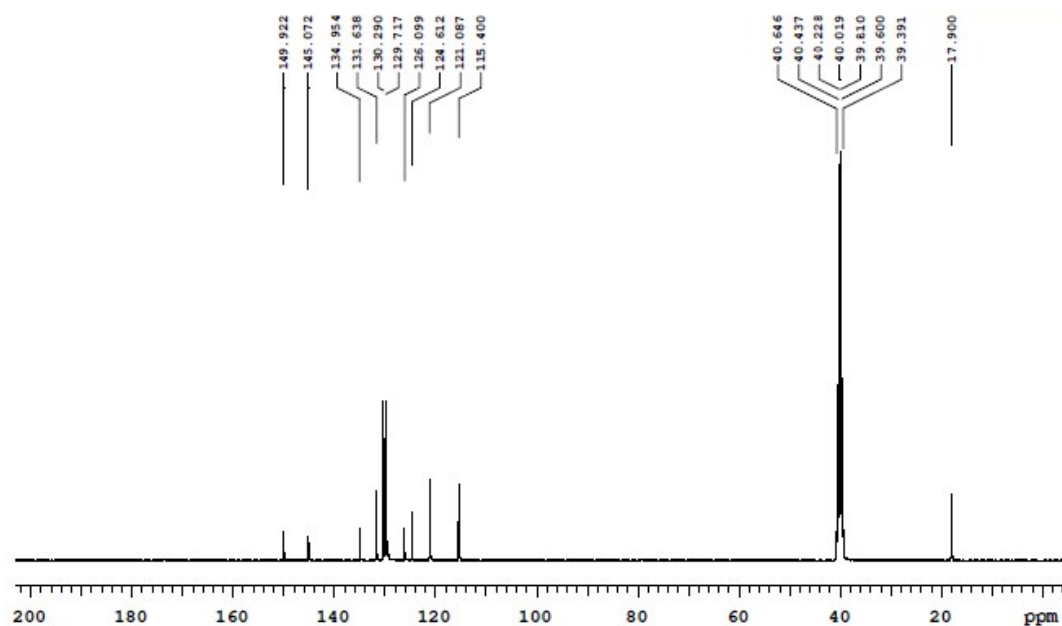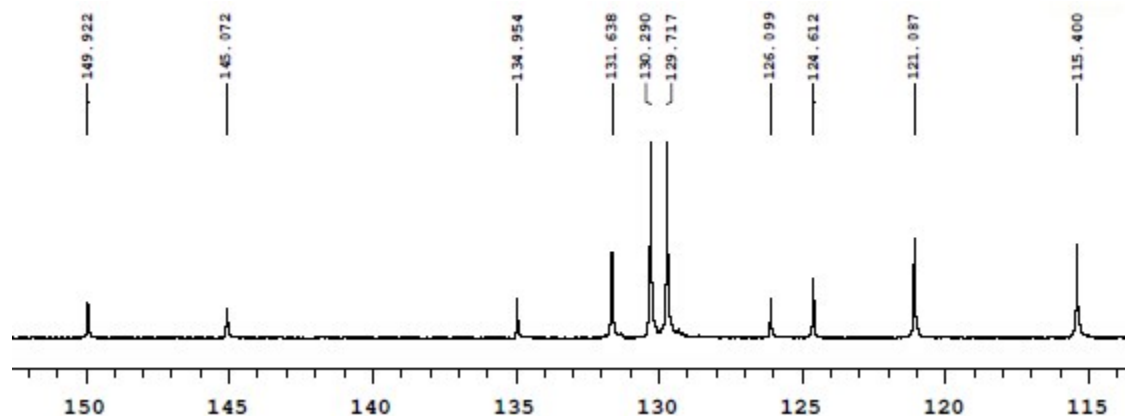

**Figure S56.**  $^{13}\text{C}$  NMR Spectra & its expansion for compound **6b** in  $\text{DMSO-}d_6$

NUCLEUS : H1  
 FRQ (MHz) : 399.64  
 AT (sec) : 2.27  
 SW (ppm) : 18.08  
 RD (sec) : 1.00  
 DW (usec) : 6.60  
 Scans : 64  
 Solvent : dmsc  
 Data Points : 32768  
 LB (Hz) : 1.00  
 TEMP (K) : 303.15  
 EXP : s2pul  
 DATE : Jan 22 2016  
 System : VNM60S-400

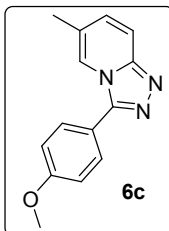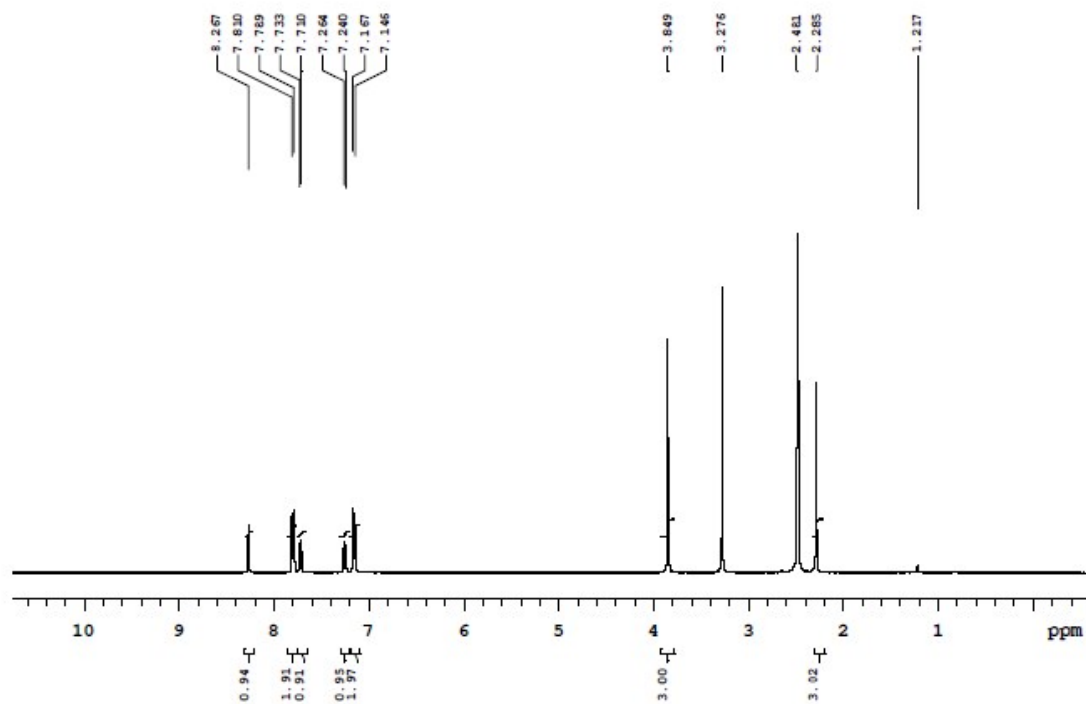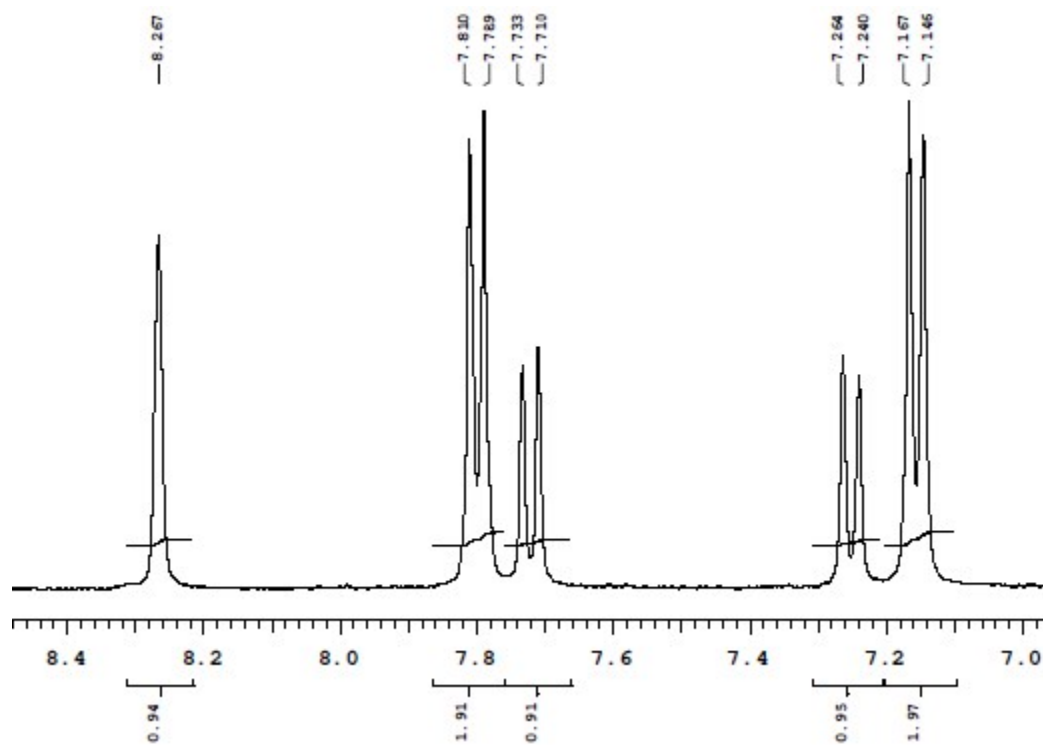

**Figure S57.**  $^1\text{H}$  NMR Spectra & its expansion for compound **6c** in  $\text{DMSO}-d_6$

NUCLEUS : C13  
 FRQ (MHz) : 100.50  
 AT (sec) : 1.28  
 SW (ppm) : 253.84  
 RD (sec) : 1.00  
 PW (usec) : 5.05  
 Scans : 6400  
 Solvent : dmsc  
 Data Points : 65536  
 LB (Hz) : 4.00  
 TEMP (K) : 303.15  
 EXP : s2pul  
 DATE : Jan 23 2016  
 System : VNMR5\_400

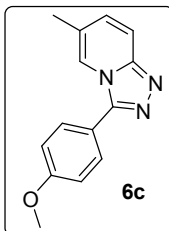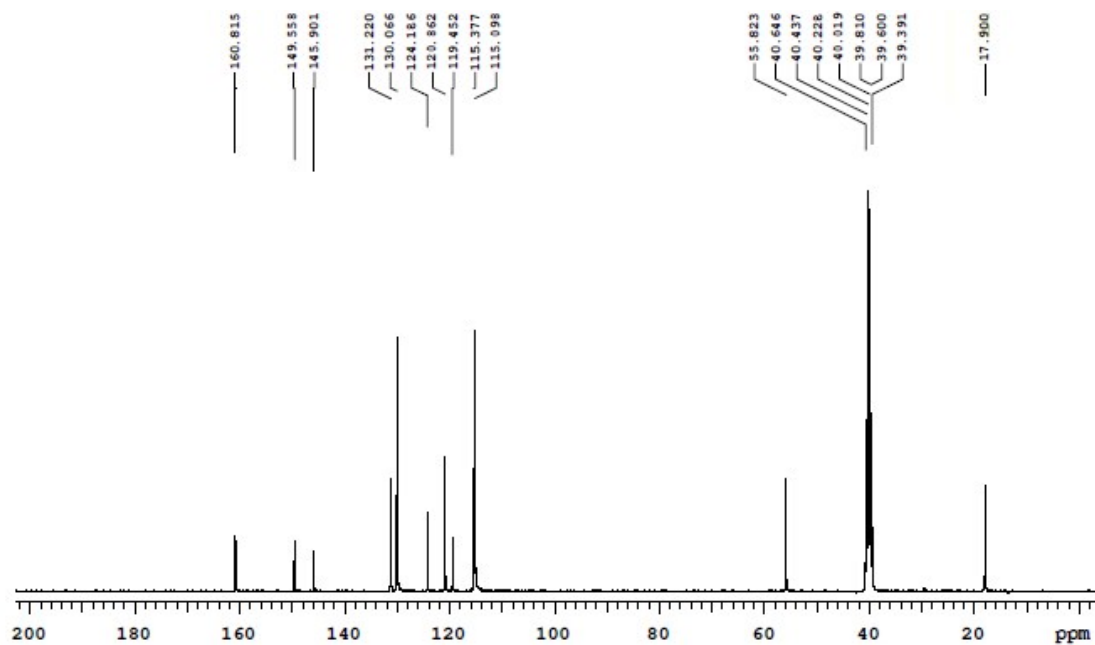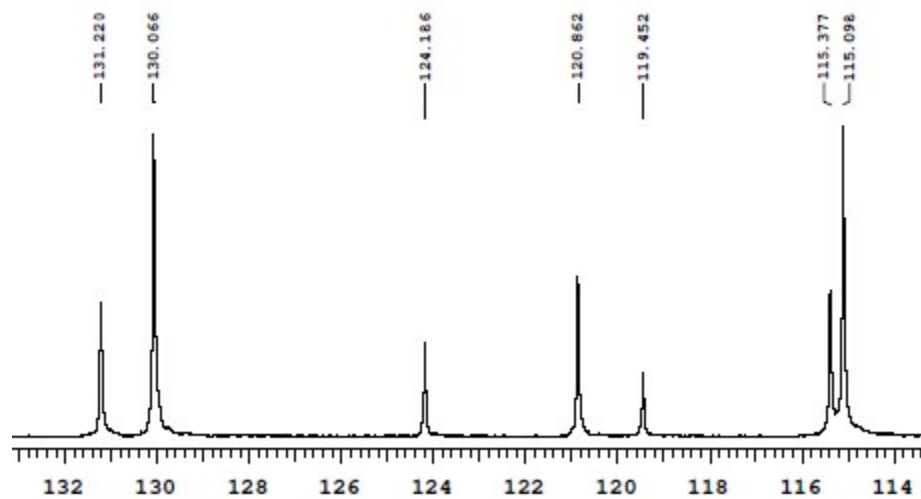

**Figure S58.**  $^{13}\text{C}$  NMR Spectra & its expansion for compound **6c** in  $\text{DMSO-}d_6$

NUCLEUS : H1  
 FREQ (MHz) : 399.64  
 AT (sec) : 2.27  
 SW (ppm) : 18.08  
 RD (sec) : 1.00  
 FID (usec) : 6.60  
 Scans : 64  
 Solvent : dmsc  
 Data Points : 32768  
 LB (Hz) : 1.00  
 TEMP (K) : 303.15  
 EXP : s2pul  
 DATE : Jan 20 2016  
 System : VNMR5\_400

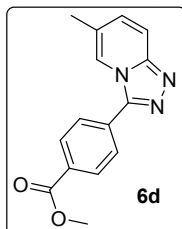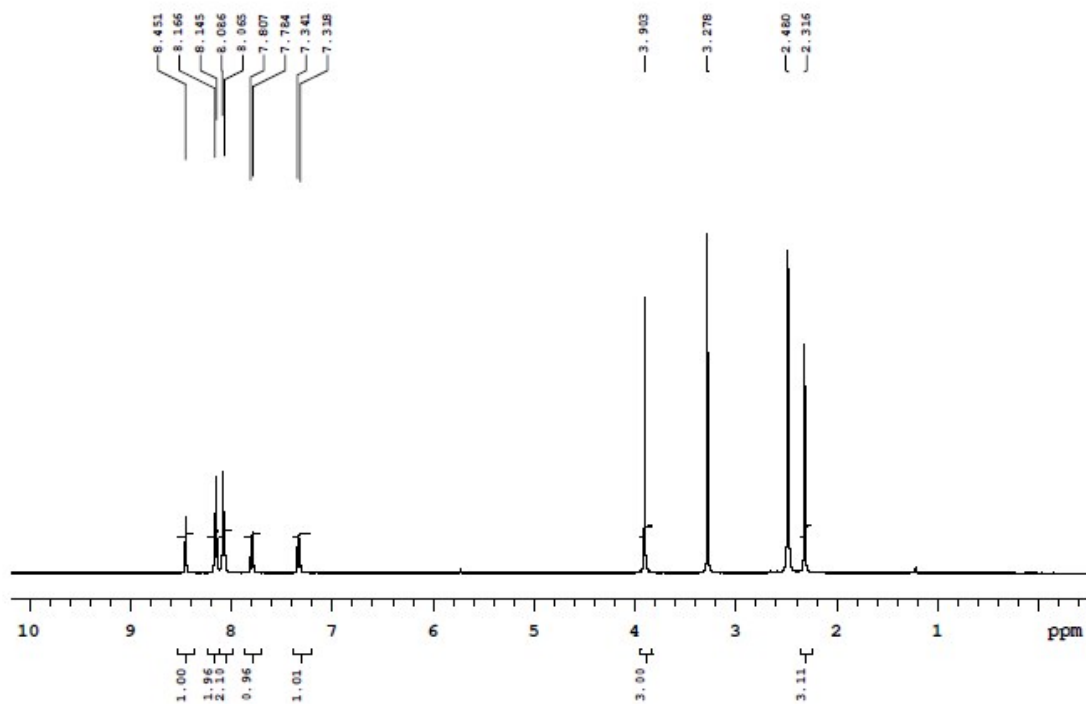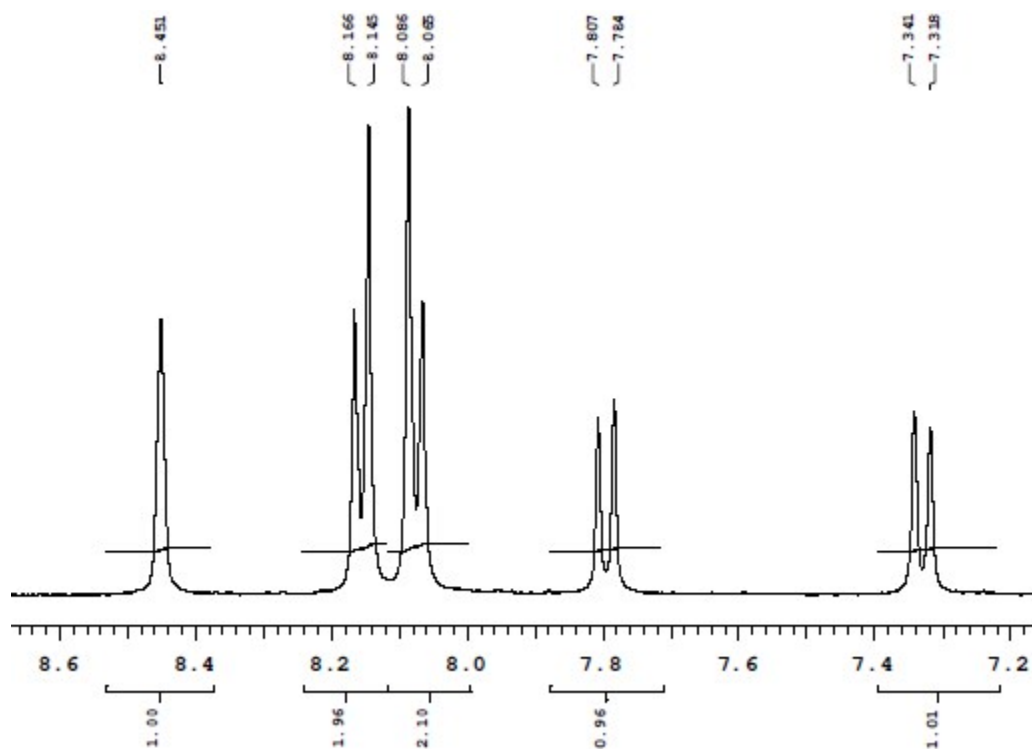

**Figure S59.**  $^1\text{H}$  NMR Spectra & its expansion for compound **6d** in  $\text{DMSO}-d_6$

NUCLEUS : C13  
 FRQ (MHz) : 100.50  
 AT (sec) : 1.28  
 SW (ppm) : 253.84  
 RD (sec) : 1.00  
 DW (usec) : 5.05  
 Scans : 6400  
 Solvent : dmsc  
 Data Points : 65536  
 LB (Hz) : 4.00  
 TEMP (K) : 303.15  
 EXP : s2pul  
 DATE : Jan 21 2016  
 System : VNMR5\_400

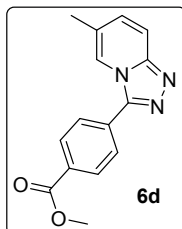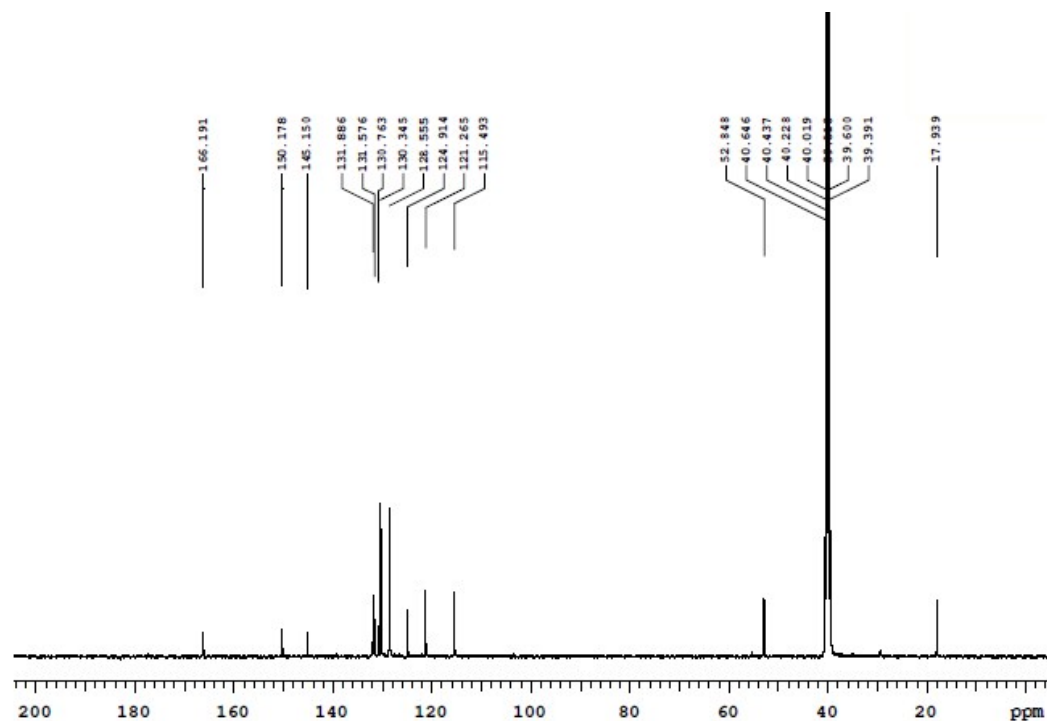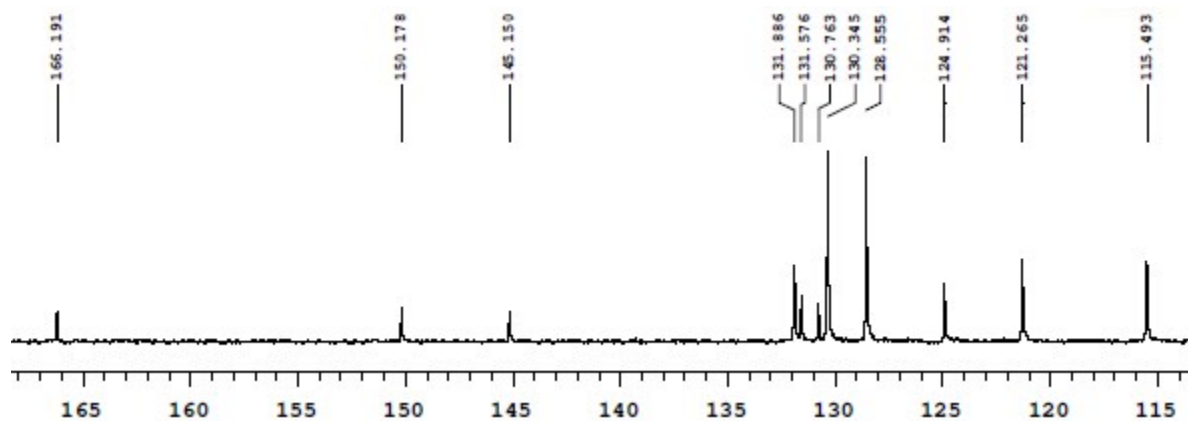

**Figure S60.**  $^{13}\text{C}$  NMR Spectra & its expansion for compound **6d** in  $\text{DMSO-}d_6$

NUCLEUS : H1  
 FREQ (MHz) : 399.64  
 AT (sec) : 2.27  
 SW (ppm) : 18.08  
 RD (sec) : 1.00  
 DW (usec) : 6.60  
 Scans : 64  
 Solvent : dmsc  
 Data Points : 32768  
 LB (Hz) : 1.00  
 TEMP (K) : 303.15  
 EXP : s2pul  
 DATE : Feb 10 2016  
 System : VNMRS\_400

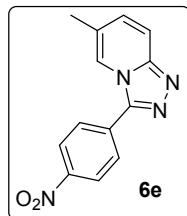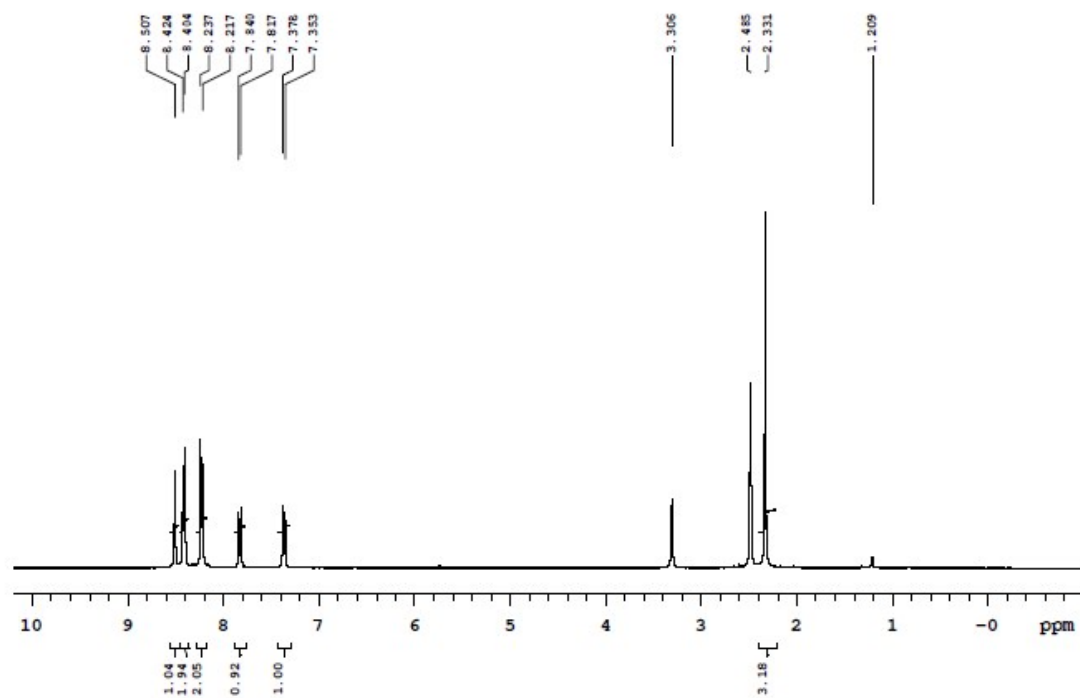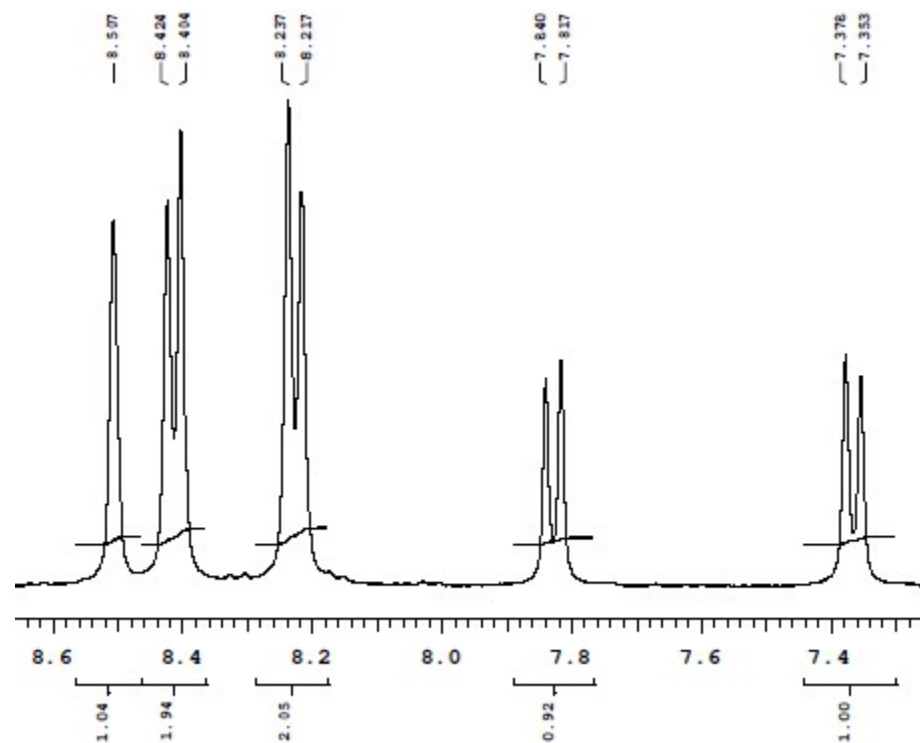

**Figure S61.**  $^1\text{H}$  NMR Spectra & its expansion for compound **6e** in  $\text{DMSO-}d_6$

NUCLEUS : C13  
 FRQ (MHz) : 100.50  
 AT (sec) : 1.28  
 SW (ppm) : 253.84  
 RD (sec) : 1.00  
 PW (usec) : 5.05  
 Scans : 1000  
 Solvent : dmsc  
 Data Points : 65536  
 LB (Hz) : 4.00  
 TEMP (K) : 303.15  
 EXP : s2pul  
 DATE : Feb 12 2016  
 System : VNMR5\_400

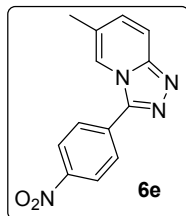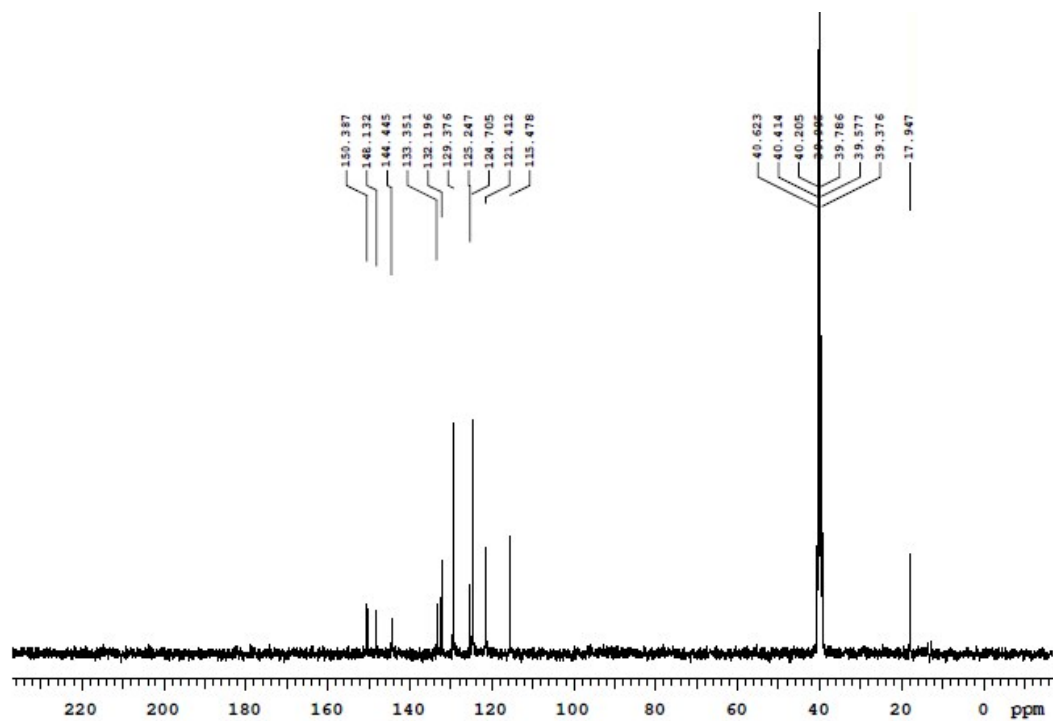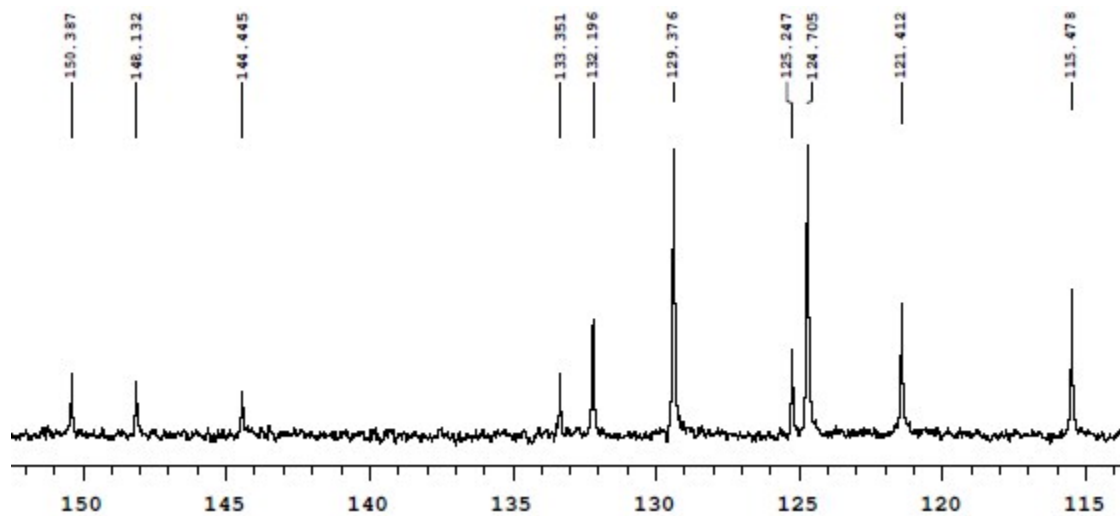

**Figure S62.**  $^{13}\text{C}$  NMR Spectra & its expansion for compound **6e** in  $\text{DMSO-}d_6$

NUCLEUS : H1  
 FRQ (MHz) : 399.64  
 AT (sec) : 2.27  
 SW (ppm) : 18.08  
 RD (sec) : 1.00  
 FWH (usec) : 6.60  
 Scans : 64  
 Solvent : dmsd  
 Data Points : 32768  
 LB (Hz) : 2.00  
 TEMP (K) : 303.15  
 EXP : s2pul  
 DATE : Feb 9 2016  
 System : VNMRB\_400

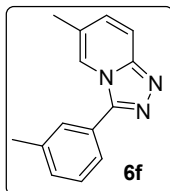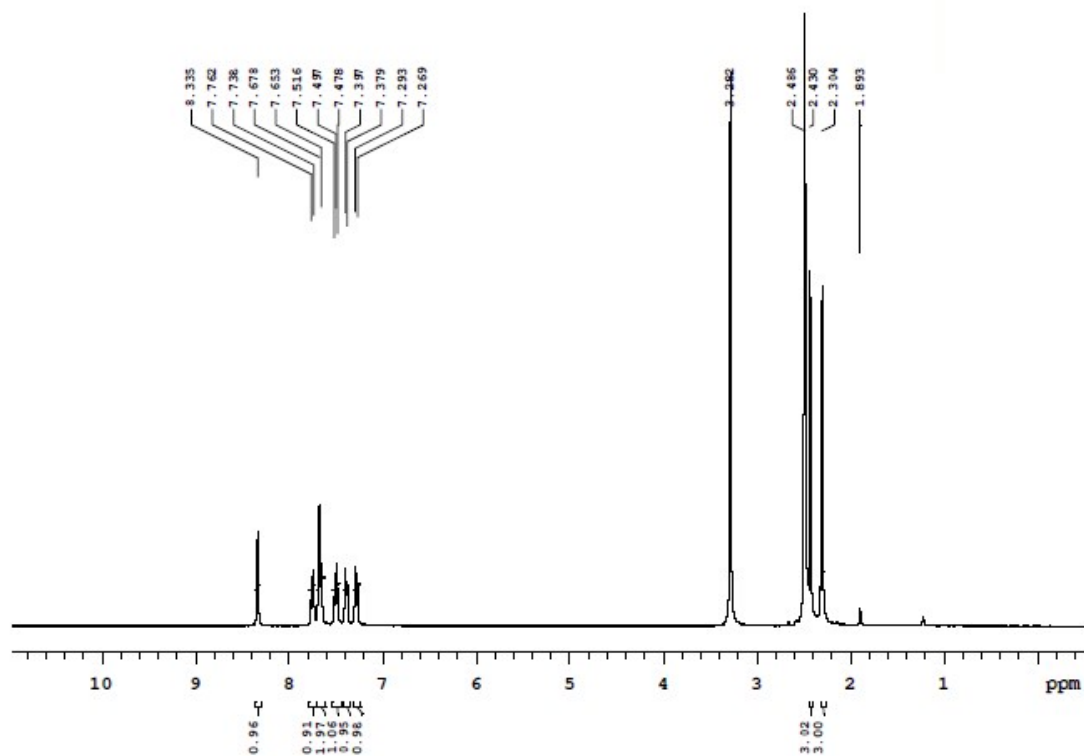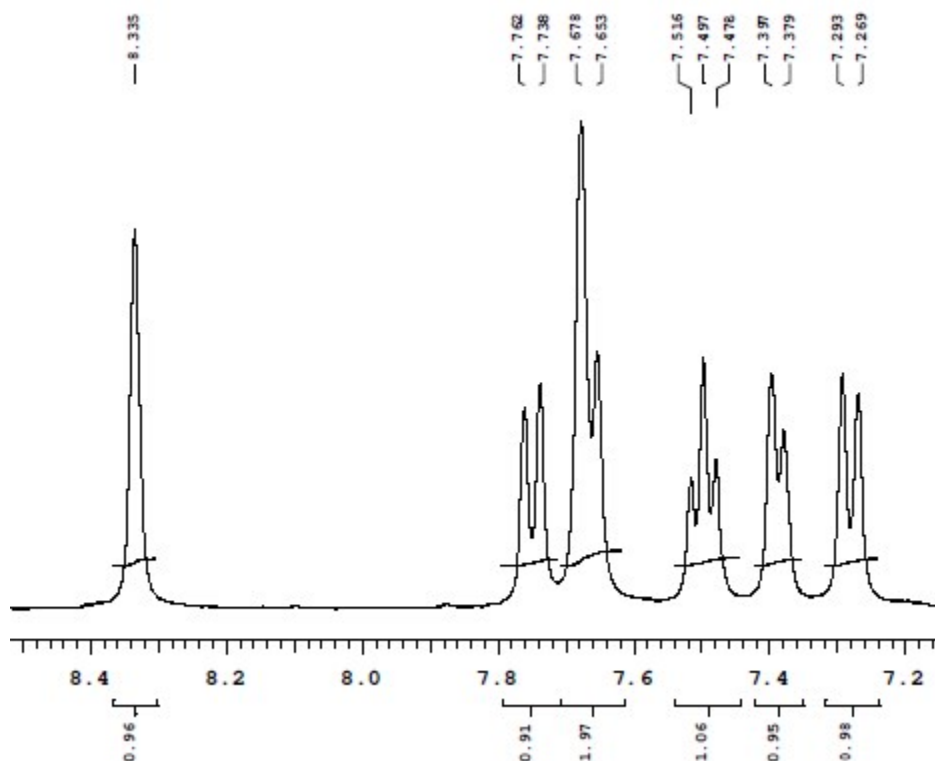

**Figure S63.**  $^1\text{H}$  NMR Spectra & its expansion for compound **6f** in  $\text{DMSO-}d_6$

NUCLEUS : C13  
 FREQ (MHz) : 100.50  
 AT (sec) : 1.28  
 SW (ppm) : 253.84  
 RD (sec) : 1.00  
 PW (usec) : 5.05  
 Scans : 1000  
 Solvent : dmsc  
 Data Points : 65536  
 LB (Hz) : 5.00  
 TEMP (K) : 303.15  
 EXP : s2pul  
 DATE : Feb 10 2016  
 System : VNMRS\_400

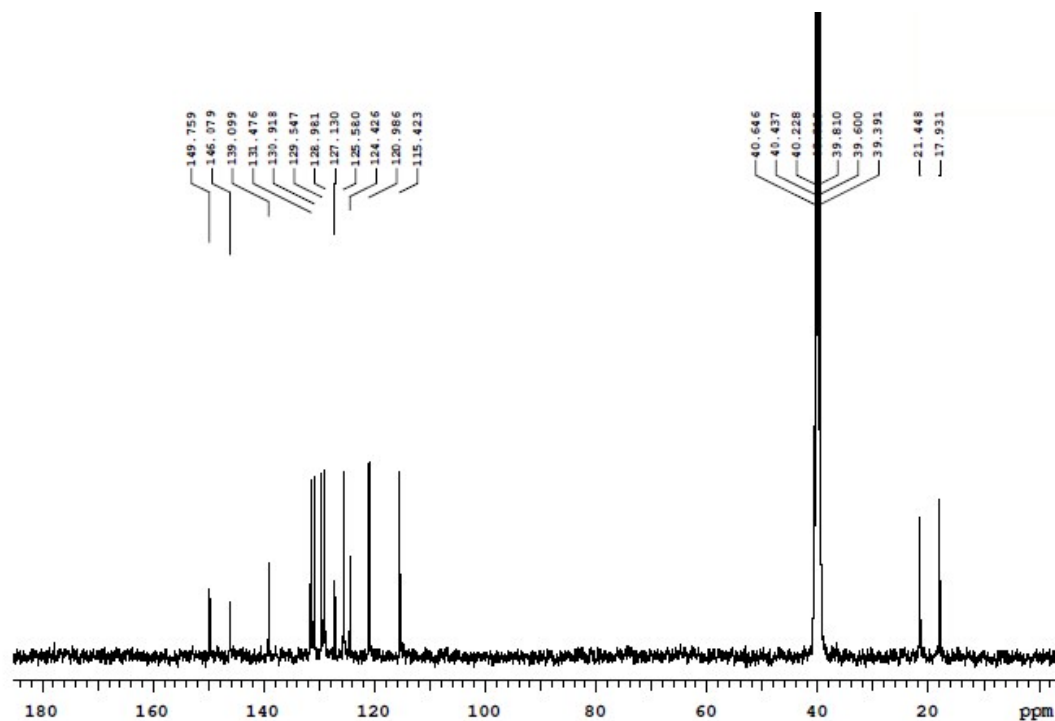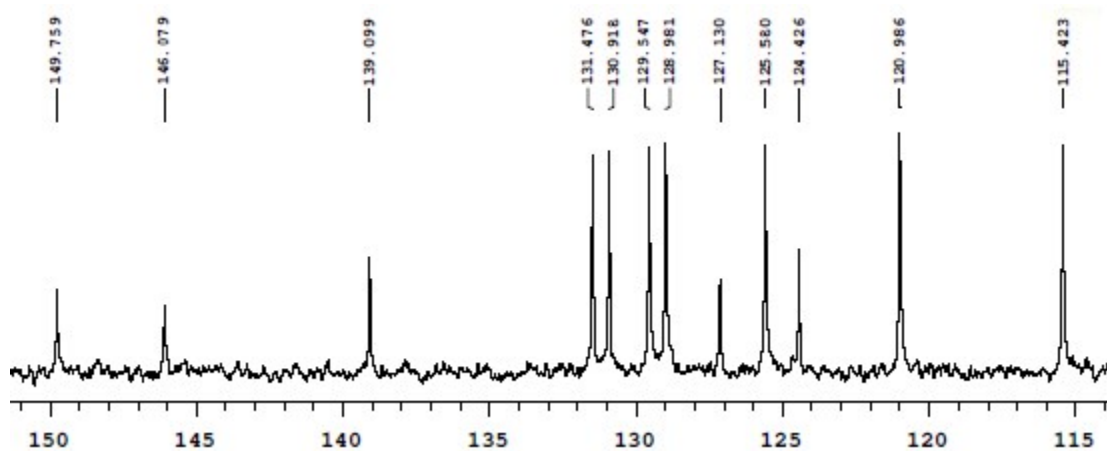

**Figure S64.**  $^{13}\text{C}$  NMR Spectra & its expansion for compound **6f** in  $\text{DMSO-}d_6$

NUCLEUS : H1  
 FRQ (MHz) : 399.64  
 AT (sec) : 2.27  
 SW (ppm) : 18.08  
 RD (sec) : 1.00  
 PW (usec) : 6.60  
 Scans : 64  
 Solvent : dms0  
 Data Points : 32768  
 LB (Hz) : 1.00  
 TEMP (K) : 303.15  
 EXP : s2pul  
 DATE : Feb 11 2016  
 System : VNMRs\_400

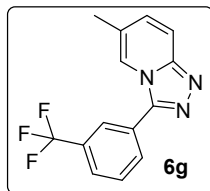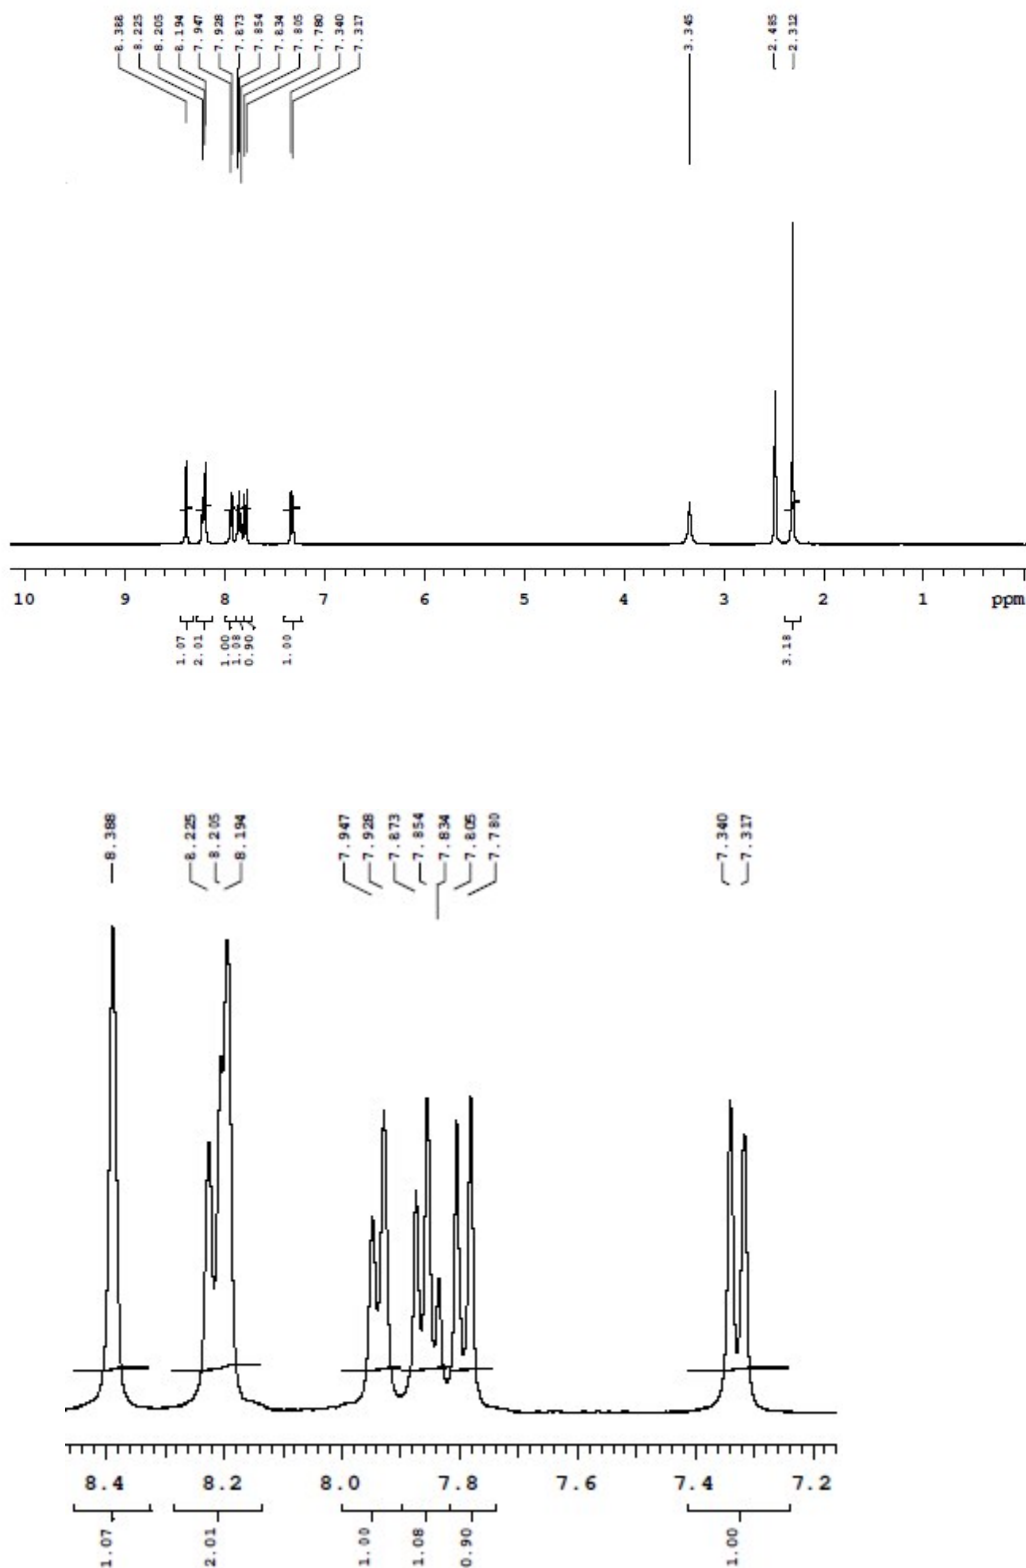

**Figure S65.**  $^1\text{H}$  NMR Spectra & its expansion for compound **6g** in  $\text{DMSO}-d_6$

NUCLEUS : C13  
 FREQ (MHz) : 100.50  
 AT (sec) : 1.28  
 SW (ppm) : 253.84  
 RD (sec) : 1.00  
 DW (usec) : 5.05  
 Scans : 2000  
 Solvent : dmsd  
 Data Points : 65536  
 LB (Hz) : 3.00  
 TEMP (K) : 303.15  
 EXP : s2pul  
 DATE : Feb 13 2016  
 System : VNMRS\_400

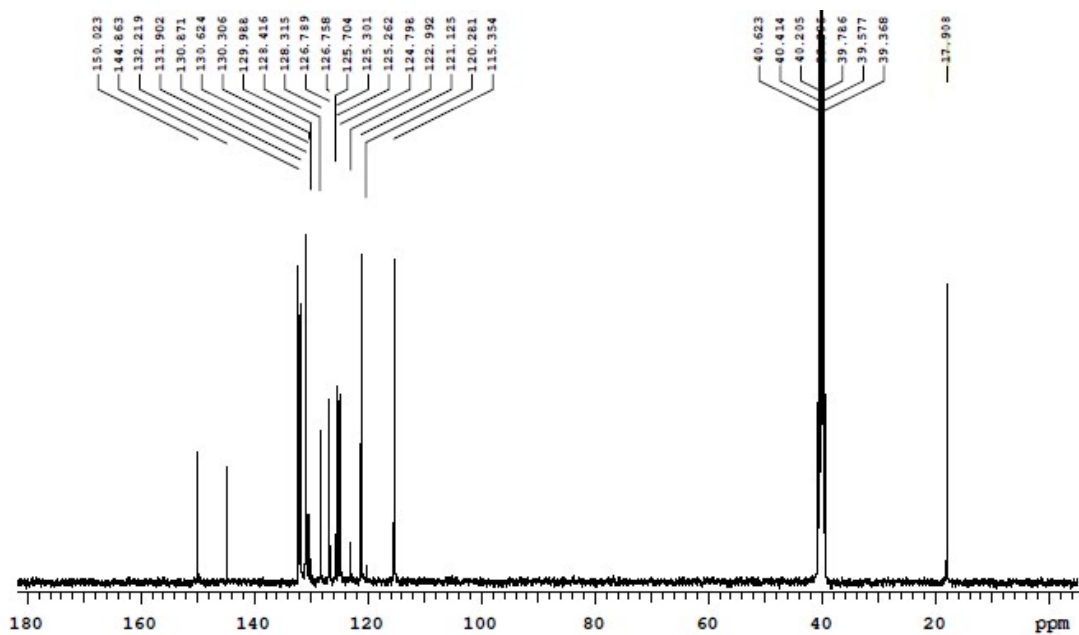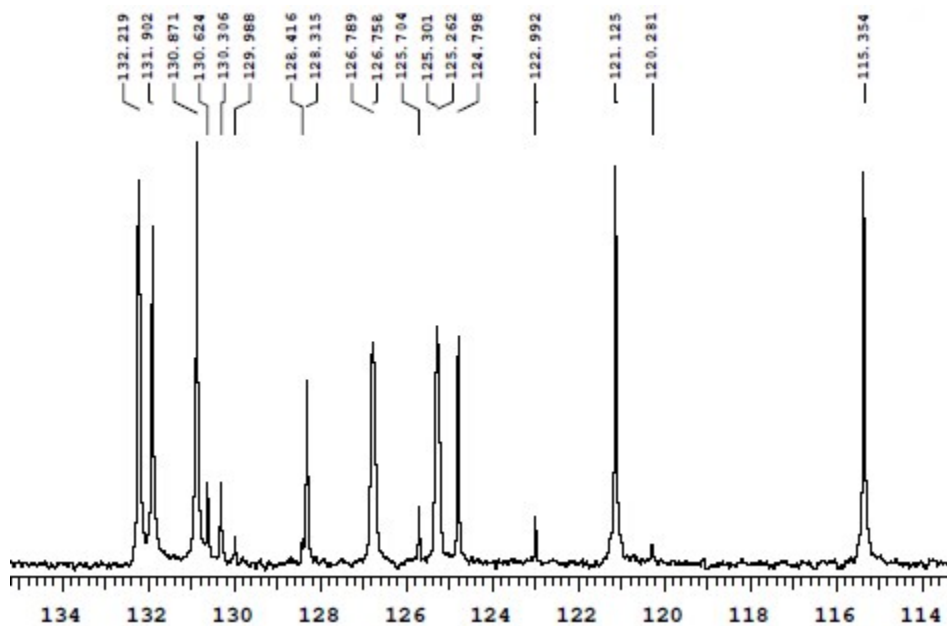

**Figure S66.**  $^{13}\text{C}$  NMR Spectra & its expansion for compound **6g** in  $\text{DMSO-}d_6$

NUCLEUS : H1  
 FREQ (MHz) : 399.64  
 AT (sec) : 2.27  
 SW (ppm) : 18.08  
 RD (sec) : 1.00  
 DW (usec) : 6.60  
 Scans : 64  
 Solvent : DMSO  
 Data Points : 32768  
 LB (Hz) : 1.00  
 TEMP (K) : 303.15  
 EXP : s2pul1  
 DATE : Feb 10 2016  
 System : VNMRS\_400

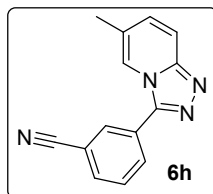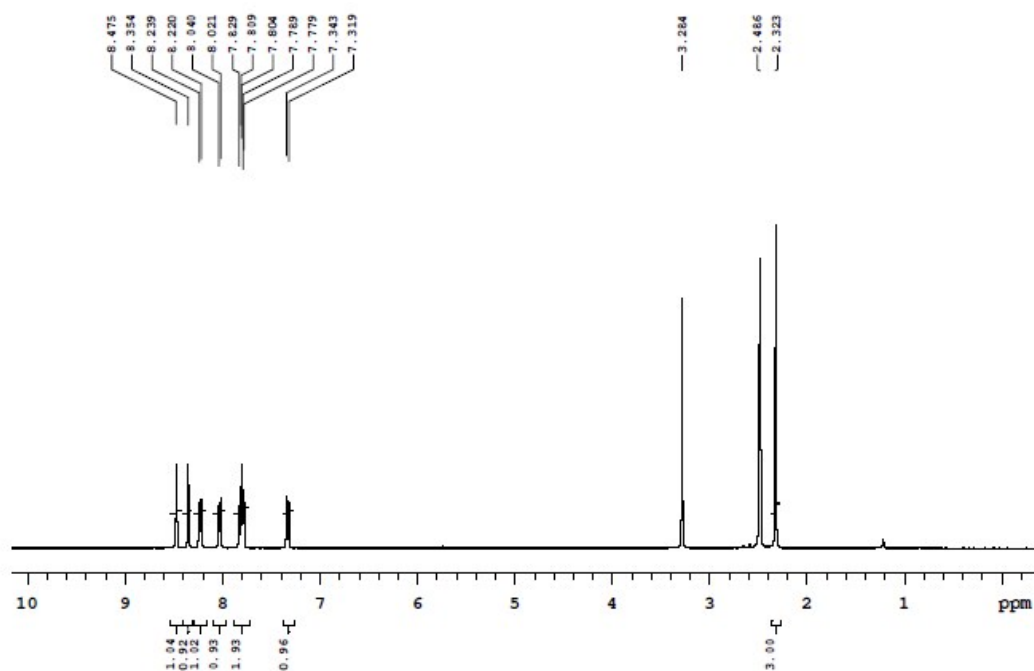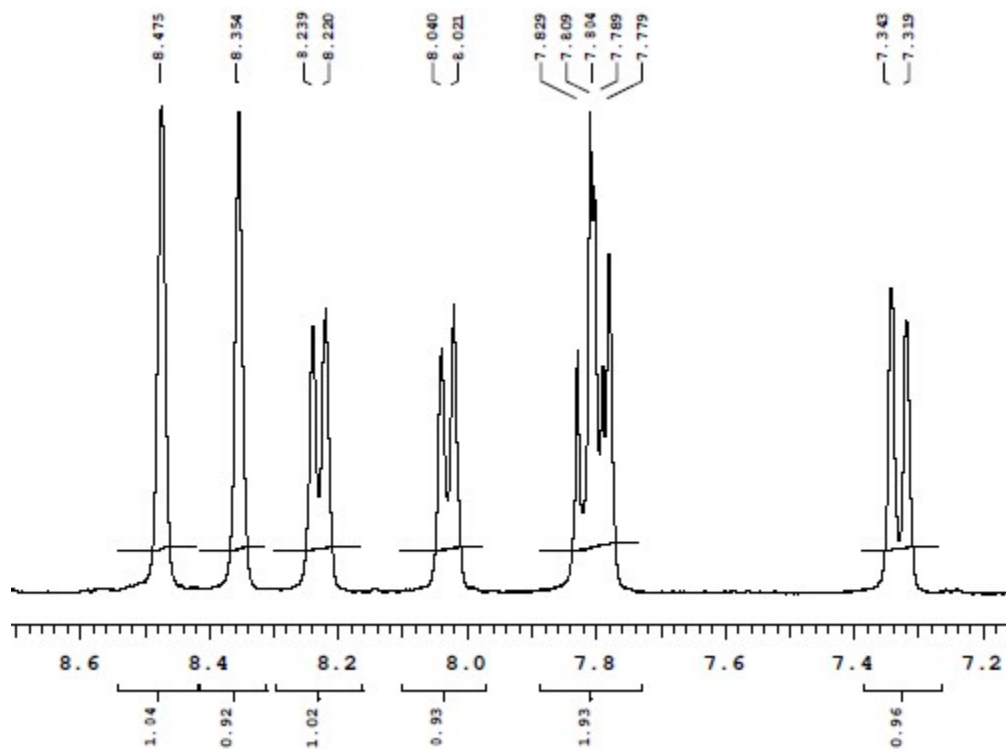

**Figure S67.**  $^1\text{H}$  NMR Spectra & its expansion for compound **6h** in  $\text{DMSO}-d_6$

NUCLEUS : C13  
 FRQ (MHz) : 100.50  
 AT (sec) : 1.28  
 SW (ppm) : 253.84  
 RD (sec) : 1.00  
 PW (usec) : 5.05  
 Scans : 1000  
 Solvent : dmsc  
 Data Points : 65536  
 LB (Hz) : 5.00  
 TEMP (K) : 303.15  
 EXP : s2pul  
 DATE : Feb 11 2016  
 System : VNMR5\_400

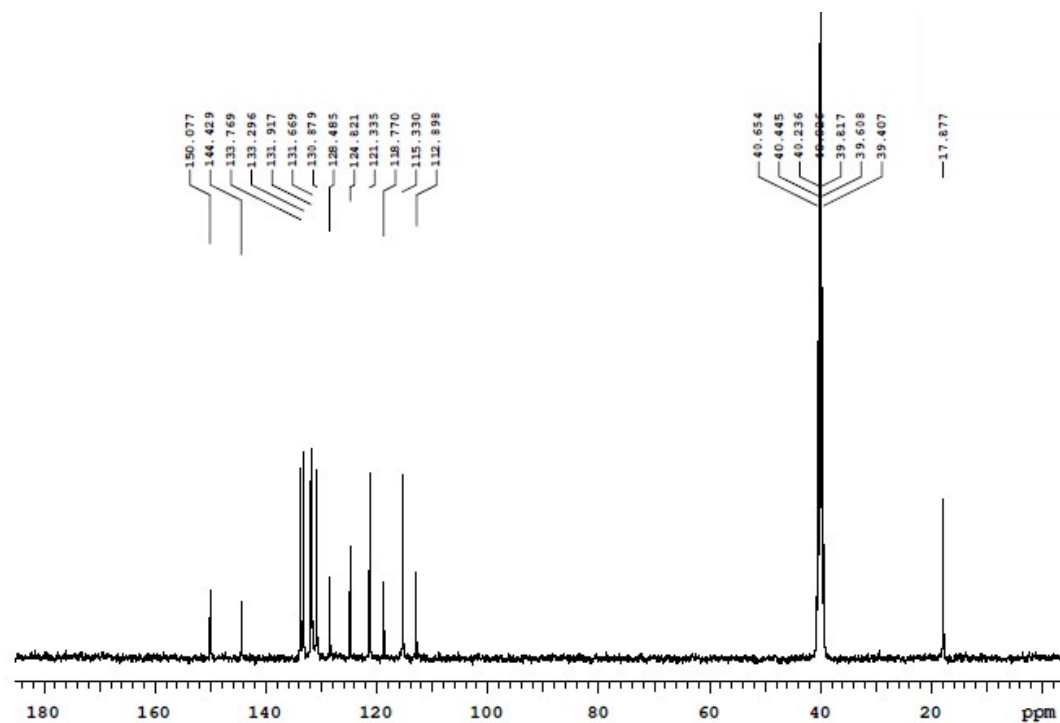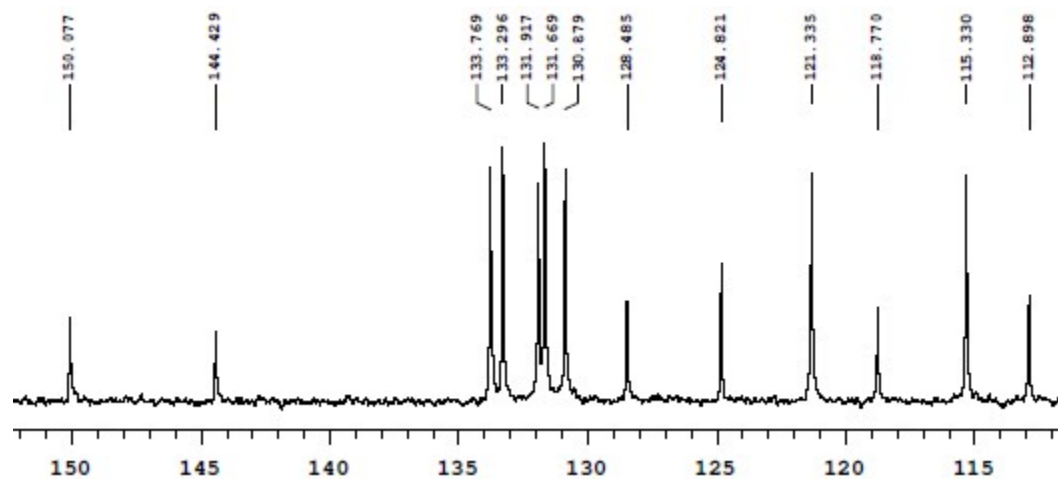

**Figure S68.**  $^{13}\text{C}$  NMR Spectra & its expansion for compound **6h** in  $\text{DMSO-}d_6$

NUCLEUS : H1  
 FRQ (MHz) : 399.64  
 AT (sec) : 2.27  
 SW (ppm) : 18.08  
 RD (sec) : 1.00  
 PW (usec) : 6.60  
 Scans : 64  
 Solvent : dmsd  
 Data Points : 32768  
 LB (Hz) : 1.00  
 TEMP (K) : 303.15  
 EXP : s2pul  
 DATE : Feb 9 2016  
 System : VNMR5\_400

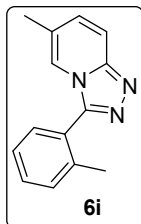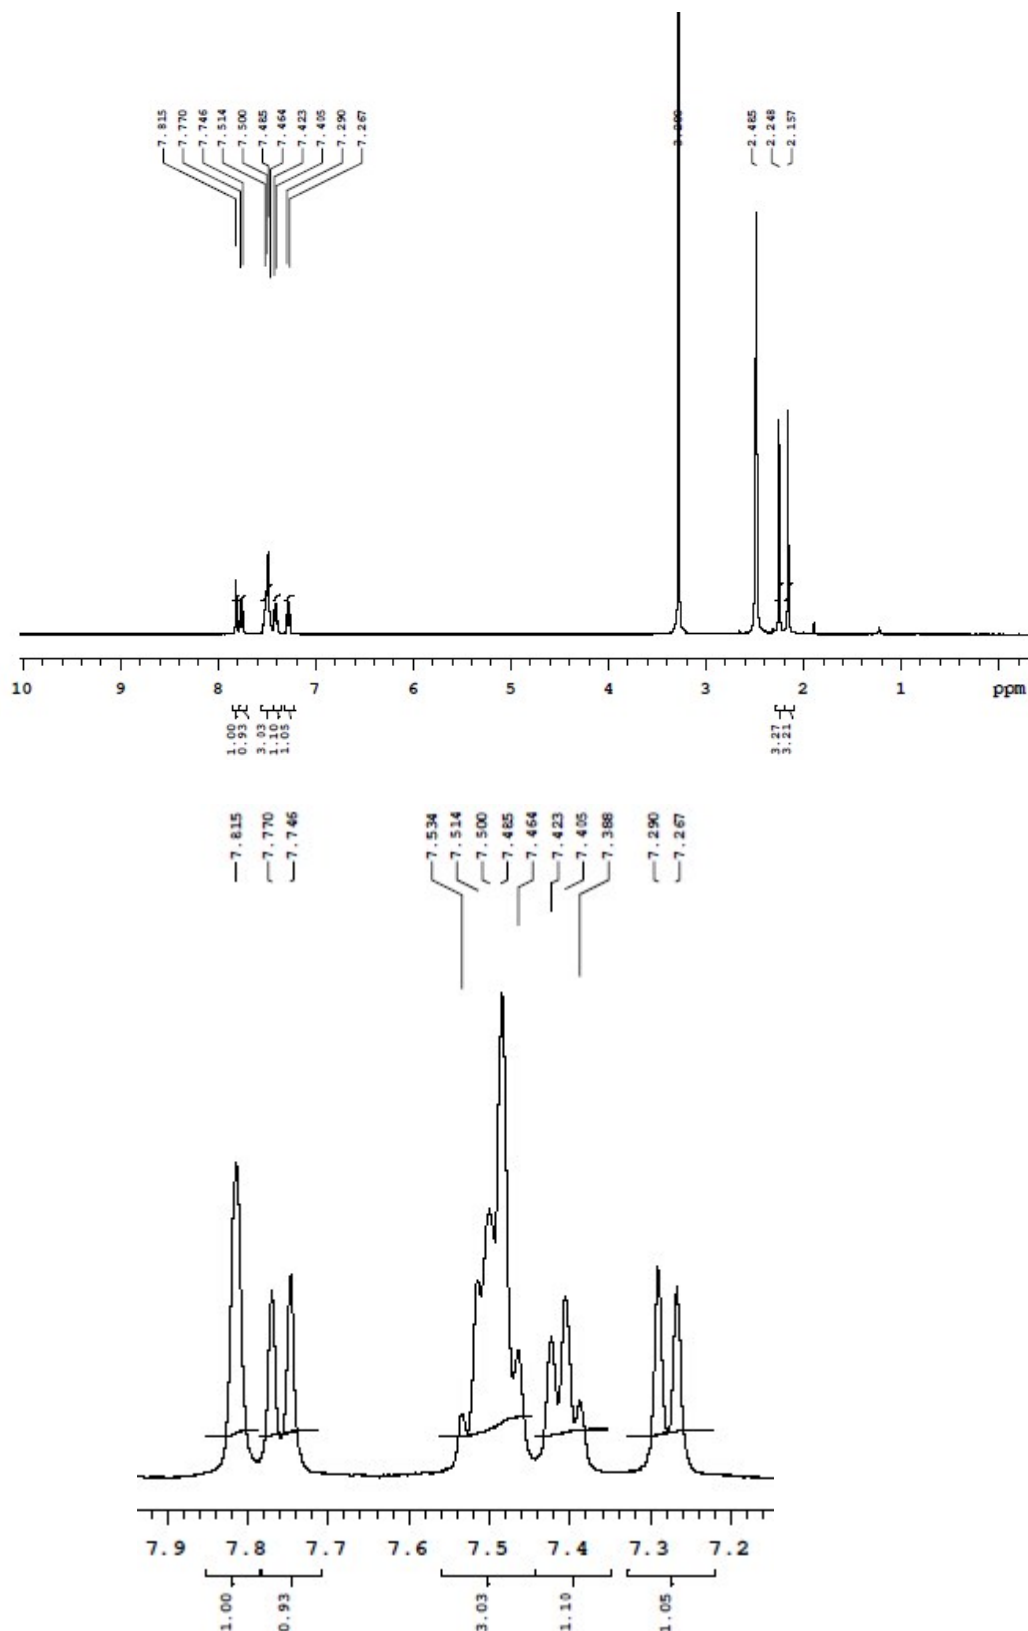

**Figure S69.**  $^1\text{H}$  NMR Spectra & its expansion for compound **6i** in  $\text{DMSO}-d_6$

NUCLEUS : C13  
 FRQ (MHz) : 100.50  
 AT (sec) : 1.28  
 SW (ppm) : 253.84  
 RD (sec) : 1.00  
 FWH (usec) : 5.05  
 Scans : 1000  
 Solvent : dmsc  
 Data Points : 65536  
 LB (Hz) : 5.00  
 TEMP (K) : 303.15  
 EXP : s2pul  
 DATE : Feb 10 2016  
 System : VNMR-400

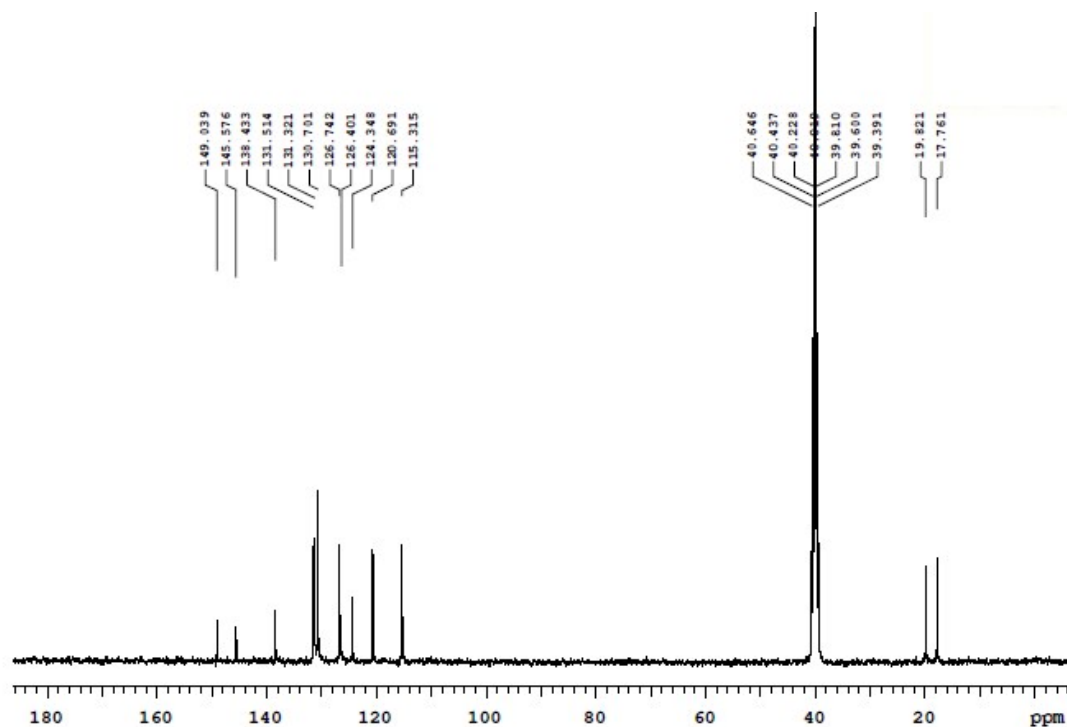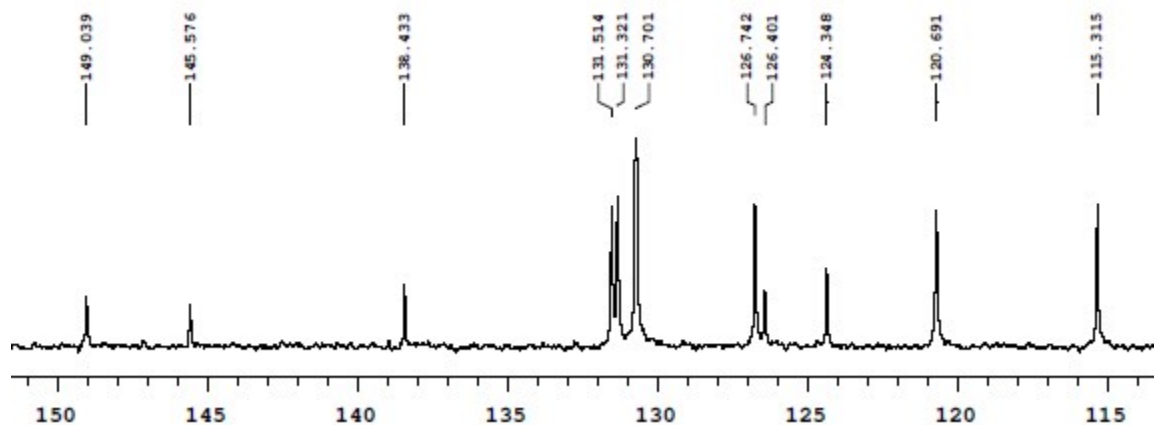

**Figure S70.**  $^{13}\text{C}$  NMR Spectra & its expansion for compound **6i** in  $\text{DMSO-}d_6$

NUCLEUS : H1  
 FRQ (MHz) : 399.64  
 AT (sec) : 2.27  
 SW (ppm) : 18.08  
 RD (sec) : 1.00  
 PW (usec) : 6.60  
 Scans : 64  
 Solvent : dmsd  
 Data Points : 32768  
 LB (Hz) : 1.00  
 TEMP (K) : 303.15  
 EXP : s2pul  
 DATE : Feb 9 2016  
 System : VNMRS\_400

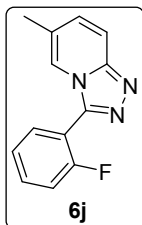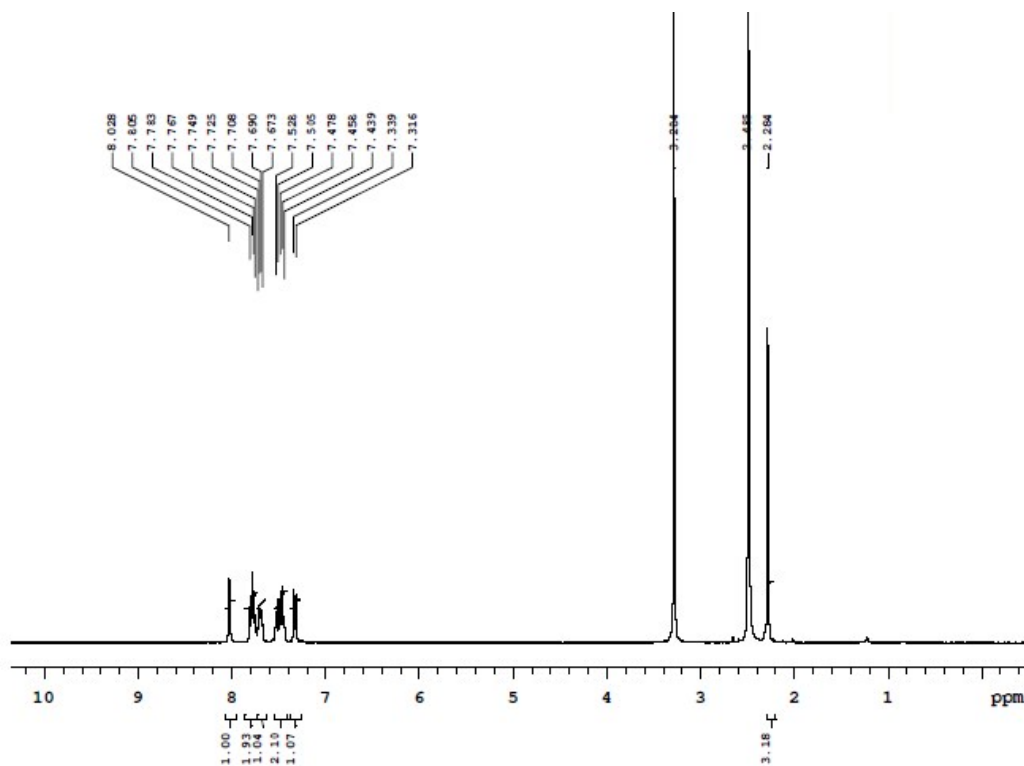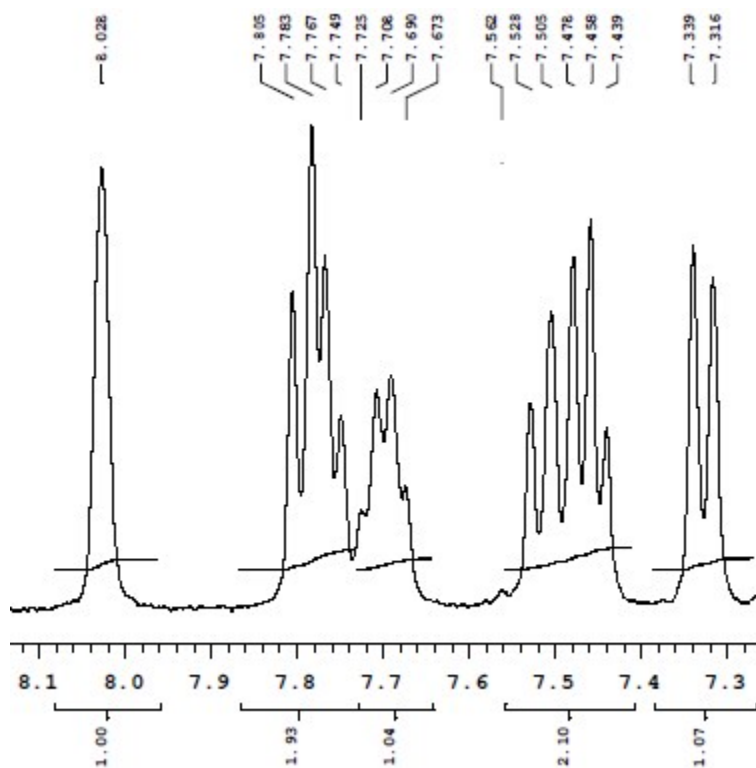

**Figure S71.**  $^1\text{H}$  NMR Spectra & its expansion for compound **6j** in  $\text{DMSO-}d_6$

NUCLEUS : C13  
 FREQ (MHz) : 100.50  
 AT (sec) : 1.28  
 SW (ppm) : 253.84  
 RD (sec) : 1.00  
 PW (usec) : 5.05  
 Scans : 1000  
 Solvent : dmsc  
 Data Points : 65536  
 LB (Hz) : 5.00  
 TEMP (K) : 303.15  
 EXP : s2pul  
 DATE : Feb 11 2016  
 System : VNMRS\_400

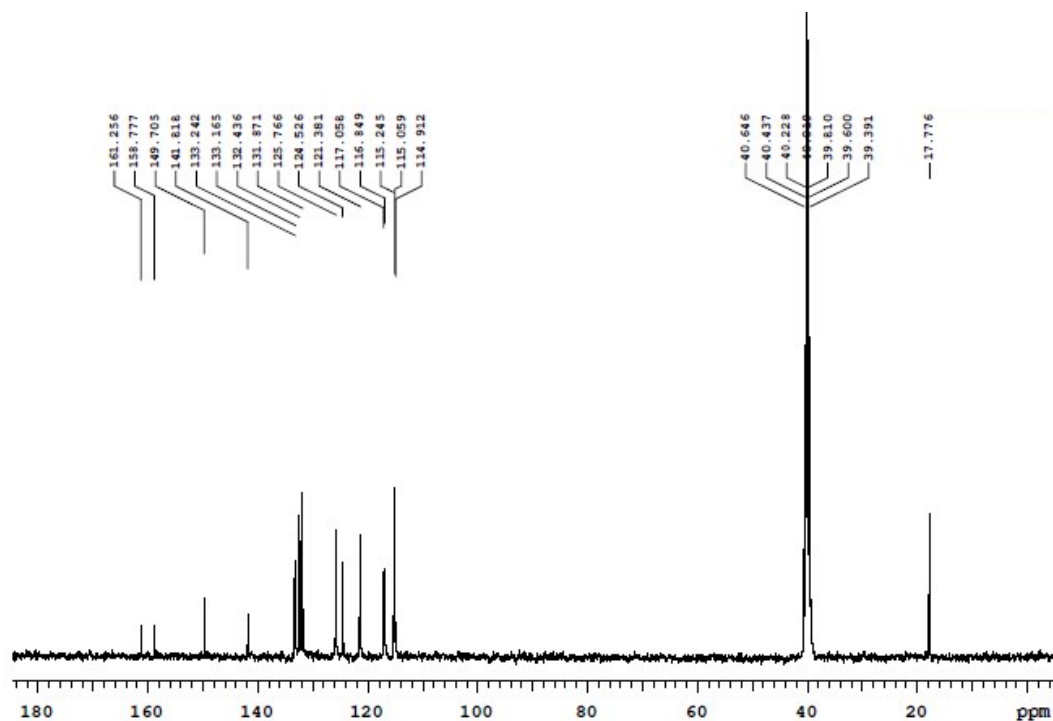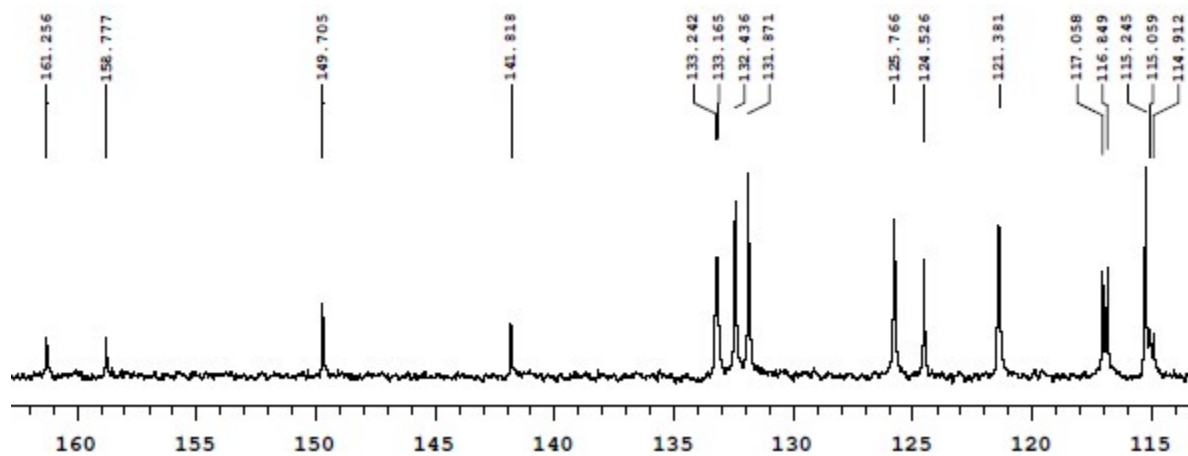

**Figure S72.**  $^{13}\text{C}$  NMR Spectra & its expansion for compound **6j** in  $\text{DMSO-}d_6$

NUCLEUS : H1  
 FRQ (MHz) : 399.64  
 AT (sec) : 2.27  
 SW (ppm) : 18.08  
 RD (sec) : 1.00  
 PW (usec) : 6.40  
 Scans : 32  
 Solvent : dmsc  
 Data Points : 32768  
 LB (Hz) : 2.00  
 TEMP (K) : 303.15  
 EXP : sfp1  
 DATE : Feb 3 2016  
 System : VNMR\_400

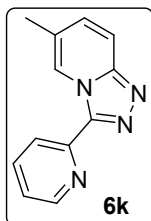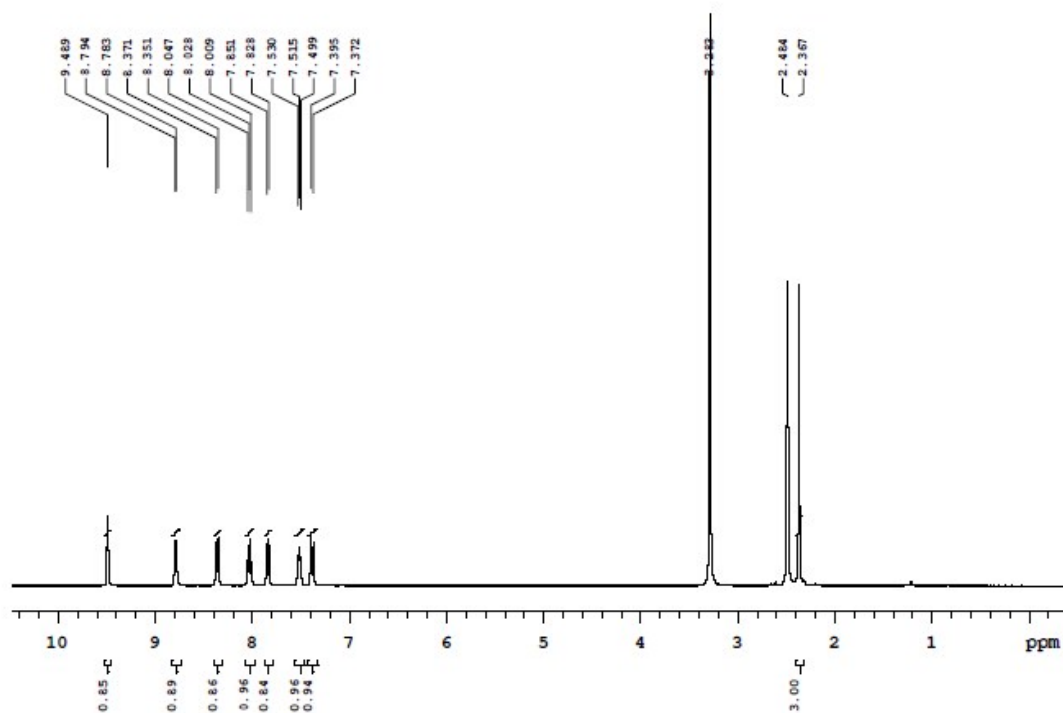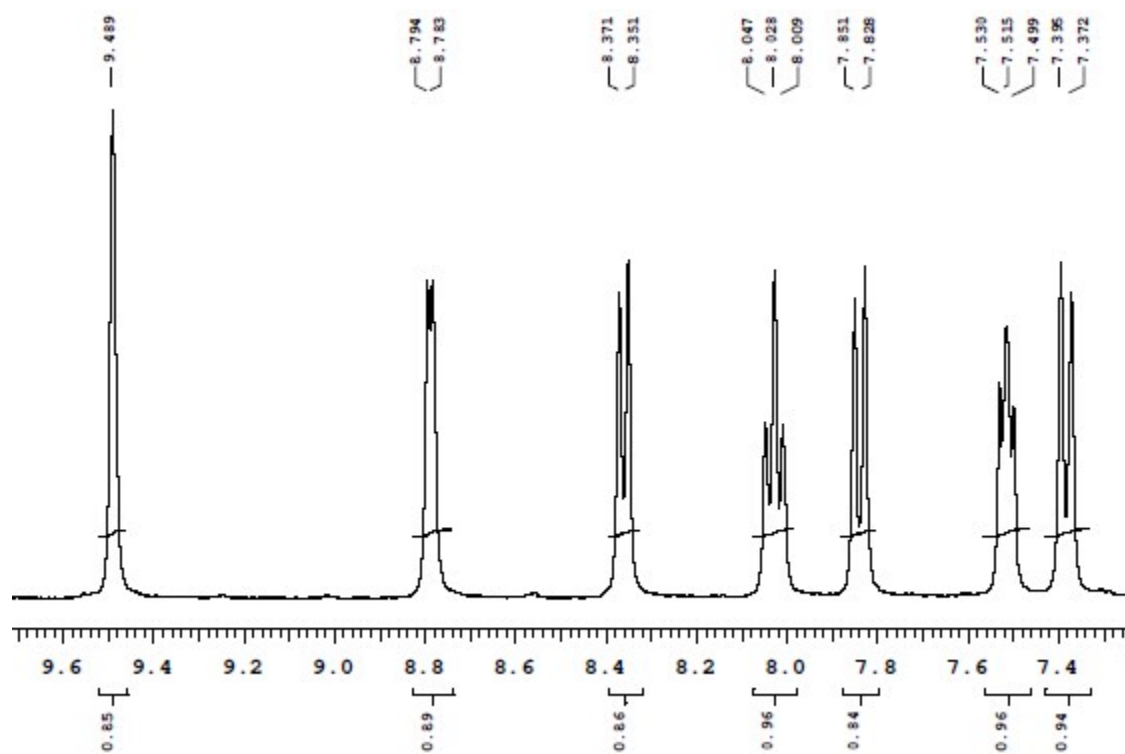

**Figure S73.**  $^1\text{H}$  NMR Spectra & its expansion for compound **6k** in  $\text{DMSO-}d_6$

NUCLEUS : C13  
 FRQ (MHz) : 100.50  
 AT (sec) : 1.28  
 SW (ppm) : 253.84  
 RD (sec) : 1.00  
 PW (usec) : 5.05  
 Scans : 1000  
 Solvent : DMSO  
 Data Points : 65536  
 LB (Hz) : 4.00  
 TEMP (K) : 303.15  
 EXP : s2pul  
 DATE : Feb 9 2016  
 System : VNMRS-400

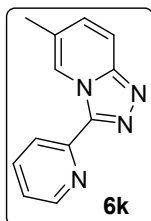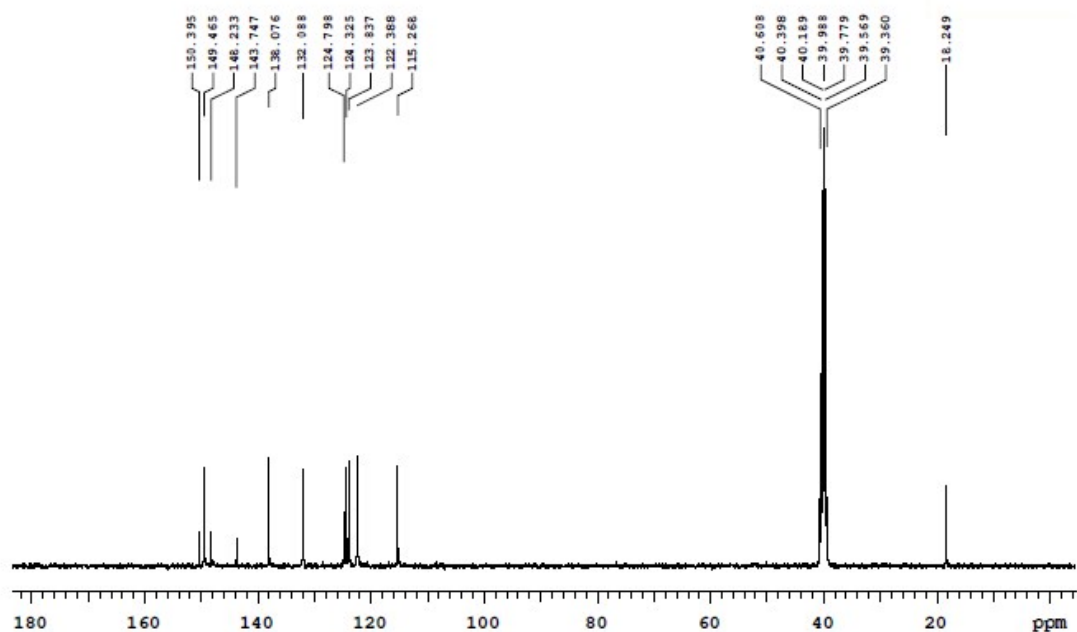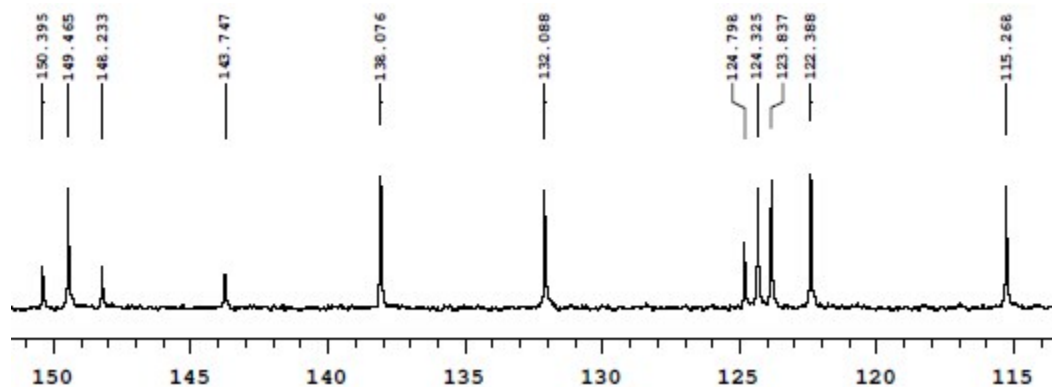

**Figure S74.**  $^{13}\text{C}$  NMR Spectra & its expansion for compound **6k** in  $\text{DMSO}-d_6$

NUCLEUS : R1  
 FRQ (MHz) : 399.64  
 AT (sec) : 2.27  
 SW (ppm) : 18.08  
 RD (sec) : 1.00  
 DW (usec) : 6.40  
 Scans : 32  
 Solvent : dmsc  
 Data Points : 32768  
 LB (Hz) : 2.00  
 TEMP (K) : 303.15  
 EXP : s2pol  
 DATE : Feb 3 2016  
 System : VNM6S-400

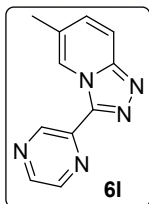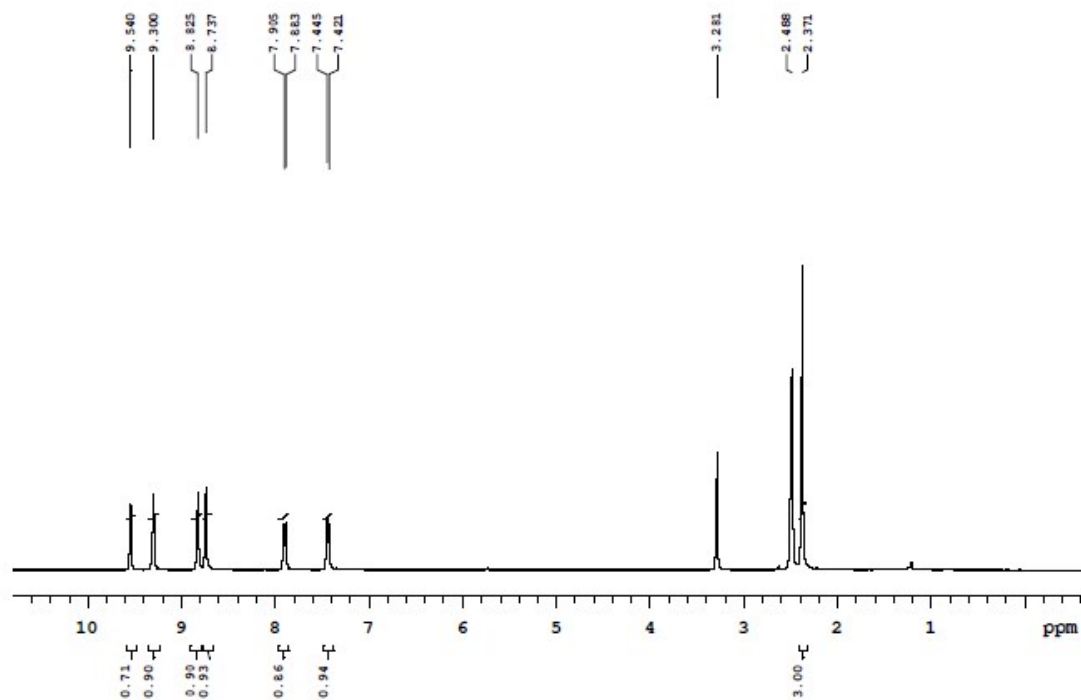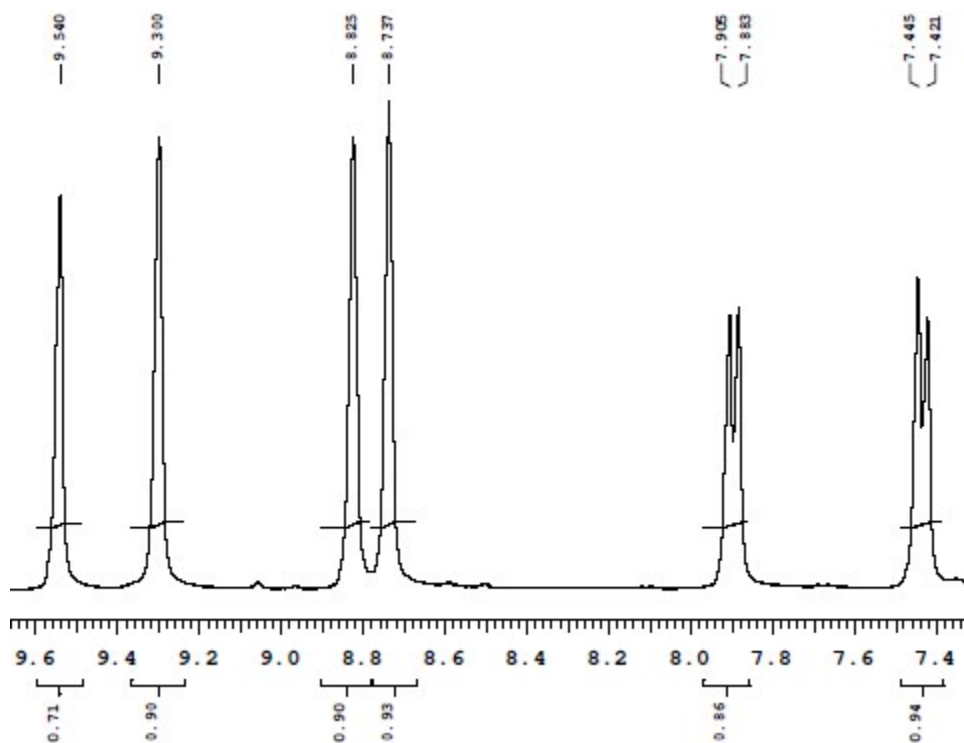

**Figure S75.**  $^1\text{H}$  NMR Spectra & its expansion for compound **6l** in  $\text{DMSO}-d_6$

NUCLEUS : C13  
 FRQ (MHz) : 100.50  
 AT (sec) : 1.28  
 SW (ppm) : 253.84  
 RD (sec) : 1.00  
 PW (usec) : 5.05  
 Scans : 1000  
 Solvent : dmsd  
 Data Points : 65536  
 LB (Hz) : 4.00  
 TEMP (K) : 303.15  
 EXP : s2pul  
 DATE : Feb 9 2016  
 System : VNMRS\_400

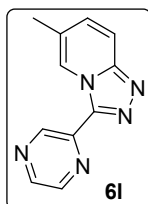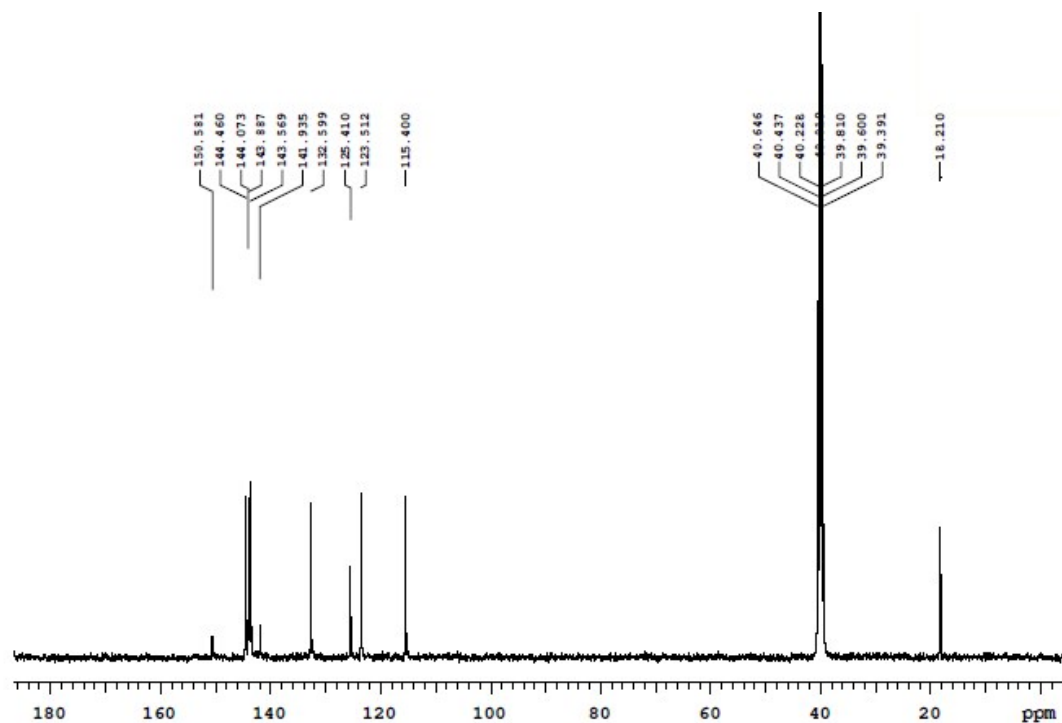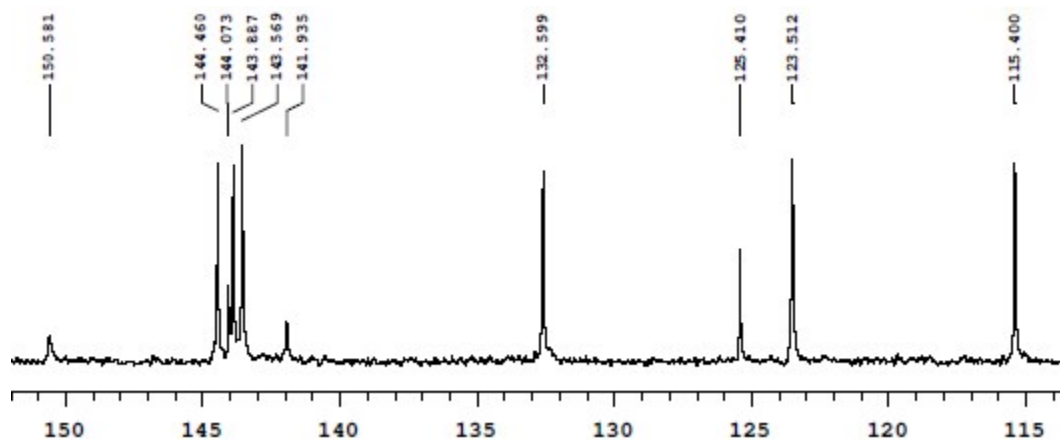

**Figure S76.**  $^{13}\text{C}$  NMR Spectra & its expansion for compound **6l** in  $\text{DMSO-}d_6$

NUCLEUS : H1  
 FRQ (MHz) : 399.64  
 AT (sec) : 2.27  
 SW (ppm) : 18.08  
 RD (sec) : 1.00  
 PW (usec) : 6.40  
 Scans : 32  
 Solvent : dmsc  
 Data Points : 32768  
 LB (Hz) : 2.00  
 TEMP (K) : 303.15  
 EXP : s2pul  
 DATE : Feb 3 2016  
 System : VNMR5\_400

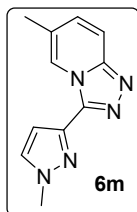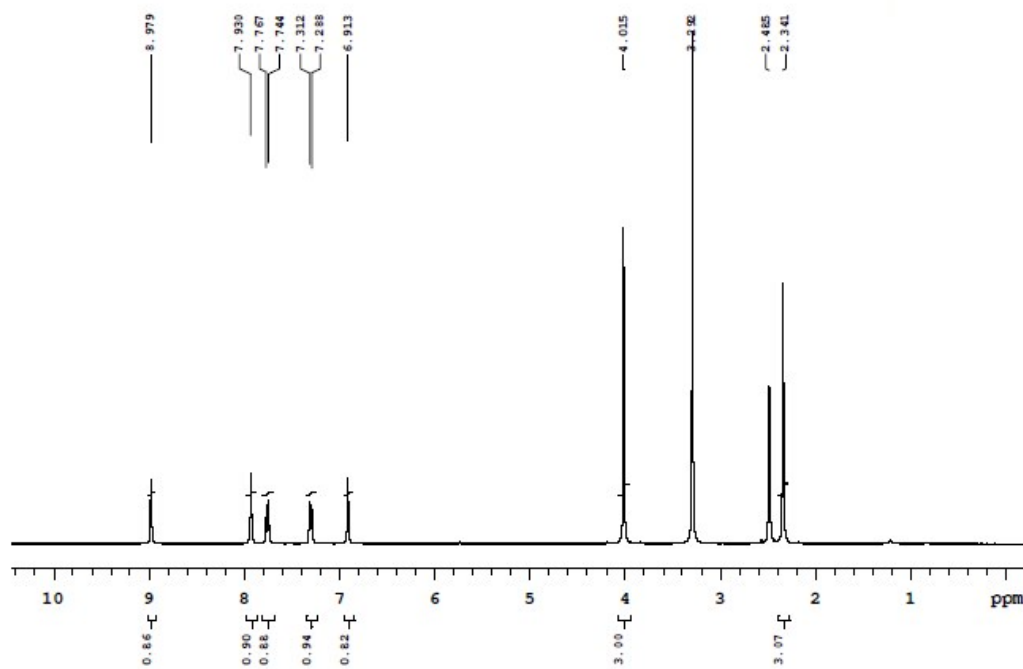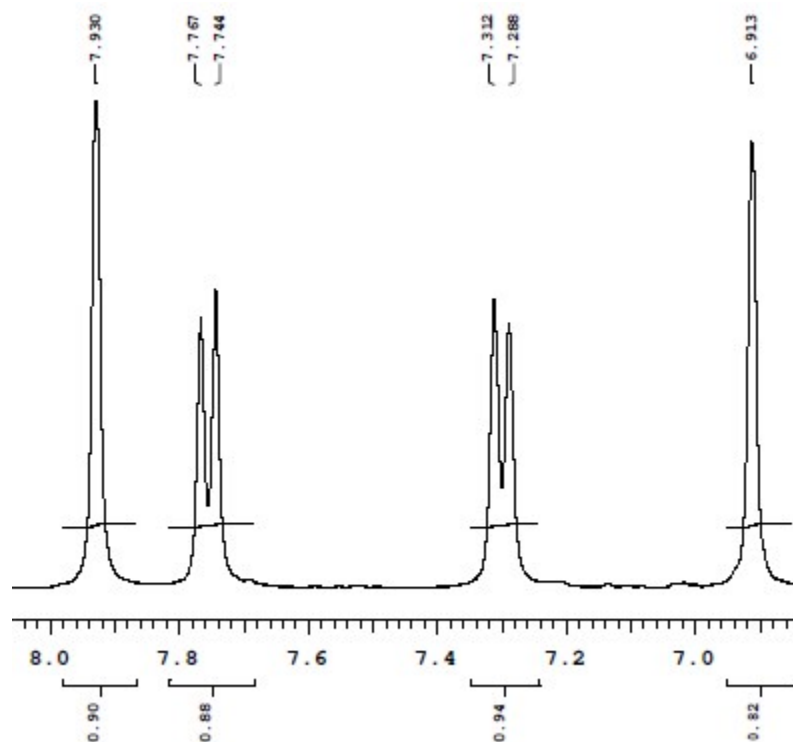

**Figure S77.**  $^1\text{H}$  NMR Spectra & its expansion for compound **6m** in  $\text{DMSO-}d_6$

NUCLEUS : C13  
 FRQ (MHz) : 100.50  
 AT (sec) : 1.28  
 SW (ppm) : 253.84  
 RD (sec) : 1.00  
 PW (usec) : 5.05  
 Scans : 1000  
 Solvent : dmsc  
 Data Points : 65536  
 LB (Hz) : 4.00  
 TEMP (K) : 303.15  
 EXP : s2pol  
 DATE : Feb 9 2016  
 System : VNMR5\_400

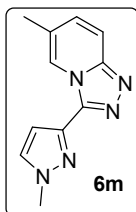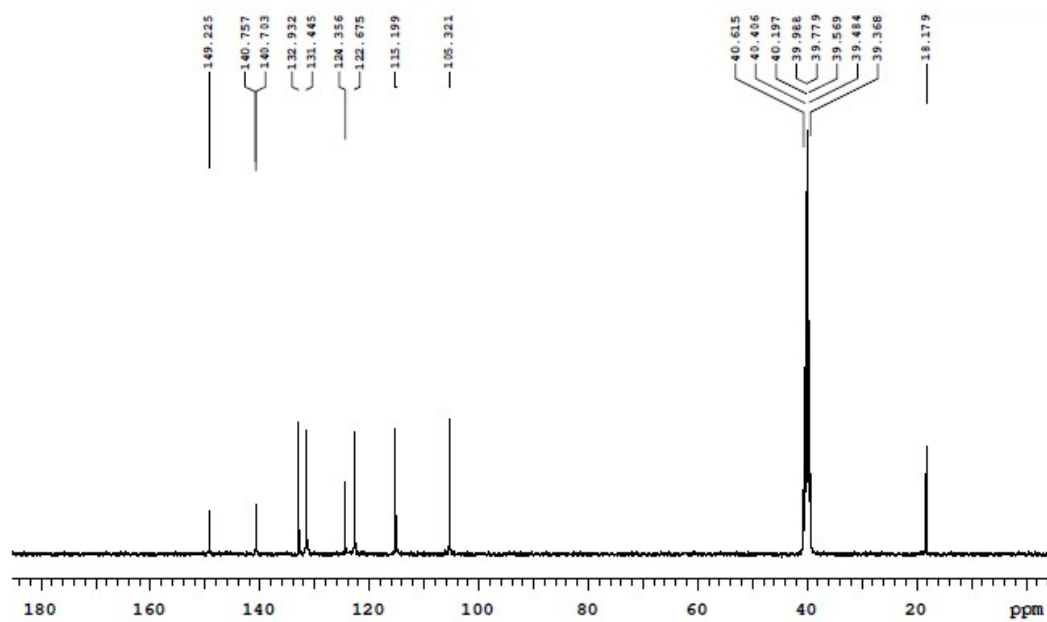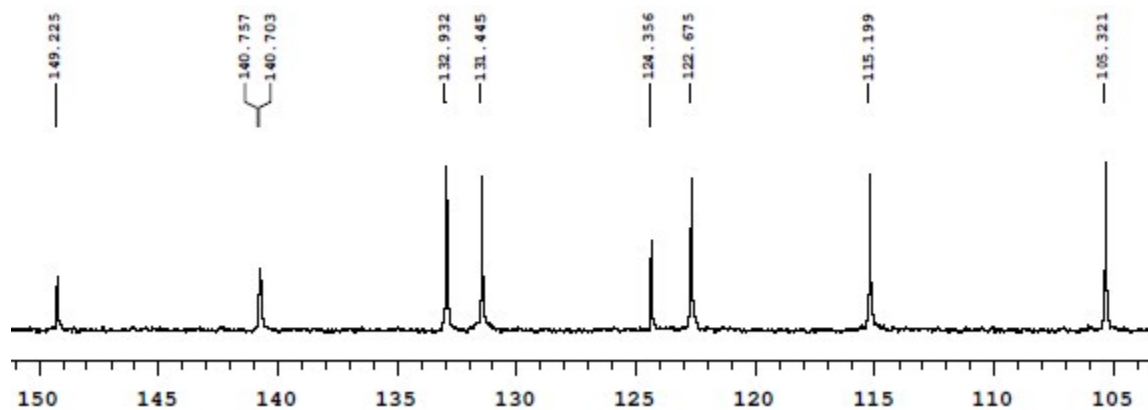

**Figure S78.**  $^{13}\text{C}$  NMR Spectra & its expansion for compound **6m** in  $\text{DMSO-}d_6$

NUCLEUS : H1  
 FRQ (MHz) : 399.64  
 AT (sec) : 2.27  
 SW (ppm) : 18.08  
 RD (sec) : 1.00  
 DW (usec) : 6.40  
 Scans : 32  
 Solvent : dmsc  
 Data Points : 32768  
 LB (Hz) : 2.00  
 TEMP (K) : 303.15  
 EXP : s2pul  
 DATE : Feb 3 2016  
 System : VNMR-400

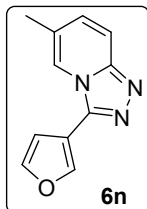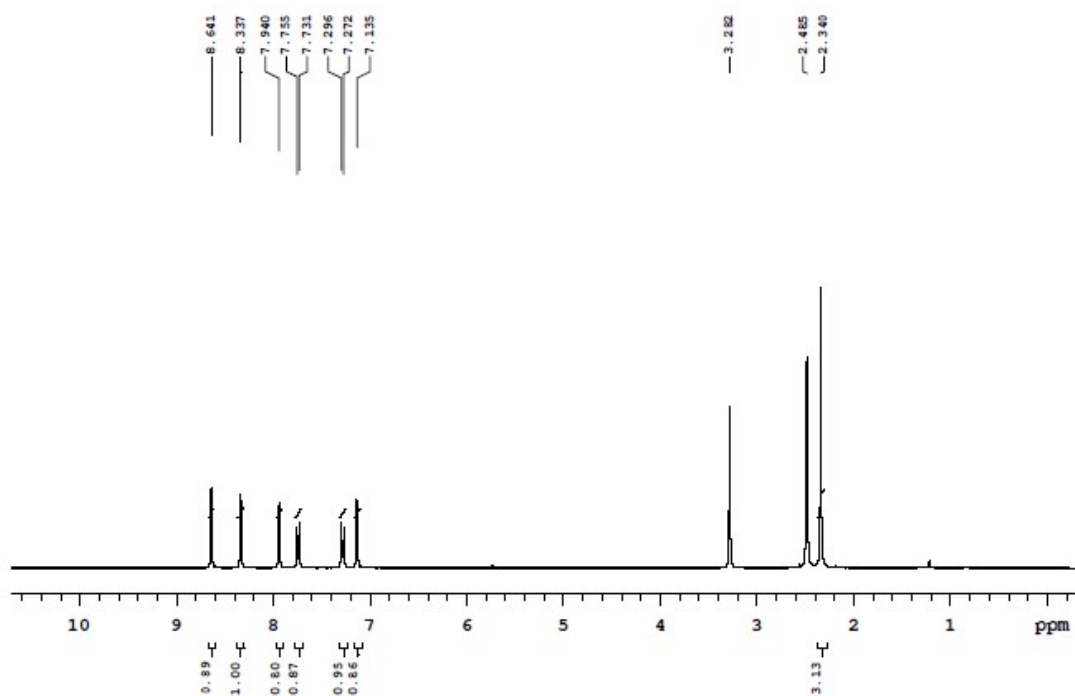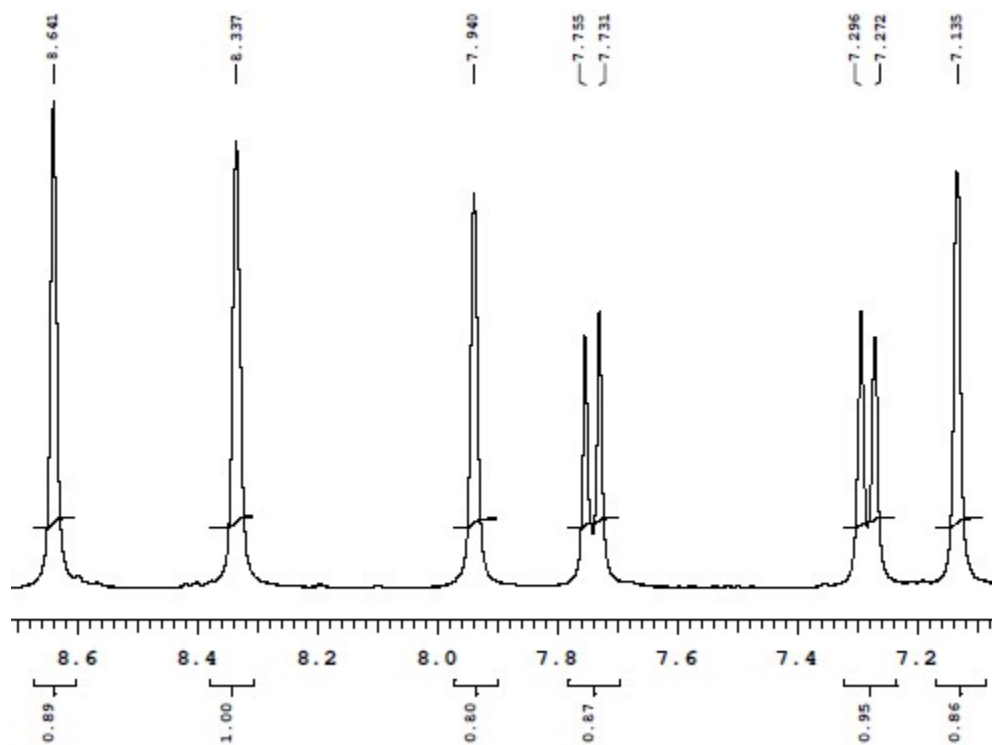

**Figure S79.**  $^1\text{H}$  NMR Spectra & its expansion for compound **6n** in  $\text{DMSO}-d_6$

NUCLEUS : C13  
 FREQ (MHz) : 100.50  
 AT (sec) : 1.28  
 SW (ppm) : 253.84  
 RD (sec) : 1.00  
 DW (usec) : 5.05  
 Scans : 1000  
 Solvent : dmsd  
 Data Points : 65536  
 LB (Hz) : 4.00  
 TEMP (K) : 303.15  
 EXP : zgpg30  
 DATE : Feb 9 2016  
 System : VNMRS-400

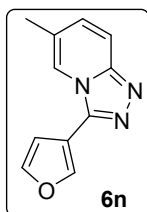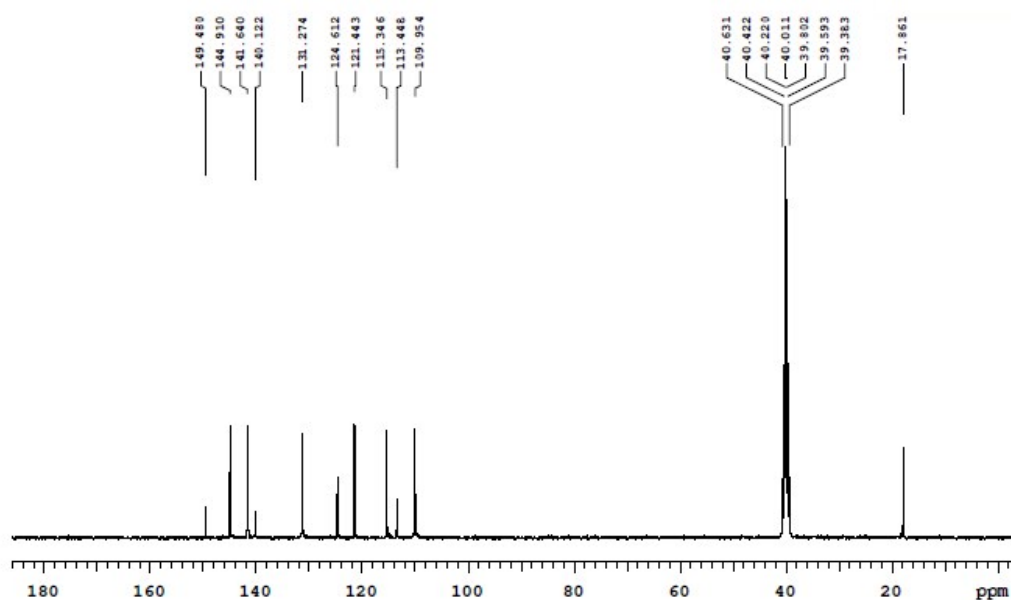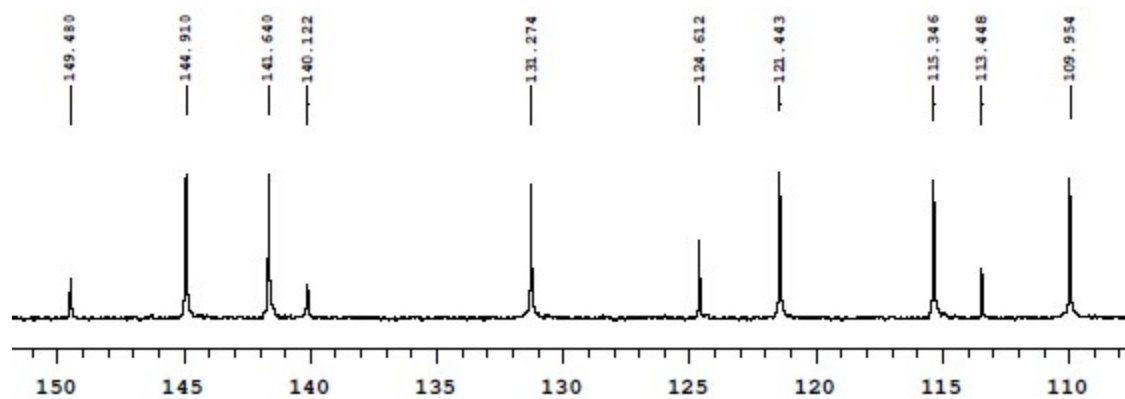

**Figure S80.**  $^{13}\text{C}$  NMR Spectra & its expansion for compound **6n** in  $\text{DMSO}-d_6$

NUCLEUS : H1  
 FREQ (MHz) : 399.64  
 AT (sec) : 2.27  
 SW (ppm) : 18.08  
 RD (sec) : 1.00  
 PW (usec) : 6.40  
 Scans : 32  
 Solvent : dmsd  
 Data Points : 32768  
 LB (Hz) : 2.00  
 TEMP (K) : 303.15  
 EXP : s2pul  
 DATE : Feb 2 2016  
 System : VNMR5\_400

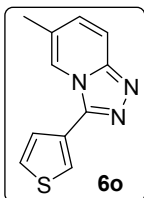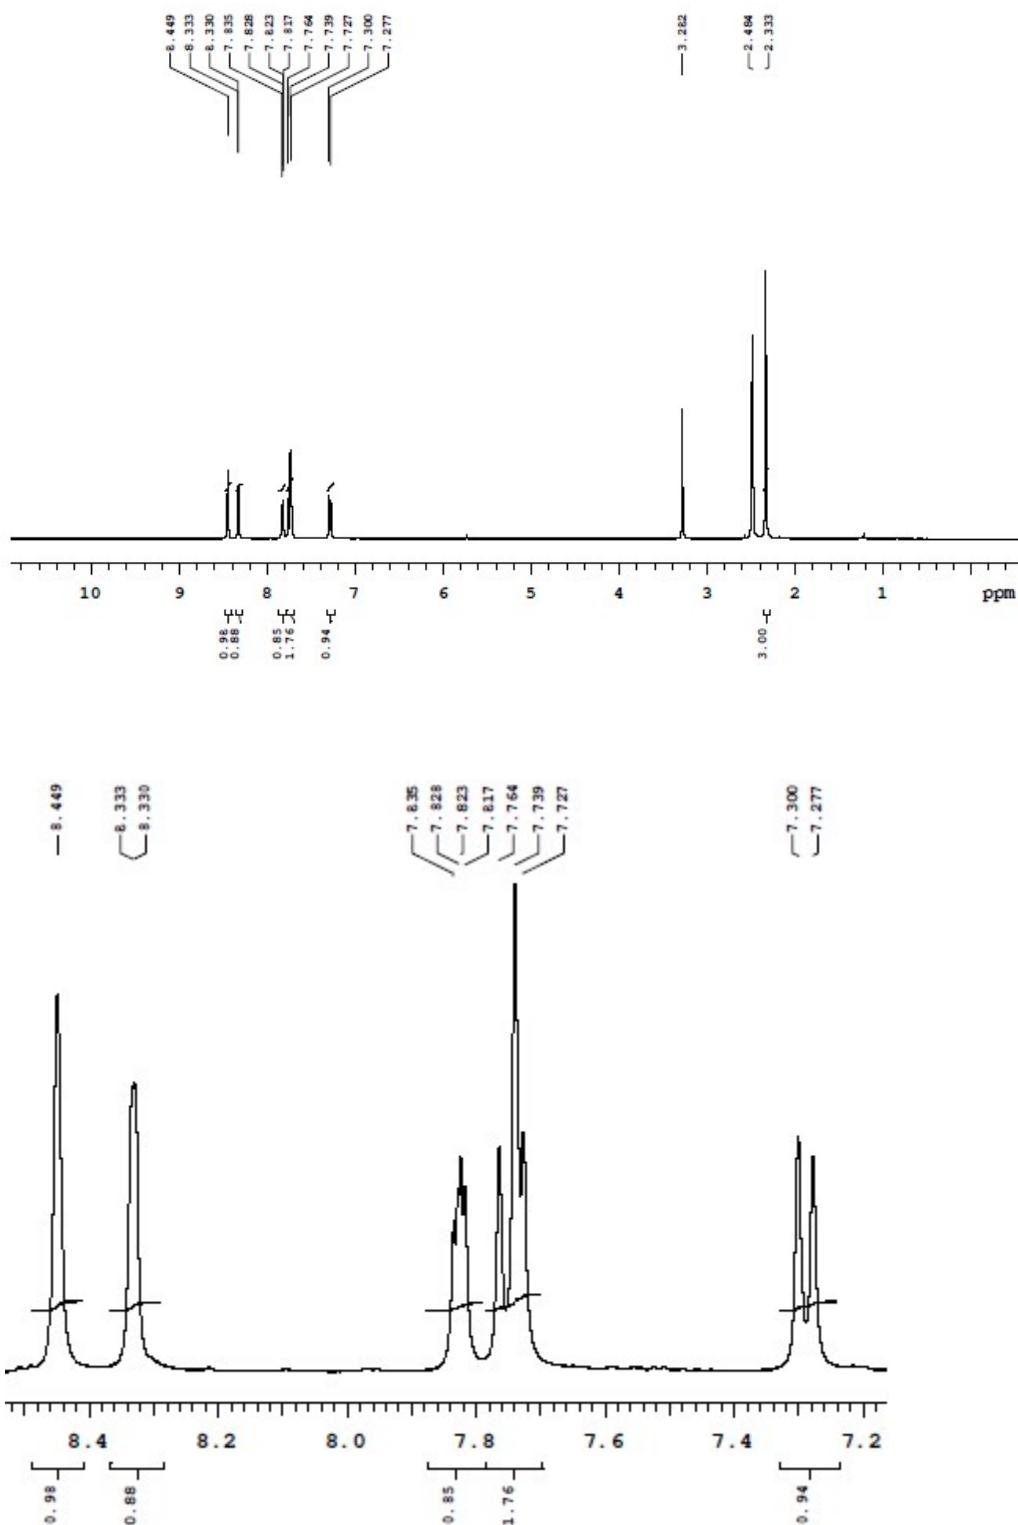

**Figure S81.**  $^1\text{H}$  NMR Spectra & its expansion for compound **6o** in  $\text{DMSO-}d_6$

NUCLEUS : C13  
 FREQ (MHz) : 100.50  
 AT (sec) : 1.28  
 SW (ppm) : 253.84  
 RE (sec) : 1.00  
 PW (usec) : 5.05  
 Scans : 1000  
 Solvent : dmsd  
 Data Points : 65536  
 LB (Hz) : 5.00  
 TEMP (K) : 303.15  
 EXP : zgpg30  
 DATE : Feb 3 2016  
 System : VNMRB\_400

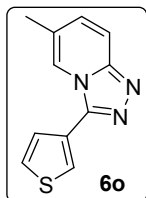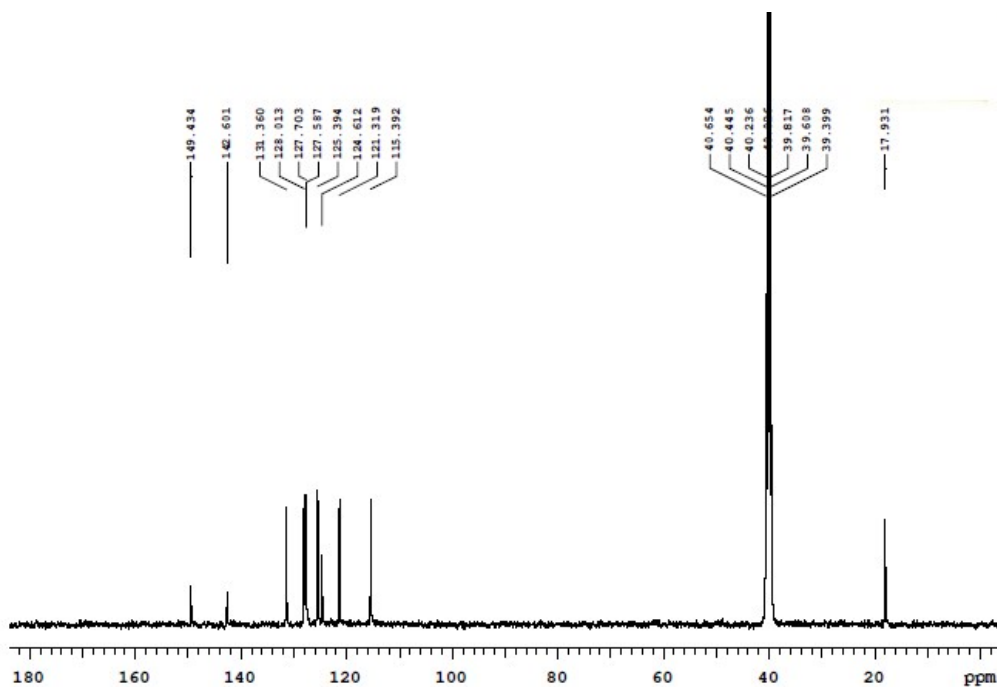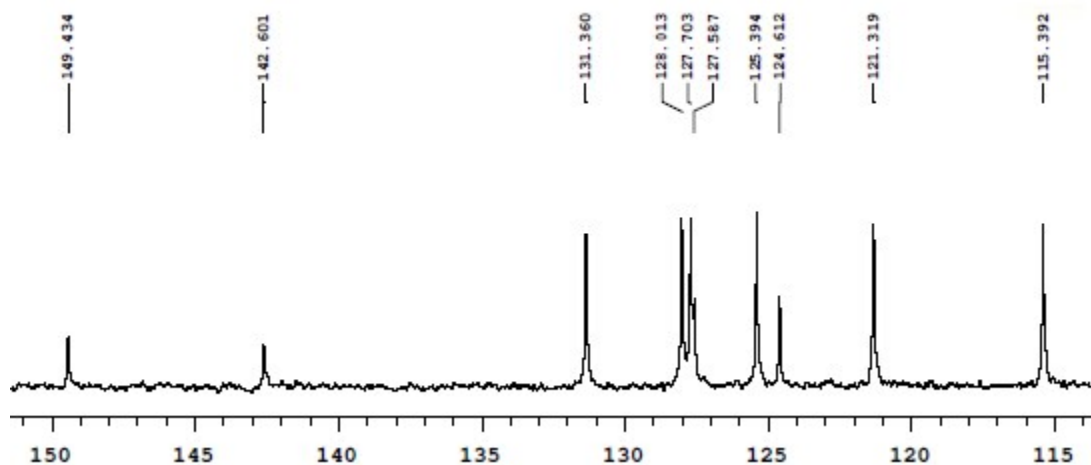

**Figure S82.**  $^{13}\text{C}$  NMR Spectra & its expansion for compound **6o** in  $\text{DMSO}-d_6$

NUCLEUS : H1  
 FRQ (MHz) : 399.64  
 AT (sec) : 2.27  
 SW (ppm) : 18.08  
 RD (sec) : 1.00  
 PW (usec) : 6.40  
 Scans : 32  
 Solvent : DMSO  
 Data Points : 32768  
 LB (Hz) : 2.00  
 TEMP (K) : 303.15  
 EXP : szpu1  
 DATE : Feb 2 2016  
 System : VNMRS\_400

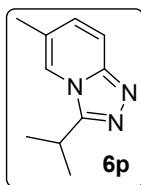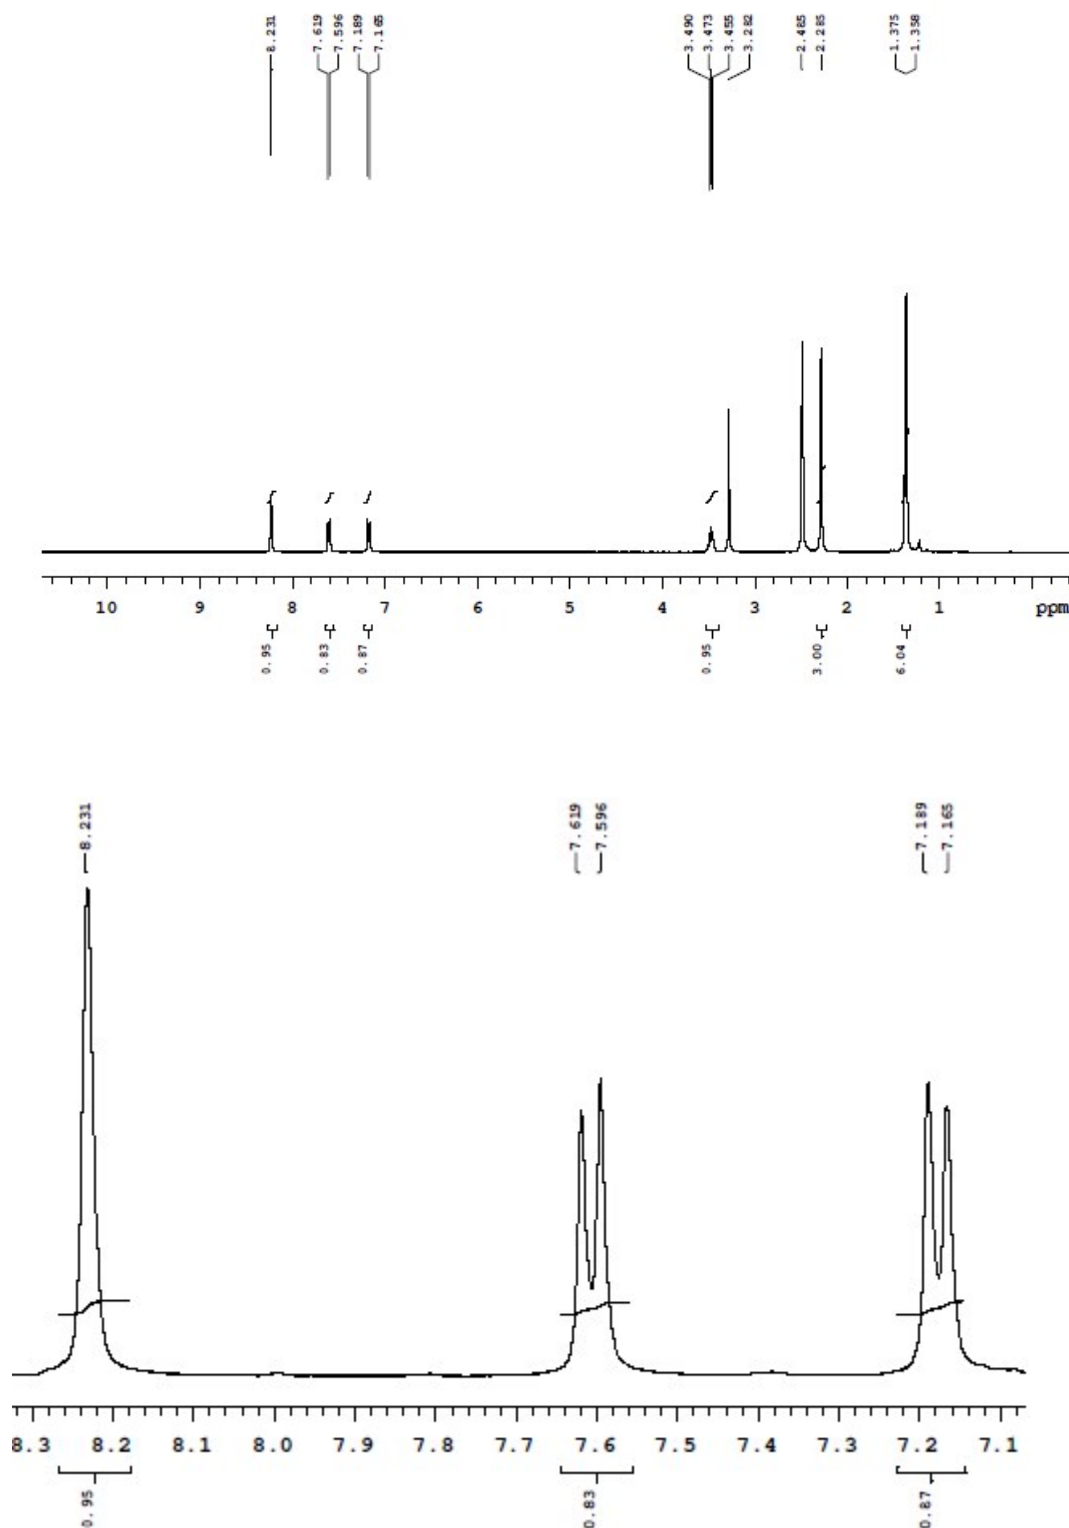

**Figure S83.** <sup>1</sup>H NMR Spectra & its expansion for compound **6p** in DMSO-*d*<sub>6</sub>

NUCLEUS : C13  
 FRQ (MHz) : 100.50  
 AT (sec) : 1.28  
 SW (ppm) : 253.84  
 RD (sec) : 1.00  
 DW (usec) : 5.05  
 Scans : 1000  
 Solvent : DMSO  
 Data Points : 65536  
 LB (Hz) : 5.00  
 TEMP (K) : 303.15  
 EXP : s2pul  
 DATE : Feb 3 2016  
 System : VNMR5\_400

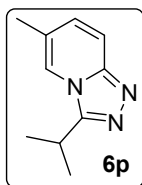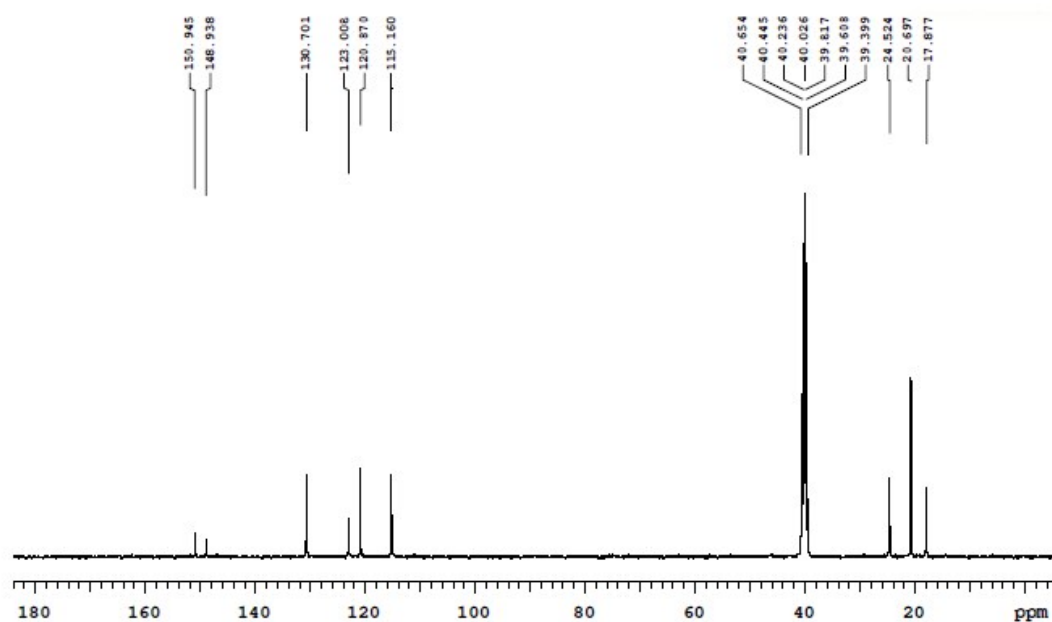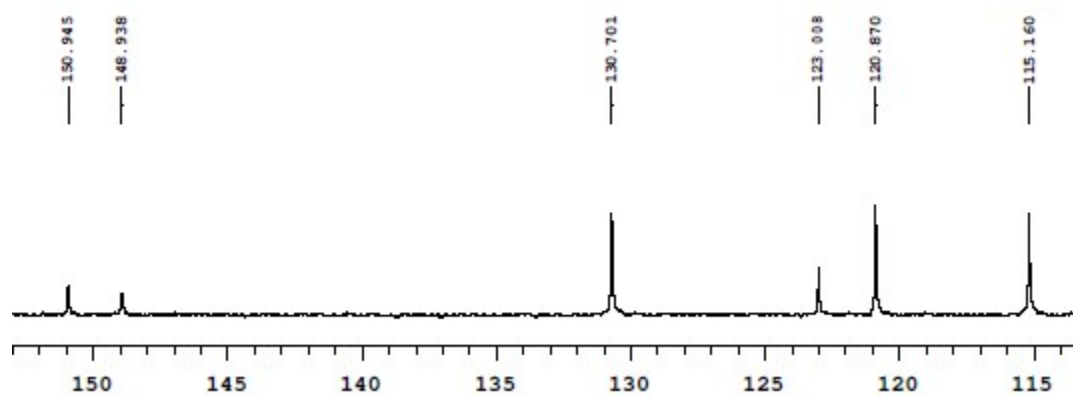

**Figure S84.**  $^{13}\text{C}$  NMR Spectra & its expansion for compound **6p** in  $\text{DMSO-}d_6$

NUCLEUS : H1  
 FRQ (MHz) : 399.64  
 AT (sec) : 2.27  
 SW (ppm) : 18.08  
 RD (sec) : 1.00  
 PW (usec) : 6.40  
 Scans : 32  
 Solvent : dmsd  
 Data Points : 32768  
 LB (Hz) : 2.00  
 TEMP (K) : 303.15  
 EXP : s2pul  
 DATE : Feb 2 2016  
 System : VNMRS\_400

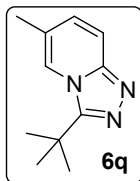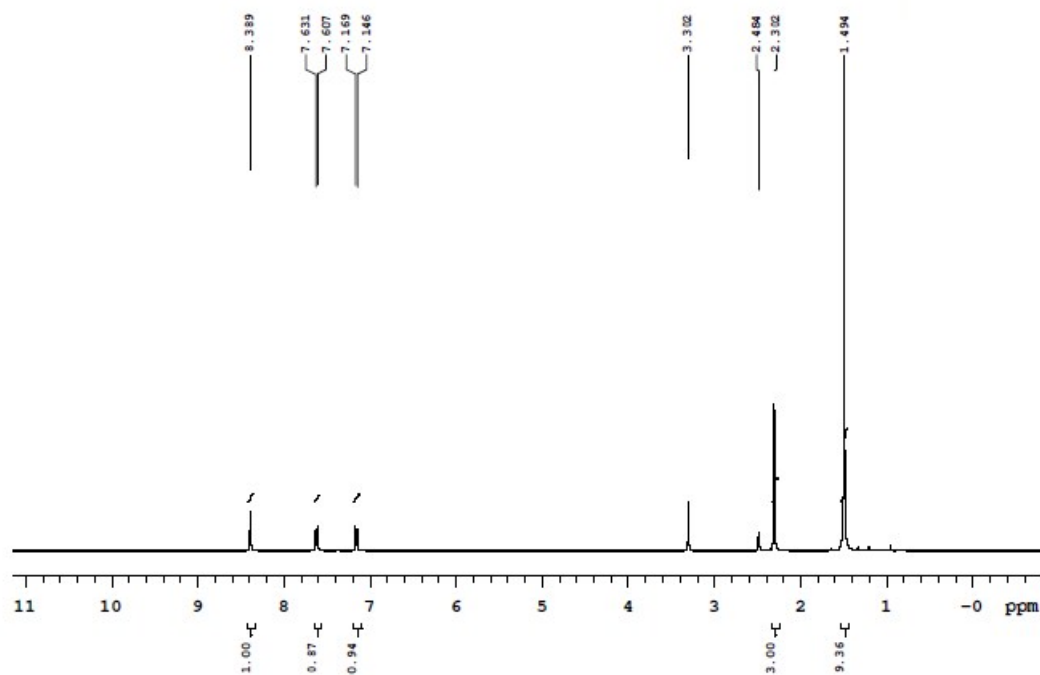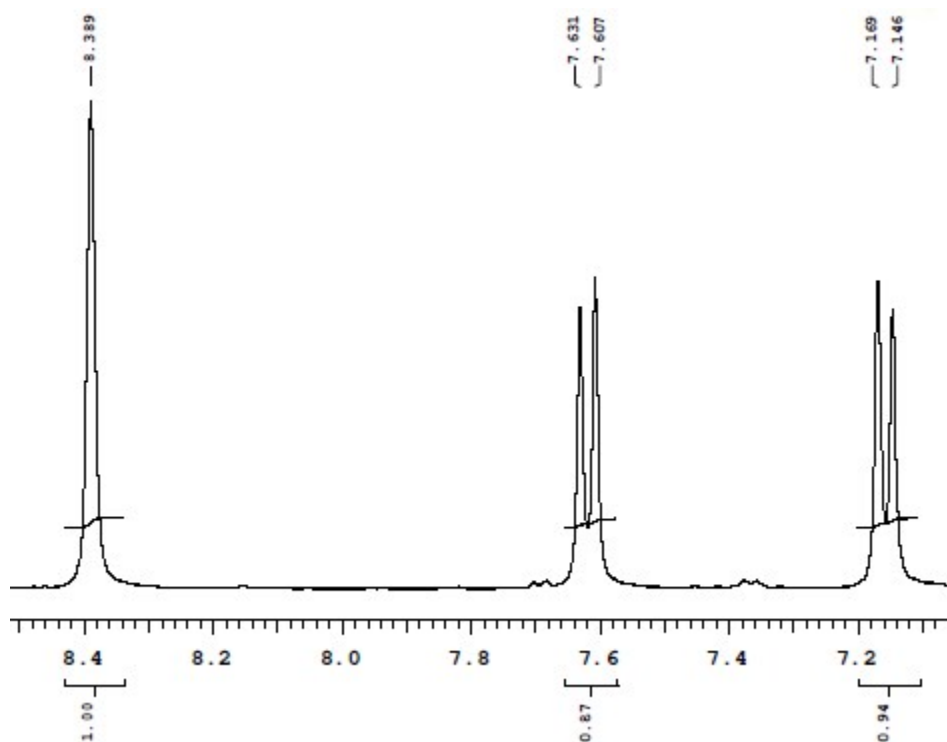

**Figure S85.**  $^1\text{H}$  NMR Spectra & its expansion for compound **6q** in  $\text{DMSO-}d_6$

NUCLEUS : C13  
 FRQ (MHz) : 100.50  
 AT (sec) : 1.28  
 SW (ppm) : 253.84  
 RD (sec) : 1.00  
 PW (usec) : 5.05  
 Scans : 1000  
 Solvent : dmsc  
 Data Points : 65536  
 LB (Hz) : 3.00  
 TEMP (K) : 303.15  
 EXP : s2pul  
 DATE : Feb 2 2016  
 System : VNMR5\_400

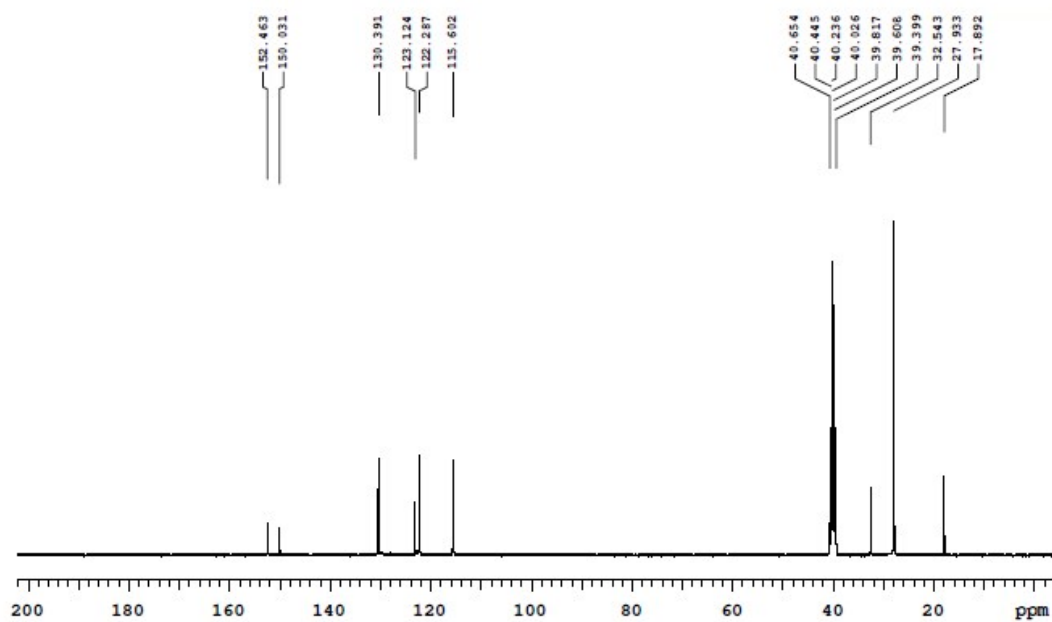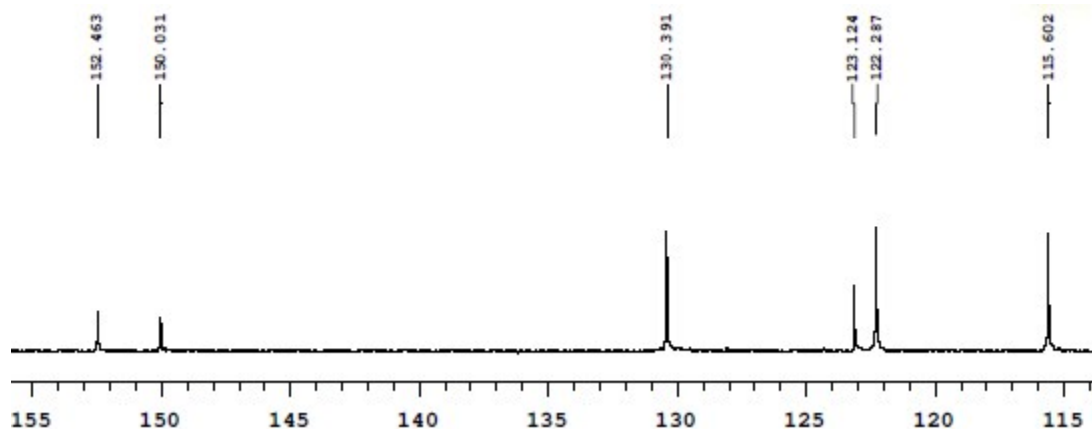

**Figure S86.**  $^{13}\text{C}$  NMR Spectra & its expansion for compound **6q** in  $\text{DMSO-}d_6$

NUCLEUS : H1  
 FRQ (MHz) : 399.64  
 AT (sec) : 2.27  
 SW (ppm) : 18.08  
 RD (sec) : 1.00  
 PW (usec) : 6.60  
 Scans : 64  
 Solvent : dmsd  
 Data Points : 32768  
 LB (Hz) : 1.00  
 TEMP (K) : 303.15  
 EXP : s2pul  
 DATE : Feb 1 2016  
 System : VNMR-400

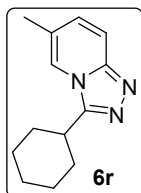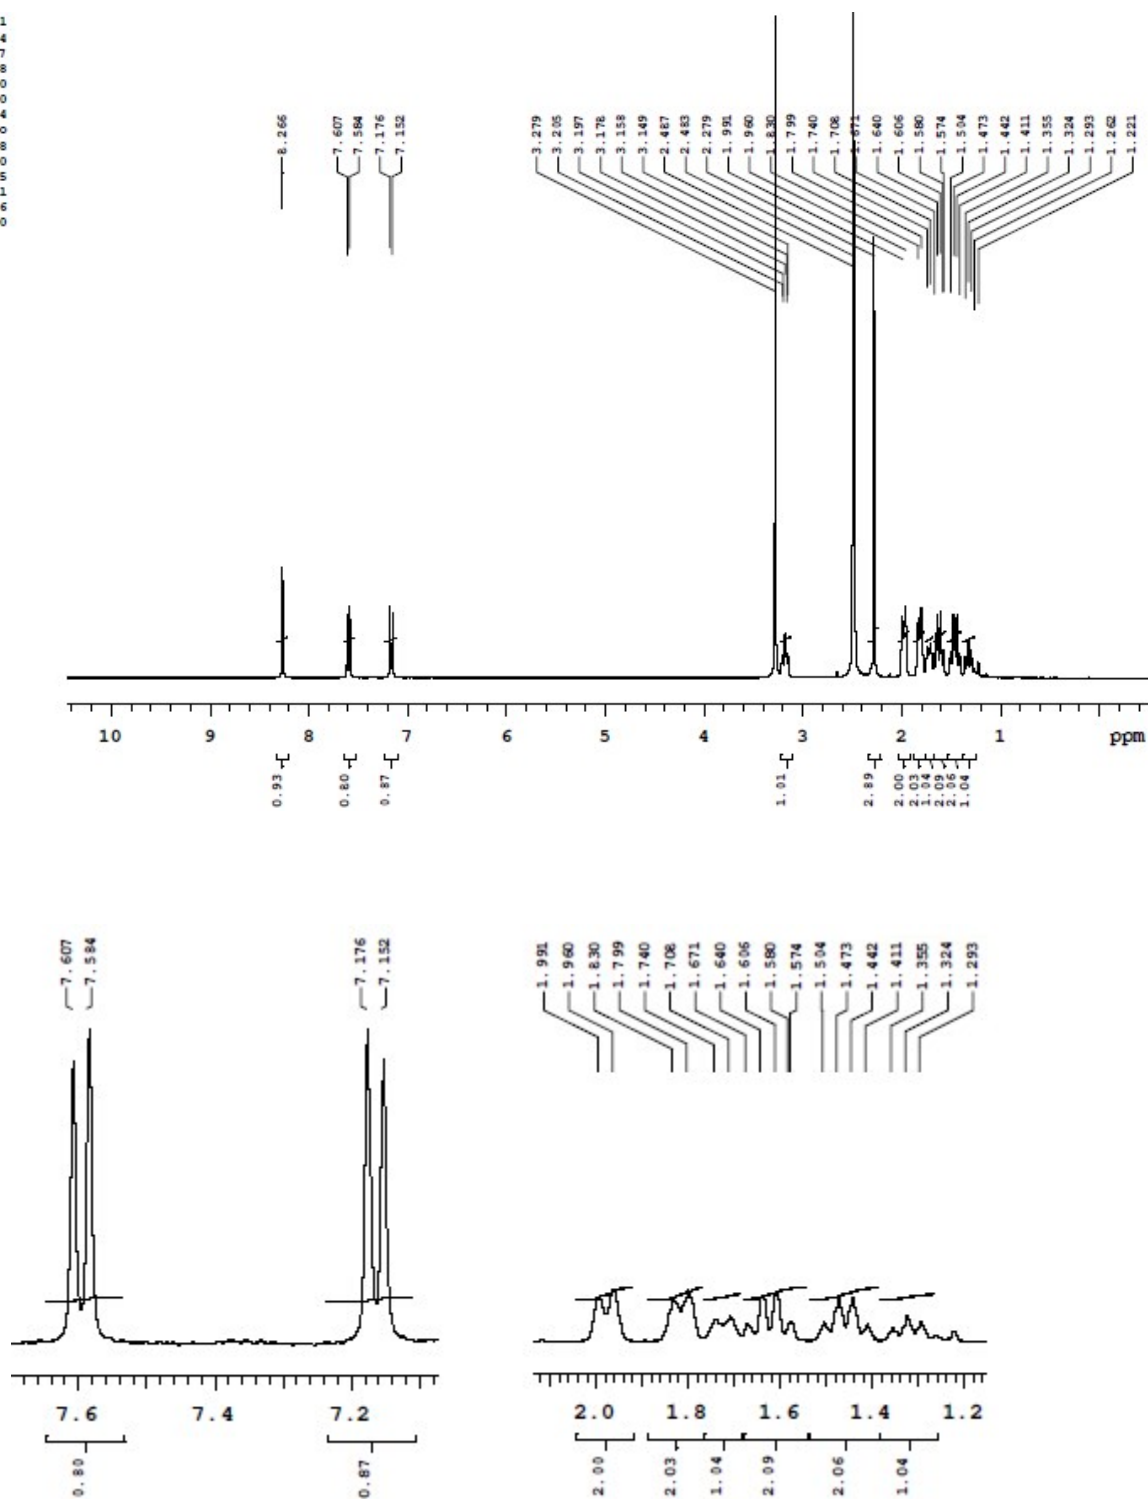

**Figure S87.**  $^1\text{H}$  NMR Spectra & its expansion for compound **6r** in  $\text{DMSO-}d_6$

NUCLEUS : C13  
 FRQ (MHz) : 100.50  
 AT (sec) : 1.28  
 SW (ppm) : 253.84  
 RD (sec) : 1.00  
 PW (usec) : 5.05  
 Scans : 1000  
 Solvent : dmsc  
 Data Points : 65536  
 LB (Hz) : 5.00  
 TEMP (K) : 303.15  
 EXP : s2pul  
 DATE : Feb 3 2016  
 System : VNMR5\_400

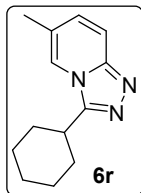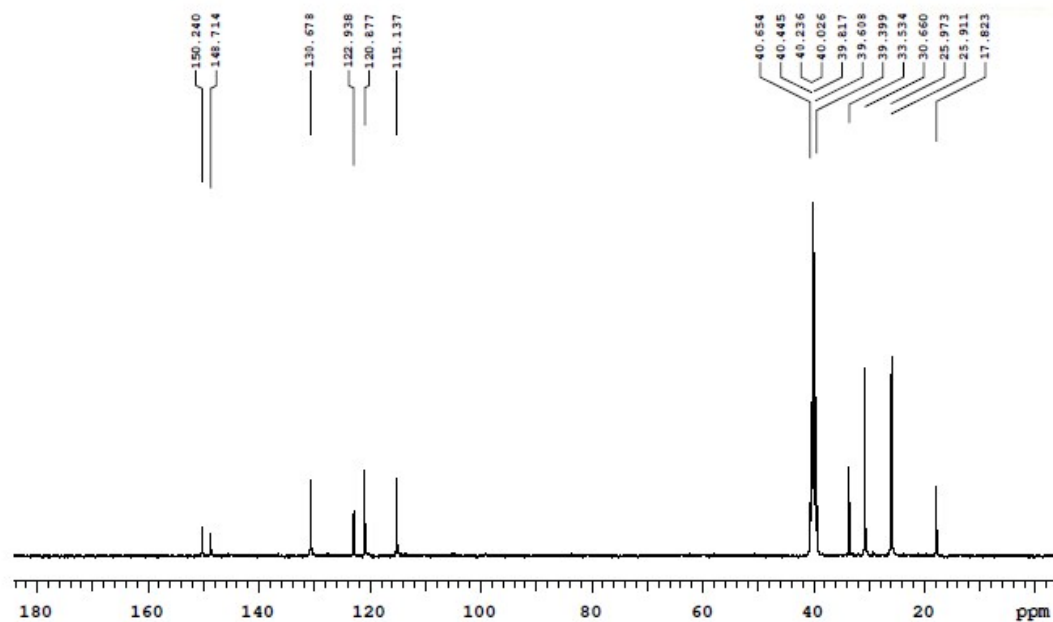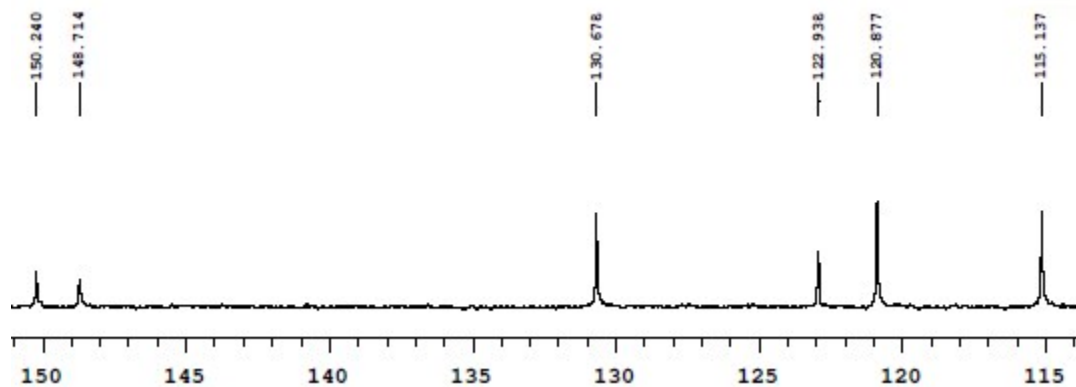

**Figure S88.**  $^{13}\text{C}$  NMR Spectra & its expansion for compound **6r** in  $\text{DMSO}-d_6$

NUCLEUS : R1  
 FREQ (MHz) : 399.64  
 AT (sec) : 2.27  
 SW (ppm) : 18.08  
 RD (sec) : 1.00  
 PW (usec) : 6.60  
 Scans : 64  
 Solvent : dmsc  
 Data Points : 32768  
 LB (Hz) : 1.00  
 TEMP (K) : 303.15  
 END : a2pol  
 DATE : Feb 18 2016  
 System : VNMR-400

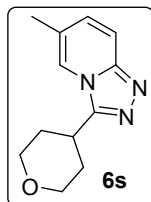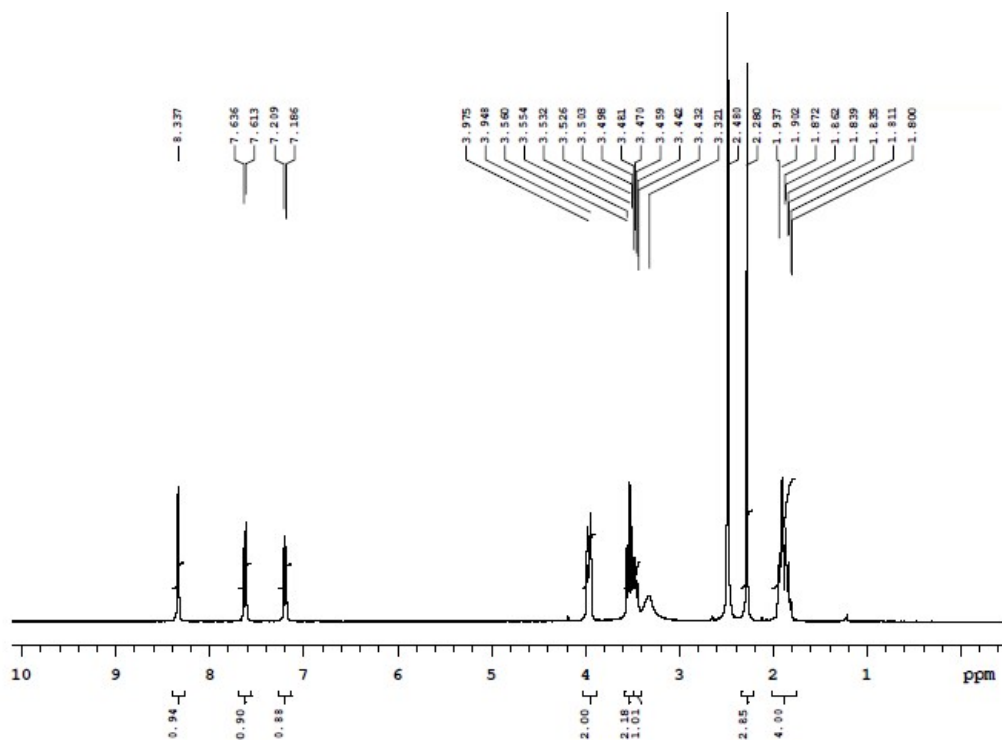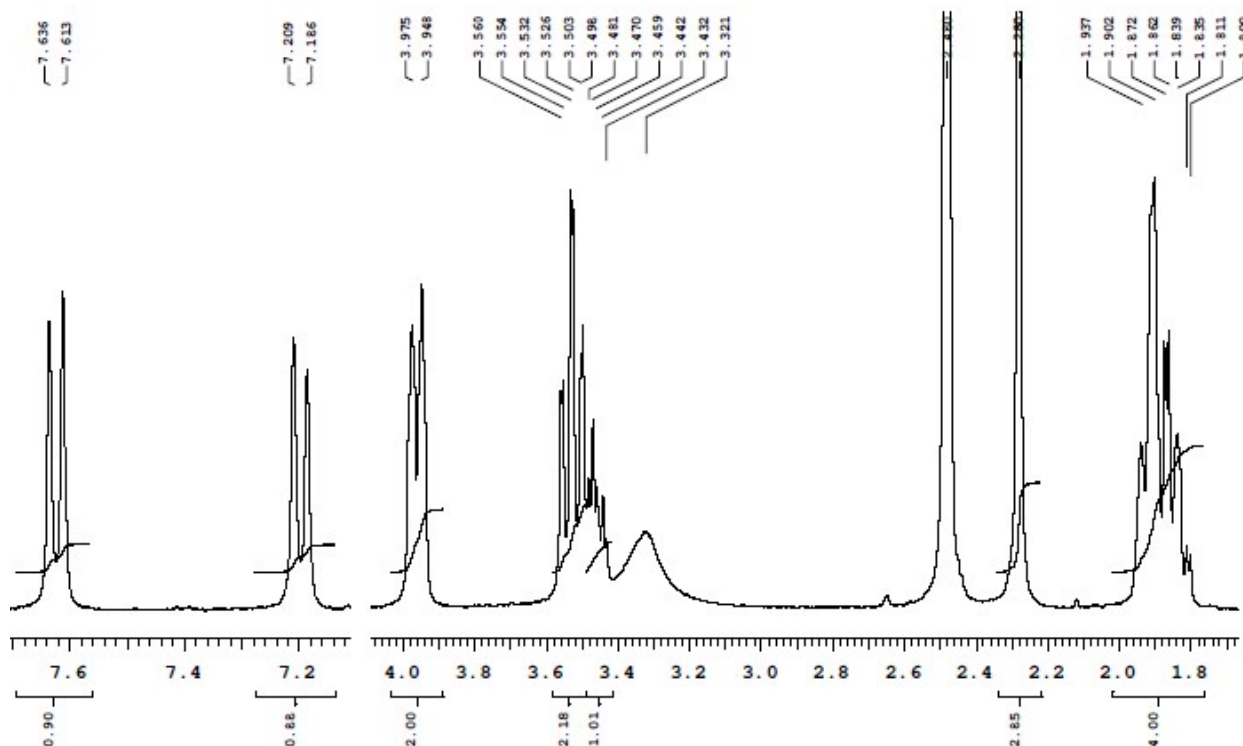

**Figure S89.**  $^1\text{H}$  NMR Spectra & its expansion for compound **6s** in  $\text{DMSO-}d_6$

NUCLEUS : C13  
 FREQ (MHz) : 100.50  
 AT (sec) : 1.28  
 SW (ppm) : 253.84  
 RD (sec) : 1.00  
 PW (usec) : 5.05  
 Scans : 2000  
 Solvent : dmsd  
 Data Points : 65536  
 LB (Hz) : 5.00  
 TEMP (K) : 303.15  
 EXP : s2pol1  
 DATE : Feb 19 2016  
 System : VNMR5\_400

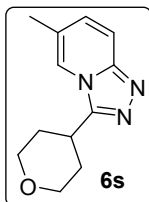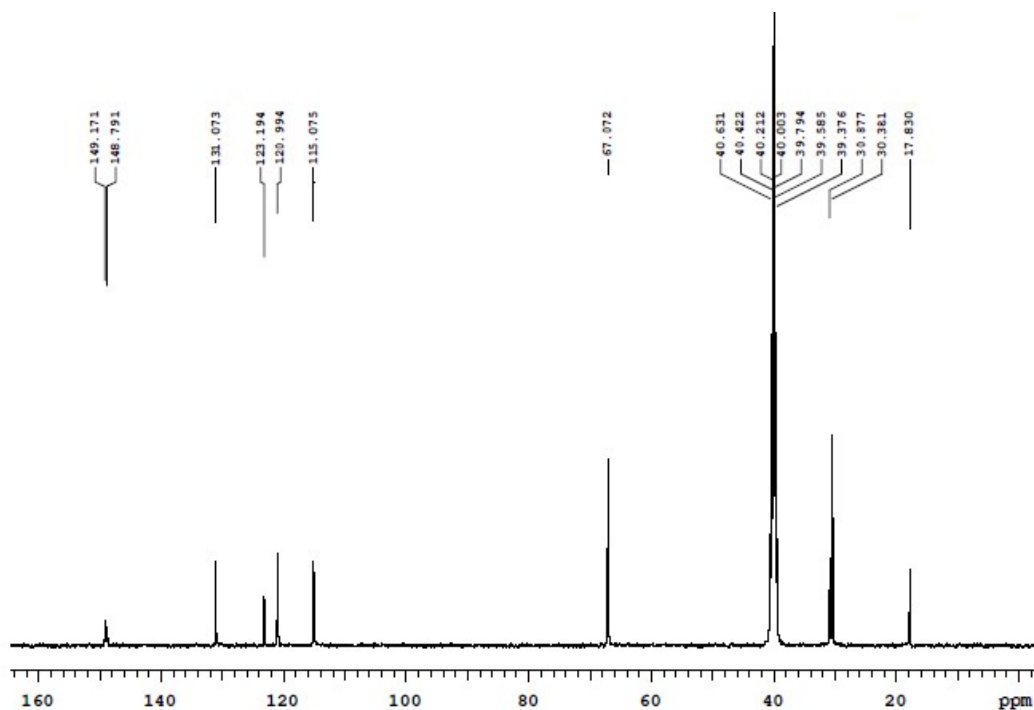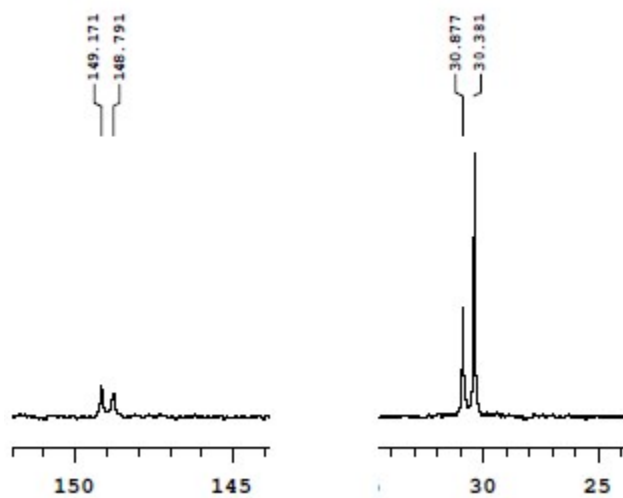

**Figure S90.**  $^{13}\text{C}$  NMR Spectra & its expansion for compound **6s** in  $\text{DMSO-}d_6$

NUCLEUS : H1  
 FREQ (MHz) : 399.64  
 AT (sec) : 2.27  
 SW (ppm) : 18.08  
 RD (sec) : 1.00  
 PW (usec) : 6.60  
 Scans : 64  
 Solvent : dms0  
 Data Points : 32768  
 LB (Hz) : 1.00  
 TEMP (K) : 303.15  
 EXP : s2pu1  
 DATE : Feb 17 2016  
 System : VNMR5\_400

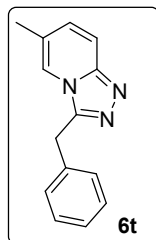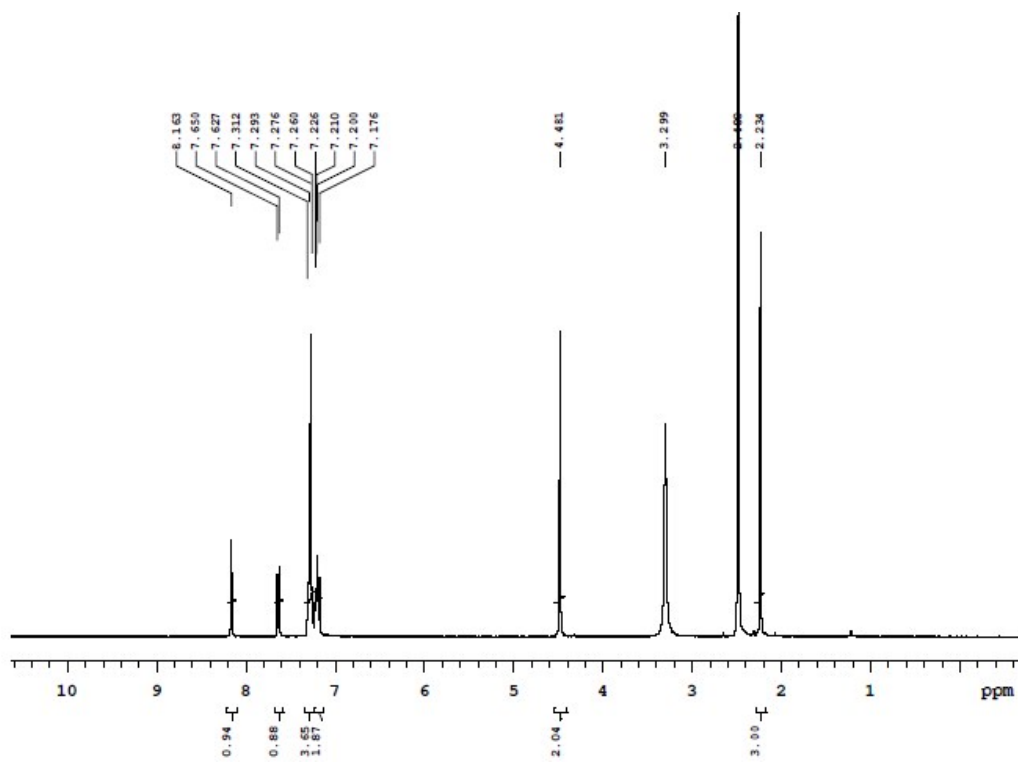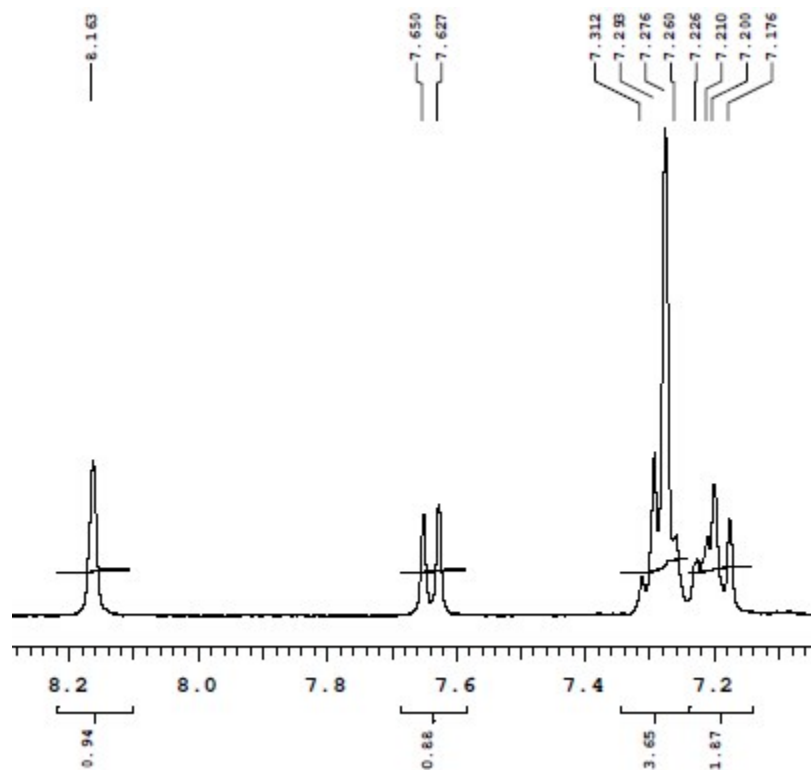

**Figure S91.**  $^1\text{H}$  NMR Spectra & its expansion for compound **6t** in  $\text{DMSO-}d_6$

NUCLEUS : C13  
 FREQ (MHz) : 100.50  
 AT (sec) : 1.28  
 SW (ppm) : 253.84  
 RD (sec) : 1.00  
 PW (usec) : 5.05  
 Scans : 2400  
 Solvent : dmsd  
 Data Points : 65536  
 LB (Hz) : 5.00  
 TEMP (K) : 303.15  
 EXP : s2pul  
 DATE : Feb 17 2016  
 System : VNMR5\_400

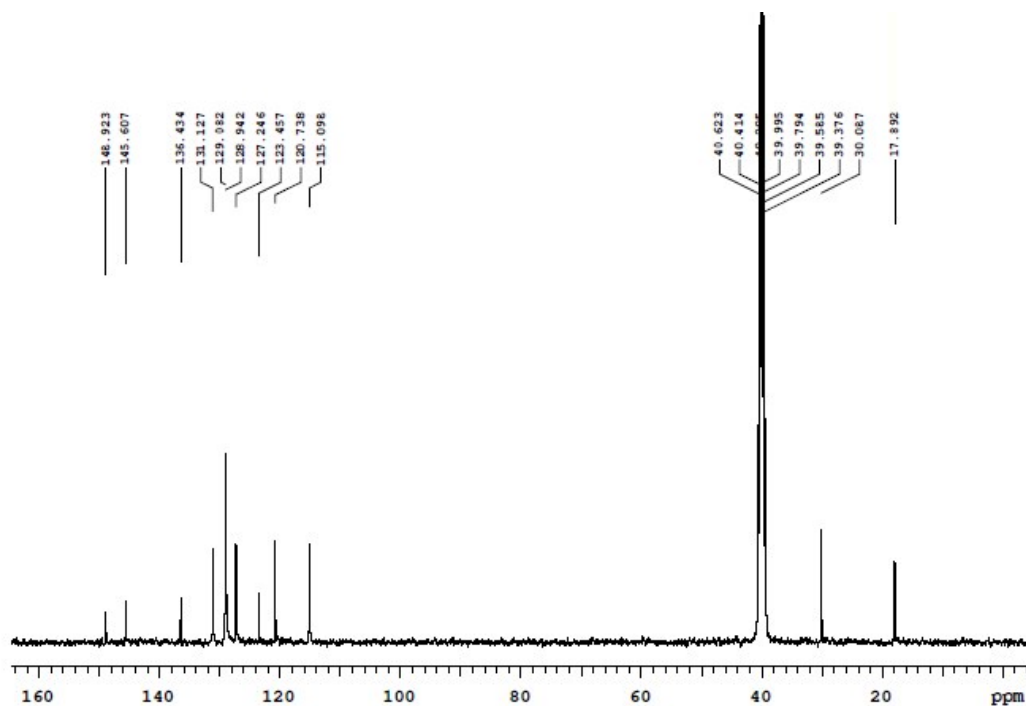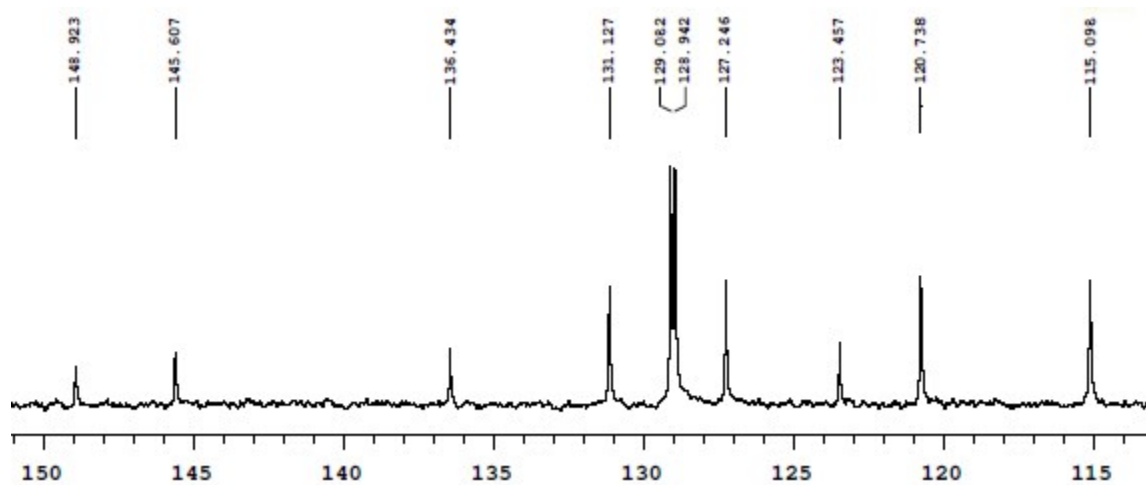

**Figure S92.**  $^{13}\text{C}$  NMR Spectra & its expansion for compound **6t** in  $\text{DMSO-}d_6$

NUCLEUS : H1  
 FREQ (MHz) : 399.64  
 AT (sec) : 2.27  
 SW (ppm) : 18.08  
 RD (sec) : 1.00  
 PW (usec) : 6.40  
 Scans : 32  
 Solvent : dms-d6  
 Data Points : 32768  
 LB (Hz) : 2.00  
 TEMP (K) : 303.15  
 EXP : s2pu1  
 DATE : Feb 3 2016  
 System : VNMRS-400

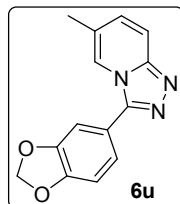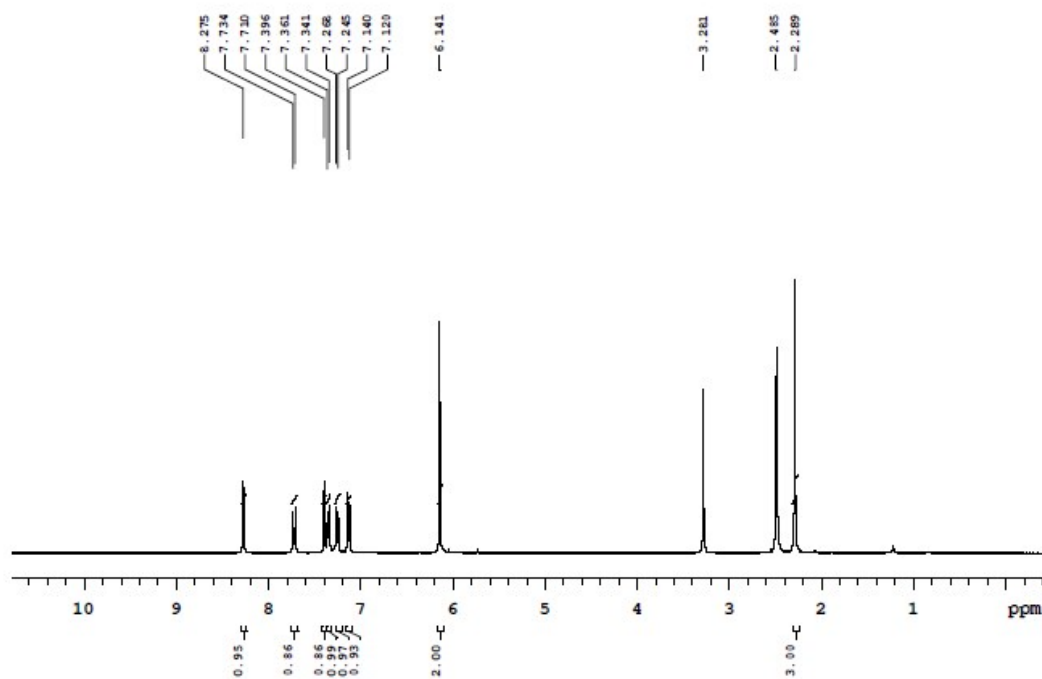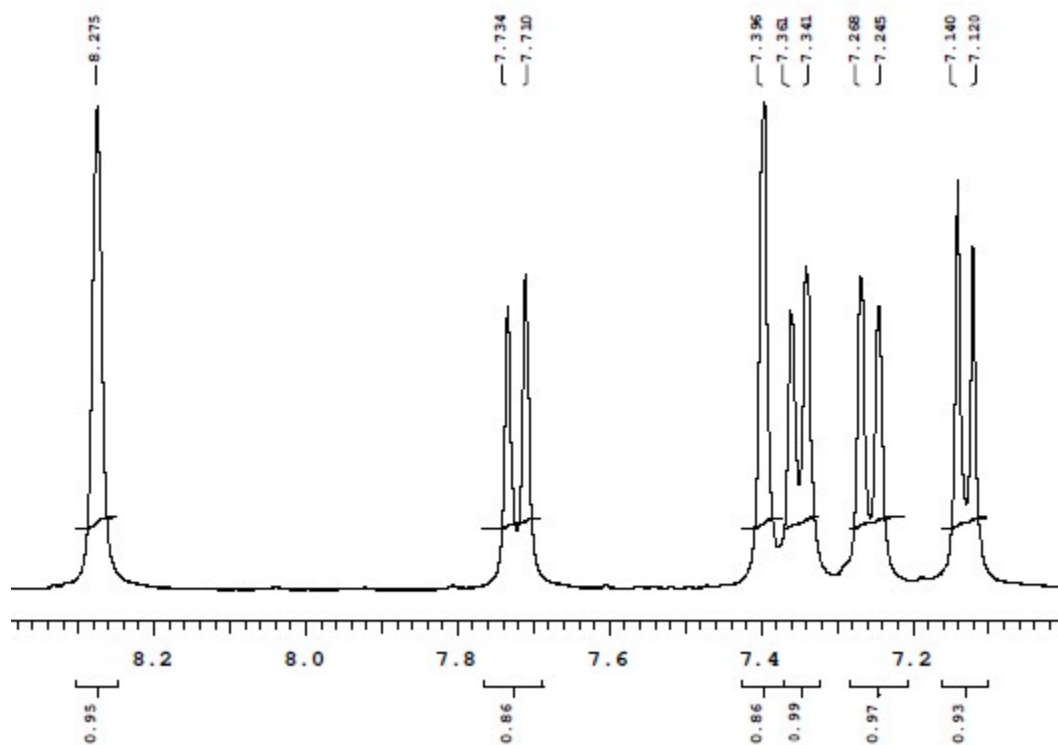

**Figure S93.**  $^1\text{H}$  NMR Spectra & its expansion for compound **6u** in  $\text{DMSO-}d_6$

NUCLEUS : C13  
 FREQ (MHz) : 100.50  
 AT (sec) : 1.28  
 SW (ppm) : 253.84  
 RD (sec) : 1.00  
 PW (usec) : 5.05  
 Scans : 1000  
 Solvent : DMSO  
 Data Points : 65536  
 LB (Hz) : 5.00  
 TEMP (K) : 303.15  
 EXP : zgpg30  
 DATE : Feb 9 2016  
 System : VNMRS\_400

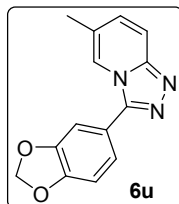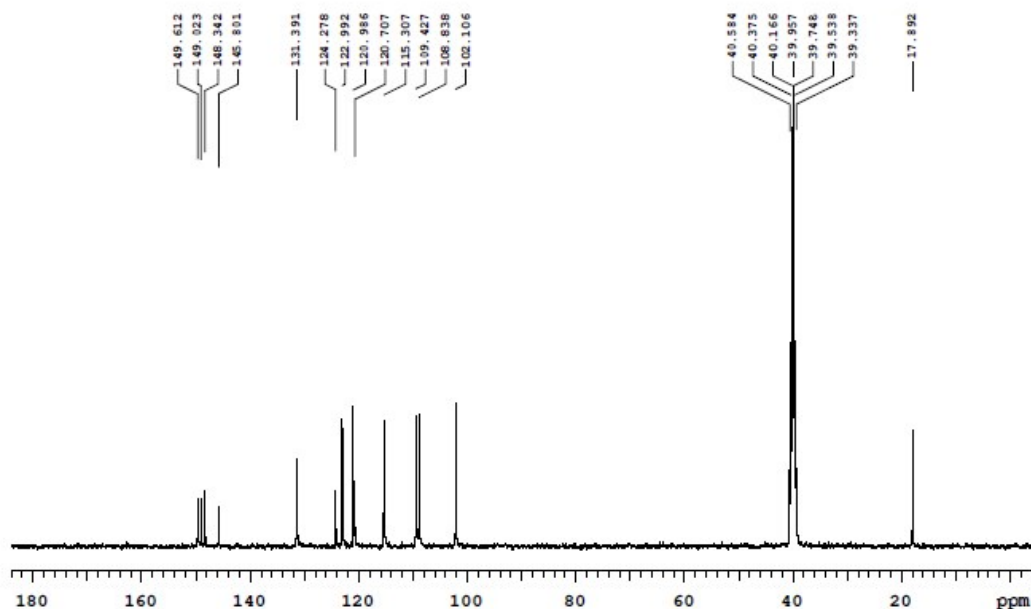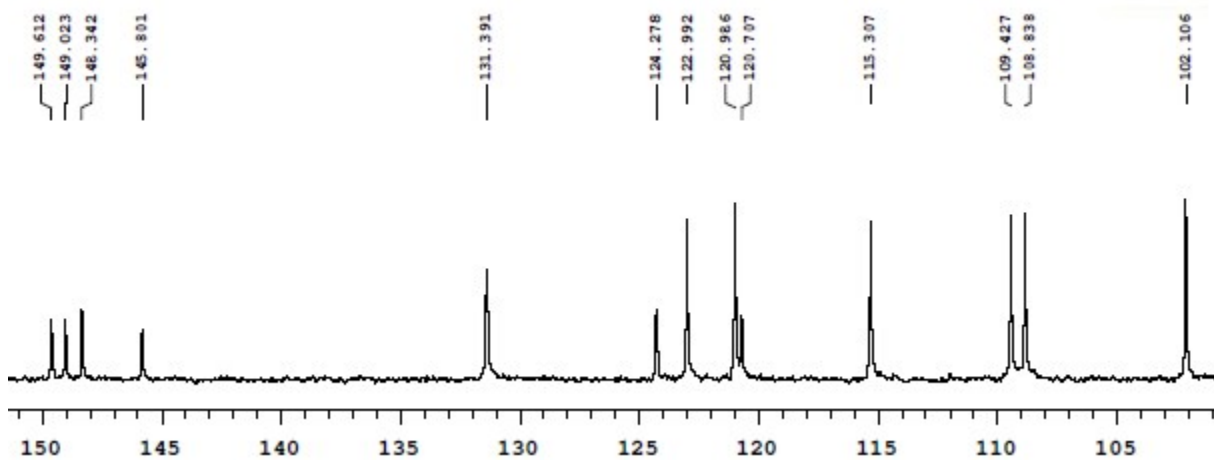

**Figure S94.**  $^{13}\text{C}$  NMR Spectra & its expansion for compound **6u** in  $\text{DMSO-}d_6$

NUCLEUS : R1  
 FREQ (MHz) : 399.63  
 AT (sec) : 2.27  
 SW (ppm) : 18.08  
 RD (sec) : 1.00  
 FID (usec) : 6.40  
 Scans : 64  
 Solvent : cdcl3  
 Data Points : 32768  
 LB (Hz) : 2.00  
 TEMP (K) : 303.15  
 EXP : s2pul  
 DATE : May 16 2016  
 System : VNMR5\_400

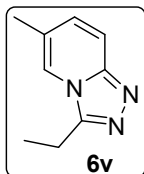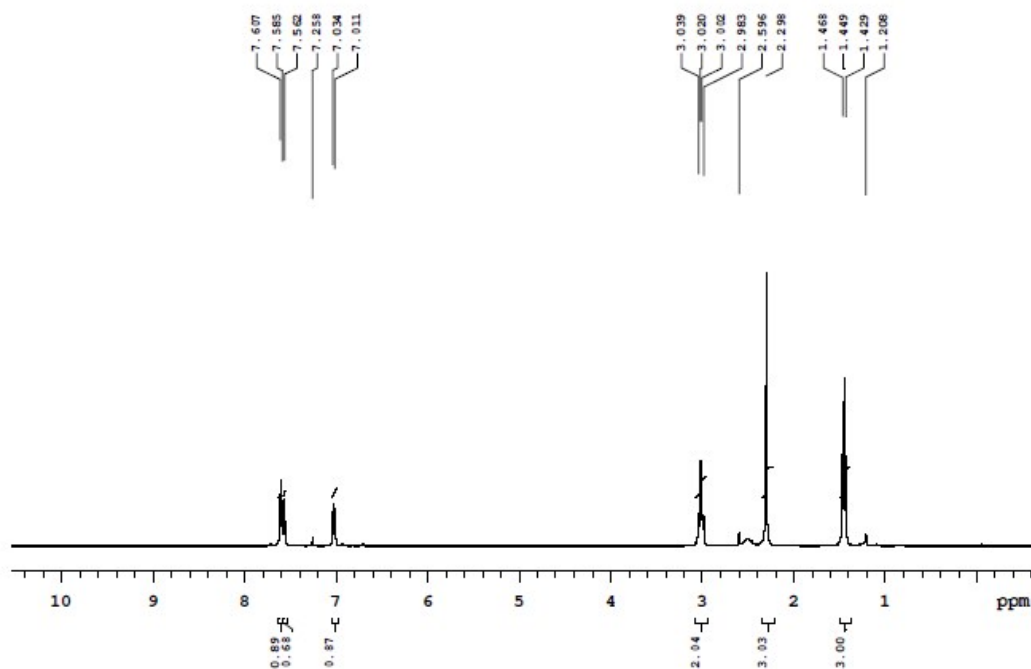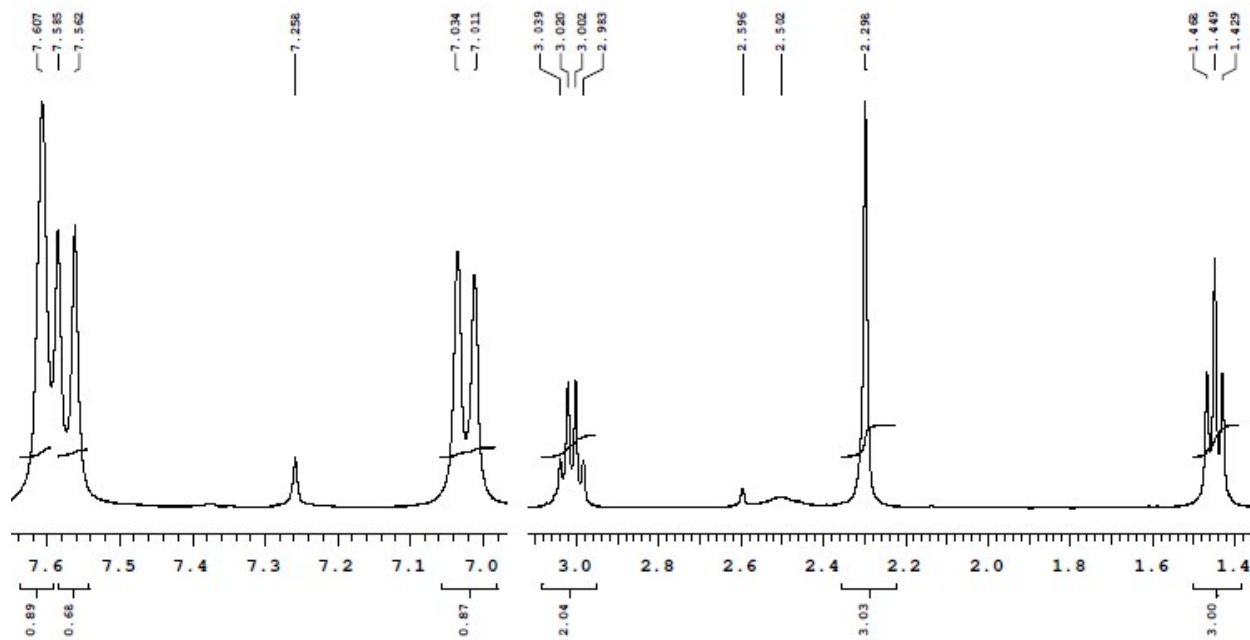

**Figure S95.**  $^1\text{H}$  NMR Spectra & its expansion for compound **6v** in  $\text{CDCl}_3$

NUCLEUS : C13  
 FREQ (MHz) : 100.50  
 AT (sec) : 1.28  
 SW (ppm) : 253.84  
 RD (sec) : 1.00  
 PW (usec) : 5.05  
 Scans : 3000  
 Solvent : cdd13  
 Data Points : 65936  
 LB (Hz) : 4.00  
 TEMP (K) : 303.15  
 EXP : s2pu1  
 DATE : May 16 2016  
 System : VNMR5\_400

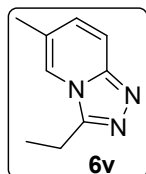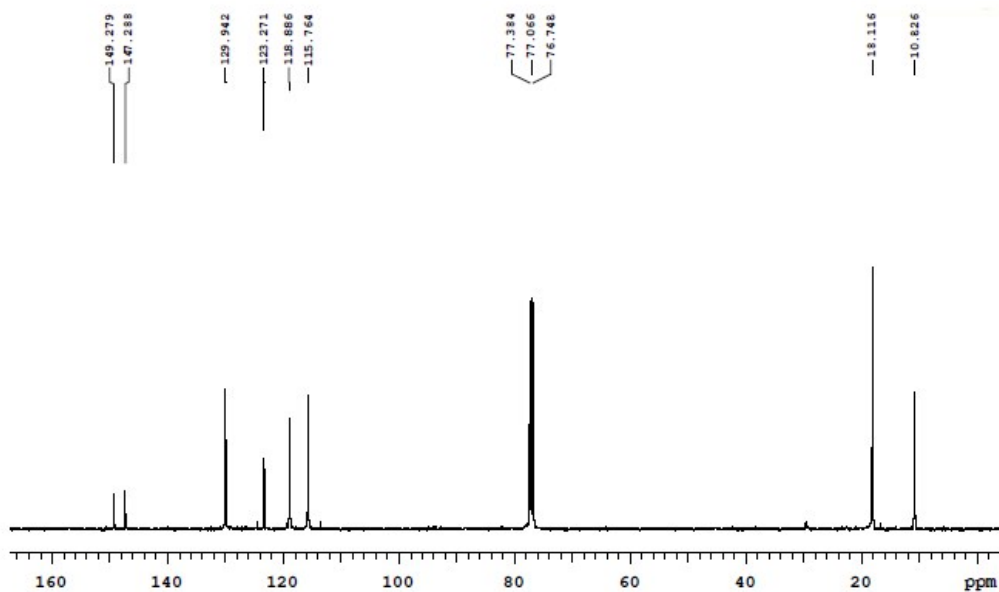

**Figure S96.**  $^{13}\text{C}$  NMR Spectra for compound **6v** in  $\text{CDCl}_3$

NUCLEUS : H1  
 FRQ (MHz) : 399.63  
 AT (sec) : 2.27  
 SW (ppm) : 18.08  
 RD (sec) : 1.00  
 DW (usec) : 6.40  
 Scans : 64  
 Solvent : cdcl3  
 Data Points : 32768  
 LB (Hz) : 2.00  
 TEMP (K) : 303.15  
 EXP : s2pul  
 DATE : May 16 2016  
 System : VNMR5\_400

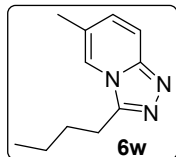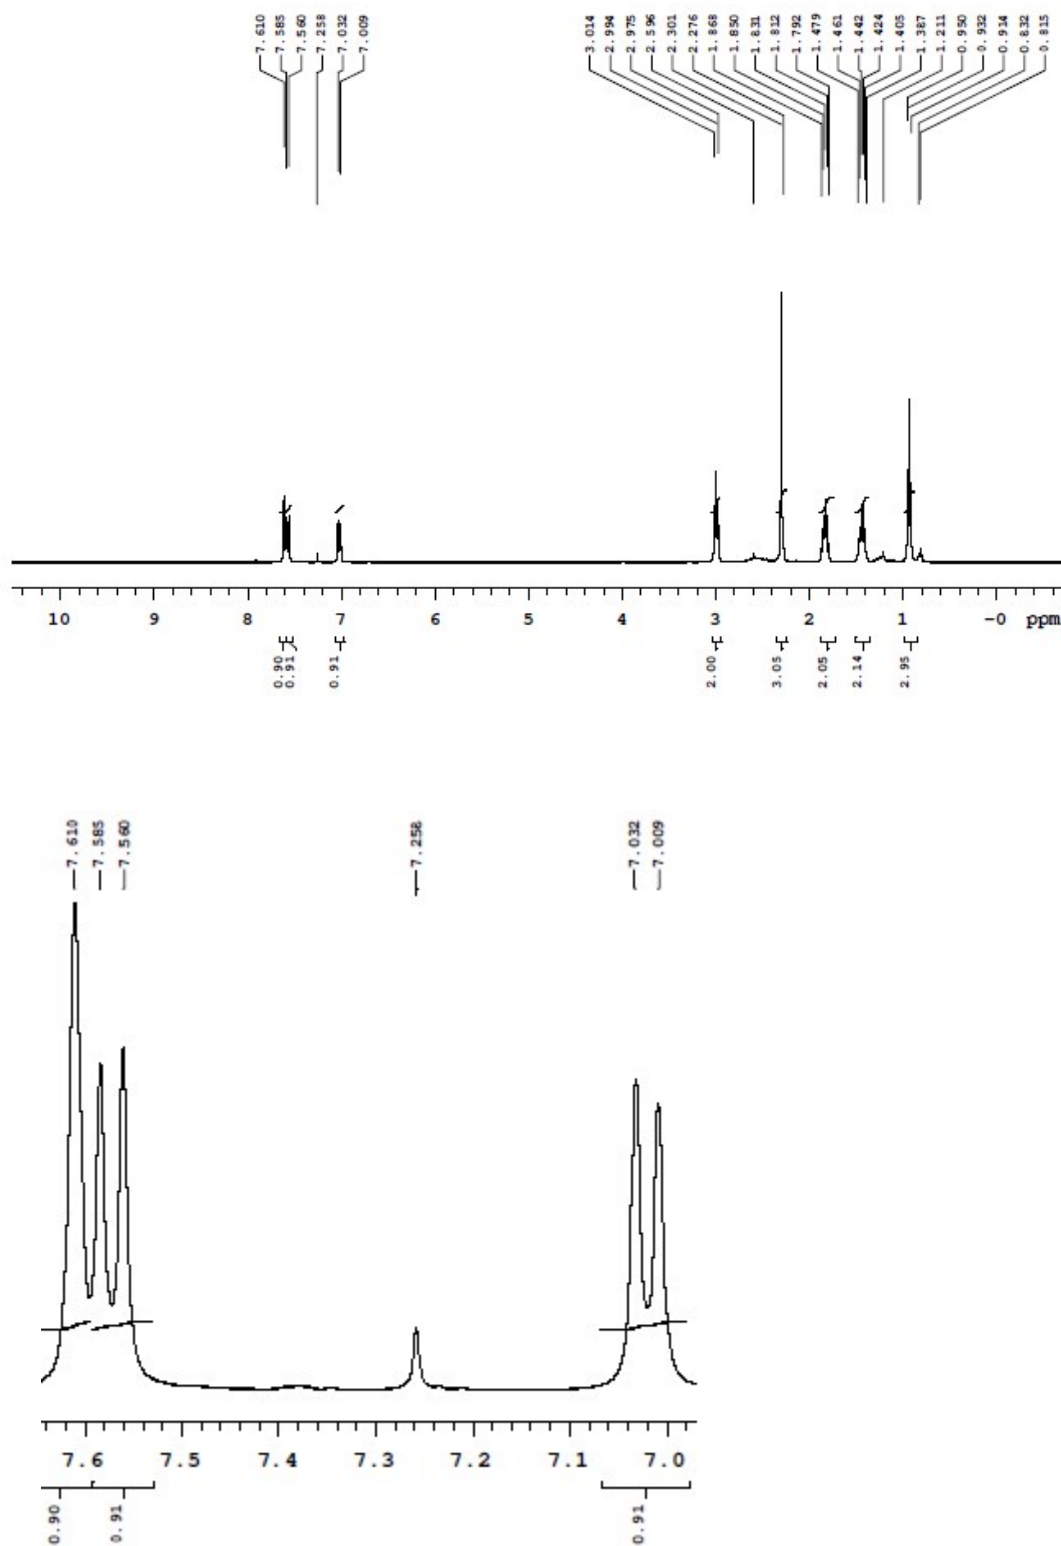

**Figure S97.** <sup>1</sup>H NMR Spectra & its expansion for compound **6w** in CDCl<sub>3</sub>

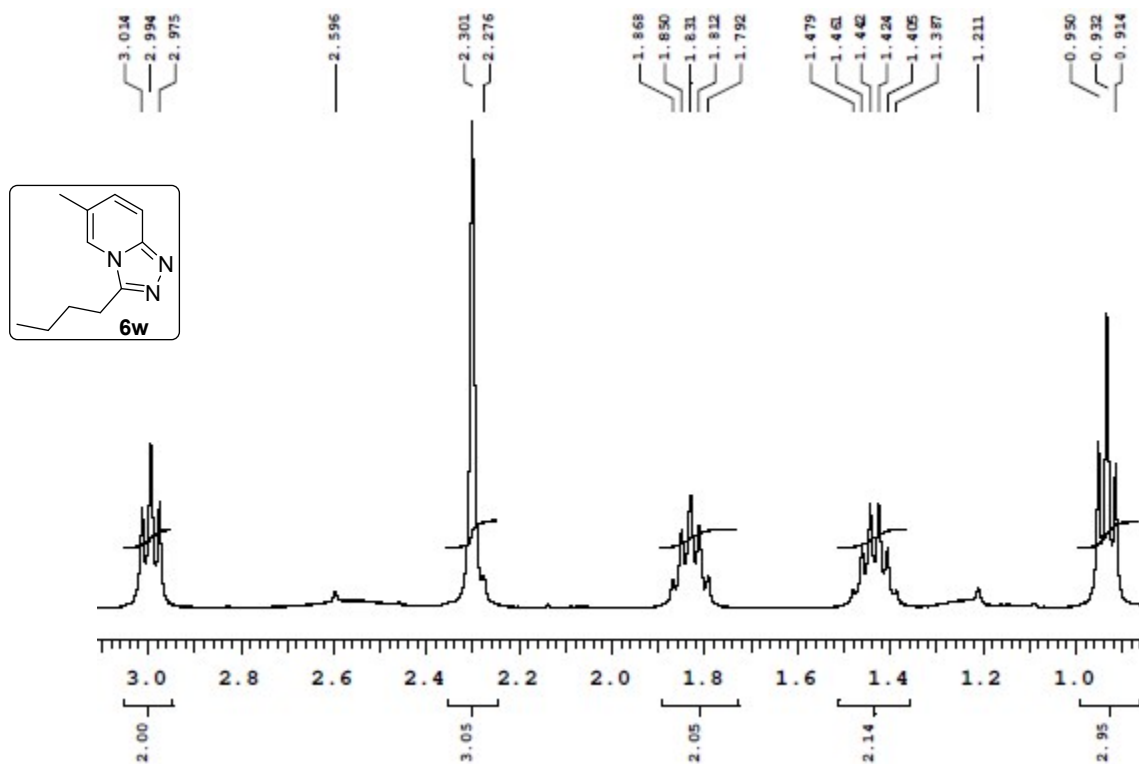

Figure S98. <sup>1</sup>H NMR Spectra expansion for compound **6w** in CDCl<sub>3</sub>

NUCLEUS : C13  
 FREQ (MHz) : 100.50  
 AT (sec) : 1.28  
 SW (ppm) : 253.84  
 RD (sec) : 1.00  
 PW (usec) : 5.05  
 Scans : 3000  
 Solvent : cdcl3  
 Data Points : 65536  
 LB (Hz) : 4.00  
 TEMP (K) : 303.15  
 EXP : s2pul  
 DATE : May 16 2016  
 System : VNMRJ\_400

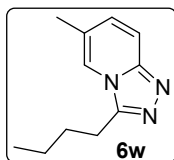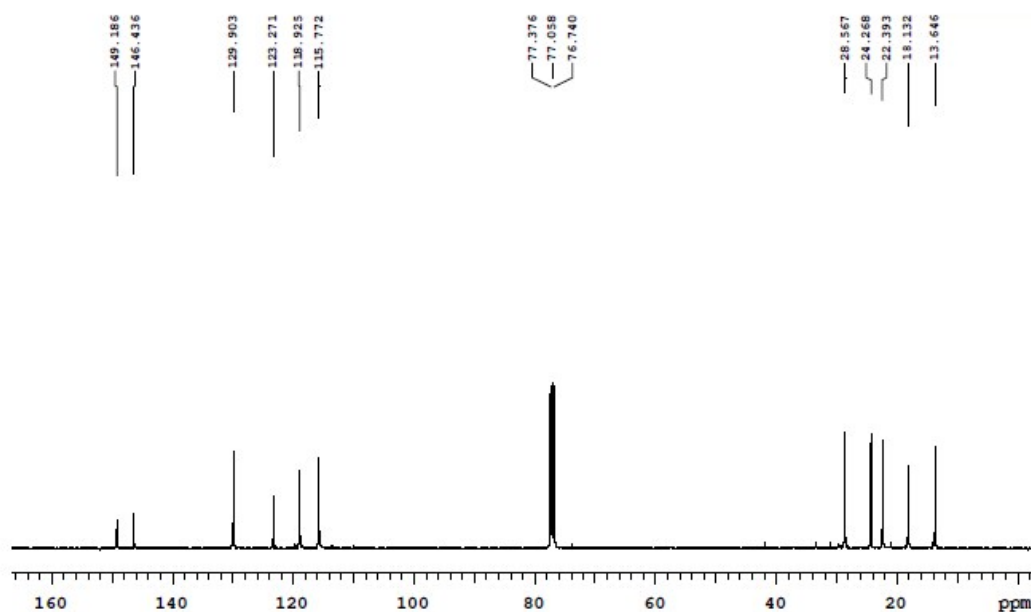

Figure S99. <sup>13</sup>C NMR Spectra for compound **6w** in CDCl<sub>3</sub>

NUCLEUS : H1  
 FREQ (MHz) : 399.63  
 AT (sec) : 2.27  
 SW (ppm) : 18.08  
 RD (sec) : 1.00  
 DW (usec) : 6.40  
 Scans : 64  
 Solvent : cdcl3  
 Data Points : 32768  
 LB (Hz) : 2.00  
 TEMP (K) : 303.15  
 EXP : s2pul  
 DATE : May 12 2016  
 System : VNMRB\_400

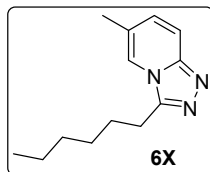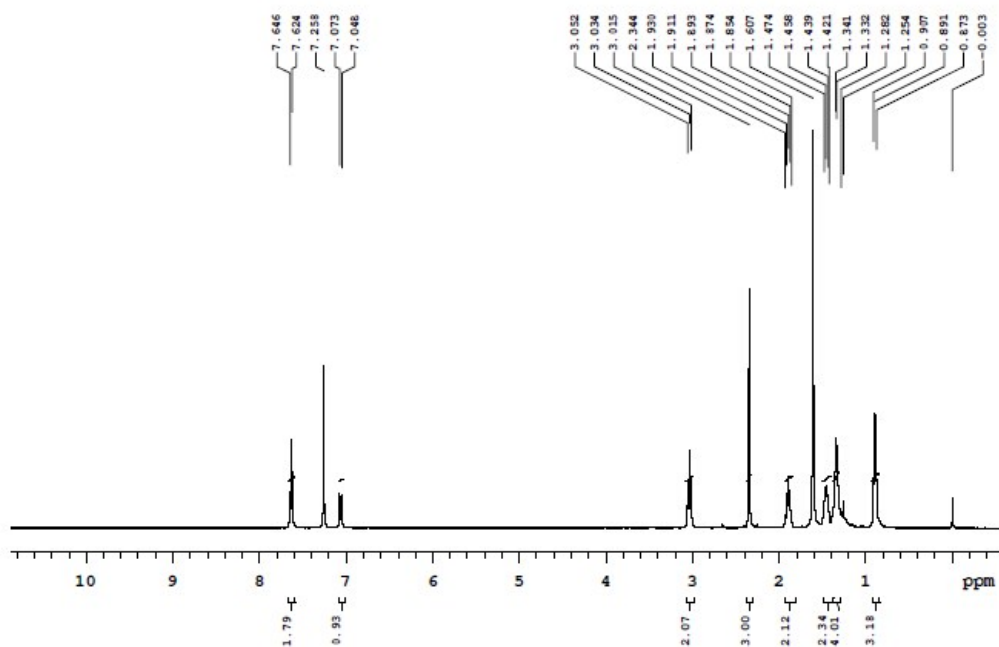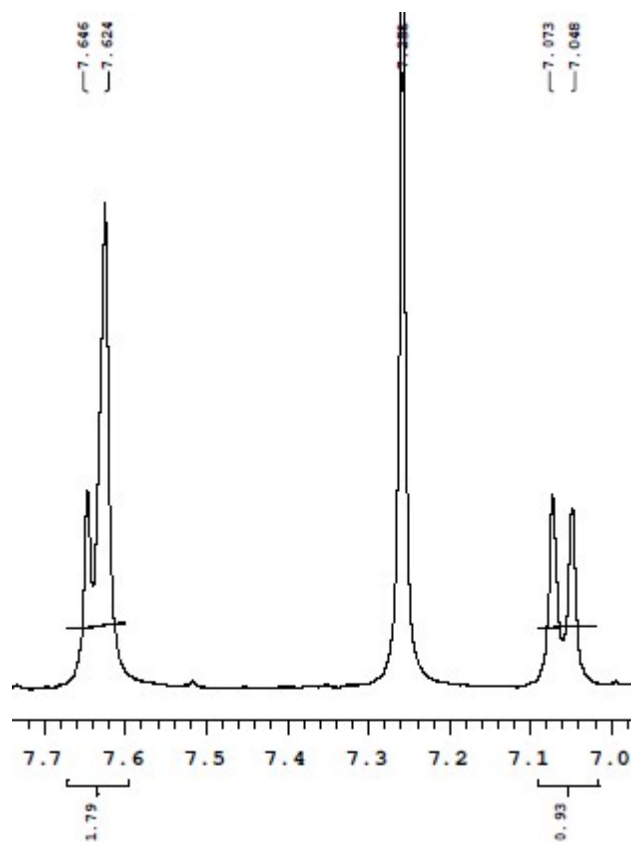

**Figure S100.**  $^1\text{H}$  NMR Spectra & its expansion for compound **6x** in  $\text{CDCl}_3$

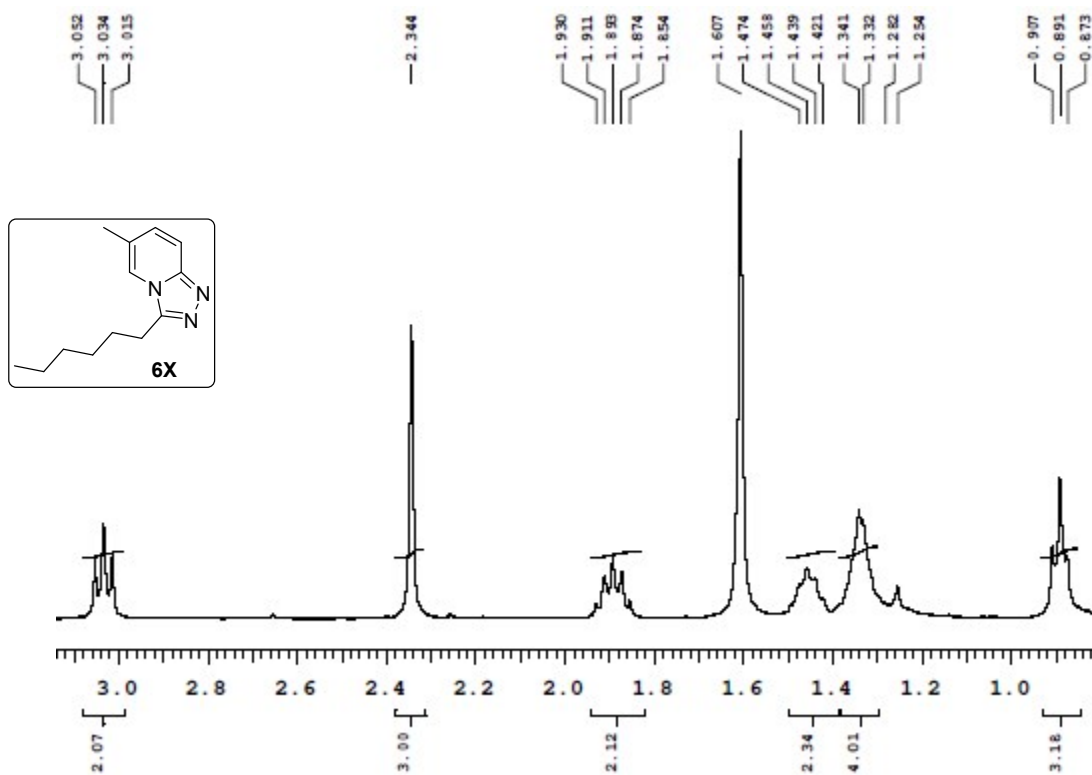

**Figure S101.** <sup>1</sup>H NMR Spectra expansion for compound **6x** in CDCl<sub>3</sub>

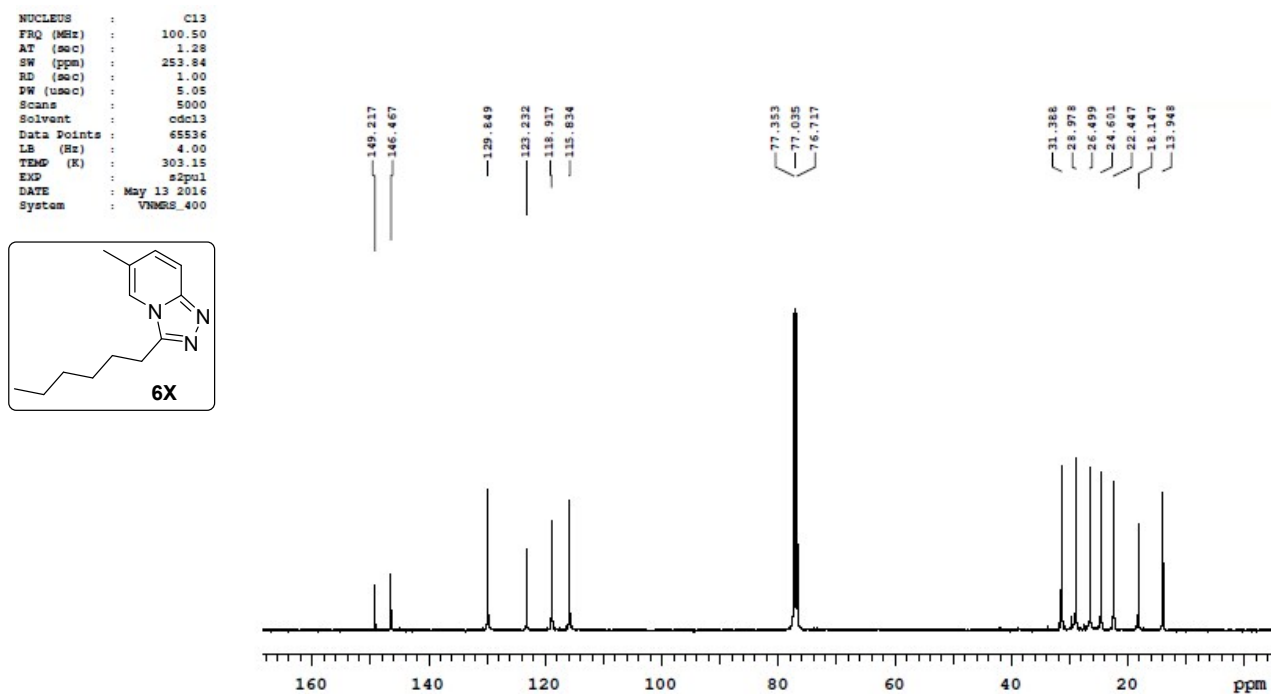

**Figure S102.** <sup>13</sup>C NMR Spectra for compound **6x** in CDCl<sub>3</sub>

NUCLEUS : H1  
 FRQ (MHz) : 399.64  
 AT (sec) : 2.27  
 SW (ppm) : 18.08  
 RD (sec) : 1.00  
 PW (usec) : 6.60  
 Scans : 64  
 Solvent : dmsc  
 Data Points : 32768  
 LB (Hz) : 1.00  
 TEMP (K) : 303.15  
 EXP : s2pul  
 DATE : Jan 5 2016  
 System : VNMR5\_400

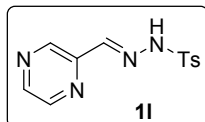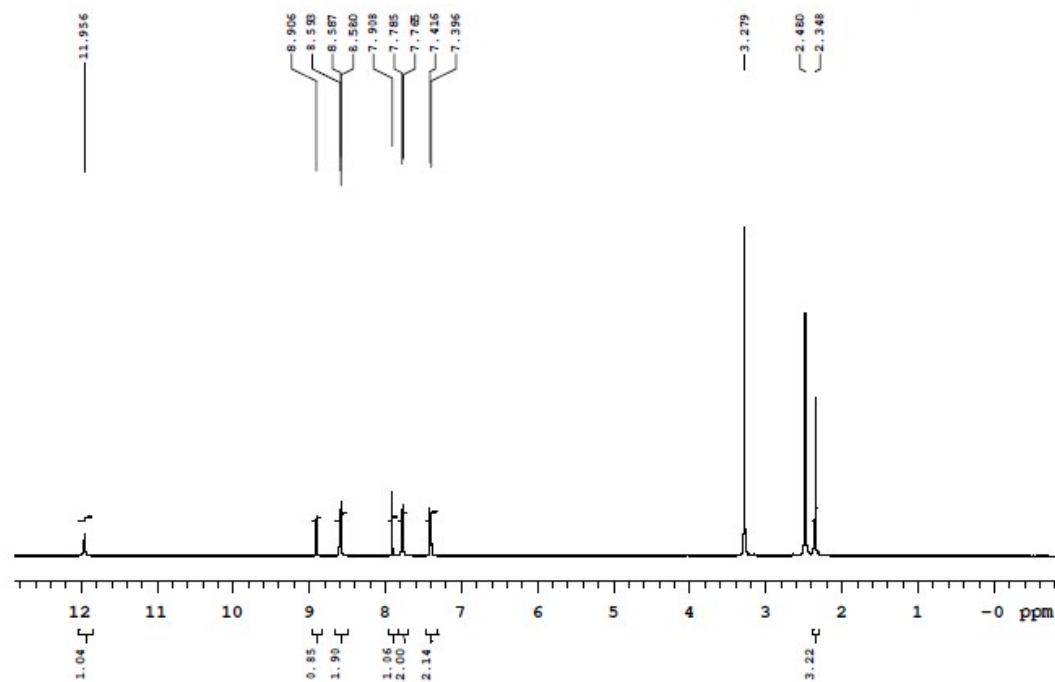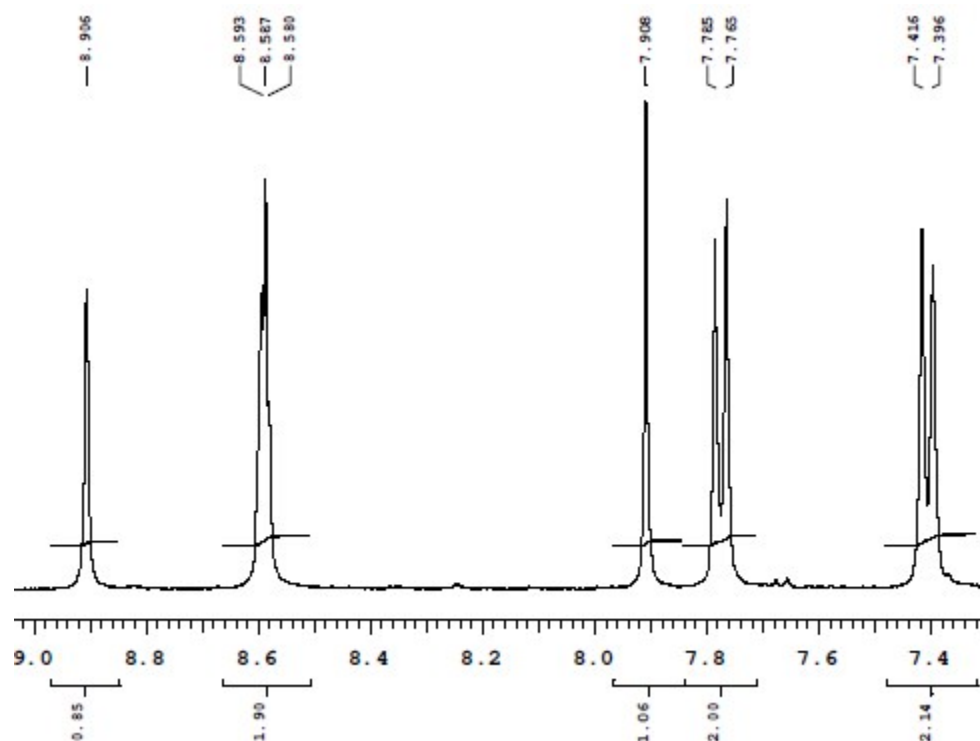

**Figure S103.**  $^1\text{H}$  NMR Spectra & its expansion for compound **11** in  $\text{DMSO-}d_6$

NUCLEUS : C13  
 FREQ (MHz) : 100.50  
 AT (sec) : 1.28  
 SW (ppm) : 253.84  
 RD (sec) : 1.00  
 PW (usec) : 5.05  
 Scans : 1600  
 Solvent : dmsc  
 Data Points : 65536  
 LB (Hz) : 2.00  
 TEMP (K) : 303.15  
 EXP : s2pul  
 DATE : Jan 8 2016  
 System : VNMR5\_400

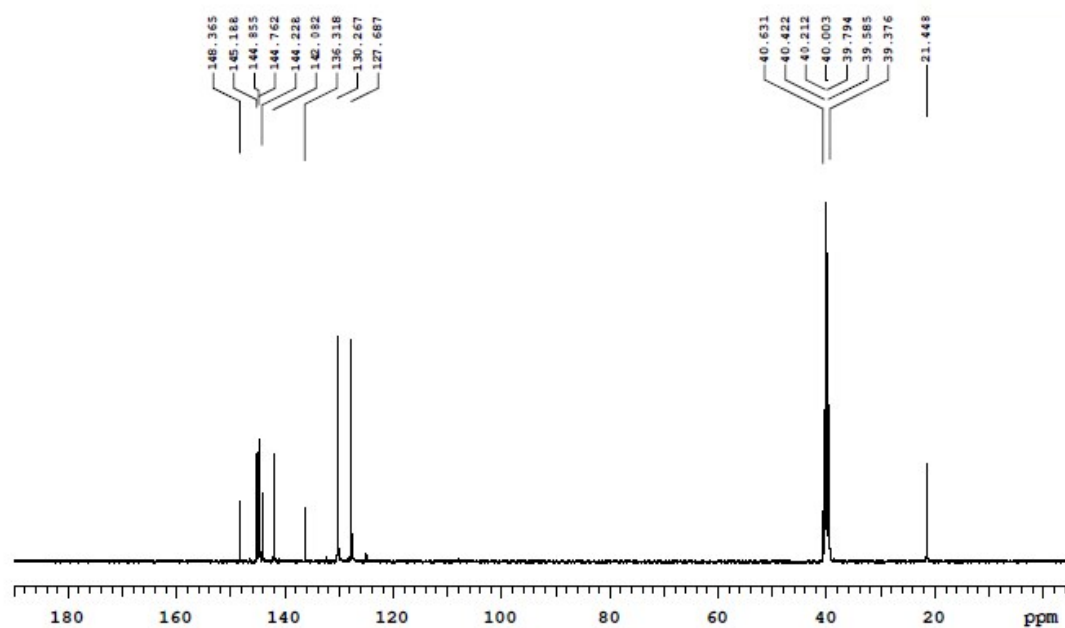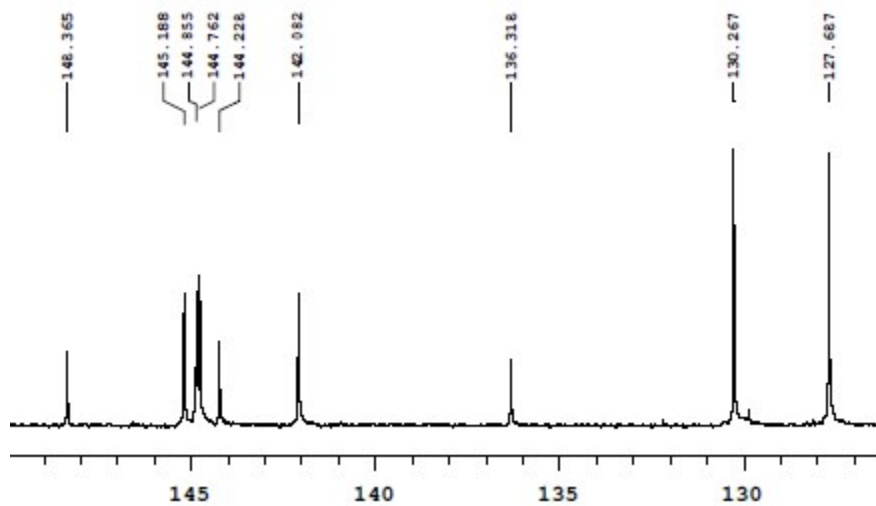

**Figure S104.**  $^{13}\text{C}$  NMR Spectra & its expansion for compound **11** in  $\text{DMSO-}d_6$

NUCLEUS : H1  
 FRQ (MHz) : 399.64  
 AT (sec) : 2.27  
 SW (ppm) : 18.08  
 RD (sec) : 1.00  
 FID (sec) : 6.60  
 Scans : 64  
 Solvent : dmsc  
 Data Points : 32768  
 LB (Hz) : 2.00  
 TEMP (K) : 303.15  
 EXP : s2pul  
 DATE : Jan 11 2016  
 System : VNMR-400

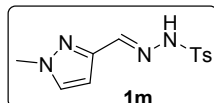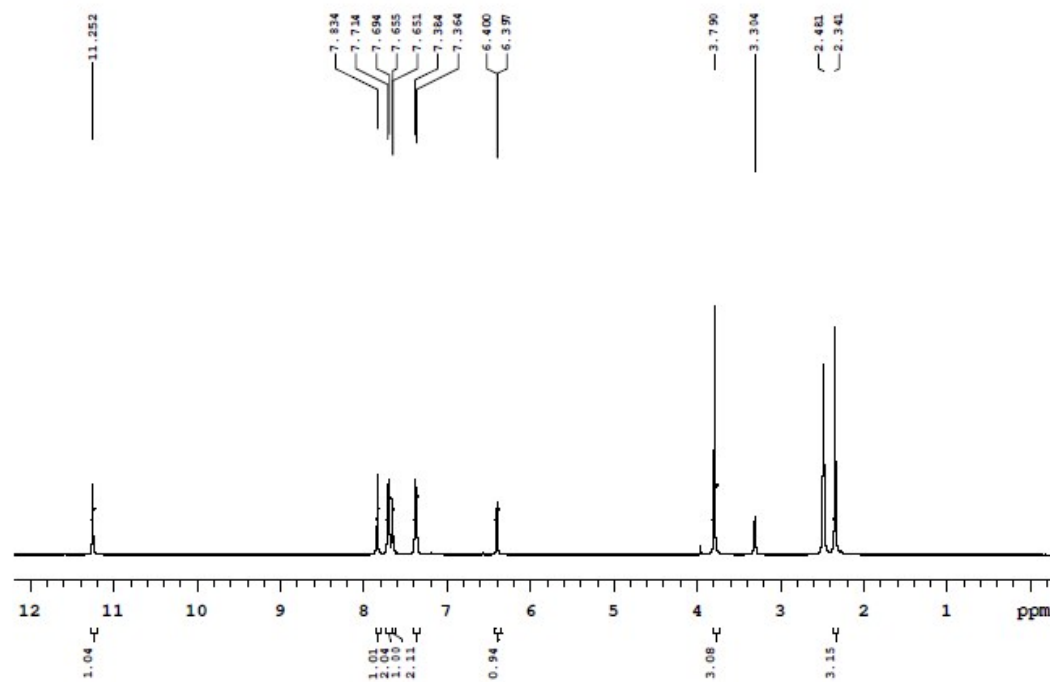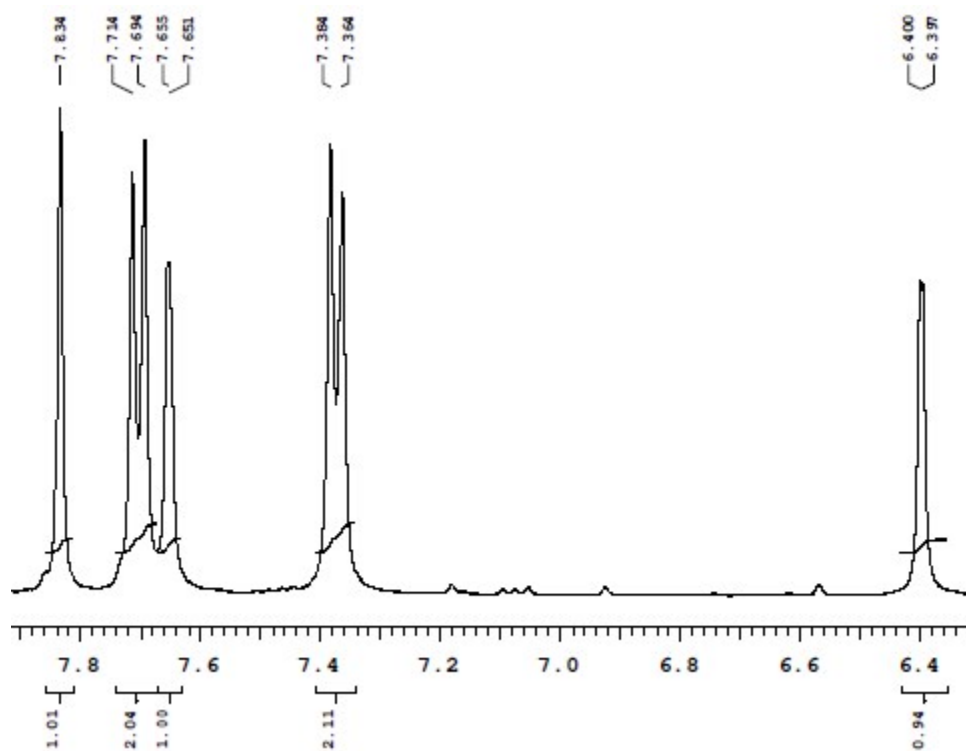

**Figure S105.**  $^1\text{H}$  NMR Spectra & its expansion for compound **1m** in  $\text{DMSO}-d_6$

NUCLEUS : C13  
 FREQ (MHz) : 100.50  
 AT (sec) : 1.28  
 SW (ppm) : 253.84  
 RD (sec) : 1.00  
 DW (usec) : 5.05  
 Scans : 1000  
 Solvent : dmsd  
 Data Points : 65536  
 LB (Hz) : 3.00  
 TEMP (K) : 303.15  
 EXP : zgpg30  
 DATE : Jan 13 2016  
 System : VNMRS\_400

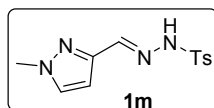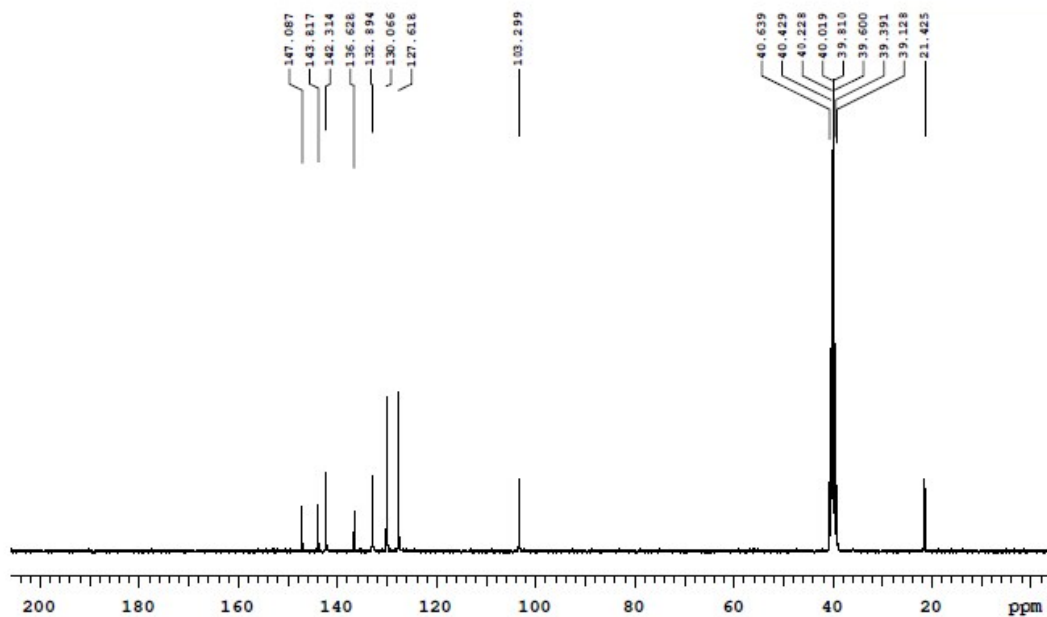

**Figure S106.**  $^{13}\text{C}$  NMR Spectra for compound **1m** in  $\text{DMSO-}d_6$

NUCLEUS : H1  
 FREQ (MHz) : 399.64  
 AT (sec) : 2.27  
 SW (ppm) : 18.08  
 RD (sec) : 1.00  
 PW (usec) : 6.60  
 Scans : 64  
 Solvent : dmsd  
 Data Points : 32768  
 LB (Hz) : 1.00  
 TEMP (K) : 303.15  
 EXP : s2pu1  
 DATE : Feb 16 2016  
 System : VNMR5\_400

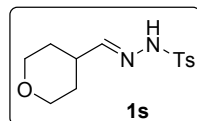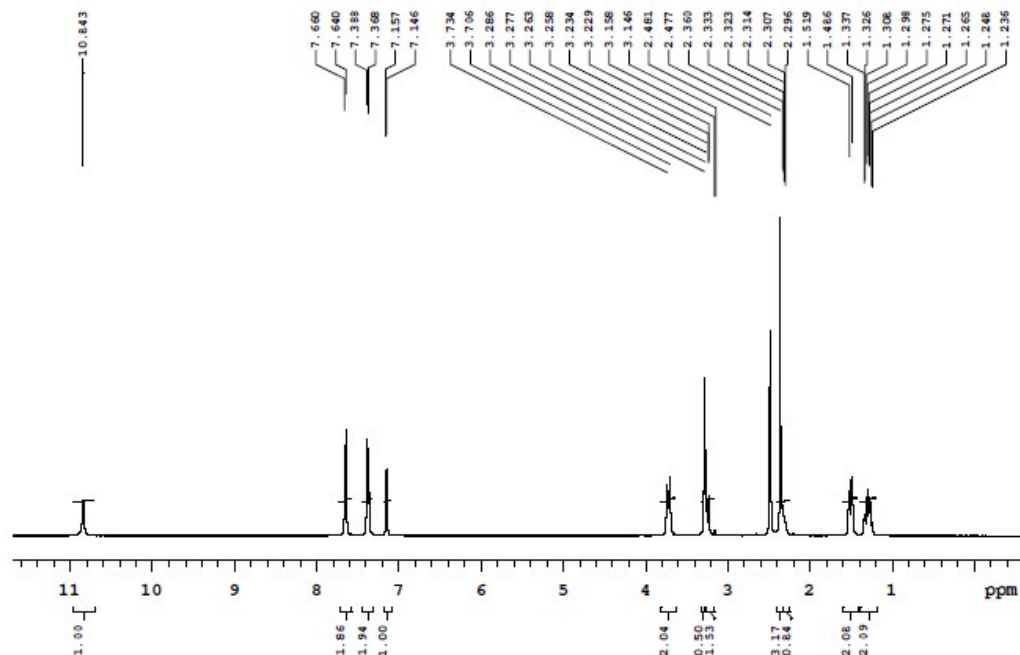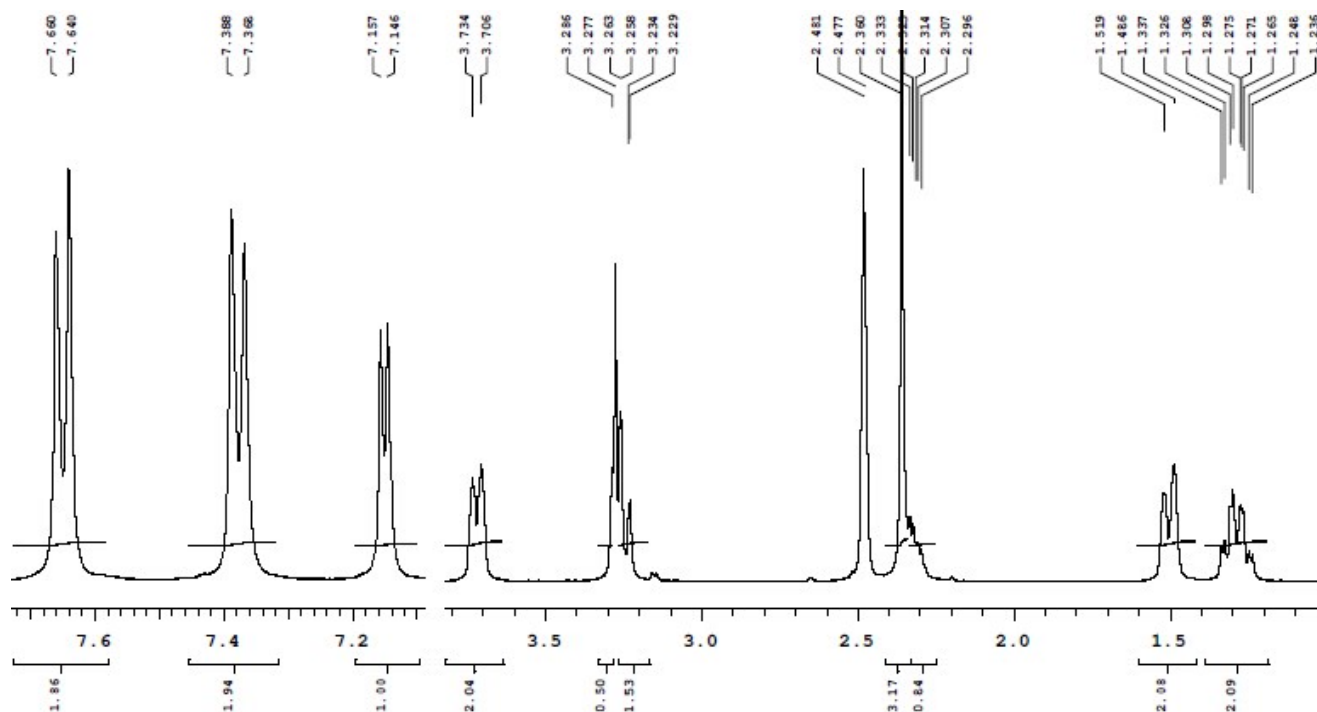

**Figure S107.**  $^1\text{H}$  NMR Spectra & its expansion for compound **1s** in  $\text{DMSO-}d_6$

NUCLEUS : C13  
 FREQ (MHz) : 100.50  
 AT (sec) : 1.28  
 SW (ppm) : 253.84  
 RD (sec) : 1.00  
 PW (usec) : 5.05  
 Scans : 1000  
 Solvent : dms0  
 Data Points : 65536  
 LB (Hz) : 3.00  
 TEMP (K) : 303.15  
 EXP : s2pu1  
 DATE : Feb 17 2016  
 System : VNMRS\_400

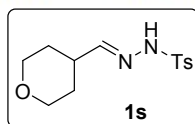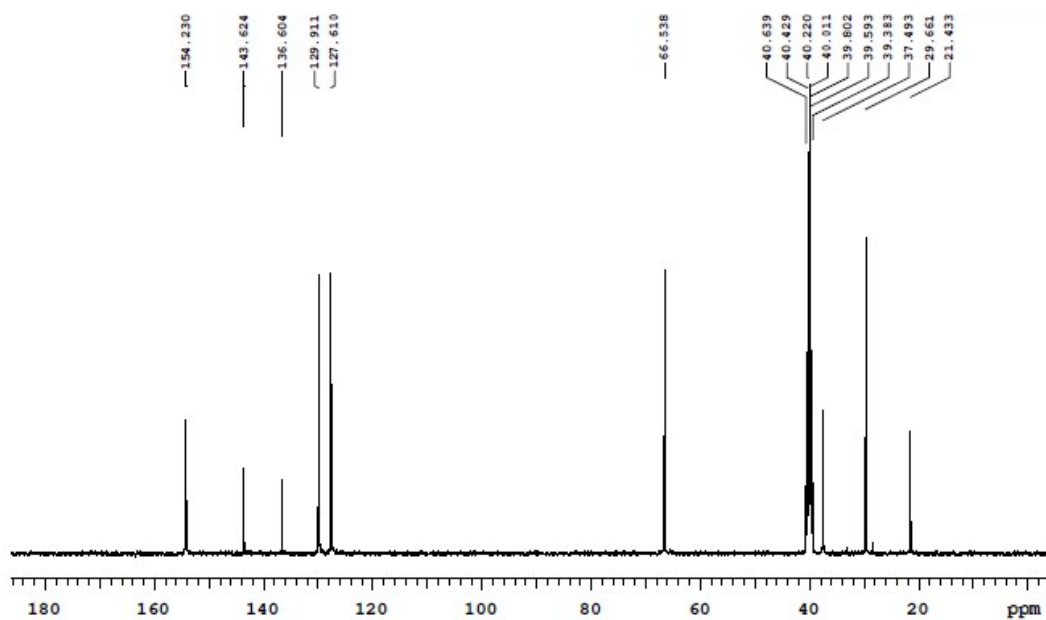

**Figure S108.**  $^{13}\text{C}$  NMR Spectra for compound **1s** in  $\text{DMSO-}d_6$
